# Supplementary material for: Molecular Insights into Female Hybrid Sterility in Interspecific Crosses between <em>Drosophila melanogaster</em> and <em>Drosophila simulans</em>
Source: Preprints.org preprint supplement (doi:10.20944/preprints202404.1438.v1), 2024-04-23
Supplement: Supplementary file 1 [file supplementary]

Archive with 5 entries (5 files):
- Supplementary Figures S1-S4.docx.pdf
- Table S1.xlsx
- Table S2.xlsx
- Table S3.xlsx
- Table S4.xlsx
