# Supplementary material for: Molecular Insights into Female Hybrid Sterility in Interspecific Crosses between <em>Drosophila melanogaster</em> and <em>Drosophila simulans</em>
Source: Preprints.org preprint supplement (doi:10.20944/preprints202404.1438.v1), 2024-04-23
Supplement: Supplementary file 1 [file supplementary]

## Sheet: test
gene name (according to D. mel annotation)	mel1.mel	mel2.mel	hybr1.mel	hybr2.mel	sim1.mel	sim2.mel	mel1.sim	mel2.sim	hybr1.sim	hybr2.sim	sim1.sim	sim2.sim	mel.mel(mean)	hybr.mel(mean)	sim.sim(mean)	hybr.sim(mean)	hybr_norm(mel)	hybr_norm(sim)
Zip71B	28.0	15.0	8.0	11.0	2.0	0.0	0.0	0.0	11.0082	13.0	17.0	44.0527	21.5	9.5	30.52635	12.004100000000001	0.4418604651162791	0.3932373179236955
Tango9	869.1986	561.3491	417.82794	474.3544	2.07038	1.03217	1.04087	3.09156	644.889	510.23	734.9295	996.968	715.27385	446.09117000000003	865.94875	577.5595000000001	0.6236648662606636	0.6669673003165604
Noa36	1778.0	1228.92	711.285	723.757	0.0	1.03056	0.0	1.07603	937.715	886.243	1169.0	2115.97	1503.46	717.521	1642.485	911.979	0.47724648477511866	0.5552434268806108
CG10011	202.708	335.351	294.453	331.746	1.097	3.39316	6.5823	10.943	650.975	617.218	704.803	1003.28	269.0295	313.0995	854.0415	634.0965	1.1638110318756865	0.7424656764337564
CG10013	2.0	2.0	18.0	12.0	0.0	3.0	0.0	0.0	161.0	141.0	11.0	11.0	2.0	15.0	11.0	151.0	7.5	13.727272727272727
Snm1	1052.6	1038.39	784.174	871.27	0.0	3.00791	1.00249	1.00084	779.465	836.281	870.0	1302.99	1045.495	827.722	1086.495	807.873	0.7917034514751387	0.7435588750983669
bowl	373.9557	218.0001658101	63.59979	65.4454957603	1.04268288304	7.4071	1.04394	0.0	59.400200599828	70.55450107478	248.95708	463.5932	295.97793290505	64.52264288015	356.27514	64.977350837304	0.21799815360170424	0.18237969350683295
Fak	1014.7069329	1216.576	978.1476	1011.5567	0.0	3.34504	66.2924	87.42412	1208.8518	1211.4385	1145.9962	1958.6537	1115.64146645	994.8521499999999	1552.3249500000002	1210.1451499999998	0.8917310622790359	0.7795694773829408
CG10026	16.0	10.0	4.0	5.0	0.0	1.0	0.0	0.0	6.0	9.0	20.00005	39.0	13.0	4.5	29.500025	7.5	0.34615384615384615	0.2542370726804469
for	5905.6282	6064.11821090058	4195.26589	4694.0580204232	3.350045	8.96698	673.379	591.883	5885.7359	6080.9391	5854.6485	9544.0354	5984.873205450291	4444.6619552116	7699.34195	5983.3375	0.7426493097905474	0.7771232319406205
tj	1919.0	1303.97	118.7784	117.2676	0.0	1.04875	0.0	1.02914	142.222	137.732	1276.0	2365.95	1611.4850000000001	118.023	1820.975	139.977	0.07323865875264118	0.0768692595999396
CG10038	561.9995	369.9997	234.556	222.5646	0.0	2.01148	0.0	0.0	348.4441574	308.4346	416.9999	660.988200847208	465.9996	228.5603	538.994050423604	328.4393787	0.4904731677881269	0.6093562228411877
rho	27.0	19.0	1.22243	3.42557	0.0	0.0	1.0	0.0	11.7776	5.57443	24.0	27.0	23.0	2.324	25.5	8.676015	0.10104347826086955	0.34023588235294117
MBD-R2	2220.97	2280.91	1758.47	1984.05	3.07732	4.12355	1.03183	3.09419	2232.53	2216.95	2272.92	3608.88	2250.9399999999996	1871.26	2940.9	2224.74	0.8313238025002889	0.7564827093746811
RtGEF	1142.9991	1128.99974202	838.948014	922.7943	38.05795	80.41919	0.0	0.0	903.0531	888.20519	1209.9466	1902.58342	1135.9994210099999	880.871157	1556.26501	895.629145	0.7754151460894503	0.5754991208084798
GstD1	14616.946	10581.7937	903.703	1239.22	21.9057	18.6145	2.03808	8.18154	7023.3	6246.78	7151.09	11836.4	12599.36985	1071.4615	9493.744999999999	6635.04	0.08504088004052043	0.6988854240344564
Dtwd2	410.499	359.192	187.972	190.942	28.421	46.5662	0.0	0.0	149.19	128.512	189.767	296.932	384.8455	189.457	243.3495	138.851	0.49229366070280145	0.5705826393725896
CG10053	238.0	138.0	67.0	103.635	1.0	1.00727	0.0	0.0	121.506	116.326	143.49	268.994	188.0	85.3175	206.24200000000002	118.916	0.4538164893617021	0.5765847887433209
CG10055	1561.53	1650.03	1160.76	1310.51	4.60199	4.57568	119.473	134.971	1450.24	1406.49	1575.4	2334.42	1605.78	1235.635	1954.91	1428.365	0.7694920848435028	0.7306551196730284
MAGE	503.0	376.0	259.0	267.485	0.0	0.0	0.0	0.0	285.0	282.515	323.0	527.0	439.5	263.2425	425.0	283.7575	0.5989590443686007	0.6676647058823529
Galphai	3357.09	3247.89	2398.71	2439.25	2.29193	1.13304	137.911	106.107	3055.29	2650.75	3302.71	4947.87	3302.49	2418.98	4125.29	2853.02	0.7324715593385598	0.6915925910663251
Sas-4	916.0	1183.98	1088.91	1162.86	0.0	1.00688	0.0	1.01504	1508.09	1364.14	1369.0	2250.99	1049.99	1125.885	1809.995	1436.115	1.0722816407775313	0.793435893469319
CG10062	121.829	66.4202	21.7063	25.7565	5.41469	1.04471	8.17101	9.57981	9.29371	9.24351	56.5853	139.955	94.12459999999999	23.7314	98.27015	9.26861	0.25212749908100546	0.09431765393662267
CG10063	35.0	14.0	8.0	4.00434	5.0	3.0	3.0	0.0	946.0	938.457	20.0	54.0314	24.5	6.00217	37.015699999999995	942.2284999999999	0.24498653061224487	25.45483402988462
CG10064	10.0	8.0	6.01018	5.0	3.46269	1.06784	0.0	1.0	5.98982	3.0	34.5373	30.9322	9.0	5.50509	32.734750000000005	4.49491	0.6116766666666666	0.13731309999312655
Act57B	3297.36	1622.77	4060.45	3538.88	0.0	21.0495	3.00982	4.28795	3525.4	3302.23	1485.05	2971.01	2460.065	3799.665	2228.03	3413.815	1.5445384573171848	1.5322123131196617
CG10068	667.365	495.776	304.144	329.669	1.03461	0.0	1.03134	0.0	418.243	361.669	523.362	796.767	581.5705	316.9065	660.0645	389.956	0.5449150189014057	0.5907846884660515
MFS16	1377.3013	1048.3757	349.1231	320.6018	3.12819	5.23128	43.5853	38.7349900103954	629.742000091242	561.1939	1325.8722	2402.7637	1212.8385	334.86245	1864.31795	595.4679500456209	0.27609813672636546	0.3194025729600581
emc	1861.63	1319.07	761.799	796.237	283.067	424.493	5.3707	1.93212	630.201	642.763	798.933	1343.51	1590.35	779.018	1071.2215	636.482	0.48984060112553846	0.5941646988974735
RpL29	26024.929	11528.036	4122.9247	4328.1637	8.02809	17.08616	12.0323	3.00521	4632.08	4657.83	10343.0	23516.9	18776.4825	4225.5442	16929.95	4644.955	0.22504450447521257	0.27436318477018534
sgl	1603.79	1276.33	604.995	690.936	1.06103	3.1672	188.211	166.667	885.005	852.064	1015.94	1836.83	1440.06	647.9655	1426.385	868.5345	0.44995729344610647	0.6089060807565979
Uqcc1	808.933	498.174	289.942	290.194	0.0	0.0	0.0	0.0	348.835	280.293	471.908	788.899	653.5535	290.068	630.4035	314.56399999999996	0.44383206577579337	0.4989883463527724
spir	2401.3730108242	2397.04907	1652.87122	1802.0343	19.556390401133	53.64576	137.630321613	143.9494	2006.123	2114.9715	2372.44565905316	4001.35620414376	2399.2110404121	1727.4527600000001	3186.90093159846	2060.54725	0.720008674061155	0.6465677139723598
CG10077	8201.74	5947.395	3863.034	4187.2432	242.97287	499.9995	219.256827	169.6060545	3990.969	3755.758	5079.032	9180.003	7074.5675	4025.1386	7129.5175	3873.3635	0.5689589646292865	0.5432855028408304
Egfr	871.663	557.754	106.2837	99.27341	2.09744	1.03993	61.3374	31.2458	89.7163	126.7269	679.9022	1143.96	714.7085	102.778555	911.9311	108.2216	0.14380485890401473	0.11867300062471824
mahj	3389.247	3048.081	1850.75	2130.617	2.09393	4.25111	0.0	0.0	2196.93	2160.12	2951.97	5009.83	3218.6639999999998	1990.6835	3980.8999999999996	2178.5249999999996	0.6184813015586592	0.5472443417317692
Ip6k	1149.437	895.5612	724.098	788.3186	133.822	262.773	31.5668	36.4384	679.5432	676.7839	1179.005	1877.9562	1022.4991	756.2083	1528.4806	678.16355	0.7395686705249912	0.443684761193567
Abp1	1942.93	1794.08	1269.66	1428.66	0.0	2.54923	22.0699	11.9202	1776.34	1640.34	1859.0	3405.45	1868.505	1349.16	2632.225	1708.34	0.7220531922579817	0.649009868077387
swm	2935.977	3699.245	2162.6970324914	2384.953	8.5687524668	8.57325	66.02497	118.755	3053.305	2856.049	4082.427495	6019.430116856	3317.611	2273.8250162456998	5050.928805928	2954.6769999999997	0.6853802378415371	0.5849769643421338
CG10089	42.68495	8.0	17.91371	18.88257	31.4882	74.98523	2.3150148	4.0	15.0862900258884	30.1174	62.5118	174.0148	25.342475	18.398139999999998	118.2633	22.6018450129442	0.7259803945747209	0.19111461470248334
Psa	3337.145406996	2384.5631	1021.2322	1194.42638651	12.0159105313	18.44554	63.8512	51.4328	1350.77	1251.5704	2314.989	4167.556	2860.8542534979997	1107.829293255	3241.2725	1301.1702	0.3872372358362696	0.4014380771749367
ArgRS-m	621.409	465.614	343.641	349.2145	11.1155	30.2086	0.0	0.0	208.0	183.0	231.0	331.0	543.5115	346.42775	281.0	195.5	0.6373880773451897	0.6957295373665481
CG10097	11.0	12.44124	17.53561	14.0	1.0	0.0	0.0	0.0	19.0	21.0	26.0	27.0	11.72062	15.767805	26.5	20.0	1.345304685247026	0.7547169811320755
CG10098	1069.24	996.066	658.6	767.928	1.17748	1.17459	9.36797	7.15791	774.013	631.734	728.426	1123.06	1032.653	713.264	925.7429999999999	702.8735	0.6907102385796584	0.759253378097377
Ist1	967.739	739.53177	490.2972	558.609900081355	3.28136	4.47971861802	0.0	0.0	753.7024	684.763	736.9842	1244.653	853.635385	524.4535500406776	990.8186000000001	719.2327	0.6143765350597288	0.7258974548923486
Sin1	704.0	732.0	595.346	709.811	0.0	4.41855	0.0	0.0	1063.65	1082.19	1106.0	1704.58	718.0	652.5785000000001	1405.29	1072.92	0.9088837047353762	0.7634865401447389
Tsp42Ee	6974.7198605	3558.88603334	1416.6166535	1362.2242	15.300545621	5.1146114987	20.2789	9.11209	1669.39	1537.77	2873.7	5681.89	5266.80294692	1389.42042675	4277.795	1603.58	0.26380717880522303	0.3748613479608069
velo	2977.807	2774.361	1330.143	1424.0049	2.06625	5.186706	21.19184	13.85851	2048.853	1978.996	2966.934	5183.821	2876.084	1377.07395	4075.3775	2013.9245	0.4788017144144608	0.49416882239743437
Cpsf160	1268.582	1415.257	1063.663	1146.382	1.05708	2.11625	27.417	16.7432	1160.34	1212.62	1006.94	1663.88	1341.9195	1105.0225	1335.41	1186.48	0.8234640751550298	0.8884761983211148
ttv	1054.0675	1135.03932	651.22879	633.35158	2.281791	3.304642	79.9327	63.9601	781.772	841.648	1081.72	1775.7	1094.55341	642.2901850000001	1428.71	811.71	0.5868057046206636	0.5681418902366471
LamC	1148.9981	705.9506	246.397562578	200.1833	3.41104	1.063857986	0.0	1.04975	244.6029	220.8170552057	475.5889	974.9358	927.47435	223.290431289	725.26235	232.70997760285002	0.2407510582788624	0.3208631712412068
Men	3490.083	3278.066	2108.932	2271.064	7.54372	6.43496	32.9226	39.9385	2775.069	2731.93672	2674.452	3429.563	3384.0744999999997	2189.9979999999996	3052.0075	2753.50286	0.6471482823442568	0.902194001816837
SP1173	615.8429	346.92990123213	549.61927666	538.19095	23.9634	76.62895	26.1569	13.0704	439.381	431.809	193.037	387.371	481.386400616065	543.90511333	290.204	435.595	1.1298722037721158	1.5009958511943322
Polr1A	4330.85	3348.94	1050.4	1118.4	0.0	2.03911	7.14734	3.0645	1152.6	1139.6	2615.0	4562.96	3839.8950000000004	1084.4	3588.98	1146.1	0.2824035553055487	0.3193386421768859
Top3alpha	1636.99	1457.99	868.288	982.926	1.00152	3.01706	1.00514	3.00863	935.712	956.074	1256.0	1853.98	1547.49	925.607	1554.99	945.893	0.5981343982836722	0.6082952301944065
zpg	4864.939	3426.766	1504.45	1599.833	2.00563	4.00868	232.062	124.232	2570.55	2286.17	4191.99	6910.99	4145.8525	1552.1415000000002	5551.49	2428.36	0.3743841586260004	0.4374249075473432
CG10126	59.828300416258	40.0	28.4826	33.99995	2.0	2.02061	11.1717	5.0	27.5174	25.0	32.0	103.9794	49.914150208129	31.241275	67.9897	26.258699999999997	0.6259001679830675	0.3862158532836591
tra2	1099.9555	824.001200019097	454.2328	335.9018	10.06498	8.0	1.0442614	0.0	544.767	435.0977	822.935	1272.0	961.9783500095485	395.0673	1047.4675	489.93235000000004	0.4106821115008239	0.46773035917582173
ndl	1981.41	1282.96	247.854	281.485	0.0	2.03124	34.5941	45.0401	263.146	285.515	1682.0	2035.97	1632.185	264.6695	1858.9850000000001	274.33050000000003	0.16215655700793724	0.14757004494388068
Sec61beta	3901.83	2012.27	1094.63	1007.83	3.32976	6.77929	1.54616	0.0	993.488	976.847	1642.89	2743.05	2957.05	1051.23	2192.9700000000003	985.1675	0.3554995688270404	0.44923893167713186
CG10132	42.0	20.0	20.548	31.2212	0.0	0.0	0.0	0.0	26.452	33.7788	64.0	118.0	31.0	25.8846	91.0	30.1154	0.8349870967741935	0.33093846153846157
JMJD7	600.86	412.0	169.418	191.517	0.0	0.0	104.14	89.0	250.582	190.483	349.0	469.0	506.43	180.4675	409.0	220.5325	0.3563523093023715	0.5391992665036675
CG10137	79.3959	43.4976	13.9469	10.1083	0.0	0.0	0.0	0.0	28.6697	15.00004889	73.3718813	156.9488	61.446749999999994	12.0276	115.16034065	21.834874445	0.19574021408780776	0.18960411476518155
CG10139	438.999	344.0	316.588	256.9998	0.0	1.0	1.00192	0.0	273.4119	261.0005	312.0	532.0	391.4995	286.7939	422.0	267.20619999999997	0.7325524042814869	0.6331900473933648
robl62A	26.0	13.0	15.0	16.0	10.0	15.999959277	0.0	3.0	4.0	3.0	14.0	27.0	19.5	15.5	20.5	3.5	0.7948717948717948	0.17073170731707318
Ance-5	11.0	3.0	24.3776	21.453	0.0	0.0	1.0	0.0	39.6224	25.547	5.0	5.0	7.0	22.915300000000002	5.0	32.5847	3.273614285714286	6.51694
Vps8	584.559	707.076	362.886	491.884	2.00592	2.00599	34.4406	46.9241	577.114	537.116	682.994	1013.99	645.8175	427.385	848.492	557.115	0.6617736434828725	0.6565942872767215
mspo	17.99996	7.0	21.0909	17.9433	0.0	0.0	0.0	0.0	44.9091	28.9231	17.0	39.0	12.49998	19.5171	28.0	36.9161	1.561370498192797	1.3184321428571428
CG10147	135.3825	226.5485	142.0596	129.4043	0.0	1.10692	7.61719	5.45149	92.9403	54.5957	96.0	147.893	180.9655	135.73194999999998	121.9465	73.768	0.7500432402861318	0.6049210104431042
Rpn6	5685.3316	4150.79	3030.84	3095.7	549.38232	794.61971	58.6726	53.2063	2788.16	2593.3	3362.62	5264.38	4918.0608	3063.27	4313.5	2690.73	0.622861352181738	0.6237927437116031
Trs31	203.966	122.07	32.7761	43.1919	0.0	0.0	46.0337	31.9296	171.224	173.808	252.0	497.0	163.018	37.983999999999995	374.5	172.516	0.23300494423928642	0.4606568758344459
Spred	1271.314	1214.707	385.4275	480.2987	1.92355	1.8883	128.686	155.2926	548.572	540.702	1292.076	2044.111	1243.0105	432.86310000000003	1668.0935	544.637	0.34823768584416626	0.326502681054749
GILT2	739.987	382.0	114.969	121.909	0.0	1.0	1.01268	0.0	4.0315	4.09053	19.0	39.0	560.9935	118.439	29.0	4.061015	0.21112365829550608	0.14003500000000002
Fgop2	1156.641	786.387	638.3414	702.8043	5.58747	4.44312	62.3599	29.6131	812.659	798.109	802.413	1428.56	971.514	670.57285	1115.4865	805.384	0.690234880814893	0.7220024626026402
BEAF-32	1628.693	1288.911	1064.3568	1060.1136	0.0	2.00603	1.03483	1.00215	1544.212	1473.494	1831.004	2898.991	1458.8020000000001	1062.2352	2364.9975	1508.853	0.7281558429451015	0.6379934862510426
eIF3d1	10792.3	6680.75	3123.26	3235.66	3.20365	8.54449	46.688	28.2502	3365.74	3049.34	6727.8	11714.5	8736.525	3179.46	9221.15	3207.54	0.36392730519285416	0.3478459845030175
CG10163	542.731	192.812	22.0	69.8607	0.0	0.0	71.2688	20.1883	28.0	93.1393	28.0	83.0	367.7715	45.93035	55.5	60.56965	0.1248882798150482	1.091345045045045
CG10165	270.5882	190.5025	104.62686	92.89167	31.0	62.01036	1.01585	0.0	101.75643	100.0	170.6283	226.0408	230.54534999999998	98.759265	198.33454999999998	100.878215	0.4283724004843299	0.5086265353162119
Dpm1	838.0	447.0	287.0	315.364	11.0276	15.0	0.0	0.0	340.0	344.636	392.972	737.0	642.5	301.182	564.986	342.318	0.4687657587548638	0.6058875795152446
Mfap1	563.198	411.321	288.491	320.383	0.0	0.0	96.8974	116.483	618.674	573.992	518.735	971.755	487.2595	304.437	745.245	596.333	0.6247943857431205	0.8001838321625774
CG10171	762.882	549.881	346.21	416.343	32.5179	68.6645	3.1186246865	2.11889381513	284.472	259.377	310.932	519.579	656.3815	381.2765	415.2555	271.92449999999997	0.5808763653454584	0.6548366005989084
Best2	1022.91	739.883	617.684	620.091	1.00969	1.0077	22.0884	14.1175	583.316	609.909	629.99	921.9919	881.3965000000001	618.8875	775.99095	596.6125	0.7021669589112278	0.768839507728795
CG10175	80.99995	45.00001	5.0	7.0	1.0	0.0	0.0	0.0	4.0	9.0	4.0	5.0	62.99998	6.0	4.5	6.5	0.09523812547242079	1.4444444444444444
Ugt301D1	182.0005	140.0003	86.16	108.1709	0.0	0.0	0.0	0.0	83.84	131.829	88.0	127.0	161.0004	97.16544999999999	107.5	107.8345	0.6035106123959939	1.0031116279069767
Mdr65	30.0	13.0	19.9308	24.1135	0.0	0.0	0.0	0.0	11.0692	6.88653	8.0	10.0	21.5	22.02215	9.0	8.977865	1.024286046511628	0.9975405555555555
CG10184	284.773	173.0	52.147	40.8183	2.03232	1.01065	1.22718	0.0	186.853	144.182	585.968	885.989	228.8865	46.48265	735.9784999999999	165.51749999999998	0.20308165837653158	0.22489447721638609
Hasp	3.000004	5.999999	0.0	0.0	1.07468	10.1364	0.0	0.0	3.0	9.0	31.92535	67.8636	4.5000015	0.0	49.894475	6.0	0.0	0.12025379563568912
cyst	1173.8076	1641.002	1394.8694	1478.1418	2.1894	5.48984	32.1932	37.0024	1850.1268	1796.85621	1806.8156	2722.5102	1407.4048	1436.5056	2264.6629000000003	1823.491505	1.0206769225172458	0.8051933490851992
Ctu2	272.9999	143.0	53.5606	27.0	0.0	2.03951	0.0	0.0	146.439	115.0	273.0	496.1081	207.99995	40.2803	384.55404999999996	130.71949999999998	0.19365533501330165	0.33992490782505086
Mlp84B	311.8358669	148.000330555408	207.9560508309	216.320712972	3.54158	1.167980043	1.16386	0.0	248.0438186	206.6789679	99.458400223212	189.8317419	229.91809872770398	212.13838190145	144.645071061606	227.36139325	0.9226693464992906	1.5718571782730444
Poc1	624.7	613.968	536.927	499.355	3.08014	4.05985	6.30011	1.03194	832.073	686.645	715.92	1040.94	619.3340000000001	518.1410000000001	878.4300000000001	759.3589999999999	0.836609971356328	0.8644502123105995
eIF4G2	2917.38	3547.8	2786.37	3506.03	43.5351	47.0381	4.34223	4.32927	3921.3	4362.17	3835.87	6349.17	3232.59	3146.2	5092.52	4141.735000000001	0.9732752993729485	0.8132977386441291
CG10194	481.0	302.0	147.0	138.0	0.0	0.0	0.0	0.0	158.0	116.0	232.0	404.0	391.5	142.5	318.0	137.0	0.36398467432950193	0.4308176100628931
CG10195	372.0003	232.0	126.0	126.9999	22.0	40.0	0.0	0.0	73.0	50.0	115.0	231.0	302.00014999999996	126.49995	173.0	61.5	0.41887379857261664	0.3554913294797688
Nup98-96	5150.4383	5731.863	4166.4133	5028.728	7.24285	7.26523	34.5581	44.1412	5482.58	5929.27	6099.76	9688.73	5441.15065	4597.57065	7894.245	5705.925	0.8449629399619729	0.7227955301615291
x16	4023.37	2847.47	2012.794	1980.06	141.531	274.226	45.6382	46.5379	2604.21	2624.94	3108.47	5348.77	3435.42	1996.4270000000001	4228.62	2614.575	0.5811304003586171	0.6183045532585099
nop5	9382.6	6150.0	2269.83	2111.67	6.10916	13.5908	897.402	529.004	3859.17	3437.33	6578.89	13288.4	7766.3	2190.75	9933.645	3648.25	0.28208413272729616	0.3672619667805725
NaPi-T	49.6212	62.0	13.99998	30.06638	1.0344	1.00715	4.37883	0.0	21.0	32.9336	81.9656	180.993	55.8106	22.03318	131.4793	26.9668	0.3947848616571046	0.2051030086104809
CG10208	183.947	119.651	87.5932	72.0308	1.00453	0.0	2.05307368332	9.3492800489	120.4069	146.9692	462.996	1060.0	151.799	79.812	761.498	133.68805	0.5257742145863938	0.1755592923421992
CG10209	1113.0	769.0	400.064	471.062	4.18626	1.0934	0.0	0.0	388.937	418.938	406.814	676.907	941.0	435.563	541.8605	403.9375	0.46287247608926674	0.7454640078027462
Dmtn	2435.0	1911.9254	1035.20460059163	1226.7438	235.15188	402.3761	0.0	5.68842	1204.961	1033.3025	1638.5684	2955.962	2173.4627	1130.974200295815	2297.2652	1119.13175	0.5203559280294137	0.48715827410783924
tst	1311.5	1270.3006	647.04702606	709.73876612	3.02016	3.76531	0.0	1.23523	749.731	696.402	1192.88	1785.11	1290.9003	678.39289609	1488.995	723.0665	0.525519202443442	0.4856070705408682
SMC2	1264.7	1526.3	1490.27	1786.25	0.0	0.0	24.3034	42.7036	1933.73	2148.75	1731.0	2738.0	1395.5	1638.26	2234.5	2041.24	1.1739591544249373	0.9135108525397181
CG10214	788.935	448.703	214.392	235.0	0.0	0.0	0.0	0.0	315.892	250.43	387.676	692.045	618.819	224.696	539.8605	283.161	0.3631045588451551	0.5245077200499018
Ercc1	233.0	152.0	110.0	108.435	0.0	0.0	3.0	3.0	190.0	164.164	244.942	397.603	192.5	109.2175	321.27250000000004	177.082	0.5673636363636364	0.5511894108583834
udt	1880.773	1545.003	1213.299	1505.288	2.40795	3.60191	1.2259	0.0	1187.7	1272.71	1289.59	1907.4	1712.888	1359.2935	1598.495	1230.205	0.793568230964313	0.7696020319112665
SdhD	1590.11	804.402	479.572	540.589	45.419	87.8883	1.07924	1.08254	565.399	556.389	812.852	1408.34	1197.2559999999999	510.08050000000003	1110.596	560.894	0.4260412977675619	0.5050387359579901
Hrd3	1714.3055	1916.9	1274.6	1564.05	5.48446	14.4734	0.0	1.09796	1523.4	1571.95	1848.52	2611.53	1815.60275	1419.3249999999998	2230.025	1547.6750000000002	0.7817376350636172	0.6940168832187981
CG10222	457.0	378.0	257.0	231.478	2.00511	14.0	0.0	0.0	285.0	248.522	339.995	498.0	417.5	244.239	418.9975	266.76099999999997	0.5850035928143713	0.6366648965685952
Top2	11958.906	11255.96	6420.327	7390.843	7.23075	15.4159	3.09726	3.08358	5237.67	5791.16	6543.77	10544.6	11607.433	6905.585	8544.185000000001	5514.415	0.5949278363269467	0.6453997660397099
RanBP3	2567.881	1996.95342	1503.205	1519.72269	5.416368	5.780959	95.66160352792	61.44680285433	2217.370232824	1957.344	2051.089	3258.7833	2282.41721	1511.463845	2654.93615	2087.3571164120003	0.6622206660455386	0.7862174449701927
CG10226	55.0	35.0	51.7264	44.6248	0.0	1.07225	0.0	0.0	31.2736	53.3752	36.0	50.9277	45.0	48.1756	43.46385	42.3244	1.070568888888889	0.9737839606937718
Pcf11	2418.86900012563	1977.4033	1482.7192721	1598.56140055764	164.8333	268.97607	66.13073219	37.5968	1365.2801669674	1331.4343	1956.16542	3322.0227	2198.136150062815	1540.64033632882	2639.09406	1348.3572334837	0.7008848547824456	0.5109167020305824
Kat60	1856.314	1544.409	1076.685	1185.659	1.08054	1.22432	87.5138	69.5371	1220.691	1100.226	1299.8574	2080.6947	1700.3615	1131.172	1690.27605	1160.4585000000002	0.6652538298473589	0.6865496910992736
Rpn9	4132.801	2687.334	1718.61	1859.3566	1.10809	11.2407	4.55176	4.50608	2258.25	2145.63	2849.89	4239.76	3410.0675	1788.9832999999999	3544.825	2201.94	0.5246181490542342	0.6211702975464234
Hs2st	634.326	590.891	475.056	481.03	1.20362	0.0	24.6743	14.1094	823.944	667.97	663.796	1161.0	612.6085	478.043	912.398	745.957	0.7803401356657637	0.817578512885824
LanA	6260.76	3104.2	438.785	544.174	4.15641	7.26538	30.242	22.8001	520.215	582.826	2366.84	5536.73	4682.48	491.47950000000003	3951.785	551.5205000000001	0.10496136662623227	0.13956237497738366
CG10237	3027.12641	2309.1503	1796.83571	1739.54848	11.32583	11.65028	352.8766	290.846997	2868.1668	2500.4553	2901.6694	4516.346	2668.138355	1768.1920949999999	3709.0077	2684.3110500000003	0.6627062992016394	0.723727548476106
CG1024	524.0	685.000000117324	523.4406	546.8731	1.00232	6.00397	0.999999974	0.0	681.559	691.127	694.9973	1210.726	604.500000058662	535.1568500000001	952.86165	686.343	0.8852884200960585	0.7202965928999241
Cyp6a22	1434.989	1215.995	808.466	870.459	1.00367	0.0	3.01107	7.0049	1113.534	1053.541	1212.996	1952.003	1325.492	839.4625	1582.4995	1083.5375	0.6333214383791075	0.6847000583570484
Cyp6a23	77.0	44.0	13.0	14.0	1.0	1.0	0.0	0.0	12.3046	8.16624	17.1912	25.3462	60.5	13.5	21.2687	10.235420000000001	0.2231404958677686	0.48124332939954023
Cyp6a20	13.0	10.0	3.00931	2.00719	0.0	0.0	2.0	0.0	319.991	276.993	512.0	800.0	11.5	2.5082500000000003	656.0	298.49199999999996	0.21810869565217395	0.45501829268292676
Cyp6a9	26.6984	12.0369	10.0304	8.68759	0.0	0.0	0.0	0.0	284.456	277.015	187.72	331.32	19.367649999999998	9.358995	259.52	280.7355	0.4832282181885774	1.0817489981504316
Cyp6a8	6.0	2.0	0.0	5.0	0.0	2.0	0.0	0.0	3.0	9.0	33.0	69.0	4.0	2.5	51.0	6.0	0.625	0.11764705882352941
Kank	601.96075	269.9325616	101.48735	93.27524	9.93007	19.98718	62.35364	29.356514	85.16717	70.061287	305.003501412998	658.8028	435.9466558	97.381295	481.903150706499	77.6142285	0.2233789242431436	0.1610577320073813
CG10254	19022.541	17886.347	9482.197	10715.65799	28.0494	34.0703	9.01660202848	13.01930360039	11021.96	10742.26	11044.95	16037.95	18454.444000000003	10098.927495	13541.45	10882.11	0.5472355328071655	0.8036148270680024
Lap1	1238.405	1443.618	1059.447	1180.306	9.55101	24.7877	18.59416	24.38522	1087.55	969.6904	1011.4488	1610.2103	1341.0115	1119.8764999999999	1310.82955	1028.6201999999998	0.8350983567255015	0.7847093468407086
Pi4KIIIalpha	2684.316	2256.018	1077.843	1295.863	5.23735	0.0	19.68837394	10.984615094	1080.1555	1168.1391	1919.762	3580.0	2470.167	1186.853	2749.881	1124.1473	0.480474801906106	0.4087985261907698
Hakai	919.93703	623.90871	434.5754	459.0787	45.50430031718	55.71060010296	1.0627	1.09124	474.424	388.922	537.496	936.289	771.9228700000001	446.82705	736.8924999999999	431.673	0.5788493479925008	0.5858018639082363
CG10265	529.0002	423.0005	374.0001	403.485	1.0	4.0	1.0	1.0	347.0	388.5143	371.0004	549.0002	476.00034999999997	388.74255	460.0003	367.75715	0.8166854289077728	0.7994715438229063
Zif	991.99086	765.994996	713.75931	700.036	2.01508	2.00533	2.00978	1.00509	440.241	341.964	701.985	1186.99	878.992928	706.897655	944.4875	391.10249999999996	0.8042131312801643	0.4140896517952858
Pmvk	351.0	229.0	126.0	131.0	0.0	2.0	0.0	0.0	150.0	126.0	171.0	362.0	290.0	128.5	266.5	138.0	0.44310344827586207	0.5178236397748592
D19A	885.794	1062.85	749.247	935.706	8.61041	16.3975	24.2057	42.2193	1164.75	1126.84	1168.39	1789.6	974.3219999999999	842.4765	1478.995	1145.795	0.8646797465314342	0.7747118820550443
D19B	564.0	518.932	338.136	345.821	0.0	0.0	0.0	0.0	495.864	518.629	635.0	1077.0	541.466	341.97850000000005	856.0	507.24649999999997	0.6315788987674203	0.5925776869158879
CG10274	409.496	554.126	356.275	356.187	0.0	0.0	25.9385	50.8723	568.24	560.159	724.784	1272.3	481.811	356.231	998.5419999999999	564.1995	0.7393583791154623	0.5650233039771988
kon	42.95290089	29.223	40.966603	71.4946669	0.0	0.0	0.0	0.0	41.438	60.87335	14.00001	30.93291	36.087950445000004	56.230634949999995	22.466459999999998	51.155675	1.5581554024714852	2.276979773404444
gzl	2246.0037	1859.9209	878.3546	1063.3453	5.29222	7.24376	0.0	2.46899	1067.48	1047.61	1441.99	2434.42	2052.9623	970.84995	1938.205	1057.545	0.4729019865586426	0.5456311380891082
Rm62	29008.5683	17251.0505	7684.0503	7883.902	566.5785	1194.7625	10.43537	6.95154	8722.9497	7657.097	20471.455	40695.252	23129.8094	7783.97615	30583.3535	8190.0233499999995	0.33653438363396115	0.2677935024358921
TfIIFalpha	3025.65	1953.0	1254.57	1362.3	5.39211	3.23746	4.35491	0.0	1731.43	1576.7	1566.61	3042.76	2489.325	1308.435	2304.685	1654.065	0.5256183905275527	0.7176967785185394
CG10283	705.66916446	338.4102	60.4723	43.02056	4.7995	24.4361	0.0	0.0	53.19920519958	60.5382	343.48743	854.794902	522.03968223	51.746430000000004	599.141166	56.86870259979	0.09912355662112594	0.09491703429336718
CG10286	1986.0	1271.0	343.562	383.965	2.0	3.00376	0.0	1.00073	940.438	867.035	1799.0	3414.0	1628.5	363.7635	2606.5	903.7365	0.22337334970832054	0.34672415116056016
Gasp	77.0	29.0	28.89645	45.52625	1.47353	0.0	0.0	0.0	19.10357	21.47374	16.52647	11.0	53.0	37.211349999999996	13.763235	20.288655	0.7021009433962263	1.4741196382972461
fmt	2993.21	2756.853	1994.3258	2353.604	251.484	326.32361	155.732000116347	129.915873699	2469.841	2305.2082	2880.3422	4701.257	2875.0315	2173.9649	3790.7996	2387.5245999999997	0.7561534195364468	0.6298208430749016
how	1211.2982	1117.3492	746.506	913.1108	30.0096	41.6628	225.702454923	194.65048438	1212.49400466242	1121.89000046789	1124.99052	1970.337	1164.3237	829.8084	1547.66376	1167.192002565155	0.7126956189245311	0.7541638130527493
Pak	2719.4868	2300.942	1430.35049	1520.08011	14.96226	22.74375	5.5156	1.05887	1479.64874	1317.92236	1878.0358	3101.2585	2510.2144	1475.2153	2489.64715	1398.78555	0.5876849802152359	0.5618408817490463
CG10298	11.0	0.0	2.07396	2.11753	2.12981	2.0	0.0	0.0	52.0938	31.897	28.6423	49.0036	5.5	2.095745	38.82295	41.995400000000004	0.38104454545454547	1.0817158407591387
bsf	4219.96	3288.0	1056.58	1137.13	2.05092	5.14665	2.04379	0.0	816.418	858.871	2428.95	4054.85	3753.98	1096.855	3241.8999999999996	837.6445	0.29218456145211213	0.2583807335204664
RpS26	47549.7702	21807.95	7710.4691	8105.2235	68.33277	198.25357	21.2291	9.00396	8079.54	7565.78	18474.7	40142.7	34678.8601	7907.8463	29308.699999999997	7822.66	0.22803074487445452	0.26690573106279025
eIF3k	3138.86	1729.7	867.584	861.021	1.08427	2.12099	16.1421	3.29727	1335.42	1228.98	2000.92	3646.88	2434.28	864.3025	2823.9	1282.2	0.3550546773583975	0.45405290555614575
CG10307	46.0	17.0	7.0	7.0	1.0	4.0	7.0	2.0	13.0	8.0	18.0	58.0	31.5	7.0	38.0	10.5	0.2222222222222222	0.27631578947368424
CycJ	1359.364	935.48043	329.079313	313.16643	0.0	1.02467203	21.63589	17.5195	945.1754	744.8491	1182.2994	1960.6274	1147.422215	321.1228715	1571.4634	845.01225	0.2798646106917147	0.537723150281451
pad	355.0	513.0	392.335	399.49	54.3249	80.7326	0.0	0.0	439.665	363.51	401.675	521.267	434.0	395.9125	461.471	401.5875	0.9122407834101383	0.87023344912248
CG10311	42.0	28.0	17.5551	22.4159	0.0	1.0	0.0	0.0	29.4449	33.5841	17.0	25.0	35.0	19.985500000000002	21.0	31.514499999999998	0.5710142857142858	1.500690476190476
eIF2Bdelta	1934.781	1682.941	933.0445	910.6771	1.07768	1.0823326449	56.2154	46.0552	559.95578	542.323000177971	772.9225	1317.918	1808.8609999999999	921.8607999999999	1045.42025	551.1393900889855	0.5096360637992637	0.527194102169903
NC2alpha	819.381	756.389	533.624	562.26	0.0	0.0	145.619	138.611	912.376	870.74	862.0	1528.0	787.885	547.942	1195.0	891.558	0.6954593627242555	0.746073640167364
ND-B12	1337.9757	744.9959	320.4936	418.573	6.08434	3.0565	2.02512	1.00471	385.5066	386.4264	673.9159	1220.944	1041.4858	369.5333	947.42995	385.9665	0.3548135749906528	0.4073826249634604
CG10321	1478.1	1549.724	974.646	1081.506	3.24628	4.32978	54.9005	36.2769	1144.35	1138.49	1471.75	2556.67	1513.9119999999998	1028.076	2014.21	1141.42	0.6790857064347202	0.566683712224644
CG10324	374.139	302.0	301.587	303.85	2.03104	2.04511	0.0	0.0	320.612	292.348	258.969	449.955	338.0695	302.7185	354.462	306.48	0.895432743858881	0.8646342908407673
abd-A	104.1276	85.91649	198.04090067869	175.9435	1.15126	0.0	6.87242	3.08351	202.959	202.057	64.8487	192.0	95.02204499999999	186.992200339345	128.42435	202.50799999999998	1.9678822986744289	1.5768660694019474
Arl6IP1	1460.78	992.0	763.225	775.601	7.00679	2.00346	65.0762	54.0	1163.58	1067.2	1151.99	1949.0	1226.3899999999999	769.413	1550.495	1115.3899999999999	0.6273803602442943	0.719376715178056
TBPH	1052.9041	725.8221	380.4481	449.539315497	31.4893	41.7073	1.096050318132	2.177610774284	433.247	438.99	686.384	1233.485	889.3631	414.9937077485	959.9345	436.11850000000004	0.4666189858208644	0.4543211021168632
nonA-l	1023.9999	1309.004	829.7498	715.506	3.0	4.0	0.0	0.0	310.251	259.494	50.0	52.0	1166.5019499999999	772.6279	51.0	284.8725	0.6623459995073305	5.585735294117647
CG10333	965.0	946.992	726.486	756.707	0.0	0.0	0.0	1.00845	810.514	828.293	853.0	1451.0	955.996	741.5965	1152.0	819.4035	0.775731802225114	0.7112877604166666
spi	841.6812	617.9191	479.6995	418.075	2.038010197976	1.0426200323501	6.31834	2.08091	482.3009	387.9252	590.9624	1041.9572	729.80015	448.88725	816.4598000000001	435.11305000000004	0.6150824304434577	0.5329264833369628
Pbgs	206.1977	222.2211	102.26477	153.042	0.0	0.0	2.09944	0.0	397.235	342.025	502.381	693.549	214.20940000000002	127.653385	597.9649999999999	369.63	0.5959280265011713	0.6181465470387063
CG10336	1158.9714	902.975	628.268	640.306	0.0	1.01983	1.02403	1.02547	745.732	742.694	779.0	1317.98	1030.9732	634.287	1048.49	744.213	0.6152313173611109	0.7097950385792902
CG10337	312.933	126.344	39.05	23.4302	0.0	0.0	0.0	0.0	98.0	62.0348	221.173	287.0	219.6385	31.240099999999998	254.0865	80.0174	0.14223417114941142	0.31492188683775013
CG10338	513.0	579.989	380.203	465.912	0.0	1.01105	0.0	0.0	422.376	490.088	603.0	834.989	546.4945	423.0575	718.9945	456.23199999999997	0.7741294743130992	0.6345417106806797
bcd	2314.77479	2509.50465	1395.00362	1450.51619	2.0342194392955	3.0371041863651	21.23049752	27.49844156	1741.995	1507.4865	2280.964	3489.95703	2412.13972	1422.759905	2885.4605149999998	1624.74075	0.589833123348261	0.5630784900898219
CG10340	1009.6	538.648	268.425	251.048	0.0	1.00367	55.4048	29.3518	407.575	419.952	620.0	1125.0	774.124	259.7365	872.5	413.7635	0.335523120326976	0.4742275071633238
CG10341	1288.0017	782.0	290.492	200.516	1.001358	2.00976	0.0	0.0	309.508	292.484	776.999	1516.9951	1035.00085	245.50400000000002	1146.99705	300.996	0.23720173756379045	0.26242090160563186
CG10343	947.982	586.0	292.267	269.112	2.06326	1.02942	2.01804	0.0	298.733	278.888	419.937	723.971	766.991	280.6895	571.954	288.8105	0.3659619213263259	0.5049540697328806
CG10344	396.6277	233.7368	126.379	150.646	0.0	1.00416	11.9227	13.3334	246.045	214.056	287.386	520.433	315.18225	138.5125	403.9095	230.0505	0.4394679586175934	0.5695595176642293
Grip71	2080.17	2358.59	1638.12	1585.78	0.0	2.06293	2.1002	1.05311	1834.82	1668.24	2042.0	3060.94	2219.38	1611.9499999999998	2551.4700000000003	1751.53	0.7263064459443628	0.6864787749806973
CG10347	692.0	557.0	279.308	329.0	1.0	1.0	0.0	0.0	667.692	598.0	800.0	1162.0	624.5	304.154	981.0	632.846	0.48703602882305846	0.6451029561671764
CG10353	1126.06170375149	745.497	395.6614	421.2534686	2.21365	5.42804	42.939	27.5022	626.3385	611.747079	674.7861	1282.5720564953	935.7793518757451	408.45743430000005	978.6790782476501	619.0427895	0.4364890435776958	0.6325288884364546
Rat1	3355.143	3112.281	1883.395	1968.673	1.07027	2.1389	12.9717	6.41527	1453.75	1286.69	2520.93	4056.86	3233.712	1926.034	3288.895	1370.22	0.5956108645420496	0.4166201718206267
ref(2)P	5669.7591433	5189.36276	3694.92000231296	3650.67000573327	9.52164	4.26335	4.30669	4.29462	3731.03	3430.86	4667.31	7698.74	5429.56095165	3672.7950040231153	6183.025	3580.945	0.6764441981090539	0.579157451247569
Tep4	832.924	714.99972	717.5678	622.2813225325	4.33454671	2.147864119	1.076761	0.0	1327.428143194	1284.722151682	767.66560423	1816.84709	773.96186	669.9245612662501	1292.256347115	1306.075147438	0.8655782615260267	1.0106935441670306
msb1l	1459.0	1080.0	1001.28	970.814	2.17108	2.12041	0.0	0.0	974.725	941.186	963.829	1655.88	1269.5	986.047	1309.8545	957.9555	0.7767207562032297	0.7313449699947591
CG10365	1082.6731	733.8231	232.5124	258.6050185871	10.0176	7.02661	0.0	0.0	277.5443278	288.07332	627.9820156221	1165.973	908.2481	245.55870929355	896.9775078110499	282.8088239	0.2703652331268846	0.3152908756766443
CG10366	637.872	555.655	458.006	443.304	1.00959	1.00276	52.1279	41.3446	573.994	589.696	633.99	1096.0	596.7635	450.655	864.995	581.845	0.7551651533647751	0.6726570673818925
Hmgcr	690.034	754.105	588.933	653.762	3.41706	4.54493	21.4037	26.8362	913.5707	842.5076	1100.082	1549.888	722.0695000000001	621.3475	1324.9850000000001	878.0391500000001	0.86050927230689	0.662678558625192
Irk3	50.7304	35.35418794	17.06054124	29.98727542	1.999998284	3.999997071	0.0	0.0	7.0	9.0	13.0	18.0	43.04229397	23.523908329999998	15.5	8.0	0.5465300791448499	0.5161290322580645
Rpt5	3801.34	2629.88	1602.82	1762.55	36.4702	37.9605	114.663	71.1174	2597.18	2680.45	2355.53	4173.04	3215.61	1682.685	3264.285	2638.8149999999996	0.5232864060007276	0.8083898924266723
PTPMT1	324.835	201.823	89.5712	102.945	1.03556	6.42312	119.672	83.6923	204.459	187.078	303.693	430.353	263.329	96.2581	367.023	195.76850000000002	0.3655431038738612	0.5333957272432518
Faf2	2770.996	2269.958	1395.3642	1462.5446	45.6124	72.951	0.0	3.04427	1685.64	1625.45	2084.39	3583.05	2520.477	1428.9544	2833.7200000000003	1655.545	0.5669380835452973	0.5842302697514221
Jwa	2591.0	1485.0	866.982	903.082	3.03821	1.01902	0.0	0.0	880.018	863.918	1123.96	1951.98	2038.0	885.0319999999999	1537.97	871.9680000000001	0.43426496565260053	0.5669603438298537
Lsd-1	445.0252	123.29689	27.99998	32.00004	0.0	0.0	19.0398	4.0	26.7155	25.5703	125.32416	317.9548	284.161045	30.00001	221.63948	26.142899999999997	0.10557397126689198	0.1179523611948557
CG10375	536.993	261.4095	188.7686	183.9425	0.0	0.286646	22.5101	8.05104	275.4533	198.9162	388.0985	662.836	399.20125	186.35555	525.46725	237.18475	0.46682105830079434	0.4513787491037738
CG10376	992.0	762.958	503.57	560.11	0.0	1.03923	0.0	1.0422	747.43	765.89	995.0	1644.96	877.479	531.84	1319.98	756.66	0.6060999750421378	0.5732359581205776
mbc	2507.275	2376.665	1499.818	1754.299	1.0509900341748	6.324910238451	42.7285224232	42.33320196291	1807.185	1732.708	2544.9497	4503.6694	2441.9700000000003	1627.0585	3524.30955	1769.9465	0.6662893074034488	0.502210851484371
CG10383	916.0	868.997	590.823	644.2343	2.01444	8.01016	0.0	1.0033	399.177	439.765	435.986	816.99	892.4984999999999	617.52865	626.488	419.471	0.6919100144145901	0.6695595127121349
msl-1	2550.954	3297.815	2897.936	3144.49	31.4429	42.8901	1.04436	4.18772	3184.07	3346.51	3124.56	5011.11	2924.3845	3021.2129999999997	4067.835	3265.29	1.0331107280865426	0.8027095494286273
tos	2094.0	1874.0	1658.73	1699.61	1.16421	2.2615	0.0	0.0	1762.27	1762.39	1599.84	2922.74	1984.0	1679.17	2261.29	1762.33	0.8463558467741936	0.7793471867827656
mia	200.00029	121.0	0.0	5.0	5.0	4.0	0.0	0.0	149.0	74.0	415.99983	685.0001	160.500145	2.5	550.499965	111.5	0.015576309915483253	0.20254315547504168
sxc	4015.62	3839.81	2347.457	2484.225	2.35662	14.1013	2.37979	1.19043	2877.54	2954.78	3930.64	5933.9	3927.715	2415.841	4932.2699999999995	2916.16	0.6150754318986993	0.5912409499074462
CG10395	802.8851	483.9241	351.4588	419.4918	0.0	0.0	2.0024	2.00406	431.541	352.426	624.952	1082.9	643.4046	385.4753	853.926	391.9835	0.5991180355253911	0.4590368486262275
Hmgcl	234.918653	123.72818	47.104100110966	52.2851	2.25845	1.13075	0.0	0.0	131.677	152.82	151.742	285.869	179.3234165	49.694600055483	218.8055	142.24849999999998	0.27712275967864464	0.650113913955545
mRpS33	602.0	268.0	170.404	157.201	1.18589	1.27395	0.0	0.0	117.596	82.7988	216.814	364.726	435.0	163.8025	290.77	100.1974	0.37655747126436784	0.34459332118169
Jhbp5	1665.6801	772.4903	237.0584	159.131	44.0593	25.2146	126.3191	53.510100848753	188.9411	124.869	337.941	454.7858	1219.0852	198.0947	396.36339999999996	156.90505000000002	0.1624945491914757	0.3958616007431565
CRAT	526.9997	420.91119	220.6901	252.4863	2.030744605	0.0	0.0	5.08927	333.31	291.5142	434.9688	680.0003	473.95544499999994	236.5882	557.48455	312.4121	0.4991781453212338	0.5603959786867636
CG10413	2073.767	2163.57	1621.574	1705.044	4.34216	5.51996	2.22869	4.43272	1736.43	1697.96	1672.66	2752.48	2118.6684999999998	1663.3090000000002	2212.57	1717.1950000000002	0.7850727945405336	0.7761087784793249
Atac2	533.0	494.0	316.395	389.742	0.0	0.0	0.0	0.0	381.605	414.258	391.0	793.0	513.5	353.0685	592.0	397.9315	0.6875725413826679	0.6721815878378379
TfIIEalpha	1872.97	1468.72	857.142	865.449	1.026	1.02012	198.029	107.28	1370.86	1222.55	1218.97	2126.98	1670.845	861.2955	1672.975	1296.705	0.5154849791572528	0.7750892870485213
CG10417	2824.514	3002.709	1616.859	1715.665	1.1125	7.84571	4.48621	2.29361	2521.14	2255.339	3154.89	4825.15	2913.6115	1666.262	3990.0199999999995	2388.2394999999997	0.5718888739970994	0.5985532653971659
CG10418	497.0	289.0	146.0	147.0	1.0	0.0	2.0	2.0	159.0	160.0	277.0	516.0	393.0	146.5	396.5	159.5	0.3727735368956743	0.40226986128625475
Gem2	481.189	419.623	336.468	323.8967	0.0	1.03276	4.81025	2.37627	620.532	509.104	653.0	975.967	450.406	330.18235000000004	814.4835	564.818	0.7330771570538581	0.693467700696208
Sil1	560.0	559.997	405.058	471.614	0.0	0.0	0.0	1.00343	376.942	309.386	395.0	558.0	559.9984999999999	438.336	476.5	343.164	0.7827449537811263	0.7201762854144805
bam	487.0	500.0	94.0	129.0	1.0008	0.0	0.0	0.0	661.0	636.0	1229.0	2316.0	493.5	111.5	1772.5	648.5	0.2259371833839919	0.36586741889985896
RpS27	27584.214	13129.698	6124.1722	6326.2186	3725.6501	8103.2873	1.81579	5.31446	3440.83	3062.78	7720.35	16143.7	20356.956	6225.1954000000005	11932.025000000001	3251.8050000000003	0.3058018792200563	0.272527504761346
Naxd	1101.92	597.0	277.768	294.464	0.0	0.0	1.08308	0.0	275.232	298.5359	425.00037	755.0002	849.46	286.116	590.000285	286.88395	0.3368210392484637	0.4862437481703929
Kdsr	971.999	603.998	350.374	402.838	2.00314	1.00261	1.00102	1.00164	592.626	563.162	640.997	1162.0	787.9985	376.606	901.4984999999999	577.894	0.47792730569918596	0.641037117643568
INPP5E	168.603	210.4719	81.55477	82.6354	0.0	1.11475	3.396635	4.528089	175.4455	148.36500261154	203.000291006	274.885000456017	189.53745	82.09508500000001	238.9426457310085	161.90525130577	0.4331338476907862	0.6775904351876813
CG10428	984.956	731.92	542.99	535.92	1.00544	0.0	22.0436	20.0798	556.01	632.08	555.995	982.0	858.438	539.4549999999999	768.9975	594.0450000000001	0.6284146321574766	0.7724927584289938
CG10431	129.8275	146.5573	122.243	125.274	0.0	0.0	0.0	0.0	142.149	161.282	160.257	265.495	138.1924	123.7585	212.876	151.71550000000002	0.8955521432437674	0.7126942445367257
CG10433	252.86619	124.0	98.952	108.1196	3.26604	1.0276	0.0	0.0	126.0477	96.8803	110.734	311.9727	188.43309499999998	103.5358	211.35334999999998	111.464	0.549456559103909	0.5273822250747386
CG10435	1070.27	859.103	628.02	616.824	0.0	0.0	0.0	0.0	619.454	594.09	708.625	1177.24	964.6865	622.422	942.9325	606.7719999999999	0.64520649972815	0.6434946297852708
dos	2904.3349	2434.9816	1706.9263	1780.0684	2.12256	6.41177	196.669	159.022	2347.07	2135.93	2306.88	3885.59	2669.65825	1743.49735	3096.235	2241.5	0.6530788538195854	0.7239437574990271
CG10444	1563.94	1395.94	967.066	1046.37	3.22295	3.19007	1.05647	1.05888	1138.93	1199.63	1462.78	2271.81	1479.94	1006.718	1867.295	1169.2800000000002	0.6802424422611727	0.6261892202356886
CG10445	358.9997247	666.9945	460.000000776339	533.39700128627	0.0	1.0	2.0	4.00579	167.0002	137.603	186.999629	230.9996	512.99711235	496.6985010313045	208.9996145	152.3016	0.9682286489995376	0.7287171335906938
Nf-YB	294.0	166.9998	115.3477	98.2958	1.05508	0.0	0.0	0.0	209.652	157.704	163.945	375.0	230.4999	106.82175000000001	269.47249999999997	183.678	0.46343512513454455	0.6816205735279111
Catsup	1458.0	1052.0	694.971	670.911	2.00223	1.00441	0.0	1.00194	721.029	718.089	876.998	1560.0	1255.0	682.941	1218.499	719.559	0.5441760956175299	0.5905290033065271
zen	40.0	24.0	3.0	4.0	0.0	0.0	22.0	9.0	6.0	5.0	25.0	73.0	32.0	3.5	49.0	5.5	0.109375	0.11224489795918367
cer	391.381	217.754	53.7109	79.609	1.01507	0.0	63.6188	43.1741	193.289	194.391	281.985	419.0	304.5675	66.65995	350.4925	193.83999999999997	0.2188675745113973	0.553050350578115
CG10462	4091.9915	2851.0015	746.14470237842	889.6887136084	46.11	91.0001	1.00346	0.0	492.8559	494.311	723.8902	1614.996	3471.4965	817.91670799341	1169.4431	493.58344999999997	0.23560925612150552	0.4220670933027866
Dus3	794.0	562.0	253.726	257.0	0.0	0.0	0.0	0.0	466.274	427.0	746.0	1377.0	678.0	255.363	1061.5	446.637	0.376641592920354	0.42076024493641073
CG10465	2104.99	1332.0	1002.69	961.2	2.0	4.01223	5.49787	0.0	934.293	834.779	1177.0	1986.99	1718.495	981.945	1581.995	884.5360000000001	0.5713982292645601	0.5591269251799154
CG10466	150.995	135.982	100.312	73.5174	0.0	0.0	1.78504	1.01805	508.5048	387.739	525.191	904.823	143.4885	86.9147	715.0070000000001	448.1219	0.6057258944096565	0.6267377801895645
CG10467	331.62	238.478	134.305	159.735	0.0	0.0	0.0	0.0	182.517	164.997	237.0	365.0	285.049	147.02	301.0	173.757	0.5157709727099552	0.5772657807308971
CG10469	26.3799	32.5223	6.17842	4.26852	0.0	0.0	0.0	0.0	12.0	8.0	40.0	73.0	29.4511	5.22347	56.5	10.0	0.1773607776959095	0.17699115044247787
CG10470	1377.0	748.883	351.094	347.605	1.19202	3.45748	0.0	1.11694	399.906	367.395	627.808	972.543	1062.9415	349.34950000000003	800.1755	383.65049999999997	0.3286629602852086	0.4794579439135539
Acn	3023.906	2567.001	1736.171	1889.072	3.13515	3.13703	2.09099	0.0	2102.831	1942.926	2534.8648	4643.861	2795.4535	1812.6215	3589.3629	2022.8785	0.6484176896521441	0.5635759203952323
CG10479	77.486229486	38.8958	22.9931	16.61587	0.0	0.0	11.5138	7.10424	12.0069	25.3842	40.0	73.0	58.191014743	19.804485	56.5	18.69555	0.3403357904560747	0.33089469026548674
Rcc1	9394.844	6858.244	4055.474	4036.565	4.27317	11.7145	92.1548	89.7526	4434.53	3841.427	6386.73	10053.29	8126.544	4046.0195000000003	8220.01	4137.9785	0.4978770188163628	0.503403098049759
PolE2	505.0	553.0	367.952	376.516	1.0	1.00136	0.0	0.0	387.048	353.484	397.0	737.999	529.0	372.23400000000004	567.4995	370.26599999999996	0.7036559546313801	0.6524516761688776
Pcyt1	1803.063568	1335.1993	587.6487	575.6985	15.23806	10.86551	31.93975	24.800581	933.351	788.3011	1586.76	2963.1354	1569.131434	581.6736	2274.9477	860.82605	0.3706978188036223	0.37839377582174744
vn	16.0702	22.857	28.1425	35.9706	0.0	10.5327	12.9298	12.143	71.3143	60.02935	18.99999	20.46731	19.4636	32.05655	19.73365	65.671825	1.6470000411023655	3.3279107007573354
CG10492	2782.587	3550.612	2824.398	3290.161	3.17711	4.25715	5.41128	4.39101	2767.61	2820.84	3319.82	4898.74	3166.5995000000003	3057.2795	4109.28	2794.2250000000004	0.9654771624892885	0.6799792177705098
Phlpp	7.0	9.0	240.842	162.968	1.0	0.0	0.0	0.0	23.158	6.03184	3.0	4.0	8.0	201.905	3.5	14.59492	25.238125	4.169977142857143
CG10494	373.334	367.6434	228.0368	239.5172	0.0	0.0	3.23356	0.0	290.565	301.271	306.0	508.0	370.4887	233.777	407.0	295.918	0.6309963029911573	0.7270712530712531
Dus4	486.0	451.0	255.0	227.904	0.0	0.0	0.0	0.0	386.0	282.096	482.0	760.0	468.5	241.452	621.0	334.048	0.5153724653148346	0.5379194847020934
TAF1C-like	426.998	524.996	383.311	412.881	1.00901	0.0	1.00229	1.00373	517.689	476.119	571.991	1010.0	475.99699999999996	398.096	790.9955	496.904	0.83634140551306	0.628200792545596
Sdc	3785.4457	2704.0401	1102.7681	1094.23375088094	13.42099	11.0685	317.3331	268.92763	1604.531297	1505.77065	2561.515235	4476.56096	3244.7429	1098.50092544047	3519.0380975	1555.1509735	0.3385479094323528	0.4419250176929919
Cdk2	2346.003	1634.997	1253.7212	1219.2815	1.00424	6.02894	0.0	0.0	183.61	159.071	172.296	238.57	1990.5	1236.50135	205.433	171.34050000000002	0.6212013815624216	0.8340456499199254
amd	270.101	118.90584	18.2251	18.7022	0.0	0.0	33.898892	12.0943	29.77488	35.29783	23.00004	67.99999	194.50342	18.46365	45.500015	32.536355	0.09492712261820384	0.715084489532586
Ilk	1173.893	939.9512	654.7383	694.6311	3.1571	6.34549	2.10854	1.04902	954.262	932.368	1111.84	1693.65	1056.9221	674.6847	1402.745	943.315	0.6383485594633701	0.6724778915626148
GlnRS	3795.92	3047.83	1479.19	1604.64	1.08699	1.09056	1.07962	2.16682	1830.81	1749.36	2707.91	4815.91	3421.875	1541.915	3761.91	1790.085	0.45060529680365297	0.47584471717824195
CG10512	18.00001	10.2278	14.849823	34.653	4.20593	6.2841	0.0	0.0	49.7068	45.347	88.7941	134.716	14.113904999999999	24.7514115	111.75505000000001	47.5269	1.753689818657558	0.4252774259418254
CG10513	31.0	19.0	13.0	24.0	1.0	2.0	0.0	0.0	8.0	14.0	20.0	54.0	25.0	18.5	37.0	11.0	0.74	0.2972972972972973
CG10514	78.0	54.0	9.77949	30.3791	0.0	0.0	0.0	0.0	79.2205	66.6209	51.0	132.0	66.0	20.079295000000002	91.5	72.92070000000001	0.30423174242424245	0.7969475409836067
CG10516	166.104	178.755	133.877	126.185	1.04922	1.05367	11.8955	5.24513	186.123	143.815	199.951	286.946	172.42950000000002	130.031	243.44850000000002	164.969	0.7541111004787463	0.6776340786655082
tub	1413.98	1173.99	357.716	410.575	1.00089	3.00604	2.01802	2.00664	1174.28	1053.42	1152.0	2043.99	1293.9850000000001	384.14549999999997	1597.995	1113.85	0.29687013373416227	0.697029715362063
NetB	67.632	39.8196044	89.67770425134	111.340812	0.0	0.0	3.36798	1.18038	90.3223	104.659	36.0	85.0	53.725802200000004	100.50925812567	60.5	97.49065	1.8707818964063787	1.611415702479339
sti	862.622	1521.54	795.9185384	1070.557	1.0464183	4.186702	44.3776	105.461	1727.991	1802.441	2226.955	2845.811	1192.081	933.2377692	2536.383	1765.216	0.7828643936108369	0.6959579842634176
park	227.0	240.0000030236	88.00820447362	120.3550136301	0.0	1.09062	0.0	0.0	119.992	104.487	200.862	308.835	233.5000015118	104.18160905186	254.8485	112.23949999999999	0.4461739116802324	0.4404165612118572
CG10527	1671.45	1208.0	697.887	670.362	1.46412e-06	5.00286	180.55	149.0	936.113	862.638	1353.0	1869.0	1439.725	684.1244999999999	1611.0	899.3755000000001	0.4751772039799267	0.5582715704531348
Elp1	1901.77100008391	1623.8319	686.2176805303	810.5944	0.0	4.24767	3.226337	2.172607	1078.7851	1113.410289803	1668.9972	3091.748	1762.801450041955	748.40604026515	2380.3726	1096.0976949015	0.42455492661827443	0.46047316075705963
CdGAPr	1147.31820002607	1507.401	1075.39140004089	1176.1210231558	3.24574	16.1704	9.6824385072	7.6012631071	1539.609	1728.875	1790.756	2674.831	1327.359600013035	1125.756211598345	2232.7935	1634.242	0.8481169771833419	0.7319270680427903
S6k	3054.588	2932.541	1490.226	1712.528	93.1217	152.152	154.072	127.299	1791.66	1548.47	2607.35	4284.92	2993.5645000000004	1601.377	3446.135	1670.065	0.5349398685079275	0.48461972615698456
cpa	2623.13	1997.23	1290.09	1340.21	1.34832	5.46459	101.516	81.8958	1593.67	1529.35	1806.73	3127.32	2310.1800000000003	1315.15	2467.025	1561.51	0.5692846444865768	0.6329526453927301
Bre1	2244.419	2566.853	2290.673	2605.647	14.9482	26.3686	76.5807	117.147	3185.33	3264.36	2855.05	4727.63	2405.636	2448.16	3791.34	3224.8450000000003	1.017676822262387	0.8505818523266181
CG10543	1689.16249147	1853.3643	1221.3234	1235.53807	38.4411	80.559674	5.83803	16.6362	1170.674021567	1172.4627	1656.558	2714.73313	1771.263395735	1228.430735	2185.645565	1171.5683607834999	0.6935336313943601	0.5360285215244861
Gbeta13F	7246.5195	5982.199	3437.1275	3775.978	163.6323	282.4589	38.47728	23.7992	3519.8725	3114.0251	5032.3662	8046.5433	6614.3592499999995	3606.55275	6539.454750000001	3316.9488	0.5452610923726285	0.5072210034024626
CG10555	2221.06	1778.56	997.93185	1021.4613	2.17327	1.08679	164.944	104.753	1762.07	1409.54	2326.83	4307.19	1999.81	1009.696575	3317.0099999999998	1585.8049999999998	0.5048962526440012	0.47808267083909906
CG10559	10.0	5.0	3.0	2.0	0.0	0.0	0.0	0.0	43.0	31.0	88.0	173.0	7.5	2.5	130.5	37.0	0.3333333333333333	0.2835249042145594
CG10561	191.0	226.0	158.0	141.998	4.05042	1.0071	0.0	2.0	232.0	217.002	240.95	431.993	208.5	149.999	336.4715	224.501	0.7194196642685851	0.6672214437181159
l(2)37Cd	588.0	509.0	382.0	450.468	2.01945	0.0	0.0	0.0	321.0	286.532	316.981	556.0	548.5	416.23400000000004	436.4905	303.76599999999996	0.75885870556062	0.6959280900729797
CG10565	6321.42	4697.01	2376.56	2531.08299	5.76155	13.9036	20.5773	15.9906	2983.44	2745.92	4173.24	7212.1	5509.215	2453.821495	5692.67	2864.6800000000003	0.4454031100619598	0.5032225651583528
MED31	1015.0009	660.8678	446.226	492.5884	0.0	6.25711	0.0	3.1323	569.7735	519.4107887	618.0003	1141.742	837.93435	469.4072	879.87115	544.59214435	0.5601956764273955	0.6189453357460352
Cdk8	326.768	300.713	232.108	230.385	1.01128	0.0	7.23151	4.28685	415.892	308.78	367.989	491.113	313.7405	231.2465	429.551	362.336	0.7370629548942518	0.8435226550514375
ko	178.4109	114.0	47.0127	36.4174	1.20875	1.26709	3.58951	0.0	40.9873	30.5826	140.791	199.733	146.20544999999998	41.715050000000005	170.262	35.784949999999995	0.2853180233705379	0.21017578790334893
I-2	1327.1731	958.84135	644.199	653.9932	0.0	1.52019	235.826	180.159	1077.80283	963.007	1050.99904	1702.4794	1143.007225	649.0961	1376.73922	1020.4049150000001	0.5678845118411215	0.7411751624247329
Ppat-Dpck	757.337	552.122	414.092	399.303	0.0	0.0	9.66202	3.21023	755.299	667.187	958.0	1686.9	654.7294999999999	406.6975	1322.45	711.2429999999999	0.6211687422057507	0.5378222239026049
CG10576	19306.7832	11197.8872	4603.69	4810.4944	5.20036	19.9191000959287	8.21803	4.10682	6158.31	5432.51	11399.8	20752.1	15252.335200000001	4707.092199999999	16075.949999999999	5795.41	0.30861452612187534	0.3605018676967769
DnaJ-1	3358.992	3126.0031	2251.2333	2325.4644	7.00389	11.0057	3.00334	3.0018	3421.76	2813.53	3843.0	7261.99	3242.49755	2288.34885	5552.495	3117.6450000000004	0.7057364931547905	0.5614854223191557
Eip63E	1707.843054411	1491.66074	918.0769	991.478654234	1.949132	4.32933	84.1568	71.3394	1143.9235	998.52232	1582.0529	2719.6667	1599.7518972055	954.777777117	2150.8598	1071.22291	0.5968286574842248	0.49804404266610025
rpk	4734.4101	3433.23	1744.94	1807.5531	2.063161418	2.736756664	2.05801	5.12342	1041.37	983.37	1689.94	2279.77	4083.8200500000003	1776.24655	1984.855	1012.3699999999999	0.43494731115784596	0.5100473334324169
fng	264.504	127.499	40.5588	55.0204	1.49204	0.0	20.49578	11.50142	61.44125	63.9796	172.50788	303.99956	196.00150000000002	47.7896	238.25372	62.710425	0.24382262380645042	0.26320858704745514
CG10581	76.0	51.0	16.0	11.0	1.0	1.0	0.0	0.0	5.0	10.0	23.0	33.0	63.5	13.5	28.0	7.5	0.2125984251968504	0.26785714285714285
Polr3E	888.871	749.0	408.368	440.858	0.0	0.0	1.12939	0.0	461.632	481.142	634.0	1051.0	818.9355	424.613	842.5	471.387	0.5184938252157831	0.5595097922848664
Sse	539.0	573.0	459.282	506.858	0.0	0.0	0.0	0.0	619.718	596.142	641.0	930.0	556.0	483.07	785.5	607.9300000000001	0.8688309352517986	0.7739401654996818
CG10584	377.0	268.0	233.388	214.171	0.0	0.0	0.0	0.0	159.612	182.829	204.0	401.0	322.5	223.77949999999998	302.5	171.22050000000002	0.6938899224806201	0.5660181818181819
Pdss2	930.766	619.0	359.955	410.559	0.0	1.1976	1.23428	0.0	392.045	362.441	603.0	1060.8	774.883	385.257	831.9	377.243	0.49718086472409384	0.45347157110229597
Karybeta3	19114.825	14471.2607	5250.7407	6102.2407	1245.95	2179.65	64.1646	59.7096	5077.26	4730.76	13343.1	22107.3	16793.04285	5676.4907	17725.2	4904.01	0.33802633332767323	0.27666881050707465
TM9SF3	1029.26	1149.87	698.488	732.731	11.0954	3.45052	75.7419	72.1329	1051.51	921.269	1387.9	1894.55	1089.565	715.6095	1641.225	986.3895	0.65678458834489	0.6010080884705022
Acer	2063.318	1296.257	605.485	868.743	104.044	143.907	102.32	54.4807	747.493	897.013	786.816	1261.87	1679.7875000000001	737.114	1024.3429999999998	822.253	0.4388138380598736	0.8027125679581939
spo	146.5644	60.87017153	7.32099	3.13077	0.0	1.0	11.0	1.0	34.0	38.0	119.0	155.0	103.717285765	5.22588	137.0	36.0	0.05038581526169771	0.26277372262773724
Msr-110	995.839905685	569.8839000165	460.14240027	390.6716578	23.1279600372491	12.92963465938	0.0	1.5154412909	525.7785	458.3179	264.8561	678.8583	782.86190285075	425.407029035	471.85720000000003	492.0482	0.5433998352530669	1.0427904883087509
CG10600	1720.2915	2167.8519	1726.4664	1707.9553	8.32856	10.4804	16.7105	25.14375	2280.5292	2229.0372	2160.673	3502.5192	1944.0717	1717.21085	2831.5960999999998	2254.7832	0.8833063358722829	0.796294075980681
mirr	173.4588	135.6968	30.3651354	29.278707983	15.5262	30.33488	8.54127	8.30325	27.6348	26.7212	117.474	220.665	154.5778	29.821921691500002	169.0695	27.177999999999997	0.19292499758374101	0.16075046060939435
ECSIT	477.0	345.0	224.0	211.476	0.0	0.0	0.0	0.0	226.0	238.524	261.0	456.0	411.0	217.738	358.5	232.262	0.5297761557177616	0.6478716875871687
CG10616	625.834	657.62356673	453.703	531.8963	5.22975	3.20516	41.1657	46.3761	798.297	803.103	812.77	1014.79	641.728783365	492.79965	913.78	800.7	0.767925115367168	0.8762503009477117
CHKov1	0.0	3.0	1.0	0.0	1.0	1.0	0.0	0.0	43.0	42.0	62.0	97.0	1.5	0.5	79.5	42.5	0.3333333333333333	0.5345911949685535
Tsf2	1676.49	1526.83	1270.19	1325.74	4.34334	4.2964	12.514	27.1723	1587.81	1639.26	1721.66	2598.7	1601.6599999999999	1297.9650000000001	2160.18	1613.5349999999999	0.8103873481263191	0.7469446990528567
CG10621	23.0	21.99996	19.88938	13.6255	1.0	2.66954	0.0	0.0	1.11063	12.3745	8.0	9.33046	22.49998	16.75744	8.665230000000001	6.742565	0.7447757731340205	0.7781172571299318
ScsbetaG	1062.0046	734.9946	289.8366	290.3049	1.00603	2.0189	0.0	1.00532	377.164	387.695	687.994	1209.98	898.4996	290.07075	948.9870000000001	382.42949999999996	0.3228390418871639	0.40298707990731164
Bhmt	1561.3183	795.737	200.40796	230.482	3.30476	0.0	7.68146	2.26255	204.592	243.518	1059.7	1928.0	1178.52765	215.44498	1493.85	224.055	0.18280859172035546	0.14998493824681194
sinu	380.297	354.541	127.75	133.543	1.139	1.099	6.70273	3.45891	96.2501	95.4567	263.861	458.901	367.419	130.6465	361.381	95.8534	0.3555790527980317	0.2652419468649431
nst	1796.74	1535.26	632.764	649.62	0.0	1.11628	8.25859	5.74438	594.236	626.38	1107.0	1939.88	1666.0	641.192	1523.44	610.308	0.3848691476590636	0.40061177335503856
CG10628	1091.99	617.0	320.135	349.782	0.0	1.00829	1.00609	0.0	309.865	315.218	371.0	771.992	854.495	334.95849999999996	571.496	312.54150000000004	0.3919958572022071	0.5468830927950503
Itpr	1971.879	1323.00002977	843.66632341	1075.8880110141	2.0782796	4.1474250102017	2.11987	0.0	1099.33000112006	1225.11000013723	1760.92001201945	3645.852931525	1647.4395148849999	959.77716721205	2703.386471772225	1162.2200006286448	0.5825871957909469	0.4299126346765888
blanks	26.0	14.0	2.0	7.0	3.0	2.0	0.0	0.0	47.0	63.0	2.0	2.0	20.0	4.5	2.0	55.0	0.225	27.5
CG10631	1723.92	1698.93	1087.06	1492.73	2.1561	2.16135	1.07757967	1.07066302	942.93896981	1066.2689022359	1277.84358	2179.840149853	1711.4250000000002	1289.895	1728.8418649265	1004.6039360229499	0.7536964810026732	0.581084919565885
sowah	779.6863	653.7169	410.42862	483.4107	28.1657	26.0248	36.31357	22.28265	533.571	487.588860019142	730.83434	1141.975	716.7016	446.91966	936.4046699999999	510.579930009571	0.6235784320838687	0.5452556425306712
Pfdn4	1261.0	708.0	440.964	446.0	0.0	1.0	0.0	0.0	560.036	509.0	672.0	1277.0	984.5	443.48199999999997	974.5	534.518	0.45046419502285423	0.54850487429451
Nak	2120.736	2216.9506724	1472.1003734802	1556.27280054346	6.35482	11.15303	42.2613	61.0524	1668.898	1577.726	1900.641	2603.851	2168.8433361999996	1514.18658701183	2252.246	1623.312	0.6981539707080988	0.7207525288090199
CG10638	1365.3618	699.4706	461.4698	470.2206	2.10338	2.14375	54.63272	29.52986	866.84961	731.77936	1291.0674	2142.8438	1032.4162	465.8452	1716.9556	799.314485	0.4512184136591425	0.46554173270409555
L2HGDH	339.80331	298.6308	197.0057	217.3862	2.06217	6.31338	2.19687	4.36875	250.994	236.614	447.938	748.687	319.217055	207.19594999999998	598.3125	243.804	0.6490754386541157	0.407486054528361
Snr1	2071.95	1466.98	978.58	1030.87	1.01206	2.02198	3.0538	1.02201	975.42	874.132	1187.99	2045.98	1769.465	1004.7249999999999	1616.9850000000001	924.776	0.5678128699917772	0.5719137778025151
Uev1A	6399.998	4289.189	2426.1954	2407.085	2.78095	4.245883862	0.0	3.81082	2510.8	2069.92	3619.22	5796.75	5344.5935	2416.6402	4707.985	2290.36	0.45216538919190014	0.48648413280840963
Swip-1	1121.173	950.383	577.3072	637.078	6.46153	5.4354	0.0	1.05957	776.301	827.365	1121.28	1719.07	1035.778	607.1926	1420.175	801.8330000000001	0.5862188615707227	0.5646015455841711
Klp64D	382.619	559.549	457.083	448.486	2.06109	2.07315	19.3811	15.4512	150.917	152.514	202.939	284.927	471.084	452.7845	243.933	151.71550000000002	0.9611544862487369	0.6219556189609443
CG10646	258.041	237.309	167.139	166.329	1.05278	0.0	0.0	0.0	195.451	192.946	200.727	299.778	247.675	166.734	250.2525	194.1985	0.6731967295851419	0.7760102296680352
Rbm13	3045.932	1871.001	852.85	842.469	44.048	96.4677	4.07084	0.0	639.149	545.532	1244.95	2486.53	2458.4665	847.6595	1865.7400000000002	592.3405	0.34479196686226965	0.3174828754274443
Scsalpha1	6559.29	3954.63	1610.29	1746.3178	1.43218	2.92609	11.7075	16.3741	2094.71	1873.68	3792.57	6362.07	5256.96	1678.3038999999999	5077.32	1984.1950000000002	0.3192536941502313	0.3907957347577069
RpL30	13395.0406	6011.2867	1042.949	1054.439	18.2796	12.9616	11504.993	5231.295	5488.24	5756.08	11078.72	22888.08	9703.16365	1048.694	16983.4	5622.16	0.10807753407312674	0.33103854351896556
hook	1040.0	874.0	583.068	553.683	0.0	0.0	0.0	0.0	642.932	576.317	745.0	1221.0	957.0	568.3755	983.0	609.6245	0.5939137931034483	0.6201673448626653
CG10654	1368.36	652.657	77.3524	90.7107	0.0	0.0	8.13245	0.0	15.0	12.1469	151.0	317.0	1010.5084999999999	84.03155000000001	234.0	13.573450000000001	0.0831576874415208	0.05800619658119659
l(2)37Bb	1311.0	882.0	438.491	451.494	0.0	0.0	0.0	2.0	468.509	476.506	726.0	1027.0	1096.5	444.9925	876.5	472.5075	0.40582991336069313	0.5390844266970907
CG10660	46.02670106563	21.51132	6.592200768112	14.765703750329	1.270460371102	1.06243	1.092010561	0.0	6.4078	4.75932	24.7295	45.9376	33.769010532815	10.6789522592205	35.33355	5.58356	0.3162352728352298	0.1580243140018481
COX4	7318.472	3459.9809	1791.64751	1945.395451	8.32527	2.31532	2.5234	5.01693	1641.3608	1618.6	2659.6708	5432.6808	5389.22645	1868.5214805	4046.1758	1629.9804	0.3467142265844108	0.4028446811431179
Orc1	2574.49	3346.25	2589.08	2707.5	15.7869	18.9646	10.5782	21.0685	2781.29	2879.74	2905.21	4023.04	2960.37	2648.29	3464.125	2830.515	0.8945807449744457	0.8170937827012593
CG10669	283.9998	331.0	215.4614	228.445	0.0	0.0	0.0	0.0	277.539	299.555	260.0	444.0	307.4999	221.95319999999998	352.0	288.547	0.7217992591217102	0.8197357954545456
Gen	327.0	334.0	224.381	247.679	1.01834	1.01223	0.0	0.0	239.619	217.321	223.982	417.988	330.5	236.03	320.985	228.47	0.714160363086233	0.7117778089318815
Fitm	1139.78234	950.193	598.983	713.083	0.0	0.0	1.15637	0.0	571.017	471.268	637.07	1105.71	1044.98767	656.0329999999999	871.3900000000001	521.1425	0.6277901824430138	0.5980588485064092
Dhrs4	745.781	481.0	262.399	305.806	1.10411	0.0	3.21918	0.0	147.601	144.1944	225.896	382.0	613.3905	284.10249999999996	303.948	145.8977	0.46316742760117735	0.4800087514969666
Tcs5	431.0	196.0	54.0	78.0	0.0	1.0	0.0	0.0	119.0	132.0	240.0	412.0	313.5	66.0	326.0	125.5	0.21052631578947367	0.38496932515337423
CG10674	643.726	341.26	189.045	197.588	0.0	0.0	0.0	0.0	345.848	296.568	454.0	841.0	492.493	193.3165	647.5	321.20799999999997	0.39252639123804806	0.49607413127413125
CHKov2	22.0	18.0	24.0	17.3216	0.0	0.0	0.0	0.0	34.0	47.67837	36.0	79.0	20.0	20.660800000000002	57.5	40.839185	1.0330400000000002	0.7102466956521739
Nedd8	1047.775	707.734	439.272	484.437	1.02013	4.114436	5.22526	6.26523	742.728	659.563	828.98	1370.89	877.7545	461.85450000000003	1099.935	701.1455	0.5261773081197534	0.6374426670666903
CG10681	113.4016	68.3165	80.1426	56.6815	0.0	0.0	8.557708	3.3742462	95.2673	87.0434	92.2202	129.222	90.85905	68.41205	110.7211	91.15535	0.7529470096814791	0.8232879731144289
vih	3279.74	2406.21	1858.89	1846.91	6.77191	6.9195	533.77	388.13	3197.76	2778.23	3198.23	5144.08	2842.975	1852.9	4171.155	2987.995	0.6517468496909048	0.7163471508491054
rhi	794.0	547.0	7.0	59.0	0.0	38.0	0.0	0.0	814.0	879.0	1196.0	1987.0	670.5	33.0	1591.5	846.5	0.049217002237136466	0.5318881558278353
Polr1D	558.9806	231.9997	71.75169	70.65738	0.0	3.02402	2.01948	0.0	30.2483	18.3427	120.0	279.976	395.49014999999997	71.20453499999999	199.988	24.2955	0.180041234908126	0.12148478908734524
tral	69650.185836	46223.5202847	32059.38457	35661.4871	74.62172569	216.263131	99.772576380025	91.534475452353	37677.6197	37320.55763	44336.36169	76974.6679	57936.85306035	33860.435835	60655.514794999996	37499.088665	0.5844369178928174	0.6182304905289693
AsnRS	5151.629	3145.6289	1482.4594	1490.6327	4.85422	4.74067	33.3746	37.3706	1628.54	1609.37	3532.15	6441.26	4148.62895	1486.54605	4986.705	1618.955	0.3583222476428025	0.3246542556658154
Pmm2	556.0	277.926	162.627	202.258	0.0	0.0	0.0	1.07431	250.373	268.742	412.0	632.0	416.96299999999997	182.4425	522.0	259.5575	0.43755081386118194	0.49723659003831416
l(2)37Cb	496.742	533.591	345.077	372.687	0.0	0.0	19.2577	17.4091	403.923	426.313	607.0	888.0	515.1665	358.882	747.5	415.118	0.6966330302921482	0.5553418060200669
Phb1	6273.39345	3788.529	1940.469	1991.536	3.319779	9.81461	644.607	378.475	2259.53	2180.47	3340.68	5957.19	5030.961225	1966.0025	4648.9349999999995	2220.0	0.39078069022485856	0.47752872432073157
Mt2	140.0	83.9255	16.0	12.0	0.0	0.0	12.0	7.07455	51.0	51.0	90.0	205.0	111.96275	14.0	147.5	51.0	0.12504158749226862	0.34576271186440677
slo	12.00001	5.00000161692	13.1756	24.244015086	0.0	1.30534117211	0.0	0.0	21.82441	26.75597	10.00000205	15.694663029	8.50000580846	18.709807543	12.847332539500002	24.290190000000003	2.201152324434679	1.8906796352720032
Pat1	1923.973	1462.983	497.2844	484.7931	1.0	3.0019	25.0276	11.0164	1148.72	1280.21	2024.0	3060.0	1693.478	491.03875	2542.0	1214.4650000000001	0.28995874171379843	0.47775963808025185
Alh	2788.685	3452.5105	2370.54839	2367.99190004835	28.2754256684334	53.817483456728	33.85348	38.48505129	2418.23601	2283.83068	2930.97949	4346.18385	3120.59775	2369.270145024175	3638.5816700000005	2351.033345	0.7592359973419115	0.6461400507742346
Moe	11501.76399	8533.78493002791	4638.261	5101.145548	426.7105	908.780308932	5.23133	5.2180004	4815.74130662094	4426.8586115689	6895.2738261889	12314.2140160259	10017.774460013956	4869.703274	9604.7439211074	4621.29995909492	0.48610629970134267	0.48114764922978787
CG10702	1094.788	1191.391	90.238	90.50562541	25.599914462	20.4036381962	0.0	2.03463	407.829	291.872	1354.49	2227.41	1143.0895	90.371812705	1790.9499999999998	349.8505	0.07905926238059224	0.19534353276194202
GCC88	1214.95	938.803	608.658	647.835	0.0	1.08237	39.049	18.1969	618.342	520.165	679.0	1208.92	1076.8765	628.2465	943.96	569.2535	0.583396981919468	0.6030483283189966
SK	35.51095	18.99999	55.03439	66.87724	26.9539	49.67127	2.48904	0.0	184.965900222511	168.12274	56.04611	92.3287206444109	27.255470000000003	60.955815	74.18741532220545	176.5443201112555	2.236461708420365	2.379707115344306
E2f2	2011.0227	1571.65	1216.37	1345.89	2.02339	2.0505	12.5541	11.3506	1050.63	1051.11	1080.98	1988.95	1791.33635	1281.13	1534.9650000000001	1050.87	0.7151811551191936	0.684621473453792
Vps36	382.558	317.844	182.11	200.564	1.09304	0.0	7.44187	2.15572	280.89	202.436	300.907	480.0	350.201	191.337	390.45349999999996	241.663	0.5463633741765442	0.6189290145945677
Chro	3655.9581	3879.86847849	2855.4229011286	3263.4275	8.29516	10.33582	1.041170726	4.128396678	3279.579	3275.567	3031.71	5042.67	3767.9132892449998	3059.4252005643	4037.19	3277.5730000000003	0.8119680485474591	0.8118451199968295
neb	562.847	803.449	481.171	519.916	1.04554	2.09642	17.1528	27.551	624.829	676.084	776.954	1158.9	683.1479999999999	500.5435	967.927	650.4565	0.7327014058447072	0.6720098726453544
brat	3335.7167	4679.673	4199.25208	3892.2709	1941.719178236	2733.750244	91.2857	123.324970348	4846.7465	4468.7341	6138.275	8190.25300029425	4007.69485	4045.76149	7164.2640001471245	4657.7402999999995	1.0094983878325965	0.6501352127593775
Pyroxd1	320.0	206.0	106.772	127.101	1.17213	0.0	0.0	0.0	70.2282	78.8988	108.828	202.0	263.0	116.9365	155.414	74.5635	0.4446254752851711	0.47977337948962134
nesd	585.575	486.8107	287.394	298.452	3.40138	3.34127	21.4247	28.1897	463.606	415.548	726.599	1079.66	536.19285	292.923	903.1295	439.577	0.5463015778744532	0.48672643292019585
flr	4357.717	3359.99833	2324.826	2548.367	3.12963	7.37425	3.83528	0.0	2487.07	2456.47	2591.82	4166.56	3858.8576649999995	2436.5965	3379.1900000000005	2471.77	0.631429482901127	0.7314681920815342
barr	1263.886	1475.903	1409.7472	1486.197	4.0459	5.047	17.1159	18.0931	1566.25	1513.81	1653.95	2126.95	1369.8944999999999	1447.9721	1890.4499999999998	1540.03	1.056995337962157	0.8146367267052819
vls	1356.63	772.004	419.399	405.034	2.1542	0.0	2.12965	0.0	368.58	341.244	781.546	1529.9	1064.317	412.2165	1155.723	354.91200000000003	0.3873061315378783	0.30709088596488954
CG10731	341.0	200.91408	103.44268	91.78958	0.0	0.0	0.0	2.08609	111.557	121.21	137.0	207.0	270.95704	97.61613	172.0	116.3835	0.36026423229306015	0.6766482558139535
cmb	829.3962	934.385200055359	792.501343	950.3729	12.23935	12.21191	14.6031	13.61447	1379.497	1400.624	1261.762	1943.787	881.8907000276795	871.4371215	1602.7745	1390.0605	0.9881464012180292	0.867283888032908
loj	615.069	399.681000763685	233.6900122248	228.0532	1.00346	0.0	97.9307	77.3184	458.311	431.946	626.997	877.0	507.3750003818425	230.8716061124	751.9984999999999	445.12850000000003	0.4550314972922388	0.5919273775147159
CG10737	620.952703335399	579.50564368	380.97295328	391.955496569	4.51114	7.58368	52.24224038	55.6108427	557.70838	622.732731894	716.62272	1092.75874	600.2291735076994	386.4642249245	904.69073	590.2205559470001	0.6438611150238311	0.6524003577963047
CG10738	58.745257146	13.9999914438	26.37529096	24.21683	0.0	0.0	2.254772558	2.000002032	109.624200252	130.783381109414	138.0	444.9996	36.3726242949	25.29606048	291.4998	120.20379068070699	0.6954697652527343	0.4123632012121689
pigeon	1072.8759	1142.839	606.2522	486.285	4.24509	2.09756	2.1249	3.16104	479.748	375.715	884.755	1218.903	1107.85745	546.2686	1051.829	427.7315	0.4930856402148128	0.40665497908880627
CG1074	1317.0	1113.79	690.087	724.0	0.0	3.0	0.0	0.0	602.381	574.858	970.598	1573.38	1215.395	707.0435	1271.989	588.6195	0.5817396813381658	0.4627551810589557
Tgi	1024.173	1039.304	600.7096	497.0689	1.23327	0.0	251.827	170.696	777.291	659.931	1244.767	2118.003	1031.7385	548.88925	1681.3850000000002	718.6110000000001	0.5320042336309055	0.42739229861096656
Tsp3A	314.0005	310.9759	154.0406	216.2611	0.0	0.0	0.0	1.02454	150.96	139.739	165.0	339.0	312.4882	185.15085	252.0	145.3495	0.5925050929923114	0.5767837301587302
Liprin-beta	1790.2215	1713.546	1209.5000268661	1388.660970125	1.12268	4.49644	54.7776	31.4572	1662.5	1663.34	1831.88	2859.5	1751.88375	1299.0804984955498	2345.69	1662.92	0.7415335055739571	0.7089257318742034
CG10747	166.993	139.992	72.6828	81.4796	0.0	0.0	1.00654	1.00783127	91.3172	75.5204	113.0	140.0	153.4925	77.0812	126.5	83.4188	0.502182191312279	0.6594371541501977
robl	777.0	485.0	223.498	230.993	0.0	2.00373	0.0	0.0	247.502	257.007	322.0	587.996	631.0	227.2455	454.998	252.2545	0.36013549920760696	0.554407931463435
SmD1	1702.0	1113.91	541.563	608.81	0.0	0.0	0.0	1.08685	876.437	661.19	1083.0	1917.0	1407.955	575.1865	1500.0	768.8135	0.40852619579460997	0.5125423333333333
Sf3a2	668.293	369.825	185.94	215.175	0.0	0.0	11.7067	4.17453	313.06	283.825	404.0	634.0	519.059	200.5575	519.0	298.4425	0.38638671133724684	0.575033718689788
Cyp4ae1	94.2124	54.0274	41.7431	26.053	0.0	0.295232	0.0	0.0	69.2027	44.4957	87.0	172.936	74.1199	33.89805	129.96800000000002	56.849199999999996	0.45734074115048723	0.4374092084205342
Taf13	332.438	196.544	135.826	115.739	0.0	1.0024	58.5622	37.4556	251.174	210.261	200.0	443.998	264.491	125.7825	321.999	230.7175	0.4755643859337369	0.7165162003608706
mRpS18B	829.0	433.0004	251.0	261.4916	7.0	20.0	0.0	0.0	296.0	272.509	420.0	738.0	631.0002	256.24580000000003	579.0	284.2545	0.4060946414913974	0.49094041450777204
Gbeta5	319.336	392.149	71.2589	62.586	1.08272	2.06639	20.6638	36.8509	184.741	156.414	90.9173	122.934	355.7425	66.92245	106.92564999999999	170.5775	0.18812048040366275	1.5952907464205268
CG1077	1134.72	460.776	55.0444	230.964	0.0	0.0	10.2841	6.22396	50.9556	237.036	60.0	217.0	797.748	143.0042	138.5	143.9958	0.1792598665242658	1.0396808664259929
Fur1	2678.7702	2231.8814	1450.1282	1544.07173	415.16975942	684.022110173873	31.2292	7.11776	1495.8737	1492.9313	1842.8279	2888.9776	2455.3258	1497.0999649999999	2365.90275	1494.4025000000001	0.6097357690779773	0.6316415583861171
wit	162.406	164.4096	25.9206	21.0746	0.0	0.0	0.0	0.0	487.152	390.925	674.445	1017.81	163.4078	23.4976	846.1275	439.0385	0.1437972973138369	0.5188798378494967
mahe	8705.53	7851.74	5098.265	5682.158	276.144	431.831	6.46802	4.26199	3772.73	3397.84	5423.86	8934.17	8278.635	5390.2115	7179.014999999999	3585.285	0.651099064036523	0.4994118273885763
Dhdds	121.0	72.0	109.219	110.9112	0.0	2.01492	0.0	0.0	423.781	399.089	533.0	881.985	96.5	110.0651	707.4925000000001	411.435	1.1405709844559586	0.5815397336367523
Fip1	1881.0	1377.96	1023.99	1047.67	0.0	1.02524	0.0	1.03943	1190.01	1001.33	1514.0	2598.97	1629.48	1035.83	2056.4849999999997	1095.67	0.635681321648624	0.5327877421911661
Fie	36.99997	20.0	16.21863	19.01138	1.18732	2.32802	0.0	0.0	16.7814	18.9886	23.8127	32.672	28.499985	17.615005	28.24235	17.885	0.6180706761775489	0.6332688320908141
bisc	666.0	529.928	382.03	346.698	0.0	1.077078	0.0	1.07196	400.971	384.302	475.0	746.923	597.9639999999999	364.364	610.9615	392.6365	0.6093410305637129	0.642653424151931
Myc	5063.76	5149.65	1561.316	1631.609	22.9012	28.6245	7.50732	4.28276	2606.344	2517.258	5462.761	8721.645	5106.705	1596.4625	7092.203	2561.801	0.31262085826379243	0.36121371596385493
Rca1	2100.98	1593.96	1304.63	1282.68	2.05021	4.07847	1.01857	2.04147	1470.37	1190.32	1410.95	2164.92	1847.47	1293.6550000000002	1787.935	1330.3449999999998	0.7002305856116744	0.744067877187929
CG10802	661.0	546.986	328.4	335.5697	1.01028	1.00299	0.0	1.014	408.6	379.43	615.99	839.997	603.9929999999999	331.98485	727.9935	394.015	0.5496501615084943	0.5412342280528604
CG10803	1401.98062	1216.7964	627.00037	859.53769	2.0092935517	1.00082	40.0199	25.2038	1213.0	1172.46	1284.99	2095.0	1309.38851	743.2690299999999	1689.995	1192.73	0.56764590824155	0.7057594844955163
l(2)k09022	3386.83	2775.8	1555.69	1864.13	1.03812	1.03135	67.1678	48.2041	1129.31	1326.87	2274.96	4139.97	3081.315	1709.91	3207.465	1228.09	0.5549286587057799	0.3828849262579638
Nha1	162.0001	192.9998	281.8065	340.43236	1.13193	0.0	0.0	0.0	304.1937	347.5671	278.8682	321.0003	177.49995	311.11943	299.93425	325.8804	1.7527860148693	1.086506125925932
CG10809	831.0	690.0	487.816	534.155	3.67159	8.23429	0.0	0.0	573.18454	527.8458	478.3286	870.7651	760.5	510.9855	674.54685	550.51517	0.6719072978303747	0.8161259221653767
Rheb	1645.0	1185.0	622.253	550.4043959	2.03173	2.02413	0.0	1.00408	706.747	591.595	1088.97	1937.98	1415.0	586.3286979500001	1513.475	649.171	0.4143665709893994	0.4289274682436116
Drs	560.0	649.0	119.556	0.0	0.0	0.0	0.0	0.0	121.444	0.0	29.0	146.0	604.5	59.778	87.5	60.722	0.09888833746898262	0.6939657142857143
eIF4G1	13598.8664	11410.5103	8197.9451	8553.7243	9.33886	18.7017	4.145795	11.444023	6312.0589	6312.273	9775.659	16722.2895	12504.68835	8375.8347	13248.97425	6312.1659500000005	0.6698155496214345	0.4764267656418761
Dro	70.0	65.0	5.0	8.0	0.0	0.0	0.0	0.0	2.0	1.0	8.0	281.0	67.5	6.5	144.5	1.5	0.0962962962962963	0.010380622837370242
Ice2	429.233	534.5498	437.888	463.1141	0.0	1.06486	13.767	8.45044	116.1129	132.886	104.427	161.9356	481.8914	450.50104999999996	133.1813	124.49945	0.9348601157854238	0.9348117941482776
Ktl	68.99995588	45.0	31.0604	46.9528	0.0	0.0	0.0	0.0	27.9396	33.0472	18.0	35.0	56.99997794	39.006600000000006	26.5	30.493399999999998	0.6843265806358663	1.1506943396226414
eIF4B	5182.406	3750.398	2684.5197	2731.2959	15.2954	30.5969	275.59625	181.60052	3212.4868	2727.6981	3558.7025	6315.4821	4466.402	2707.9078	4937.0923	2970.09245	0.6062839395110426	0.6015873857574022
Cont	2006.0	2131.91	1667.07	1927.76	4.19035	5.24233	0.0	2.08845	1835.93	1686.24	2145.81	3087.76	2068.955	1797.415	2616.785	1761.085	0.8687549995045808	0.672995679813206
eIF5B	6753.60101277	4175.46989778515	2047.9784661512	2440.489275668	15.09211616	11.331	348.398	204.532	2811.02	3001.51	3958.91	7678.67	5464.535455277575	2244.2338709096002	5818.79	2906.2650000000003	0.4106906962680879	0.4994620874786683
CG10841	25.0	8.79139	12.04457	18.07484	10.0296	11.0	2.08845	3.31886	757.586	666.106	956.122	1851.06	16.895695	15.059705	1403.591	711.846	0.8913338575299802	0.5071605617305897
RyR	167.857950168118	58.0000224618882	156.191918258517	195.772021349022	1.2099357897706	2.4240650954626	1.141647625	0.0	175.80801383226	207.227958095419	79.7900040422	211.576245312105	112.9289863150031	175.98196980376952	145.68312467715248	191.51798596383952	1.5583418885288405	1.3146202512354221
DCTN5-p25	245.0	191.0	116.392	117.492	0.0	0.0	0.0	0.0	173.608	152.508	209.0	313.0	218.0	116.94200000000001	261.0	163.058	0.5364311926605505	0.624743295019157
enc	5468.2385971889	5600.9129254384	3480.1271	3956.4146843695	635.105232104591	1016.70857	56.76483912	59.0885	3819.87087	3765.5905	5048.8961918	7505.288599427	5534.57576131365	3718.2708921847498	6277.0923956135	3792.730685	0.6718258187330705	0.6042177565604102
Sc2	2789.43	1526.62	928.214	1014.63	3.51028	3.61882	19.5682	3.38139	1038.79	1047.37	1339.49	2435.38	2158.0249999999996	971.422	1887.435	1043.08	0.4501439974050348	0.5526441970187053
ida	462.552	428.729	286.555	352.67	0.0	0.0	74.448	57.271	430.445	436.33	364.0	596.0	445.6405	319.6125	480.0	433.3875	0.7171980553832069	0.902890625
B52	8929.1145248	5693.97150552737	3309.8671126536	3731.30432027155	80.714	221.58278	4.8786	6.02598	2872.1313	2513.7016	3921.2816	7693.417	7311.543015163685	3520.585716462575	5807.3493	2692.9164499999997	0.4815106345078049	0.46370836519167186
Atg12	239.0	193.0	91.9602	110.213	0.0	0.0	0.0	0.0	65.0398	64.7865	78.0	131.0	216.0	101.0866	104.5	64.91315	0.46799351851851856	0.6211784688995216
CG10863	1914.21	1246.11	513.378	553.317	6.88187	2.07468	1.029	4.14048	538.622	385.683	1036.7	1755.93	1580.1599999999999	533.3475000000001	1396.315	462.1525	0.33752752885783727	0.3309801155183465
CG10866	480.9996	480.0002	350.0262	368.3522	4.47437	19.6786	0.0	0.0	486.974	459.647	478.526	784.321	480.4999	359.1892	631.4235	473.3105	0.7475323095800852	0.7495927851909218
orb	17176.9745	12677.8258	2726.677	2853.2065	92.99788	187.918	1.03035	2.17766	3281.3227	2861.7942	9165.00415	15076.0552	14927.400150000001	2789.94175	12120.529675000002	3071.55845	0.18690071425465202	0.2534178400087123
nis	29.0	16.9424	14.9347	19.0	26.0	23.8868	1.0	1.05761	1.06529	1.0	0.0	3.11319	22.9712	16.96735	1.556595	1.032645	0.7386357700076618	0.6633999209813728
CG10874	1067.116	720.649	628.409	614.263958562	1.2773541	0.0	2.4374385	0.0	755.591	729.6464	714.723	1351.997	893.8824999999999	621.336479281	1033.3600000000001	742.6187	0.6950986055560995	0.7186447123945188
CG10877	237.136	166.381	22.7151	26.3307	0.0	0.0	27.8644	16.6193	83.2849	68.6693	360.0	638.0	201.7585	24.5229	499.0	75.97710000000001	0.12154580847894884	0.15225871743486977
Vha26	11041.3284	7459.9962	3620.64559	3771.1394	1938.52	3733.61	2.64092	4.00604	2764.35	2288.86	3419.48	5992.39	9250.6623	3695.892495	4705.935	2526.605	0.3995273392479153	0.5368975559585927
daed	756.9996	493.9999	380.0002	359.0003	3.000002	6.004689	2.0	3.0	634.9996	616.9998	619.9996	1087.9939	625.49975	369.50025	853.99675	625.9997000000001	0.5907280538481431	0.733023515604714
Sec24CD	2886.672	2801.39	1913.584	2222.528	36.7801	73.4791	2.32652	6.09106	2108.42	2263.47	2642.22	4290.52	2844.031	2068.056	3466.37	2185.9449999999997	0.7271566308524766	0.6306150237856892
Regnase-1	422.01	455.562	286.971	291.879	1.07079	0.0	24.4355	19.9616	221.862	162.201	302.626	498.536	438.786	289.425	400.581	192.0315	0.6596039983044126	0.4793824469957387
alpha-Est5	435.939	362.0002	33.3087	44.1871	0.0	0.0	2.061	0.0	160.691	175.813	290.0	702.0	398.9696	38.7479	496.0	168.252	0.09711993094210687	0.3392177419354839
mus201	557.815	619.238	518.886	521.8902	3.17237	0.0	87.1847	124.762	1452.11	1513.11	1308.83	1959.0	588.5265	520.3881	1633.915	1482.61	0.884222035881137	0.9073972636275448
lok	8972.0478	7800.3119	4693.6696	5039.0468	3.39821	11.3512	8.19585	4.68962	5235.348	5305.671	7095.9	11724.75	8386.17985	4866.358200000001	9410.325	5270.5095	0.5802830713200123	0.5600773087008153
tou	2956.4077	2781.2787	1973.5879	2572.8073	34.7171	87.36145	107.5947	101.724	2845.40598611	3524.1965679	3348.27993816476	6082.6356393349	2868.8432000000003	2273.1976	4715.45778874983	3184.801277005	0.7923742921885727	0.6753959890391384
CG10898	411.0	342.0	357.379	347.044	50.9314	86.129	0.0	0.0	303.621	276.956	334.069	511.871	376.5	352.2115	422.97	290.2885	0.9354887118193891	0.6863099037756815
osk	30395.8	24554.2	12891.32	14053.46	10.38066	20.7514	69.57236126	54.57081731	14136.597	13450.771	26893.64	45693.54	27475.0	13472.39	36293.59	13793.684000000001	0.490350864422202	0.38005840700795934
CG10903	1016.2682	559.0002	223.5319	248.1557	2.03857	0.0	0.0	0.0	236.551	222.844	484.961	944.968	787.6342	235.8438	714.9645	229.6975	0.2994331632628446	0.32127119598245785
CG10904	531.00000683747	289.000000769431	210.0	187.679	2.01241	1.0	0.0	0.0	168.0	150.321	185.988	291.0	410.00000380345045	198.8395	238.494	159.1605	0.48497438574493645	0.6673564114820499
CG10907	464.0	264.0	172.539	170.228	2.24212	0.0	0.0	0.0	229.461	223.772	277.758	499.0	364.0	171.3835	388.379	226.6165	0.4708337912087912	0.5834931857798696
Der-1	1261.0	782.0003	491.0	463.515	0.0	3.00544	1.00204	0.0	576.0	530.485	708.0	1287.99	1021.5001500000001	477.2575	997.995	553.2425000000001	0.4672123640902059	0.5543539797293574
Tailor	2175.164	1635.927	1210.0716	1385.5535	1.00561	0.0	2.01924	2.02127	1807.68	1791.43	1788.99	3243.0	1905.5455000000002	1297.81255	2515.995	1799.555	0.6810714044875864	0.7152458570068702
Spn55B	205.785	128.887	145.022	108.604	1.18418	1.08705	11.2151	13.1134	102.978	94.3958	182.816	309.913	167.336	126.81299999999999	246.36450000000002	98.6869	0.7578345365014102	0.400572728619586
CG10914	444.0	402.995	173.0	221.0	1.00376	0.0	1.0	1.00524	168.0	133.0	252.996	411.0	423.4975	197.0	331.998	150.5	0.4651739384530015	0.4533159838312279
Naus	1367.873	1405.14	904.398	944.669	0.0	2.13914	83.1264	71.8636	1442.5997	1528.333	1563.9993	2811.866	1386.5065	924.5335	2187.9326499999997	1485.4663500000001	0.6668079089423671	0.6789360495168808
CG10916	226.6648	197.976	72.8868	75.3215	0.0	1.04376	0.0	0.0	46.8344	41.3858	46.0	110.0	212.3204	74.10415	78.0	44.1101	0.34902039559081466	0.5655141025641026
CG1092	10.0	3.0	30.0	24.0	2.0	0.0	0.0	0.0	16.0	15.0	0.0	3.0	6.5	27.0	1.5	15.5	4.153846153846154	10.333333333333334
La	4482.66	3201.65	1617.82	1572.5	3.07767	5.14976	160.34	120.353	2588.18	2299.5	3981.92	7225.85	3842.1549999999997	1595.1599999999999	5603.885	2443.84	0.4151732556338825	0.43609745738893646
Klp67A	1471.0587	1742.34	1416.48	1577.5258	4.12436	5.19185	87.9375	101.662	1797.52	1731.48	1756.7	2785.53	1606.6993499999999	1497.0029	2271.1150000000002	1764.5	0.9317255901049565	0.7769311549613295
Pepck2	20.9387	21.99996	3.73791	7.69635	2.07069	0.0	1.06132	0.0	8.2621	3.30365	106.9293	212.9998	21.46933	5.71713	159.96455	5.782875000000001	0.2662928931643419	0.036150978451163086
CG10927	168.909	93.9265	52.8659	60.0282	0.0	0.0	2.09092	1.07352	126.134	123.972	193.0	338.0	131.41775	56.447050000000004	265.5	125.053	0.4295237895946324	0.47100941619585684
Acat1	2404.9758	1819.9	1084.03	1055.4729	1.02638	11.3284	1.02799	4.10481	1479.97	1289.53	2236.97	3156.67	2112.4379	1069.75145	2696.8199999999997	1384.75	0.5064061054765208	0.5134751299678881
CG10936	391.258	173.765	10.0	16.8049	2.02315	1.01668	16.74245	7.23487	45.000015091	27.19514	96.97685	167.9833	282.51149999999996	13.40245	132.480075	36.0975775455	0.04744036968406597	0.2724755216624085
Prosalpha5	3687.674	2303.91	1464.718	1505.50000780121	11.04410104627	3.2852600992339	9.32574	3.09262	1764.28	1638.5	2713.96	4305.71	2995.792	1485.1090039006049	3509.835	1701.3899999999999	0.49573168093799735	0.484749283085957
CG10939	1633.89	1052.85	692.339	683.229	49.8689	96.3105	10.1072	1.15161	644.661	710.771	732.131	1405.69	1343.37	687.7840000000001	1068.9105	677.7159999999999	0.5119840401378624	0.6340250189328291
RpS6	50503.9167	22146.1851	8856.964	9086.8372	12.34855	53.3808	47.0975	37.8417	11846.0	10804.9	26831.9	52281.6	36325.0509	8971.9006	39556.75	11325.45	0.24698934695780428	0.2863089106157609
CG10948	641.639000199905	460.6158958	416.331235	482.19474105	0.0	1.1515	41.36136	31.38428	559.6687	556.8044	602.9995	924.8484	551.1274479999524	449.262988025	763.92395	558.23655	0.8151707733943943	0.7307488526835688
CG10949	396.945	357.911	273.611	259.824	1.03685	0.0	1.05519	1.08898	432.389	441.176	444.963	682.0	377.428	266.7175	563.4815	436.7825	0.7066712061638245	0.7751496721720235
niki	13.0	1.0	0.0	0.0	0.0	0.0	0.0	0.0	12.0502	31.0589	24.0525	49.1877	7.0	0.0	36.6201	21.55455	0.0	0.5885988842193222
Arpc2	8557.99000043383	5829.7482	4094.0900017171	4062.7700047724	242.315000352236	396.523000136798	29.0148	26.2521	3771.21	3419.94	4507.57	7196.92	7193.869100216915	4078.43000324475	5852.245	3595.575	0.5669313614730318	0.614392425470909
Rtf1	1984.78	2122.439	1872.628	2047.45	32.8557	45.0288	5.5067	2.22318	2528.51	2629.84	2608.59	4043.32	2053.6095	1960.039	3325.955	2579.175	0.954436079498074	0.775469000632901
CG10958	101.632	54.8096	21.5687	13.2515	2.30754	3.2225	4.36756	2.19044	51.4313	50.7485	103.692	186.778	78.2208	17.4101	145.23499999999999	51.0899	0.22257634797905418	0.35177402141357117
CG10959	401.5548	412.107	345.61477	341.5062	0.0	0.0	9.44506	18.8934	442.385	399.494	401.0	625.0	406.83090000000004	343.56048499999997	513.0	420.9395	0.8444798195024025	0.8205448343079922
nebu	4632.97429	4249.80835	2441.43	2913.17	4.3426	4.37981	140.895	125.741	3208.51782	3072.08968	4498.49454	6832.5549	4441.391320000001	2677.3	5665.524719999999	3140.30375	0.6028065998021539	0.5542829490999027
Traf6	573.618	687.131	441.151	408.839	0.0	0.0	6.38214	13.8688	492.849	439.161	566.0	940.0	630.3745	424.995	753.0	466.005	0.6741944669398905	0.6188645418326694
CG10962	89.0414	93.5591	29.3328	31.5338	0.0	0.0	0.0	0.0	3.0	4.0	8.0	2.0	91.30025	30.4333	5.0	3.5	0.33333205549820505	0.7
sni	671.677	375.828	257.851	304.2703	1.10833	8.88491	0.0	0.0	224.172	191.242	248.892	427.12	523.7525	281.06065	338.006	207.707	0.536628751175412	0.6145068430737917
Corp	947.0	694.0	378.0002	332.0003	0.0	1.0	0.0	0.0	324.0	231.0	518.0	952.0	820.5	355.00025	735.0	277.5	0.43266331505179767	0.37755102040816324
Atg1	2108.395	2338.411	1502.162	1700.237	0.0	3.26914	22.5153	38.5468	1838.444	1920.229	2040.508	3184.79	2223.4030000000002	1601.1995000000002	2612.649	1879.3365	0.720157119514546	0.7193222281293813
Hip1	921.9997	1082.9983	780.935	881.332	32.3834	49.7818	0.0	0.0	863.065	799.668	729.617	1121.22	1002.499	831.1334999999999	925.4185	831.3665000000001	0.8290616748744886	0.8983681437101161
CG10973	667.848	357.586	212.729	225.022	0.0	1.05251	3.13349	2.1156	311.826	263.978	318.939	706.211	512.717	218.8755	512.575	287.90200000000004	0.42689339343146415	0.5616778032483052
Ptp69D	2041.365	2263.991	2109.413	2421.67	1.103942	5.51651	90.6339	91.0047	1956.587	2044.332	1700.898	2582.481	2152.678	2265.5415000000003	2141.6895	2000.4595	1.0524293461446628	0.9340567341811219
jagn	2127.673	1318.167	763.286	814.2303	122.716	253.971	0.0	0.0	558.093	537.019	751.615	1234.72	1722.9199999999998	788.75815	993.1675	547.556	0.45780311912334876	0.5513229138085973
CG10979	2149.925	2686.0	1903.584	2072.493	20.4341	34.5302	1.07876	0.0	1758.42	1613.5	2152.57	3004.47	2417.9625	1988.0385	2578.52	1685.96	0.8221957536562292	0.6538479437817043
Madm	1735.7483	1390.3904	547.0803	620.4806	2.11859	3.24336	35.8529	29.3464	885.983	875.456	1320.88	2307.76	1563.06935	583.78045	1814.3200000000002	880.7194999999999	0.3734833966260038	0.48542677146258645
dgrn	1149.0	1000.0	675.0	693.999	1.0000001509938	1.0000000446502	1.0	0.0	1156.0	1043.0	1246.999	2136.999	1074.5	684.4995	1691.9989999999998	1099.5	0.6370400186133085	0.6498230790916544
CG10984	783.6453	759.8509	603.193703761	646.870000529572	3.259460210491	3.2195478785585	5.37321	7.44728	966.2514	899.131	935.8023	1452.52	771.7481	625.031852145286	1194.16115	932.6912	0.8098910151450791	0.7810429940716126
g	2026.697	1991.6606	1250.5153395	1446.90125204	0.0	2.12231	173.3006	203.334791	1936.4858	1955.1	2112.0	3794.88	2009.1788	1348.70829577	2953.44	1945.7929	0.6712734057168033	0.6588225594560918
Grip91	1663.08	1500.94	1361.69	1580.33	3.01454	4.90441	2.00943	4.03291	1594.251	1582.249	1579.987	2413.985	1582.01	1471.01	1996.986	1588.25	0.9298360945885298	0.7953235525937588
Dap160	1352.3947680956	1202.47724901787	643.580042	580.8373	8.26037	11.7169	12.6037	11.51972	797.41953	762.1624	1137.74212	1869.28645	1277.436008556735	612.2086710000001	1503.5142850000002	779.790965	0.47924801469443623	0.518645531192941
Pdcd4	9319.521	8283.299	4437.231	4744.173	10.87378945	19.79054	6.47897	9.70272	6725.76	5928.83	9642.13	15392.2	8801.41	4590.701999999999	12517.165	6327.295	0.5215871093381628	0.5054894618709588
CtsB	3904.2192	2414.2869	1205.0646	1349.56615	12.165	9.10167	70.7811	61.7121	1982.93	1856.43	3245.84	5704.9	3159.2530500000003	1277.3153750000001	4475.37	1919.68	0.4043092955152801	0.42894330524627017
Clic	1547.0	1320.0	921.3661	892.2497	188.938	363.094	0.0	0.0	848.634	765.7503	973.0625	1558.903	1433.5	906.8079	1265.9827500000001	807.1921500000001	0.6325831182420649	0.6376012232394161
r-cup	13.0	13.9103	10.9454	2.0	1.0	2.15853	1.0	1.08967	1.05458	7.0	25.0	41.8415	13.45515	6.4727	33.42075	4.02729	0.48105743897318126	0.12050268171719665
Rpn5	6880.98	4492.98	3794.38	4059.57	4.00971	11.0487	6.02411	5.01742	3877.62	3771.43	4041.99	6896.95	5686.98	3926.9750000000004	5469.469999999999	3824.5249999999996	0.6905202761395329	0.6992496530742467
Fkbp12	11707.1	5972.21	2626.28	2517.93	7.03283	11.6169	33.8651	31.7875	2454.72	2415.07	4391.97	7644.38	8839.655	2572.105	6018.175	2434.895	0.29097345993706764	0.40459026199803094
Sap130	1602.31080006669	1563.37952	956.44945354	1135.897	1.08166989148	0.0	51.950200431282	32.0469547623	1200.0929	1098.3989	1301.879	2454.8413	1582.845160033345	1046.17322677	1878.36015	1149.2459	0.6609447678053112	0.6118346899554912
CG11007	858.454	566.2855	366.4248	384.0819	0.0	5.00363	142.546	115.715	761.575	677.918	628.0	1090.0	712.36975	375.25335	859.0	719.7465	0.526767665246875	0.8378888242142025
Wbp2	856.9155	604.95427	319.6604	309.43042	3.19216	8.31974	5.24569	3.45053	341.5284	331.5258	370.07059	787.5628	730.9348849999999	314.54541	578.816695	336.5271	0.4303330111272498	0.5814053100178805
Ref1	7620.57	5465.9	4035.2	4082.76	4.2986	3.23561	4.25509	2.10112	4329.7985	3704.2452	4778.7037	7847.7598	6543.235	4058.98	6313.23175	4017.02185	0.6203322974033487	0.6362861382365695
COX5B	1634.394	849.475	479.434	509.326	271.436	482.058	2319.61	1093.53	1501.57	1525.67	1747.56	3233.94	1241.9345	494.38	2490.75	1513.62	0.39807252314836244	0.6076964769647696
MP1	233.68034	133.4754	46.7824	31.5945	1.0	0.0	1.0	0.0	104.71894	97.8814	201.6839	422.1145	183.57787000000002	39.18845	311.8992	101.30017000000001	0.2134704471731805	0.3247849625776533
cl	3713.32	2090.35	1242.87	1289.52	1.07047	6.45253	3.2287	4.26616	992.672	1028.77	1495.93	2863.55	2901.835	1266.195	2179.7400000000002	1010.721	0.43634286580732534	0.46368878857111395
Kpc2	290.0005	279.00010833295	167.53243	147.534	4.2967	11.643	0.0	0.0	140.467	160.466	173.703	308.357	284.50030416647496	157.53321499999998	241.03000000000003	150.4665	0.5537189686370938	0.6242646143633571
Arf4	2070.719	1435.645	819.29	719.185	2.366	7.94655	2.28445	2.35442	560.71	500.815	944.634	1428.05	1753.182	769.2375	1186.342	530.7625	0.4387664828865457	0.44739417469835846
CG11029	5.0	2.0	0.0	0.0	1.0	0.0	41.0	26.0	4.0	2.0	30.0	59.0	3.5	0.0	44.5	3.0	0.0	0.06741573033707865
CG1103	1455.992	876.0	532.924	547.528	1.00478	1.0069	3.00783817133	0.0	654.0756	560.4723	696.9952	1129.993	1165.996	540.226	913.4940999999999	607.27395	0.4633171983437336	0.6647814693056037
CG11030	1813.803	988.78224	551.71881	540.50028	0.0	1.00144	1.19312	1.21757	519.281	445.5	906.0	1680.0	1401.2926200000002	546.109545	1293.0	482.3905	0.38971841941192836	0.37307849961330236
Kdm2	2110.337058	1841.6695	1337.95924	1565.728284089	2.1995265463	1.07433018518	0.0	2.15535306	1358.9801	1310.5786067	1618.8	2435.9260661736	1976.003279	1451.8437620445	2027.3630330868	1334.7793533499998	0.7347375267409665	0.6583820122820856
CG11034	411.392	444.21	234.396	289.3825	1.0060575	0.0	37.6076	21.79047	644.6038	710.618	542.994	758.0	427.801	261.88925	650.4970000000001	677.6109	0.6121754039845629	1.0416818217455268
CG11035	153.7318	120.0	73.91708	76.0	0.0	2.031531	0.0	0.0	113.0	115.0	92.0	166.0	136.8659	74.95854	129.0	114.0	0.547678713251438	0.8837209302325582
Ufl1	621.0	454.9953	293.9663	384.3375	1.01702	2.01583	0.0	1.00429	322.034	313.663	306.983	522.984	537.99765	339.15189999999996	414.98350000000005	317.8485	0.6303966197621866	0.7659304526565514
CG1105	530.372	481.517	301.454	237.546	0.0	2.0	11.063	11.1765	472.778	420.798	518.706	809.519	505.94449999999995	269.5	664.1125	446.788	0.5326671206031492	0.6727595098721979
CG11050	1859.5308	1667.004	1164.4895	1291.78	2.15249	3.27302	12.4646	24.9913	1477.5077	1448.214	1695.8505	2839.731	1763.2674	1228.13475	2267.79075	1462.86085	0.6965107787962279	0.6450598892336076
Nplp2	85.0	75.0	15.0	32.0	2.0	2.0	0.0	0.0	21.0	19.0	59.0	286.0	80.0	23.5	172.5	20.0	0.29375	0.11594202898550725
Hsl	1089.737	1434.2786	849.019	826.534	2.1203395718	5.2305675506	19.2635	23.7247	767.9829	784.466	1030.879	1514.7681	1262.0078	837.7764999999999	1272.82355	776.2244499999999	0.6638441537366091	0.6098445067267965
Cals	1087.0431	671.938	316.3436	320.5187	5.249505	4.175716	1.04586	1.06177	298.656	329.481	1106.75	1848.83	879.49055	318.43115	1477.79	314.0685	0.36206318532927956	0.21252579865880808
Gel	830.9195	489.0001	163.097590412549	144.9439039	2.05844	0.0	2.08071	0.0	429.903	380.056	1106.94	1963.0	659.9598	154.02074715627452	1534.97	404.97950000000003	0.2333789833203091	0.26383544955276
GM130	1030.32	822.926	612.898	651.189	0.0	2.0387	85.679	82.0736	1094.1	1099.81	1044.0	1959.96	926.623	632.0435	1501.98	1096.955	0.6820934727499749	0.7303392854765043
jub	1748.851	1356.6699	1070.788	1040.191	2.28908251	1.1593308	1.145504023	2.3304871	1123.212	1021.809	1246.709	2335.839	1552.7604500000002	1055.4895000000001	1791.274	1072.5104999999999	0.6797503761768275	0.5987417335371361
apolpp	119.00000075916	229.9959556472	28.80956942048	61.677542969	14.2945	12.2482	0.0	1.00443	41.1905	44.3224	119.706	213.752	174.49797820318	45.24355619474	166.729	42.75645	0.25927839772481387	0.25644279039639173
scaf	5.0	10.0	15.0	12.0	3.01929	5.02049	0.0	0.0	15.0	16.0	114.981	200.98	7.5	13.5	157.9805	15.5	1.8	0.09811337475194723
CG11069	99.0	55.0	10.5636	7.20908	0.0	0.0	0.0	0.0	27.4363948	27.7909605	74.999999	106.000005	77.0	8.88634	90.500002	27.61367765	0.11540701298701299	0.30512350320169057
aux	2253.5359	2246.7533	1381.55	1832.7283	5.01333067	6.043017627	2.00549	0.0	1513.24	1583.17	1833.99	2746.96	2250.1445999999996	1607.13915	2290.475	1548.205	0.7142381649605987	0.6759318481974262
Ube4A	1186.99	1393.99	1088.9	1264.32	7.09769	5.05333	1.01276	1.00793	762.105	751.683	1011.9	1418.95	1290.49	1176.6100000000001	1215.425	756.894	0.9117544498601308	0.6227401937593846
CG11076	3842.0	2518.997	1761.572	1589.5321	5.00275	4.0012	1.00026	3.0	1323.43	1128.41	1908.0	3515.0	3180.4984999999997	1675.5520499999998	2711.5	1225.92	0.5268205754538164	0.45211875345749586
Mpv17	750.0	340.674	156.0	139.0	0.0	0.0	0.0	1.0	483.0	432.0	896.0	1524.0	545.337	147.5	1210.0	457.5	0.2704749540192578	0.378099173553719
PlexA	7051.588	7432.519	7802.585	7943.805	7.590479555	11.8246	9.19093	10.173	7253.419	7087.08	10723.41	13502.13	7242.0535	7873.195	12112.77	7170.2495	1.0871495218862992	0.5919578676058408
pk	33.99997	8.0	15.6739	13.04437	1.0627848432	1.17395	0.0	0.0	9.32606	10.9556	142.93756	259.8258	20.999985	14.359135	201.38168000000002	10.140830000000001	0.6837688217396346	0.05035626875294714
Gadd45	208.0	181.0	39.7285	34.7414	2.19673	3.44421	0.0	0.0	61.2715	36.2586	161.803	238.556	194.5	37.23495	200.17950000000002	48.76505	0.19143933161953727	0.24360661306477435
CG11089	3479.0	2488.99	771.609	765.582	5.00568	1.00071	0.0	2.00079	683.39	559.418	1829.99	2953.0	2983.995	768.5955	2391.495	621.404	0.25757265008822067	0.2598391382796117
Wdr33	2352.8218	1822.9966	1369.6737	1357.3596	0.0	1.1654178	1.17387	0.0	1411.33	1335.64	1684.0	2756.83	2087.9092	1363.51665	2220.415	1373.4850000000001	0.6530536145920521	0.618571303112256
Nup93-1	3020.0	2598.0	1831.0	2110.53	4.00242	0.0	1.0	1.0	2090.0	2004.47	3245.0	5068.0	2809.0	1970.765	4156.5	2047.2350000000001	0.7015895336418655	0.49253819319138703
fuss	558.86535	289.6116	120.433	107.58601	1.0	2.67255	0.0	0.0	3.94836	2.26115	7.9848	19.9483	424.238475	114.009505	13.96655	3.104755	0.2687391920310858	0.22229935094923228
dsx	299.0662	191.0162	108.3965	107.3262	14.0	11.07313	1.10233	0.0	37.6114	69.6813	23.000040101387	48.9269	245.0412	107.86135	35.9634700506935	53.64635	0.4401763866647731	1.491690037818403
CG11095	354.0	265.0	200.209	187.929	0.0	0.0	0.0	0.0	174.791	158.071	179.0	407.0	309.5	194.06900000000002	293.0	166.43099999999998	0.6270403877221326	0.5680238907849828
Tango1	2708.578650466	2378.446899	1873.3276	2081.679743	3.27641	4.43233	5.42072	5.55042	2233.68	2475.33	2136.72	3751.57	2543.512774733	1977.5036715	2944.145	2354.505	0.7774695260603064	0.7997245380237726
Mes2	1622.8121	1778.9269	691.28495	934.6926	26.9661	42.6052	3.18304	1.07001	1995.72	1720.31	1822.03	2689.39	1700.8695	812.988775	2255.71	1858.0149999999999	0.47798421630818827	0.8236940918823784
pwn	210.8568	59.5843	10.0	17.88468	0.0	0.0	7.14272	3.415716	4.0	2.11532	6.0000000263231	12.0	135.22055	13.94234	9.00000001316155	3.0576600000000003	0.10310814443514688	0.33973999950316613
amrt	232.0	188.0	153.435	145.0	0.0	0.0	0.0	0.0	212.565	193.0	254.0	441.0	210.0	149.2175	347.5	202.7825	0.7105595238095238	0.5835467625899281
Dhx15	3848.26	2401.76	1139.79	1105.67	4.1789	3.11949	3.20494	2.12239	1195.87	1165.9585	2016.8214	3469.885	3125.01	1122.73	2743.3532	1180.9142499999998	0.3592724503281589	0.43046380247355676
CG11109	797.6594	560.4037	326.9996	272.8197	0.0	0.0	0.0	0.0	134.0	101.0	252.0	415.0	679.0315499999999	299.90965	333.5	117.5	0.4416726292025754	0.3523238380809595
CG11110	465.0	261.0	152.791	177.221	1.12929	0.0	0.0	0.0	165.209	146.7785	252.8709	435.9998	363.0	165.006	344.43534999999997	155.99375	0.4545619834710744	0.4528970385879382
rdgB	1701.166216644	1633.68684248963	1036.8991	1087.4527422	223.5188	346.6175243816	20.829740388	24.17821144	1581.05368	1414.8653159605	1882.04867	2794.21937002249	1667.4265295668151	1062.1759211	2338.134020011245	1497.95949798025	0.6370151261632772	0.6406645150191372
Ssl1	1182.86	910.369	545.901	568.315	29.3162	25.6276	0.0	1.00829	787.676	713.733	1107.59	1867.73	1046.6145	557.108	1487.6599999999999	750.7045	0.5322953198145067	0.5046210155546295
alpha-Est7	44.0	32.0	10.0	16.0	1.0	0.0	0.0	0.0	42.0	45.0	165.0	360.0	38.0	13.0	262.5	43.5	0.34210526315789475	0.1657142857142857
Mink	1126.58	1071.32	741.846	925.857	1.02857	0.0	0.0	0.0	658.521480043	712.434100012064	549.9718	865.9731	1098.9499999999998	833.8515	707.97245	685.477790027532	0.758771099686064	0.9682266450163873
so	46.0	8.0	33.419	20.1905	1.15731	0.0	0.0	0.0	18.581	25.8095	20.8427	35.0	27.0	26.80475	27.92135	22.19525	0.9927685185185184	0.7949203745520901
CG11122	2130.9	1533.48	1165.55	1671.05	4.24117	4.22835	17.7474	8.85154	1619.63	2061.38	2057.67	4664.71	1832.19	1418.3	3361.19	1840.505	0.7741009393130625	0.5475754122795796
CG11123	855.956	570.979	278.405	306.905	0.0	0.0	2.04356	1.02061	552.595	491.095	1010.0	1633.0	713.4675	292.655	1321.5	521.845	0.4101868690585065	0.39488838441165347
CG11125	440.412	294.254	44.3497	26.8034	9.64241	14.20566	2.07935	0.0	264.65	247.197	339.358	877.794	367.33299999999997	35.57655	608.576	255.9235	0.09685094995548998	0.4205284138710695
CG11127	913.0	553.0	342.596	332.81	0.0	1.02857	0.0	0.0	276.404	273.19	392.0	691.971	733.0	337.703	541.9855	274.797	0.4607135061391541	0.5070190992194441
slif	3797.817	4184.971	2023.3073	2357.676	4.08159	8.17582	4.1828	1.02713	3121.6977	2851.3223	4016.918	5535.821	3991.394	2190.49165	4776.3695	2986.51	0.5488036635821971	0.6252677896883816
Yp3	17601.642	11903.663	2004.0921	1700.8921	9.21223	15.29837	16.3404	15.3023	2932.91	2741.11	8329.79	10278.7	14752.6525	1852.4921	9304.245	2837.01	0.12557010341021724	0.3049156594651151
Rtc1	1022.51	685.619	361.611	308.958	0.0	1.02824	15.487	14.3808	404.389	355.042	689.0	1197.97	854.0645	335.2845	943.485	379.7155	0.3925751509400051	0.4024605584614488
DMAP1	1133.97	810.138	544.615	540.968	1.20634	1.21193	339.031	223.862	923.385	854.032	905.794	1709.79	972.0540000000001	542.7915	1307.792	888.7085	0.5583964471109629	0.6795488120435054
BoYb	855.0	957.0	271.0	403.0	0.0	1.0	0.0	0.0	515.0	530.0	715.0	969.0	906.0	337.0	842.0	522.5	0.3719646799116998	0.6205463182897862
CG11134	850.00000208267	484.9587	220.05000315702	220.68100749244	0.0	0.0	0.0	1.04087	182.95	176.319	262.0	488.0	667.479351041335	220.36550532473	375.0	179.6345	0.3301458014857503	0.47902533333333336
Lrt	6.0	8.0	4.3961	11.07716	0.0	0.0	2.0	0.0	42.6039	53.9228	42.0	63.0	7.0	7.73663	52.5	48.26335	1.1052328571428571	0.9193019047619048
EMC4	1900.8167	1106.3605	582.968	641.986	3.16135	3.11351	2.06742	0.0	547.383	495.633	681.33	1174.14	1503.5886	612.477	927.7350000000001	521.508	0.407343471478834	0.5621303497227117
Pits	1481.4655	1427.0034	858.7179	840.8605	0.0	8.05717	2.53475	0.0	1522.2825	1221.14	2034.998	3549.942	1454.23445	849.7891999999999	2792.4700000000003	1371.71125	0.5843550192336593	0.4912179002818293
p47	3257.98	2016.0	1281.74	1294.23	1.00239	3.01539	2.01975	1.00496	1575.26	1591.77	2106.0	3340.98	2636.99	1287.9850000000001	2723.49	1583.5149999999999	0.4884299902540397	0.5814286081461654
Aldh-III	2104.9613	1485.00035	833.000946864	842.808238	20.55532	32.91739	1.0374	0.0	834.9986	857.1923	1250.445	2371.0815	1794.980825	837.904592432	1810.76325	846.09545	0.4668042024526919	0.46725901356789745
CG11141	477.9997	752.9997	486.2449	438.3951	5.004413	7.04384	1.0	1.0	962.755	939.605	1281.0	2038.96	615.4997	462.32	1659.98	951.1800000000001	0.7511295293888852	0.573006903697635
Inos	3667.94	2660.0	1288.52	1123.7	23.6044	10.3536	2.05679	0.0	1529.48	1302.3	2278.4	4096.65	3163.9700000000003	1206.1100000000001	3187.5249999999996	1415.8899999999999	0.38120146524777415	0.4441973004133301
mGluR	104.0001	54.00001269	13.340477	9.0	0.0	0.0	0.0	0.0	27.0967	10.5465	16.0	32.0	79.000056345	11.1702385	24.0	18.8216	0.1413953232035508	0.7842333333333333
CG11147	175.3164	109.46613	44.6498	21.1319000537057	10.8988	12.7689	3.6839	2.53411	45.3502	14.8681	106.1012	101.2311	142.391265	32.890850026852846	103.66615	30.10915	0.23098923959171824	0.2904434089623276
Gyf	8585.68137	8535.5791	7380.2454	7368.5572	5.10840068	15.4098117	15.323	17.4255	7096.761	7695.447	7869.888	13786.59	8560.630235	7374.4012999999995	10828.239	7396.104	0.861432055533701	0.6830384885298524
Vps37B	637.099	441.0581	229.9947	247.0283	2.21352	3.08871	1.07683	0.0	250.63	235.09	333.852	556.993	539.0785500000001	238.5115	445.4225	242.86	0.44244294268432677	0.5452351419158216
CG11151	1334.906	952.0235	546.4796	672.8391	3.264117	0.17055	0.0	0.0	561.58214	387.585801	867.736	1710.941	1143.46475	609.65935	1289.3385	474.58397049999996	0.5331684689012057	0.36808330046764287
Sox102F	89.13151	117.24829	110.15676	42.23998	0.0	2.32745	0.0	1.01358	5.14429	3.999997	20.00001	37.0	103.1899	76.19837000000001	28.500005	4.5721435	0.7384285671369002	0.1604260595743755
ATPsynbeta	40724.6622	20614.873	9489.285	8905.76443	34.9659	47.2457	21.3728	17.1132	9526.72	9052.29	20281.0	37431.8	30669.7676	9197.524715	28856.4	9289.505000000001	0.29988896019544664	0.32192182670048936
CG11155	169.8205	68.00003	144.52344	114.70531	1.0	0.0	1.1799	0.0	17.47612	13.29514	0.0	3.0	118.91026500000001	129.614375	1.5	15.38563	1.090018384871987	10.257086666666668
mus101	704.657	1063.53	710.369	638.217	0.0	2.11035	18.343	24.4709	1365.63	1234.78	1607.0	2169.89	884.0935	674.293	1888.445	1300.205	0.7626942172971525	0.6885056223506641
CG11158	125.738	64.9626	20.6544	19.0297	0.0	0.0	1.0	5.0	40.0	37.00002	66.0	113.0	95.3503	19.84205	89.5	38.50001	0.20809635627785125	0.43016770949720673
CG1116	680.95256	640.00089	361.526	395.466	1.01123	2.01965	2.0473332	0.0	437.4739	385.5339	440.9892	703.9802	660.476725	378.496	572.4847	411.50390000000004	0.5730648570545768	0.7188033147436081
ZnT41F	146.00002124	98.0	148.30889666	143.106200803267	0.0	0.0	0.0	0.0	100.6910174	109.89380333313	122.0000307716	229.9996210918	122.00001062	145.7075487316335	175.9998259317	105.29241036656501	1.194324065966491	0.5982529233149678
CG11164	551.8389	470.852	380.734	379.3584	12.0	10.0176	116.161	91.1485	730.266	741.642	647.0	1016.98	511.34544999999997	380.0462	831.99	735.954	0.7432278902647907	0.8845707280135577
Eaf	1939.185	1757.882	1247.8081	1414.792	24.26202	37.15991	1.1259	1.09621	1207.18830194617	1191.2042141645	1405.7387	2378.83720560483	1848.5335	1331.3000499999998	1892.287952802415	1199.196258055335	0.720192547227302	0.6337282104868688
CG11168	401.9818	269.999537	129.4067	125.1032	11.0	42.1576000126775	1.01871	0.0	133.5928	109.89700992906	211.99953488	449.842	335.99066849999997	127.25495000000001	330.92076743999996	121.74490496453001	0.37874548887955206	0.3678974453804984
CG11170	265.82029	210.9997	116.0809	114.0983	0.0	1.00238	24.1798	11.0	201.9189	197.9017	298.0	442.997	238.40999499999998	115.08959999999999	370.49850000000004	199.9103	0.4827381503028009	0.5395711453622619
NFAT	1393.0714	1289.73865	751.02066	833.4795	117.08985	205.996	18.92884	30.49845	1498.0688	1502.7876	1754.90975308251	2998.0073	1341.405025	792.25008	2376.458526541255	1500.4282	0.590612130739558	0.6313715064843791
Snap29	916.956	611.0	444.314	426.606	1.03922	0.0	1.04433	0.0	571.686	541.394	661.961	1060.0	763.9780000000001	435.46000000000004	860.9805	556.54	0.5699902353209124	0.6464025608013189
Rcd6	31.91016	11.64744	11.61599	10.56533	0.0	0.0	4.47409	2.47822	10.5526	13.6418	8.18491	27.3497	21.7788	11.09066	17.767305	12.0972	0.5092410968464746	0.6808685954341416
Tango2	363.12142	278.86267	175.4284	165.01	1.00355	3.02873	76.87835	48.1368	370.57217	328.9897	370.997300034855	635.9712	320.99204499999996	170.2192	503.4842500174275	349.780935	0.5302910232557322	0.6947207087170905
BthD	1633.63	876.854	397.398	425.413	2.00524	1.0	97.3741	73.1464	634.602	504.587	805.995	1141.0	1255.2420000000002	411.4055	973.4975	569.5944999999999	0.32774994781882694	0.5851011430435106
CG11178	650.9906	749.658	581.662	595.165	0.0	3.19028	15.0089	6.34162	777.338	695.835	825.0	1397.81	700.3243	588.4135	1111.405	736.5865	0.8402014609517333	0.6627525519500093
CG11180	1655.449	1385.483	763.838	727.948	1.00739	3.0607	149.59	138.057	1059.529	1086.029	1528.995	2882.94	1520.466	745.893	2205.9674999999997	1072.779	0.49056868091756084	0.4863077085224511
cup	5695.33941	5059.907	3507.9	3757.88	9.23907	13.07728	44.5219	38.4878	9866.37	10220.4	11633.0	17388.5	5377.623205	3632.8900000000003	14510.75	10043.385	0.6755568141371854	0.6921341074720466
DCP1	1102.0	705.00000785574	466.8	459.642	30.8288	74.0345	0.0	0.0	326.2	309.358	456.171	704.966	903.50000392787	463.221	580.5685	317.779	0.5126961792874334	0.5473583220584651
Upf3	592.641	465.914	287.591	255.261	1.0	0.0	3.00458	2.0	390.396	402.174	443.081	910.04	529.2774999999999	271.426	676.5605	396.28499999999997	0.5128236133219342	0.5857347569064406
Aatf	1121.46	732.283	457.952	467.166	2.04911	0.0	231.536	201.717	714.048	670.834	810.951	1507.0	926.8715	462.55899999999997	1158.9755	692.441	0.4990540759965108	0.5974595666603824
Gnf1	3887.9949	3719.9939	2939.3499	3499.331	1.00669	5.03619	1.00771	1.00831	3084.65	2984.67	3077.99	5235.96	3803.9944	3219.34045	4156.975	3034.66	0.8463052548132037	0.7300164181887069
PIG-T	1678.61	1328.46	731.613	809.271	1.05127	2.10571	137.391	104.543	1068.39	924.729	1454.95	2240.89	1503.5349999999999	770.442	1847.92	996.5595000000001	0.5124203959335832	0.5392871444651284
ACC	3765.0038	2762.93859	865.3785	896.97120196154	21.11712	26.54572	0.0	1.062180177049	1019.62030034356	1199.029	2903.88459295	4593.4533	3263.971195	881.1748509807701	3748.6689464749998	1109.32465017178	0.26997016773022414	0.2959249445633004
Liprin-alpha	1708.508	1581.012	843.0627	962.799	8.13539	8.97302	32.49115	28.9872981	1236.9387	1343.202	1707.8643	2745.0323	1644.76	902.93085	2226.4483	1290.07035	0.5489742272428804	0.5794297356915945
IntS10	301.696	322.709	285.687	244.55	0.0	0.0	19.3041	34.2913	552.3132	551.45	527.9996	800.0	312.2025	265.11850000000004	663.9998	551.8816	0.8491876266205429	0.8311472382973609
CG11200	805.6747	462.328	84.3798	121.50284	1.0732	1.05227	71.3249	38.6723	233.6199	261.4974	546.927	1142.948	634.00135	102.94132	844.9375	247.55865	0.16236766688272825	0.2929904874620904
phr	971.516	800.5575	523.8445	513.20564	1.00415	1.00134	1.00207	0.0	382.839	419.106	499.9958	759.999	886.03675	518.52507	629.9974	400.97249999999997	0.5852184686470397	0.6364669124031306
Liprin-gamma	100.762350357533	50.77403	31.57192011074	24.652	0.99999981794	1.22069415664	3.23763	3.22596	20.42806	43.34807	14.99996	43.77937	75.7681901787665	28.111960055369998	29.389665	31.888064999999997	0.37102588816022924	1.0850094752696227
feo	3058.98	3619.99	2337.01	2566.93	2.00444	6.01955	4.02489	3.01327	3511.99	3202.07	4076.0	6787.98	3339.4849999999997	2451.9700000000003	5431.99	3357.0299999999997	0.7342359675219384	0.6180110788127371
Hacl	2942.49	2154.21	1281.24	1289.0	2.08521	5.25764	499.505	394.793	2542.76	2244.0	3051.91	4663.74	2548.35	1285.12	3857.825	2393.38	0.5042949359389408	0.620396207707711
alpha-Est8	50.0	30.0	47.0	29.6504	0.0	0.0	0.0	0.0	46.0	24.3496	8.0	17.0	40.0	38.3252	12.5	35.1748	0.95813	2.8139839999999996
Tmem63	863.919	996.931	499.094	506.44	1.00373	5.04085	18.0813	14.069	635.906	677.56	812.996	1239.96	930.425	502.767	1026.478	656.733	0.5403627374586882	0.6397925722713979
Ptr	20.0	8.0	11.0	19.8196436319	1.01363	1.0	0.0	0.0	43.0	48.1804	156.986	221.0	14.0	15.40982181595	188.993	45.590199999999996	1.1007015582821429	0.2412269237484986
Cp38	51009.7	17748.7	1840.15	5955.32	436.149	956.965	4860.26	2274.29	2350.85	7687.68	2727.85	5347.03	34379.2	3897.7349999999997	4037.4399999999996	5019.265	0.11337480220598502	1.2431800844099232
CanB2	3212.701	2253.121	1425.314	1320.437	23.5496	47.7305	12.3004	9.88282	1821.47	1783.56	2050.45	3498.27	2732.911	1372.8755	2774.3599999999997	1802.5149999999999	0.5023491434591174	0.6497047967819606
hpo	1552.21	1462.47	1115.75	1278.8	167.978	238.452	44.1631	59.4994	1329.83	1245.43	1269.37	2029.14	1507.3400000000001	1197.275	1649.255	1287.63	0.7942965754242572	0.7807343315618264
Oseg6	316.923	313.288	113.929	115.044	0.0	1.02578	19.07661	13.7116	655.071200098069	679.9561	874.0000403799	1393.971050832	315.1055	114.4865	1133.98554560595	667.5136500490345	0.363327520465368	0.5886438787827281
l(3)04053	1257.0	1175.0	1036.59	1095.45	88.3387	183.134	0.0	0.0	1193.41	1153.55	1246.66	2421.87	1216.0	1066.02	1834.2649999999999	1173.48	0.8766611842105263	0.6397548881977251
Jhbp1	46.0	15.0	5.0	5.0	0.0	0.0	0.0	0.0	12.0	4.0	2.0	17.0	30.5	5.0	9.5	8.0	0.16393442622950818	0.8421052631578947
CG11241	1097.42553	729.304	435.85065	469.9	0.0	0.0	1.00512	1.00065	248.05784	245.96512	674.40903	1418.6951	913.364765	452.875325	1046.5520649999999	247.01148	0.49583183231290945	0.2360240720560807
Tbcb	928.89	615.79	476.554	481.97	3.04143	1.01393	23.9105	21.9203	602.05	541.79	668.951	1117.98	772.3399999999999	479.262	893.4655	571.92	0.6205324080068364	0.6401142517534252
Polr2H	1007.0	521.0	178.0	204.0	1.0	1.00092	0.0	1.0	388.0	284.0	655.0	1127.0	764.0	191.0	891.0	336.0	0.25	0.3771043771043771
CG11247	955.988	934.9755	513.3587	621.6287	1.00348	4.0167	13.0119	13.0243	634.6409	594.3721	652.9966	1067.983	945.48175	567.4937	860.4898	614.5065	0.6002164505026141	0.7141357166581173
CG11248	994.421	943.864	601.049	583.964	3.17567	6.42127	0.0	0.0	543.848	503.67	703.824	1063.58	969.1425	592.5065	883.702	523.759	0.6113719086718413	0.5926873538817384
Zmynd10	67.0	20.0	4.0	7.0	0.0	2.02984	0.0	0.0	7.60055	7.6558	66.0139	162.132	43.5	5.5	114.07295	7.628175000000001	0.12643678160919541	0.06687102419986508
mael	1963.9913	1624.0031	893.7384	975.3419	1.02058	5.10978	1.00734	0.0	1535.26	1331.66	1780.98	3086.89	1793.9971999999998	934.54015	2433.935	1433.46	0.5209262032293028	0.5889475273579615
Adk2	1799.0473	1279.4536	572.11082	585.545820115003	1.01316	2.01669	33.9564	27.5436	757.889	676.454	989.9867	1838.98	1539.25045	578.8283200575015	1414.48335	717.1714999999999	0.37604557468701827	0.5070201073770151
CG11257	169.0	161.0	107.0	104.0	2.00778	0.0	0.0	4.26204	273.746	209.906	306.016	565.222	165.0	105.5	435.619	241.826	0.6393939393939394	0.5551318927778631
mRpL20	713.858	354.473	151.171	169.827	0.0	0.0	39.1419	19.5275	343.829	303.173	477.0	774.0	534.1655	160.499	625.5	323.501	0.3004668028916132	0.5171878497202238
MICAL-like	1694.28	1464.62	1224.77	1351.03	2.14409	1.05464	140.722	107.382	1994.23	1898.97	1739.86	2959.95	1579.4499999999998	1287.9	2349.9049999999997	1946.6	0.8154104276805219	0.8283739129879719
Cul6	195.0	169.0	9.0	21.0	2.0	1.0	0.0	0.0	59.0	56.0	33.0	63.0	182.0	15.0	48.0	57.5	0.08241758241758242	1.1979166666666667
CG11263	363.0	259.0	3.019	1.0	0.0	0.0	1.0	0.0	206.981	169.0	256.0	382.0	311.0	2.0095	319.0	187.9905	0.006461414790996785	0.5893119122257053
Trf4-1	3194.9899	3798.7038	2900.0178	3137.0261	5.25773	9.72798	53.89896	66.46949	4327.9565028337	4207.39583887494	5445.6607371	8436.2628730562	3496.84685	3018.5219500000003	6940.961805078099	4267.67617085432	0.8632125110083103	0.6148537177847646
Caper	2506.613	2020.89400847143	1260.2753	1220.0726188	68.46052	94.28446654	13.737	20.6296	1025.81	924.784	1635.19	2760.42	2263.753504235715	1240.1739594	2197.8050000000003	975.297	0.5478396641151554	0.4437595692065492
CG11267	5418.43	2616.52	1054.06	1151.73	5.02064	1.0046	126.569	96.4774	1805.94	1527.27	2788.98	5247.0	4017.4750000000004	1102.895	4017.99	1666.605	0.2745244214338608	0.4147857510844975
Icmt	756.905	579.0	380.7867	432.169	0.0	1.096	1.09549	0.0	550.214	465.831	517.0	789.904	667.9525	406.47785	653.452	508.02250000000004	0.6085430475969474	0.777444249921953
RpS12	32161.7	13040.6	3574.49	3943.48	13.1386	22.9175	1158.34	505.361	5858.91	5524.86	15256.8	31818.9	22601.15	3758.9849999999997	23537.85	5691.885	0.1663183068118215	0.2418183903797501
Srrm1	3281.26	2626.93	2085.82	2396.56	0.0	6.03831	152.741	91.0728	2980.18	2753.44	3199.0	6052.96	2954.0950000000003	2241.19	4625.98	2866.81	0.7586722837281806	0.6197194972740911
CG11275	93.0	40.0	13.0	12.4004	2.02477	0.0	16.0	13.0	25.0	17.5996	161.9754	334.0	66.5	12.700199999999999	247.98770000000002	21.299799999999998	0.19098045112781953	0.0858905502168051
RpS4	72522.18	31387.112	11551.128	12600.58793	22.1887	48.331	23.8578	15.8477	15677.9	14704.4	32328.8	67758.7	51954.64599999999	12075.857965	50043.75	15191.15	0.23243076211124605	0.30355738728612464
Syx13	1043.8804	746.0808	645.9661	594.4752	140.8626	255.4055	237.12	154.919	783.034	779.525	779.137	1297.59	894.9806	620.22065	1038.3635	781.2795	0.6929989879110229	0.7524142557013994
CG11279	312.9998	183.0	46.99997	44.99998	11.0	14.0114	6.0	4.0	135.0	123.0	273.0	544.989	247.9999	45.999975	408.9945	129.0	0.18548384495316328	0.31540766440624507
alpha-Est9	162.0	136.8477	61.8291	71.858	2.22608	1.07518	0.0	2.152	26.1709	40.142	145.774	290.925	149.42385000000002	66.84355	218.3495	33.15645	0.44734190693118925	0.1518503591718781
trn	53.5188	60.6984	25.135	34.26	3.28932	1.27513	12.4812	7.3017	13.865	31.7401	41.7107	53.7249	57.108599999999996	29.697499999999998	47.7178	22.80255	0.5200180007914745	0.4778625586259216
caps	428.6651	359.5809	154.9065	168.8304	1.0694	3.400029	51.3363	21.4193	157.094	132.17	287.931	460.6	394.123	161.86845	374.2655	144.632	0.41070541429959684	0.3864422448769657
CAH3	4794.8526	3329.863	2060.293	2253.55596	8.44913	8.32055	1.1685	3.54013	2161.68	2155.38	2867.55	4774.68	4062.3577999999998	2156.92448	3821.1150000000002	2158.5299999999997	0.530953841633546	0.5648953250556447
Gmppb	874.8148	701.99961	424.79861	482.61931	3.12766	2.05642	3.18476	0.0	764.2	670.38	976.872	1458.94	788.407205	453.70896	1217.906	717.29	0.5754754105779639	0.5889534988742974
enok	2064.13	2101.0754	1562.7717	1676.7652	3.23216	1.08275	49.8696	68.9289	1404.23	1466.24	1781.77	3010.92	2082.6027000000004	1619.76845	2396.3450000000003	1435.2350000000001	0.7777616201112194	0.5989266987850247
l(2)dtl	1740.2	1978.8	1334.28	1391.45	0.0	1.14425	93.8044	140.203	2175.72	2114.55	1981.0	3549.86	1859.5	1362.865	2765.4300000000003	2145.135	0.7329201398225329	0.7756967270912661
PolE4	460.0480105775	298.85636283	210.8307	219.8936	0.0	2.85994	1.24203	0.0	352.662	254.832	336.217	529.216	379.45218670375004	215.36214999999999	432.7165	303.74699999999996	0.5675607034204281	0.7019538196486613
TM4SF	42.00001	23.00003	12.0	12.8679	2.26089	0.0	0.0	0.0	0.0	2.13214	6.73911	15.0	32.50002	12.43395	10.869555	1.06607	0.3825828414874822	0.09807853219382026
Sirt7	406.0	511.0	405.052	432.285	1.04023	1.06052	0.0	0.0	556.948	473.715	546.96	723.939	458.5	418.6685	635.4495	515.3315	0.9131264994547437	0.810971603565665
Alg11	1348.558	933.372	578.187	570.494	0.0	1.00403	0.0	5.0	494.863	411.426	784.0	1275.0	1140.965	574.3405	1029.5	453.1445	0.5033813482446876	0.4401597863040311
CG11307	809.0	591.0	432.5614	380.0983	1.04321	1.07097	0.0	0.0	874.439	750.901	915.957	1548.933	700.0	406.32984999999996	1232.445	812.67	0.5804712142857142	0.6593965653639716
CG11309	751.1853	491.248	257.469	287.7938822	5.44795	21.1955	0.0	2.03643	302.142	278.2066	372.9262	676.8043	621.21665	272.63144109999996	524.8652500000001	290.1743	0.43886692525063514	0.5528548517929125
alpha-Est10	197.897	192.000000191971	27.9466	30.03778	4.41596	2.24706	2.10301	0.0	20.0534	16.9622	65.584	127.7529	194.94850009598548	28.99219	96.66845	18.5078	0.1487171739496601	0.19145646795826352
insc	557.036	382.321	78.9932	84.6275	1.05571	3.16365	26.3215	27.0814031151	189.0069	151.0425	685.945	1324.662	469.6785	81.81035	1005.3035	170.0247	0.17418372354706466	0.16912773107822662
Dpp10	27.86373	20.346	30.21653	38.6147	0.0	0.0	2.1362600296008	5.6540100999912	15.78350109733	33.38530509447	6.00000107729	8.00000047915	24.104865	34.415615	7.00000077822	24.5844030959	1.4277456023918824	3.512057194678121
DIP-iota	24.0	17.9462	2.0	1.0	0.0	0.0	0.0	1.05377	1.0	1.0	26.0	34.0	20.973100000000002	1.5	30.0	1.0	0.0715201853803205	0.03333333333333333
LUBEL	18.00001228535	15.00000192525	11.66830621161	11.71963335023	0.0	1.0	1.0	0.0	14.33170032576	8.280363809	19.0000236611084	19.0000050283	16.5000071053	11.69396978092	19.000014344704198	11.30603206738	0.708725136073654	0.5950538700793817
homer	1894.626	1781.0536	1197.00176	1273.045	3.4731099	5.8321662	129.375	164.947	1496.0	1403.96	1578.53	2531.17	1837.8398	1235.02338	2054.85	1449.98	0.6719972981322965	0.7056378811105434
Nhe3	2209.117	1983.38300040594	1254.216	1394.0881	2.42526	2.33649	14.8866	5.61807692	1161.67454032309	1142.50535761887	1301.66876229696	1924.8708621	2096.25000020297	1324.15205	1613.26981219848	1152.08994897098	0.6316765890861245	0.7141334575652736
Nse1	497.0	409.0	255.4564	271.98	0.0	1.00582	0.0	0.0	325.544	302.02	374.0	570.994	453.0	263.7182	472.497	313.782	0.5821593818984548	0.6640931053530498
cort	1235.174	1162.879	809.899	761.1871	2.21352	0.0	1.04639	3.12084	1072.1	1036.81	1317.79	1986.0	1199.0265	785.54305	1651.895	1054.455	0.6551506993381715	0.6383305234291525
Spn27A	2017.001	1351.996	787.738	738.823	7.15494	8.21646	0.0	0.0	867.262	788.177	877.845	1678.78	1684.4985000000001	763.2805000000001	1278.3125	827.7194999999999	0.45312032038022	0.6475095096073925
CG11334	1996.96	1271.127	731.704	822.7	6.98952	3.43019	95.0371	47.8727	830.296	854.3007	1038.01	1978.57	1634.0435	777.202	1508.29	842.29835	0.4756311566980928	0.5584458890531662
Loxl1	30.0	7.0	0.0	2.0	2.0	1.04936	0.0	1.0	3.0	3.0	23.0	56.9506	18.5	1.0	39.975300000000004	3.0	0.05405405405405406	0.0750463411156389
PNPase	1124.22900006245	794.0427	508.312840906	502.1851	1.7545000356731	2.167471	16.0805	12.5366	544.4279	528.67	765.4971	1130.889	959.135850031225	505.24897045299997	948.19305	536.54895	0.5267751908517979	0.5658646728110905
Mul1	434.58	364.031	249.9578	233.5762	13.5874	20.2389	0.0	0.0	201.916	226.515	279.413	391.046	399.3055	241.767	335.22950000000003	214.2155	0.605468745108695	0.6390114831779422
CG11342	257.065	179.113	107.196	114.306	0.0	0.0	0.0	0.0	160.359	127.511	189.73	378.145	218.089	110.751	283.9375	143.935	0.5078247871281908	0.5069249394673123
TP53INP	1128.59375	696.04530101908	281.408130010674	290.26499	3.651943	3.71892	99.40591	67.9544	349.5914	359.7348	871.3483	1671.2811	912.31952550954	285.836560005337	1271.3147	354.6631	0.31330751125346606	0.27897349098535557
Rcd5	2292.9	1673.0	1056.65	1120.98	3.16658	5.42012	1.10473	0.0	813.352	753.022	800.833	1566.58	1982.95	1088.815	1183.7065	783.187	0.5490884792859124	0.6616395195937507
jim	712.00010003373	511.0001	210.638500010154	176.12247	35.21573371	62.4595	0.0	0.0	188.241	205.877215829	460.7839	811.540507166	611.500100016865	193.380485005077	636.1622035830001	197.0591079145	0.31623949857039046	0.3097623637566354
CG11353	81.0	49.0	19.4506	14.5337	4.09044	1.0	0.0	0.0	19.5494	10.4663	33.9096	34.0	65.0	16.992150000000002	33.9548	15.00785	0.26141769230769235	0.44199494622262536
CG11357	2026.00069018444	1982.911	1338.0757	1341.59623149	6.08542	2.03328	0.0	3.0888	1426.9254	1341.4035	1679.9145	2523.9702	2004.45584509222	1339.835965745	2101.9423500000003	1384.16445	0.6684287753334659	0.6585168475243861
CG1136	43.8419	16.0	22.0	18.5862	0.0	0.0	8.15812	4.0	15.0	16.4138	8.0	48.0	29.92095	20.293100000000003	28.0	15.7069	0.6782237863436823	0.5609607142857143
CG11360	1051.999	630.988	521.2098	433.0242	21.14048	53.4619	0.0	1.01227	198.79	237.975	414.86	700.538	841.4935	477.11699999999996	557.6990000000001	218.3825	0.5669883368083056	0.39157771486052506
dbr	1276.83	1375.374276	646.5264	818.172872	10.229807325	16.4816	3.04333	1.01332	1165.95	1232.227	1033.77	1738.519	1326.102138	732.3496359999999	1386.1444999999999	1199.0885	0.5522573375113584	0.8650530301855255
galectin	1730.21	1214.1459	626.997	600.53295	2.00181	0.0	6.00856	3.00568	854.1024	865.5658	1438.999	2283.0	1472.17795	613.764975	1860.9995	859.8341	0.4169095013276079	0.4620281198356045
polybromo	3442.75	3896.79	3298.3	3982.41	1.08121	11.8097	4.25396	3.20709	3960.7	3938.59	3585.92	6180.19	3669.77	3640.355	4883.055	3949.645	0.9919845112908984	0.8088471254163633
Zir	1211.0	1148.0	1255.36	1352.89	2.22805	2.21175	0.0	0.0	1996.639	2152.10559	1864.767	3144.789	1179.5	1304.125	2504.7780000000002	2074.372295	1.1056591776176345	0.828166126898272
Creld	1319.8421	1084.9766	706.4011	721.8782	0.0	0.0	2.00162	0.0	759.682	691.919	1025.0	1572.004	1202.40935	714.1396500000001	1298.502	725.8005	0.5939238995438618	0.5589521617987497
CG11378	390.00013	144.99981	29.98006	25.68072	4.0	5.01081	0.0	0.0	30.02	43.3193	156.0	240.989	267.49997	27.83039	198.49450000000002	36.66965	0.10403885278940404	0.18473887185791038
CG11381	3739.0	1354.0	187.0	420.587	0.0	1.00223	1.00053	0.0	162.0	296.413	134.0	448.998	2546.5	303.7935	291.499	229.2065	0.11929844885136462	0.7863028689635299
CG11382	868.998	545.0	28.0	33.12924	0.0	1.0	1.00212	0.0	210.0	229.871	128.0	136.0	706.999	30.56462	132.0	219.9355	0.043231489719221666	1.6661780303030302
ct	526.0006	330.54163	78.7976	63.7282	28.12	66.5185	0.0	1.45828	46.2024017461575	51.271814865	309.88008426005	603.481855138677	428.271115	71.2629	456.6809696993635	48.73710830557875	0.166396699436524	0.10672025229705269
Xxylt	341.635	151.722	27.5117	19.293	1.11745	0.0	28.3651	15.2778	52.4883	39.707	122.883	293.0	246.67849999999999	23.40235	207.9415	46.09765	0.09486984070358787	0.22168566640136772
EbpIII	74.99998	23.0	20.0	23.0	3.0	5.0	0.0	2.0	14.0	25.0	21.0	23.0	48.99999	21.5	22.0	19.5	0.4387755997501224	0.8863636363636364
Gbp2	12.0	17.0	9.13487	8.0	1.0	6.0	0.0	1.0	6.0	12.0	22.0	43.0	14.5	8.567435	32.5	9.0	0.5908575862068965	0.27692307692307694
CG11396	853.45	657.138	545.145	601.715	11.6153	4.54565	0.0	0.0	454.097	455.264	524.345	852.969	755.2940000000001	573.4300000000001	688.657	454.6805	0.7592142927125066	0.6602423267315949
glu	1951.1	2590.06	2281.07	2761.56	2.07187	4.14011	40.8954	47.9407	3181.93	3370.44	3453.93	5145.86	2270.58	2521.315	4299.8949999999995	3276.185	1.1104277321213083	0.761922093446468
CG11398	514.9387	407.9999	306.6923	322.9617	1.03986	7.14813	1.061	0.0	455.307	375.038	476.96	786.852	461.46930000000003	314.827	631.906	415.1725	0.6822273984423232	0.6570162334271237
Pcif1	3931.68	4065.63	2974.06	3474.36	144.559	273.59	2.22431	3.3427	3764.92	3619.63	4196.44	6635.41	3998.6549999999997	3224.21	5415.924999999999	3692.275	0.80632362631935	0.6817441157327697
SCOT	933.8592	690.43854	332.06575	357.0368	0.0	0.0	33.1409	11.8324	409.934	351.964	572.0	907.933	812.14887	344.55127500000003	739.9665	380.949	0.42424645003815625	0.5148192519526222
CG11400	30.0	16.00001	14.99996	16.0	0.0	0.0	0.0	0.0	35.0	37.0	45.0	133.0	23.000005	15.49998	89.0	36.0	0.6739120274104288	0.4044943820224719
CG11403	798.995	896.0	638.79	662.0	1.00077	1.0	1.00514	0.0	956.21	905.0	1268.0	1843.0	847.4975	650.395	1555.5	930.605	0.7674299924188567	0.5982674381227902
Atf3	253.1764	278.0	221.246	218.0234	2.142841154	2.184491672	0.0	0.0	145.945	129.977	223.857	437.816	265.58820000000003	219.6347	330.8365	137.961	0.8269746170951872	0.4170065878462625
CG11409	255.0004	130.0003	19.0	20.94907	0.0	0.0	0.0	0.0	4.0	1.05095	8.0	18.0	192.50035000000003	19.974535	13.0	2.525475	0.10376362952067358	0.1942673076923077
fs(1)N	7937.98	5168.93	1416.78	1726.77	5.04628	7.0565	1.01535	4.07342	1993.22	2006.23	5051.95	9183.94	6553.455	1571.775	7117.945	1999.725	0.23983913828659845	0.2809413391084084
Naa30A	3313.995	2349.002	1247.98000500961	1371.8485	1.00417	0.0	0.0	1.0029	1424.02	1279.15	2019.0	3543.0	2831.4984999999997	1309.914252504805	2781.0	1351.585	0.4626222660915431	0.4860068320747932
CG11414	3205.98	2521.96	1763.55	1921.78	4.06341	4.05145	1.01818	2.03826	2385.45	2458.22	2592.94	4622.95	2863.9700000000003	1842.665	3607.9449999999997	2421.835	0.6433953567949384	0.6712505318124307
uri	1451.0	1123.99	622.275	756.134	2.02486	0.0	0.0	1.01043	1161.72	1235.87	1091.98	2180.59	1287.495	689.2045	1636.285	1198.795	0.535306544879786	0.7326321514895021
CG11417	3119.95	2283.0	966.6	992.738	0.0	5.12647	1.04614	0.0	886.4	848.262	1690.0	3127.87	2701.475	979.6690000000001	2408.935	867.3309999999999	0.36264226024671714	0.36004748986585355
MTPAP	1045.0	879.999818029	345.548	405.40840707597	0.0	4.19477	0.0	0.0	571.452	538.592	880.0	1506.81	962.4999090145	375.478203537985	1193.405	555.0219999999999	0.39010726133204077	0.46507430419681495
APC10	453.544	240.2	187.898	192.73	0.0	0.0	0.0	0.0	122.344	109.255	150.0	238.0	346.87199999999996	190.314	194.0	115.7995	0.5486577181208054	0.5969046391752577
CG1142	767.0	384.0	175.284	142.291	0.0	0.0	0.0	0.0	465.716	365.709	607.0	1216.0	575.5	158.7875	911.5	415.7125	0.27591225021720245	0.4560751508502468
png	1441.95	991.948	238.879	235.183	0.0	0.0	1.05183	1.05178	1063.12	1016.82	1559.0	2624.0	1216.949	237.031	2091.5	1039.97	0.1947748015734431	0.49723643318192684
CG11426	51.0	38.0	4.16808	6.16548	2.09112	1.0466	0.0	0.0	132.8318	61.8345	101.909	122.9534	44.5	5.166779999999999	112.4312	97.33314999999999	0.11610741573033706	0.8657129871423589
rb	1738.982	1742.833	1501.2833	1731.0352	127.979	199.0	103.019	86.1691	1814.72	1847.97	2249.02	3718.0	1740.9075	1616.1592500000002	2983.51	1831.345	0.9283429762925371	0.6138223099637675
Orai	1791.4703	1664.40704	1323.492	1433.352	45.63654	86.0832	13.47476	9.48477	1332.31441	1315.629	1558.1932	2526.48	1727.93867	1378.422	2042.3366	1323.971705	0.7977262294847537	0.6482632221348821
CG11436	449.012	467.993	332.602	383.0	1.01228	0.0	13.9883	16.0069	324.398	263.0	435.988	608.0	458.5025	357.801	521.994	293.699	0.7803687002797149	0.562648229673138
laza	568.976	360.0	46.886	41.6166	1.06888	0.0	1.0245	0.0	44.114	30.3834	180.931	445.0	464.488	44.2513	312.9655	37.2487	0.09526898434405194	0.11901854996796771
CG11444	3498.99557	1990.99557	1134.61	1040.64	1.0006	5.00442	10.0024	10.0042	845.387	689.36	1637.0	2663.0	2744.99557	1087.625	2150.0	767.3734999999999	0.3962210401672889	0.35691790697674414
Mrm2	343.0	246.0	180.0	174.0	1.0	0.0	0.0	0.0	202.0	192.0	262.0	340.0	294.5	177.0	301.0	197.0	0.601018675721562	0.654485049833887
Rilpl	619.9279	647.902	379.939	403.5509	4.40687	1.10796108852	1.07242	1.09765	549.061	580.449	691.593	1288.892	633.9149500000001	391.74495	990.2425000000001	564.755	0.6179771434638037	0.5703198963890158
Spc105R	1083.994361	1352.003	1107.94066	1530.167	0.0	4.007780512	1.00277	0.0	1913.06	2107.83	1581.0	2596.99	1217.9986804999999	1319.0538299999998	2088.995	2010.445	1.0829681929199757	0.9623981866878571
CG11454	555.0	259.0	280.551	322.0	0.0	1.00186	0.0	0.0	224.449	213.0	316.0	527.998	407.0	301.27549999999997	421.999	218.7245	0.7402346437346436	0.5183057305822999
ND-15	1195.19442	734.2549	324.28323	343.35866	3.007389	3.01386	183.805	91.1121	453.717	454.694	850.993	1396.986	964.7246600000001	333.820945	1123.9895000000001	454.20550000000003	0.34602717111014863	0.4041011948955039
CG11456	452.8587	398.9804	293.2359	264.0841	0.0	1.22691	11.1405	11.0198	452.764	347.916	518.0	796.773	425.91954999999996	278.65999999999997	657.3865000000001	400.34000000000003	0.6542550113043648	0.6089872548341044
CG1146	1204.8974	975.0004	510.26962	549.1889	2.01162	10.03350199638	4.10166	0.0	781.7310026802	601.810683	897.98860906	1536.9631	1089.9489	529.72926	1217.47585453	691.7708428401	0.48601293143192303	0.5682008725398127
IleRS	5112.883	4354.7971	2351.858	2711.534	2.15257016	4.25795038	2.11688	3.20109	2555.14	2350.47	4085.85	6480.74	4733.84005	2531.696	5283.295	2452.805	0.5348080993991337	0.46425668072670556
CG11474	676.906	649.0	522.13	486.916	5.22823	1.05052	2.09403	0.0	640.87	625.084	778.772	1300.95	662.953	504.523	1039.861	632.977	0.7610237829831075	0.6087130876145945
CG11475	7.0	11.0	6.0	4.30705	0.0	1.02849	0.0	0.0	8.80939	10.7568	18.915	38.8128	9.0	5.153525	28.8639	9.783095	0.5726138888888889	0.33893877819698653
Mlh1	800.0	506.9996	295.255	322.9675	0.0	1.025388	0.0	0.0	635.74461	573.0332	836.9998	1402.976	653.4998	309.11125	1119.9879	604.388905	0.47300894353754963	0.5396387809189724
PAN3	4802.514248004	3927.9748013563	3060.54738183849	3214.352851	74.9296	89.89068662	481.478183784	412.015000656712	3678.1556	3440.041513323	4178.27307	7095.979	4365.24452468015	3137.450116419245	5637.126035	3559.0985566615	0.7187341049695566	0.6313675682543968
mRpL10	1446.0	882.0	560.515	459.0	0.0	4.00369	0.0	0.0	551.485	500.0	742.0	1131.0	1164.0	509.7575	936.5	525.7425000000001	0.4379359965635739	0.5613908168713295
Srpk79D	141.59026	118.00002	42.126670025165	41.28365	7.5014165	4.30988	0.0	0.0	116.873345272305	118.8106	223.49861	365.69060384461	129.79514	41.705160012582496	294.594606922305	117.84197263615249	0.3213152666007564	0.40001401881478293
Tbc1d15-17	1379.9954	1465.9873	1097.55	1179.8791	88.7152	168.3302	0.0	1.01538	1300.45	1331.12	1410.28	2329.67	1422.99135	1138.7145500000001	1869.975	1315.7849999999999	0.8002259114224413	0.7036377491677696
br	654.712325358	395.734623523	103.069942	112.54078	49.894098	95.7553	4.71448	0.0	51.93008	82.45926	392.1064	898.2441	525.2234744405	107.805361	645.17525	67.19467	0.2052561742691353	0.10414948496551905
rasp	932.915	628.0	251.881	249.905	1.01037	1.00623	2.0845	0.0	398.119	303.095	584.99	807.994	780.4575	250.893	696.492	350.607	0.32146913829388535	0.5033898451094916
CG11498	11.1223	4.36056	3.64881	2.0	0.0	1.05107	24.0	15.0647	6.0	0.0	27.5982	38.2451	7.741429999999999	2.824405	32.92165	3.0	0.3648428003611736	0.09112544480607745
Spase12	920.164	454.825	249.025	254.17	2.68497	1.17471	0.0	0.0	245.497	292.703	451.0	785.995	687.4945	251.5975	618.4975	269.1	0.3659629277034216	0.43508664141730574
CG11504	796.9461	688.01800118262	580.8911	654.1811	7.90552	9.01054	233.055	213.982	1318.11	1172.82	1301.09	2224.99	742.48205059131	617.5361	1763.04	1245.465	0.8317185573822243	0.7064303702695344
Larp4B	4956.758	5270.817	3752.275	4038.41	847.799	1640.102	66.24518	74.1808	3432.722	3168.5919768	4214.19800008262	6108.8993574	5113.7875	3895.3424999999997	5161.54867874131	3300.6569884	0.7617333532142271	0.6394702818544171
Ptp99A	1080.92674	923.32099128106	409.337040055099	527.03257	0.0	1.16809	65.90239	76.57538	557.67395	465.2688619	855.68243819945	1486.92047138039	1002.1238656405301	468.1848050275495	1171.30145478992	511.47140594999996	0.4671925508213484	0.43666931673173365
pygo	2814.52	2897.49	2488.74	2742.11	3.19839	6.36492	49.475	64.5109	3897.26	3669.89	3836.8	6260.64	2856.005	2615.425	5048.72	3783.575	0.9157634527950756	0.7494127224326165
RpL6	47963.3	21342.9	7433.81	7665.3	169.5072	270.481	636.69	262.087	10995.2	10160.7	22672.5	49021.5	34653.100000000006	7549.555	35847.0	10577.95	0.21786088401903433	0.2950860602002957
CG11523	957.928	579.879	424.84	540.911	0.0	4.54509	0.0	0.0	457.042	446.249	473.673	936.893	768.9035	482.8755	705.283	451.64549999999997	0.6280053348697203	0.6403748566178399
CycG	14674.302	12501.709	5025.10601	5675.497	635.9842	1228.43505	6.64792	16.28514	6432.679	5760.14544	9640.021	16437.569	13588.0055	5350.301505	13038.795	6096.41222	0.3937517912397077	0.467559480764902
Strip	1236.5329146859	1369.671	1345.18856	1413.6637	163.03188	279.121	121.538	108.164	1437.31	1491.66	1274.38	2000.46	1303.10195734295	1379.42613	1637.42	1464.4850000000001	1.0585711442047685	0.8943856799110796
Tig	35.00000109109	8.00000031484	11.00000160058	13.00000400812	0.0	1.05560013321	0.0	0.0	13.0	11.0	15.0	56.9444	21.500000702965	12.00000280435	35.9722	12.0	0.5581396470696448	0.3335909396700786
Asator	698.8509	549.1113	47.08730113	55.525	4.318994	7.61833	7.35176	2.16683	100.781093	104.57	492.1867	963.34763	623.9811	51.306150564999996	727.767165	102.6755465	0.08222388557121361	0.14108296092198663
DEF8	353.656	371.375	292.361	262.05	0.0	0.0	14.3439	11.6248	237.639	203.95	255.0	442.0	362.5155	277.20550000000003	348.5	220.7945	0.7646721312605945	0.6335566714490675
CG11537	1903.93232	1477.15028237063	990.65640002856	1002.86678	72.14654	89.71807	49.0636	15.85254	1188.3412	1113.12987625	1220.8547	2222.278	1690.541301185315	996.76159001428	1721.56635	1150.735538125	0.5896109070600082	0.668423577241156
Mnat9	129.0	87.9941	58.1665	61.1951	0.0	0.0	0.0	0.0	66.1575	39.1037	58.0	116.682	108.49705	59.6808	87.34100000000001	52.6306	0.5500684119982986	0.6025875591074066
kermit	581.60037	572.60158	497.5625	420.39836	174.93433	266.38	0.0	0.0	394.067	348.81514	445.94819	661.243	577.1009750000001	458.98043	553.595595	371.44106999999997	0.7953208361846902	0.670961028871626
CG11555	1204.99977	696.0	447.575	398.576	0.0	3.0	0.0	0.0	343.425	305.424	353.0	746.0	950.499885	423.07550000000003	549.5	324.42449999999997	0.445108417872139	0.5903994540491355
CG11560	238.0000298068	232.9998	147.0000759125	177.367182702	0.0	0.0	2.0	1.0	376.0003	326.633	438.0002	636.9999	235.4999149034	162.18362930725	537.50005	351.31665	0.6886780803032404	0.653612311291878
smo	1072.88	1314.58	906.459	929.863	1.01955	2.05066	0.0	2.04929	1216.12	1222.07	1316.16	1961.38	1193.73	918.1610000000001	1638.77	1219.0949999999998	0.7691529910448762	0.7439085411619689
CG11562	534.16	304.403	157.899	191.89	7.40289	4.09065	79.1642	55.4189	362.998	362.081	437.597	704.708	419.2815	174.8945	571.1524999999999	362.5395	0.4171290648406858	0.6347507889749235
CG11563	1458.0	786.0	385.424	403.424	1.01098	1.0044	1.00197	0.0	548.576	467.576	770.989	1672.0	1122.0	394.424	1221.4945	508.076	0.351536541889483	0.41594620360550133
Cpr	4180.723	4436.18233	3376.11927	3604.6728	382.79253	572.23687	5.274323858	7.8214693662	2469.8772	2646.320282	3192.2043	5279.7628	4308.452665	3490.3960349999998	4235.98355	2558.098741	0.8101275112883246	0.6038972320843881
Rift	837.981	697.0	309.956	380.321	3.0644	2.04205	1.01852	0.0	437.044	425.679	844.936	1270.96	767.4905	345.1385	1057.948	431.3615	0.44969742296484455	0.4077341230381833
CNPYb	826.598	597.811	392.128	366.118	0.0	0.0	17.4017	10.189	350.872	329.882	471.0	748.0	712.2045	379.123	609.5	340.377	0.5323232301958215	0.5584528301886793
arm	11783.399	8680.1786	5402.4598	5798.3898	15.9497	14.7662	3.59325	4.82392532565	5556.543	4981.6083	7722.043	13218.2277	10231.788799999998	5600.4248	10470.13535	5269.07565	0.5473553949823515	0.5032480931586046
CG11583	2601.8	1454.62	631.938	667.922	0.0	2.29302	1.21074	2.33692	1033.24	869.833	1521.1	2795.73	2028.21	649.9300000000001	2158.415	951.5364999999999	0.32044512156039073	0.4408496512487172
CG11586	742.946	419.444	270.322	306.626	1.10195	5.45744	1.11857	2.26358	229.276	197.451	293.898	529.609	581.195	288.474	411.75350000000003	213.3635	0.4963463209421966	0.5181826019693822
VhaM9.7-c	628.0	345.0	239.136	203.587	2.1146	1.04748	0.0	0.0	220.864	207.413	324.885	458.953	486.5	221.36149999999998	391.919	214.13850000000002	0.45500822199383345	0.5463845845697709
CG11590	564.0	323.0	199.0	198.0	1.0	2.0	0.0	0.0	122.0	115.0	194.0	358.0	443.5	198.5	276.0	118.5	0.447576099210823	0.42934782608695654
CG11593	1332.77	1408.77	1138.35	1138.23	0.0	6.46397	1.23076	1.22635	1244.65	1136.77	1189.0	2086.54	1370.77	1138.29	1637.77	1190.71	0.8304018909080297	0.7270312681267822
CG11594	37.9637	37.53256	17.72314	32.7936	0.0	2.08543	4.45682	3.43648	60.4025	65.1148	87.0	109.6298	37.74813	25.25837	98.3149	62.75865	0.6691290402994796	0.6383432216276476
CG11596	3954.9576	2364.7791	910.604	952.869	0.0	3.14359	3.043201	5.221625	1132.395	1089.13	2260.997	4220.853	3159.86835	931.7365	3240.925	1110.7625	0.29486560729658245	0.3427300847751799
CG11597	79.65886	64.8766	9.5203717	13.64647	0.0	9.49432	0.0	0.0	16.0	12.0	48.0	81.0	72.26773	11.58342085	64.5	14.0	0.16028483044921987	0.21705426356589147
CG11601	580.499	332.292	208.58832	183.5304	1.05671	0.0	0.0	0.0	120.608	136.624	183.767	300.573	456.39549999999997	196.05936	242.17	128.61599999999999	0.42958214969253644	0.5310979890159805
mbm	3357.96	2379.0	1080.96	1063.99	1.01152	3.04351	3.04474	0.0	1059.04	971.013	1630.99	3174.96	2868.48	1072.475	2402.975	1015.0264999999999	0.373882683511825	0.4224041032470167
Rpp30	579.9998	259.9995	57.1008	56.2775	0.0	0.0	0.0	0.0	30.8991	29.7225	179.0	356.0	419.99965000000003	56.68915	267.5	30.3108	0.1349742791452326	0.11331140186915888
CG1161	1081.487	579.462	339.4241	376.521	22.4347	41.4078	59.5135	41.5382	562.576	486.479	615.565	945.592	830.4745	357.97255	780.5785000000001	524.5275	0.4310458057411757	0.6719727740387418
nkd	217.42	112.907	161.627	133.238	0.0	5.813787	13.5804	10.0929	40.37284259	29.762	50.00001	92.1862	165.1635	147.4325	71.09310500000001	35.067421295	0.892645772219649	0.4932605109173386
Pi3K68D	2263.687	2253.748	1282.4369	1554.874	4.2959723075	5.364273514	5.312950328	4.254688816	1920.56400019821	2099.1234	2683.706	4471.63260002008	2258.7174999999997	1418.65545	3577.66930001004	2009.8437000991048	0.6280800719877542	0.5617745888624934
Rlip	1056.0002	860.0	575.7625	637.5997	0.0	1.146779	0.0	0.0	603.238	619.4	699.0	1108.85	958.0001	606.6811	903.925	611.319	0.6332787439166239	0.6762939403158448
Ubi-p63E	11797.8038	12425.597	8541.2517	8903.6117	108.5586	103.4811	142.9212	143.3392	10784.3600036204	10227.7600285757	8885.9000848221	14076.0000632821	12111.7004	8722.431700000001	11480.9500740521	10506.06001609805	0.7201657415502122	0.9150862906235101
step	2764.04	2088.2532	1549.911	1640.759	78.3573	172.886	18.9606	13.7488	1847.0923000532	1901.24054	2199.638	3794.115501	2426.1466	1595.335	2996.8767505	1874.1664200266	0.6575591928369044	0.6253732055260242
Polr2F	1020.97	568.0	253.16	310.441	2.03358	5.08681	1.02772	0.0	373.84	332.559	634.966	1165.91	794.485	281.8005	900.4380000000001	353.1995	0.3546958092349132	0.39225299243257167
TRAM	1961.9975	1344.9364	578.4563	598.0576	11.31245	18.67359	0.0	2.06562	560.544	509.942	1116.69	1504.33	1653.46695	588.25695	1310.51	535.2429999999999	0.3557718223518166	0.40842343820344745
Dph1	819.857	1062.3477	575.3857	503.032	0.0	1.0184225	14.1434	21.6528	712.6142	573.9682	913.9999	1407.9837	941.10235	539.20885	1160.9918	643.2912	0.5729545250843333	0.5540876343829474
Ahcy	22174.1178	10308.429	3914.514	4276.501	27.9537	93.7156	6.91935	4.57552	3286.49	3018.5	8095.05	15653.3	16241.2734	4095.5075	11874.175	3152.495	0.25216664969139674	0.26549170784496606
CG11655	492.0	535.993	280.996	265.45	0.0	1.01317	0.0	1.0075	376.004	273.55	722.0	999.987	513.9965	273.22299999999996	860.9935	324.77700000000004	0.5315658764213375	0.37721190694238693
CG11658	132.48049181	97.599197	59.54	55.5038	5.860226743	0.0	5.51952472	2.4008	46.46	51.4962	66.1398	114.0	115.039844405	57.5219	90.06989999999999	48.9781	0.5000171922824673	0.543778776261548
RIOK1	1165.816	995.918	552.757	555.879	0.0	1.00152	121.184	92.0823	935.243	733.121	1221.0	2091.0	1080.867	554.318	1656.0	834.182	0.5128457062709844	0.5037330917874396
Ogdh	3947.32427613	3190.011108	1790.8987507	1818.7444	7.76520122232	9.26086	2.67874	7.98505	1757.09760002829	1584.258777	2622.2353	4345.73000009543	3568.6676920649998	1804.8215753499999	3483.9826500477147	1670.678188514145	0.5057410022690134	0.47953114476366987
hrm	3661.587	3307.612	1923.6816	1918.6099	3.45019	5.80231	3.41638	3.38595	1706.3195	1839.39	2324.5524	3734.1983	3484.5995000000003	1921.14575	3029.3753500000003	1772.85475	0.5513246931247048	0.58522122390677
Ras64B	1116.0	796.0	1238.23	1152.38	569.847	946.199	0.0	0.0	365.771	361.625	305.153	558.801	956.0	1195.305	431.97700000000003	363.698	1.2503190376569038	0.8419383439396078
CG11670	21.6515	13.0	3.0	7.0	0.0	0.0	5.34851	9.0	9.0	6.0	22.0	64.0	17.32575	5.0	43.0	7.5	0.28858779562212317	0.1744186046511628
CG11674	7190.0	4133.0	1206.58	1256.41	1.00158	4.00194	1.00097	2.00097	1851.42	1695.48	2532.0	4132.0	5661.5	1231.495	3332.0	1773.45	0.21752097500662368	0.5322478991596639
Arp6	1070.99	642.996	416.483	449.553	0.0	1.00196	2.00648	3.00403	514.517	419.447	616.0	1179.0	856.9929999999999	433.01800000000003	897.5	466.982	0.5052760057550062	0.5203142061281337
CG11679	484.943	362.129	245.041	261.439	1.06534	1.08296	35.0573	31.8714	454.959	419.561	445.935	674.917	423.536	253.24	560.426	437.26	0.5979184768236939	0.780227898063259
mle	1233.779	1079.0	556.375	610.726	16.88285	13.658	5.22579	0.0	712.625	757.275	1010.12	1496.34	1156.3895	583.5505	1253.23	734.95	0.5046314412228752	0.586444627083616
CG11686	35.76527	27.81628	8.0	5.0	0.0	2.0	11.2347	7.18367	11.0	10.0	1.0	5.0	31.790775	6.5	3.0	10.5	0.20446182894251555	3.5
CG11695	510.8271	373.9999	244.6223	227.1194	3.38235	2.19771	1.17287	0.0	198.378	200.881	260.618	384.802	442.4135	235.87085000000002	322.71000000000004	199.6295	0.5331456883662005	0.6186033900405937
CG11696	1167.0	949.882	667.893	772.394	2.10615	2.10861	0.0	2.11773	849.107	757.606	911.894	1494.89	1058.441	720.1435	1203.392	803.3565	0.6803813344343237	0.6675767331011009
CG11699	856.9712	451.13374	237.5481	270.71669	1.0	3.01059	0.0	0.0	309.504	270.0	280.0	604.989	654.05247	254.13239500000003	442.4945	289.752	0.38855047057616043	0.654814918603508
CG11710	980.9998	835.0	475.802	516.8008	0.0	1.999995041	0.0	0.0	771.199	620.2	957.0	1394.0	907.9999	496.3014	1175.5	695.6995	0.5465875051307825	0.5918328370905998
Mob2	1606.13068	1312.39454	993.6791	1072.878	3.88469	8.32363	61.8687	75.6095	994.3212	881.1226	1496.115	2861.68	1459.26261	1033.27855	2178.8975	937.7219	0.7080826596386239	0.43036531089691
Cyp4g15	47.99997	13.0	44.14703	59.8796	0.0	0.0	0.0	0.0	51.853	38.1204	26.0	28.0	30.499985	52.013315000000006	27.0	44.9867	1.705355428863326	1.666174074074074
CG1172	1667.8823	1505.96615	1076.875	1155.67186	20.45086	44.47266	3.11451	1.03603	1304.12	1283.33	1523.55	2560.53	1586.924225	1116.27343	2042.04	1293.725	0.7034194906187156	0.633545376192435
CG11722	449.0	273.978	112.32	96.0356	0.0	3.0629	0.0	1.02234	142.68	117.964	218.0	385.937	361.48900000000003	104.17779999999999	301.9685	130.322	0.28819078865470316	0.4315748165785504
CG11723	809.0	783.987	538.269	484.604	2.00714	2.0025	0.0	2.01347	384.7307	334.3958	473.993	677.997	796.4935	511.4365	575.995	359.56325000000004	0.6421100737168602	0.6242471722844817
Evi5	1258.73871	1547.47485	1206.67100529628	1320.68359026886	392.435	629.3225	58.2611	93.525	1426.8116	1521.9998443	1779.5770139804	2728.44	1403.10678	1263.67729778257	2254.0085069901997	1474.40572215	0.9006280318754998	0.6541260681037929
HERC2	2519.31	1516.77	843.804	1261.12	11.2423	4.52723	26.6855	19.2347	727.196	831.881	1277.76	2579.47	2018.04	1052.462	1928.6149999999998	779.5385	0.5215268280113378	0.4041960163122241
CG11737	1210.0001	961.0	859.294	869.883	141.72738	214.346	0.0	0.0	590.578	580.312	660.197	1101.8	1085.50005	864.5885000000001	880.9984999999999	585.4449999999999	0.7964886781902958	0.6645244004388202
l(1)G0004	1292.97	763.962	291.454	335.0	5.0	15.0104	49.0349	32.0384	367.546	384.0	797.0	1492.99	1028.466	313.227	1144.995	375.773	0.3045574671403819	0.3281874593338836
Sfxn1-3	1308.8205	791.68852	549.1894	575.5999	8.17509	14.2358	1.18067	2.31156	458.8099	442.4005	721.825	1334.769	1050.25451	562.39465	1028.297	450.6052	0.5354841561213577	0.43820530449860307
Pa1	879.0	997.0	656.392	575.0	1.0	2.00294	0.0	0.0	808.608	729.0	1117.0	1624.0	938.0	615.696	1370.5	768.804	0.6563923240938166	0.5609660707770886
NdufV3	830.0	355.997	211.0	242.0	1.0	0.0	1.0	1.00272	218.0	238.0	309.0	711.0	592.9985	226.5	510.0	228.0	0.381957121308064	0.4470588235294118
Sys1	337.0	225.0	152.886	143.87	0.0	3.341875	0.0	0.0	147.114	157.13	159.0	301.658	281.0	148.378	230.329	152.122	0.5280355871886121	0.6604552618211341
CG11755	260.0004	213.0004	138.6355	171.9995	5.02704	5.0	0.0	0.0	155.521	170.0	186.973	273.432	236.5004	155.3175	230.20250000000001	162.76049999999998	0.656732504469337	0.7070318523908297
Kap3	1000.2468	1486.5376	950.1479	1025.74	0.0	2.13767	43.8123	62.6063	1162.85	1079.01	1373.0	1744.86	1243.3922	987.9439500000001	1558.9299999999998	1120.9299999999998	0.7945553703811236	0.7190380581552731
Obp84a	13.5005	6.80095	4.34687	4.05798	0.0	0.0	0.0	1.00676	25.4917	29.48811	41.8119	78.5018	10.150725000000001	4.202425	60.156850000000006	27.489905	0.4140024481009976	0.4569704863203442
CG11760	38.3387	17.3575	0.0	0.0	0.0	0.0	22.2387	7.71999	819.066	673.061	798.16	1452.46	27.848100000000002	0.0	1125.31	746.0635	0.0	0.6629848663923719
trsn	772.993	493.0	281.718	322.265	2.01284	0.0	1.00683	0.0	422.282	420.735	594.987	1054.0	632.9965	301.9915	824.4935	421.5085	0.47708241672742263	0.5112332601773089
Prx6c	113.246	111.293	57.1279	45.7286	17.0636	7.17273	0.0	0.0	0.0	0.00114775	4.79387	0.0	112.2695	51.42825	2.396935	0.000573875	0.45807855205554493	0.00023942034306312016
lin	1289.85	1641.77	1273.33	1466.01	0.0	1.13368	4.291960131554	4.177532	1489.12	1416.24	1494.410816662	2498.0726	1465.81	1369.67	1996.241708331	1452.6799999999998	0.9344116904646579	0.7277074684580875
CG11771	2197.0	2174.99	1196.68	1267.98	141.838	233.891	1.00197	1.00549	1048.32	889.016	1750.16	2647.11	2185.995	1232.33	2198.635	968.6679999999999	0.5637387093749071	0.44057699436241116
CG11777	377.627	268.864	133.143	138.583	0.0	0.0	0.0	0.0	199.049	211.103	267.791	427.893	323.2455	135.863	347.842	205.07600000000002	0.42030902209002136	0.5895665273313747
CG11779	2285.4117	1695.155	845.0174	933.71059	7.29071	11.0447	176.9246	147.9043	1419.754	1295.173	2214.686	3499.396	1990.2833500000002	889.3639949999999	2857.041	1357.4634999999998	0.4468529543795861	0.47512916335467353
beta4GalT7	913.0	572.0	320.0	397.536	0.0	1.00235	0.0	0.0	415.0	349.464	610.0	864.998	742.5	358.76800000000003	737.499	382.23199999999997	0.4831892255892256	0.5182813807205162
EMC6	619.97	352.0	208.805	259.567	2.20338	2.41758	1.03033	0.0	321.195	296.433	374.797	648.582	485.985	234.186	511.6895	308.81399999999996	0.4818790703416772	0.6035183446211031
Hr96	1474.77	1462.0	951.243	1094.97	9.37175	21.3381	1.23356	0.0	949.757	1013.03	1153.63	1943.66	1468.385	1023.1065000000001	1548.645	981.3934999999999	0.6967563002890932	0.6337110829144187
GstE13	894.9999	528.9997	188.232	208.662	1.18961	0.0	0.0	0.0	272.768	239.338	504.81	949.0	711.9998	198.447	726.905	256.053	0.27871777492072325	0.3522509819027246
bai	2576.76	1326.84	811.545	848.149	1.14709	7.83062	2.24124	1.16159	1116.46	979.851	1288.85	2370.17	1951.8000000000002	829.847	1829.51	1048.1555	0.4251700993954298	0.5729159720362283
CG11788	282.656	239.091	146.043	156.321	1.10029	0.0	0.0	0.0	164.553	201.021	216.508	375.884	260.87350000000004	151.18200000000002	296.196	182.78699999999998	0.5795222588725953	0.6171150184337397
CG11790	1507.99674	806.99953	441.5016	489.40847	2.0	1.01515	0.0	0.0	742.904	691.497	930.219	1624.67	1157.498135	465.455035	1277.4445	717.2004999999999	0.40212162847242944	0.5614337844031579
CG11791	637.65	428.8514	233.5391	204.61577	1.3344157	0.0	0.0	0.0	114.20165	79.38249	150.5423	367.0298	533.2507	219.07743499999998	258.78605000000005	96.79207	0.4108338441937347	0.37402352251985754
Sod1	7360.78	4106.94	2090.05	2120.34	6.31883	8.35498	3.21583	1.06296	3340.95	3079.66	4834.68	8489.65	5733.86	2105.195	6662.165	3210.305	0.3671514477158494	0.4818711334828843
chn	2629.434	3605.6035	2818.4782	2848.5995	16.0062	56.2386	13.5677	16.4003	2806.51	2833.40228	2982.99916	4908.76	3117.51875	2833.53885	3945.87958	2819.9561400000002	0.9089083586105134	0.7146584387149494
FoxK	2271.726567	2027.81920014074	1194.46144258	1465.9014	85.906304	144.719101240661	59.2766	54.1763631	1575.538	1342.1013	2118.0903	3982.284	2149.77288357037	1330.18142129	3050.1871499999997	1458.81965	0.6187543956182096	0.4782721774957317
BORCS5	725.0	591.281	397.169	408.632	0.0	2.61147	0.0	2.71923	451.831	383.368	544.0	941.389	658.1405	402.90049999999997	742.6945000000001	417.59950000000003	0.6121800740115522	0.5622762791430393
ced-6	9357.8604	7626.0145	4307.0837	4446.968	3.6387025	10.5288	6.13741	5.98496	4868.920773045	4734.0285	7161.3649	11627.4463	8491.93745	4377.02585	9394.4056	4801.4746365225	0.5154331241570792	0.5110993543351482
CG11807	1014.4710087645	996.3929	853.202481	834.6044	3.26825	4.47822	0.0	0.0	533.805	429.351	320.371	888.184	1005.4319543822501	843.9034405	604.2774999999999	481.578	0.8393441613047845	0.7969484218757111
CG11808	240.0	173.0	93.2837	86.4003	1.0	0.0	0.0	1.0	211.716	177.6	270.0	431.0	206.5	89.842	350.5	194.65800000000002	0.43507021791767553	0.5553723252496434
CG11811	2592.97	1763.0	920.859	1114.99	1.0	2.00554	14.0267	8.0	1232.14	1145.01	1574.0	2551.99	2177.9849999999997	1017.9245000000001	2062.995	1188.575	0.4673698395535324	0.5761405141553907
PQBP1	362.0	287.0	192.487	190.0	0.0	0.0	0.0	0.0	201.513	182.0	242.0	339.0	324.5	191.24349999999998	290.5	191.75650000000002	0.5893482280431432	0.6600912220309811
Cyp12a5	8.0	9.0	8.0	6.0	1.04809	0.0	0.0	0.0	17.0	8.0	20.9519	33.0	8.5	7.0	26.975949999999997	12.5	0.8235294117647058	0.4633757105866522
nAChRbeta3	8.64731	4.65353	13.4292	14.7459	0.0	0.0	0.0	0.0	27.54321	20.1447	13.96357	15.90896	6.6504199999999996	14.08755	14.936265	23.843955	2.1182947843895574	1.596380018699454
CG11825	349.00048	292.0005	111.0	87.53175	2.0	6.0	0.0	0.148026	31.3295	148.0	38.1337	462.272	320.50049	99.265875	250.20284999999998	89.66475	0.30972144535566853	0.3583682200262707
CG11836	626.0	414.0004671	178.659100139013	185.8935	1.01987	1.02042	0.0	0.0	465.341	311.107	635.98	1101.98	520.00023355	182.27630006950648	868.98	388.22400000000005	0.3505311888518218	0.44675826831457577
CG11837	1147.0	668.0	272.388	302.505	0.0	0.0	0.0	0.0	320.612	304.495	611.0	1164.0	907.5	287.4465	887.5	312.5535	0.31674545454545455	0.35217295774647883
rempA	49.1403	16.61437	16.9065	11.07125	4.28644	0.0	7.49647	1.11869	0.00054464345	41.28746	7.77836583	102.0	32.877335	13.988875	54.889182915	20.644002321725	0.42548688937226814	0.3761032907648449
CG11839	441.0	314.0	170.948	167.0	0.0	2.0112	1.0	0.0	207.052	172.0	215.0	389.989	377.5	168.974	302.4945	189.526	0.44761324503311256	0.626543623107197
Spp	2004.61	1290.92	771.476	797.905	3.24167	4.30917	4.38912	1.08213	894.524	814.095	1417.76	2168.69	1647.7649999999999	784.6904999999999	1793.225	854.3095000000001	0.47621505493805244	0.4764095414685832
CG11843	6.0	5.0	0.0	0.0	0.0	0.0	0.0	0.0	5.0	8.0	26.0	58.0	5.5	0.0	42.0	6.5	0.0	0.15476190476190477
Clbn	2201.704	1930.76	1200.937506	1412.24748	1.1176718	2.2650066	3.29997	2.24145	1135.07	1186.75	1288.88	2144.73	2066.232	1306.592493	1716.805	1160.9099999999999	0.6323551726040445	0.6762037622211025
Alg9	1726.0	1357.0	977.464	1030.19	2.03751	4.07471	0.0	0.0	1383.54	1253.81	1420.96	2083.93	1541.5	1003.827	1752.445	1318.675	0.6512014271813169	0.7524772532090879
Jhbp7	74.0	18.0	72.9302	77.0	0.0	0.0	0.0	0.0	87.0698	52.0	19.0	28.0	46.0	74.9651	23.5	69.5349	1.6296760869565219	2.9589319148936166
Nup358	13729.90009211	14231.9252	10888.900374227	13407.021	10.0811	31.25274202	11.0858	9.08174	15133.1	16322.0	16005.9	24813.7	13980.912646055	12147.9606871135	20409.8	15727.55	0.868896115343464	0.7705881488304638
CG11857	2607.84	2069.92	1347.56	1306.106	3.295	6.49546	2.16583	1.08531	1724.44	1549.89	2150.7	3382.5	2338.88	1326.833	2766.6	1637.165	0.5672941749897387	0.5917606448348153
CG11858	807.0	408.0	156.0	142.612	2.00694	1.0	0.0	0.0	156.0	133.388	311.993	623.0	607.5	149.30599999999998	467.49649999999997	144.69400000000002	0.24577119341563783	0.3095081995266275
RIOK2	1628.07	1122.0	583.684	569.436	18.7235	25.6239	0.0	0.0	780.316	656.564	1045.28	1902.38	1375.0349999999999	576.56	1473.83	718.44	0.419305690400608	0.4874646329630962
dmpd	1416.625	1417.797	1178.262	1148.3412	3.34189	2.25123	25.37680901028	37.2022	1449.729	1327.6558	1543.659	2484.747	1417.211	1163.3016	2014.203	1388.6924	0.8208386753983704	0.6894500703255828
Bicra	3281.330326	2966.8692	2103.21335	3004.70934	12.508405221	42.0305	4.66439	1.1372	2551.79	3147.29	2562.49	4993.97	3124.099763	2553.9613449999997	3778.23	2849.54	0.8175031333018284	0.7541997178573036
alpha-Man-Ib	2264.0	2296.99	1483.5	1603.55	1.00175	3.0	1.00138	2.00637	1428.5	1475.45	1646.0	2651.0	2280.495	1543.525	2148.5	1451.975	0.6768377040949444	0.6758087037468
Pdhb	3466.8494	1899.7204	976.0297	1141.4261	6.57668	7.65008	2.15379	3.27801	1064.97	1065.574	1732.419	3322.35	2683.2849	1058.7278999999999	2527.3845	1065.272	0.39456410312598555	0.42149186243723497
Atg14	556.0	466.0	332.085	379.828	2.07485	0.0	0.0	0.0	394.915	363.172	455.925	786.0	511.0	355.9565	620.9625	379.0435	0.6965880626223092	0.6104128671216056
CG11878	3.0	13.0	2.0	9.0	1.0	0.0	0.0	0.0	10.0	12.0	15.0	59.0	8.0	5.5	37.0	11.0	0.6875	0.2972972972972973
Ctl2	2895.981	2649.999	1417.988	1361.803	15.1823	13.1787	1.0144269	0.0	1082.013	1044.20433	1471.82	2135.818	2772.99	1389.8955	1803.819	1063.108665	0.5012262936397175	0.5893654878898603
dgt6	842.0	830.0	557.0	611.472	0.0	1.00078	1.0	0.0	741.0	717.528	914.0	1345.0	836.0	584.236	1129.5	729.264	0.698846889952153	0.6456520584329349
CG11882	527.947	324.9997	233.9684	255.5114	0.0	0.0	1.05337	0.0	232.032	215.489	265.0	481.0	426.47335	244.7399	373.0	223.7605	0.573869152668039	0.5998941018766756
CG11883	1103.0626	925.681	438.4276	389.3677785	22.44297	26.9011	20.9376	23.31876	439.573	369.633	897.557	1622.1024	1014.3718	413.89768925	1259.8297	404.60299999999995	0.4080335132049215	0.3211568992221726
CG11885	454.0	208.0	139.0	136.0	0.0	1.0	3.87176	1.91276	237.395	221.608	396.088	631.731	331.0	137.5	513.9095	229.50150000000002	0.41540785498489424	0.44657960205055564
Slbp	2488.0	1610.0	1246.4	1290.5	0.0	1.00231	1.00149	0.0	1527.6	1387.5	1694.0	2803.0	2049.0	1268.45	2248.5	1457.55	0.6190580771107858	0.6482321547698465
Elp2	3187.72	1692.25	368.299	387.828	0.0	2.05656	125.284	57.7516	189.701	206.172	544.0	952.943	2439.9849999999997	378.0635	748.4715	197.9365	0.1549450099078478	0.26445429117875563
Rpn2	7556.99	7178.84	4874.764	6015.25	10.48632	8.20178	7.00461	1.15369	5678.24	5653.76	5977.51	9529.8	7367.915	5445.007	7753.655	5666.0	0.7390159902767608	0.7307521420542957
CG11892	240.0	189.0	100.0	104.0	1.0	0.0	0.0	0.0	180.0	173.0	97.0	305.0	214.5	102.0	201.0	176.5	0.4755244755244755	0.8781094527363185
stan	5.0	4.0	40.22194737	80.6892000184253	1.0	0.0	0.0	0.0	39.7781123	68.3109	1.0	3.99999998	4.5	60.455573694212646	2.49999999	54.044506150000004	13.434571932047255	21.61780254647121
m-cup	1071.828	989.583	723.357	808.405	6.80807	17.60883	63.1713	73.4165	1185.64	1165.59	1268.19	2034.39	1030.7055	765.881	1651.29	1175.615	0.7430648230750684	0.7119373338420265
rdog	10150.71	10721.78	3663.0	4281.68	206.197	295.63585	4.25158	3.18733	4129.97	3923.24	7383.96	11378.4	10436.244999999999	3972.34	9381.18	4026.605	0.3806292397313402	0.42922159046090147
CG11899	2961.94	1671.87	779.241	836.382	0.0	3.16892	1.06121	2.13259	1146.76	1153.62	1996.0	3120.83	2316.9049999999997	807.8115	2558.415	1150.19	0.3486597421991839	0.4495713166159517
Mesh1	177.0	95.0	39.1003	42.4809	0.0	0.0	0.0	0.0	51.8997	45.5191	68.0	141.0	136.0	40.7906	104.5	48.7094	0.2999308823529412	0.4661186602870814
eEF1gamma	58437.996297911	29136.164085763	14043.3521	15433.42116	27.142301607557	33.256800596929	59.9748	43.7923	16943.6	15945.6	27578.9	57749.7	43787.080191837	14738.38663	42664.3	16444.6	0.33659213095344964	0.38544169246887905
CG11902	877.968	982.933	972.109	1191.62	1.03622	0.0	1.03168	2.06713	1223.89	1215.38	914.964	1487.0	930.4504999999999	1081.8645	1200.982	1219.6350000000002	1.162731923944369	1.0155314567578866
CG11906	760.97	826.0	734.803	808.324	0.0	3.05495	1.02991	0.0	862.197	815.676	877.0	1498.95	793.485	771.5635	1187.975	838.9365	0.9723731387486846	0.7061903659588796
Ent1	1012.872	777.486	567.031000319536	439.283917	0.0	0.0	0.0	0.0	739.818	704.716	847.99	1433.0	895.179	503.157458659768	1140.495	722.267	0.5620746897098435	0.633292561563181
Pex6	337.9366	275.3939	62.3831	70.4244	1.02724	1.04194	30.06306961	26.60578699	84.61689681	108.57602	232.97247	409.9582	306.66525	66.40375	321.465335	96.59645840499999	0.21653496768870942	0.300487946561952
CG11920	1160.0	673.975	310.721	278.917	1.01965	0.0	0.0	1.02457	472.279	410.083	652.98	1299.0	916.9875	294.81899999999996	975.99	441.18100000000004	0.32150819940293623	0.4520343446141867
Cf2	1233.3557	1380.4675	1083.4194	1205.2310827	158.8464	306.254	36.645376	36.53278	1123.5795	991.7705	1237.1536	1835.74629	1306.9116	1144.32524135	1536.449945	1057.675	0.875594983891795	0.6883888430221525
Mon1	636.537	501.837	429.464	445.509	1.04936	0.0	10.4634	19.1632	380.536	347.491	493.951	785.0	569.187	437.4865	639.4755	364.0135	0.7686164652390163	0.569237601753312
CG11927	590.0	464.0	390.0	479.0	2.0	0.0	1.0	1.0	396.0	421.0	454.9999	805.0	527.0	434.5	629.99995	408.5	0.8244781783681214	0.6484127498740277
pico	4654.58037676	5149.36	2261.003	2339.321743	80.86527	117.30853	3.42311	4.64395	2898.99	2591.68	5170.13	7377.69	4901.97018838	2300.1623715	6273.91	2745.335	0.4692322235970505	0.4375795954994573
Nup205	4674.969	3417.9777	1803.9996	2260.530058729	2.00062761192	3.0017047275	56.0354284995	38.0219235108	1890.997	1996.465	3205.999	5314.99	4046.47335	2032.2648293645	4260.4945	1943.731	0.5022311167240233	0.45622192447379056
cora	1331.3846	738.18364138	525.2928	649.7932359	3.29507	1.12082	66.614700155931	36.81602115048	694.707700879837	752.206901242162	674.70480234372	1515.874431839	1034.78412069	587.54301795	1095.28961709136	723.4573010609995	0.5677928431663823	0.660516898701373
SP1029	1568.92583	1394.94420021404	36.791340184249	16.893700272795	3.03923	6.21253	1.03392228	2.0554329	405.03300108463	236.1068599307	1506.96200005095	2329.78900006907	1481.9350151070198	26.842520228522	1918.37550006001	320.569930507665	0.0181131560796433	0.16710489187212674
CG11961	188.7657	123.91478	142.28817	165.587	4.01043	4.0213	15.234332325	11.085396322	606.7119	649.4123	614.9891	1057.9792	156.34024	153.937585	836.48415	628.0621	0.98463188364045	0.7508356255166341
ScsbetaA	4772.70059221155	2897.3288891	2541.03265952	2555.82918561832	997.73280438594	1629.84126736041	3.295559	7.66827	1436.9667	1272.1785	2003.271	3150.164	3835.0147406557753	2548.43092256916	2576.7175	1354.5726	0.6645165911757059	0.5256969768707668
CG11964	1607.0	1035.0	615.298	648.832	1.00659	0.0	0.0	0.0	798.702	760.168	1057.99	1832.0	1321.0	632.065	1444.995	779.435	0.4784746404239213	0.5394032505302786
CAHbeta	292.0	285.00028	109.736	140.825	0.0	1.32492	0.0	0.0	205.264	162.175	232.0	389.675	288.50014	125.28049999999999	310.8375	183.7195	0.4342476228954343	0.5910467688100697
RagA-B	878.923	616.0	461.201	433.559	0.0	1.07247	1.07678	0.0	739.799	638.441	932.0	1439.93	747.4615	447.38	1185.9650000000001	689.12	0.5985324996672069	0.5810626789154822
CG11970	1448.8936	1525.89	911.466	1089.04	1.09429	5.46181	1.10783	1.1128	1351.53	1399.96	1534.91	2528.54	1487.3918	1000.2529999999999	2031.725	1375.745	0.672487908027999	0.6771315015565591
E(var)3-9	2404.0	2242.95	1630.81	1786.41	1.06728	0.0	0.0	1.04673	959.191	831.592	967.933	1600.0	2323.475	1708.6100000000001	1283.9665	895.3915	0.7353683598919722	0.6973635994397049
CG11975	639.0	552.0	393.962	374.169	39.1472	65.4136	0.0	0.0	439.038	368.831	597.853	851.586	595.5	384.0655	724.7194999999999	403.9345	0.6449462636439967	0.5573666777284177
Polr2E	1314.287	687.9906	308.9978	287.7398	1.07641	2.12794	123.718	52.0091	306.002	254.261	695.924	1278.87	1001.1388	298.36879999999996	987.3969999999999	280.1315	0.2980294041145943	0.28370706007816515
CG11980	3337.00500006822	1782.99300095459	894.84909886533	918.97922642066	1.009651168076	2.0083308742332	0.0	1.0064600951848	1255.14730560413	1109.017119645	1316.98970051145	2273.9900355215	2559.999000511405	906.914162642995	1795.4898680164752	1182.082212624565	0.3542634830958227	0.6583619510648882
Prosbeta3	4204.97	2349.0	1671.93	1897.09	7.11754	9.13698	3.0265	0.0	2326.07	2190.91	2451.88	4299.86	3276.985	1784.51	3375.87	2258.49	0.5445584889769102	0.6690097663713354
Iru	1789.81	1289.7	766.691	859.804	4.04096	7.0839	12.1942	17.3012	962.309	892.196	1092.96	1955.92	1539.755	813.2475	1524.44	927.2525	0.5281668187471382	0.6082577864658497
CG11983	30.0	31.0	5.17718	8.22007	3.0	5.0	0.0	0.0	27.8228	30.7799	9.0	21.0	30.5	6.698625	15.0	29.30135	0.21962704918032785	1.9534233333333333
Kcmf1	5037.5013	3746.463	2562.04040086938	2497.21168274	9.81727	11.20922	1.4942	1.53896	3406.9665	2787.782	3582.185	6276.788	4391.98215	2529.62604180469	4929.4865	3097.37425	0.5759645543652062	0.6283360853103056
Sf3b5	650.0	404.0	210.0	214.0	1.0	1.00189	0.0	0.0	261.0	242.0	316.0	617.998	527.0	212.0	466.999	251.5	0.40227703984819735	0.5385450504176669
CG11986	474.0	332.0	214.045	249.728	1.01339	0.0	0.0	0.0	200.955	156.272	231.987	402.0	403.0	231.8865	316.9935	178.6135	0.5754007444168735	0.5634610804322486
tgo	1529.978	1566.976	1211.88	1411.162	0.0	0.0	1.01814	2.02862	1453.12	1472.84	1568.0	2536.0	1548.477	1311.5210000000002	2052.0	1462.98	0.8469748016922435	0.712953216374269
neur	731.167705524939	931.69551216	892.948	933.7968285	1.07899	4.20663	1.09046	1.09258	1458.051	1135.203	1179.921	1760.613	831.4316088424696	913.37241425	1470.267	1296.627	1.0985538732663886	0.8818990020180008
hyx	1968.00481	1499.95	1072.97	1150.97	0.0	2.06173	0.0	2.05344	1159.03	1086.03	1424.0	2296.94	1733.977405	1111.97	1860.47	1122.53	0.6412828660820987	0.6033582911844856
Rel	1958.002	1527.9184496	774.939	856.8152	6.19362	3.06939	0.0	3.0807	1018.06	1012.18	1299.81	2312.93	1742.9602248	815.8770999999999	1806.37	1015.1199999999999	0.46809851905462707	0.5619668174294302
Mst85C	667.9999	582.0	435.889	456.834	0.0	2.02257	0.0	1.0	496.111	491.166	529.0	994.977	624.99995	446.3615	761.9884999999999	493.6385	0.7141784571342765	0.6478293307576165
Ada	182.0	99.0	53.0	55.0	0.0	0.0	0.0	0.0	67.4278	42.324	243.541	497.976	140.5	54.0	370.7585	54.8759	0.38434163701067614	0.14800982310587618
CG11999	846.0	616.991	373.396	398.264	1.0051	0.0	0.0	1.00865	645.604	618.736	667.995	1087.0	731.4955	385.83000000000004	877.4975	632.1700000000001	0.5274536890520858	0.7204237049108403
Prosbeta7	5305.0043	3131.0	1896.43	2044.38476	5.20737	7.31033	0.0	0.0	2056.57	1783.62	2344.79	3955.69	4218.00215	1970.40738	3150.24	1920.095	0.4671423365680361	0.6095075295850475
spartin	212.0	265.341	233.999683	231.0000071	0.0	1.00329	0.0	0.0	236.0	207.0	381.0	657.752	238.6705	232.49984505	519.376	221.5	0.9741457157461857	0.4264733064292536
Pxn	363.98561	151.8706	509.178545	560.35088	0.0	1.07022	31.0143	16.1297	988.784	989.65	299.0	438.93	257.928105	534.7647125	368.96500000000003	989.217	2.0733091979255223	2.6810591790549236
Tmep	1761.4961	1633.79869651	1222.1827	1204.9536	3.27302	6.52755	36.5089	38.2039	1338.8241	1294.0390804	1360.7299	2230.4732	1697.647398255	1213.56815	1795.6015499999999	1316.4315902	0.714852890681197	0.7331423779401395
Mms19	1093.36	1054.86	785.977	812.929	3.13291	2.09801	32.5929	37.0675	1023.97	1029.99	1124.87	1697.85	1074.11	799.453	1411.36	1026.98	0.74429341501336	0.727652760457998
PIG-B	1436.052	1507.337	993.11	1213.03	1.15354	2.32681	4.9445	14.6658	1489.888	1436.968	1386.846	2578.669	1471.6945	1103.07	1982.7575	1463.4279999999999	0.7495237632538546	0.7380771476088225
RabGGTa	541.985	541.0	312.591	339.133	1.01563	0.0	2.01458	0.0	443.409	393.867	394.984	654.0	541.4925000000001	325.86199999999997	524.492	418.63800000000003	0.6017848816003913	0.798178046566964
kst	3646.0561385245	2280.1782	1292.1303	2134.98329172466	21.1404000578856	46.713300021547	158.94694545297	112.8219023023	2246.8673601262	2885.01535153467	3048.85918354	5812.2926986	2963.11716926225	1713.55679586233	4430.57594107	2565.941355830435	0.5782953214398091	0.5791439735960717
CG12010	340.0	384.0	228.783	238.62	0.0	0.0	0.0	0.0	203.217	187.38	248.0	404.0	362.0	233.7015	326.0	195.2985	0.6455842541436464	0.5990751533742331
CG12012	521.9999	344.0003	211.3773	199.2153	2.04603	2.02531	0.0	0.0	262.622	232.785	237.954	484.975	433.0001	205.2963	361.46450000000004	247.70350000000002	0.4741252946592853	0.6852775307118679
Gtpx	1747.631	984.409	660.8429	716.9762	15.72379	12.3935	1036.36588	604.59	1665.16	1660.026	1641.273	2843.609	1366.02	688.90955	2242.441	1662.593	0.5043187874262456	0.7414210674885092
RabX6	267.524	194.8894	140.749	132.0834	1.102716	0.0	0.0	1.10979	168.815	121.539	218.787	298.044	231.2067	136.4162	258.4155	145.177	0.5900183688448475	0.5617967962448073
PolD2	908.988	756.97	475.081	536.223	1.00183	0.0	14.0116	10.0299	531.919	448.777	719.998	998.0	832.979	505.652	858.999	490.34799999999996	0.6070405136263939	0.570836520182212
Cdc37	2454.34	1511.9	1045.11	1240.14	1.02982	3.95428	6.10172	6.07359	1132.08	872.736	1115.97	1925.88	1983.1200000000001	1142.625	1520.9250000000002	1002.4079999999999	0.5761754205494373	0.65907786379999
Patj	1364.9914	1357.6155	829.6074	942.001	0.0	1.08497915578	41.2112	43.6654	1125.14	1108.4	1190.99	1909.87	1361.30345	885.8042	1550.4299999999998	1116.77	0.6507029714792834	0.7202969498784209
CG12024	840.996	729.753	515.167	558.728	0.0	0.0	128.003	128.246896	860.833	789.272	755.001	1251.999	785.3745	536.9475	1003.5	825.0525	0.6836833892620654	0.8221748878923767
CG12025	1495.1965	1132.1986	675.0997	761.11589	2.43753	0.0	79.8054	54.8008	952.901	923.884	1208.56	2220.0	1313.6975499999999	718.107795	1714.28	938.3924999999999	0.5466309920422704	0.5473974496581655
Tmhs	711.29436	347.9133	91.67348	88.7587	2.01968	3.04478	23.7052	6.08633	79.3265	105.241	198.98	329.955	529.60383	90.21609000000001	264.4675	92.28375	0.17034637004041306	0.34894174142380446
dib	23.5941	12.5903	0.0	0.0	0.0	0.0	0.0	0.0	4.92771	0.0	16.5554	46.1924	18.0922	0.0	31.3739	2.463855	0.0	0.07853199634090757
Gale	1244.994	646.846	341.2869	364.571	3.34472	0.0	64.0055	31.1535	357.713	356.429	682.655	1190.0	945.92	352.92895	936.3275	357.071	0.3731065523511502	0.3813526784164729
MED14	1594.36	1718.56	1403.11	1744.346	3.197512	4.244576	13.8554	13.9498	1722.2	1825.61	1822.58	3201.27	1656.46	1573.728	2511.925	1773.905	0.9500549364307016	0.7061934572091124
nSMase	1656.16	1275.51	775.974	793.579	2.01758	3.03941	81.839	66.4905	1015.03	860.421	925.982	1555.96	1465.835	784.7764999999999	1240.971	937.7255	0.5353784702916767	0.7556385282170172
DCTN4-p62	1191.97	1045.0	768.494	758.173	1.01669	0.0	1.02639	0.0	892.506	849.827	737.983	1270.84	1118.4850000000001	763.3335	1004.4114999999999	871.1665	0.6824709316620249	0.8673402285816123
mud	6373.36294	5812.69503629	3936.36936953023	5111.973427006	9.172663892	11.9850421408	3.05644	1.00929	4581.4698	5360.003	5700.8525	10231.7851	6093.028988145	4524.171398268115	7966.318799999999	4970.7364	0.7425159813075962	0.6239690533097922
l(2)05287	3793.64	3198.88	1327.16	1451.97	3.23524	2.14615	4.35945	2.12127	2272.8461	2333.3321	3200.489	5587.692	3496.26	1389.565	4394.0905	2303.0891	0.39744326794917995	0.5241332876507664
Act42A	8547.53	5000.75	877.282	1076.2	39.3383	18.8686	5.47074	3.24727	2556.72	2779.8	4918.66	8459.13	6774.14	976.741	6688.8949999999995	2668.26	0.1441867159521356	0.39890893787389403
CG12054	3766.682	3456.629	1470.2553	1452.8066	75.75696	190.5152	95.6269	118.1947	2158.353	1803.069	3800.33	5956.25	3611.6555	1461.5309499999998	4878.29	1980.711	0.4046706420365951	0.40602567703027087
Gapdh1	12435.70667	7119.2467	4008.9133	4178.32667	9.6387	11.87417	1310.28	669.75	8370.09	8860.68	10165.4	16525.1	9777.476685	4093.6199850000003	13345.25	8615.385	0.4186785728960294	0.645576890653978
CG12056	242.0	142.0	125.0	129.493	0.0	1.00354	0.0	0.0	170.0	139.507	216.0	295.996	192.0	127.2465	255.998	154.7535	0.6627421875	0.6045105821139228
CG12065	959.700270081177	835.832277259	535.318733	471.2618	2.08888	0.0	4.30047	2.1673200211056	569.6823	492.738600827905	569.9106	934.9994	897.7662736700885	503.2902665	752.455	531.2104504139525	0.5606027774272898	0.7059697263144672
Pka-C2	72.0	48.0	7.30066	4.65191	3.09678	3.8694	0.0	0.0	3.69934	2.34809	2.90322	14.13059	60.0	5.976285	8.516905	3.023715	0.09960474999999999	0.3550250942096924
sro	245.759	85.3591	8.24545	7.37873	0.0	0.0	4.0	1.0	7.34405	2.11778	53.2195	140.234	165.55904999999998	7.8120899999999995	96.72675000000001	4.730915	0.04718612482978128	0.04891009984311475
Sap-r	20857.527	13784.965	7374.253	8995.755	41.1315	38.0965	8.4334	1.05304	5219.74	5813.24	8997.87	17025.9	17321.246	8185.003999999999	13011.885000000002	5516.49	0.47254129408473267	0.423957789359497
CG12071	56.0	33.4742	7.78286	7.79664	0.0	0.0	0.0	1.52586	1.21714	1.20336	6.0	19.99999	44.7371	7.78975	12.999995	1.21025	0.17412281976256844	0.09309618965238063
wts	2642.0	2547.0	1731.74	2223.86	4.40488	5.50393	0.0	0.0	2273.26	2332.14	2317.6	4041.5	2594.5	1977.8000000000002	3179.55	2302.7	0.7623048756985933	0.724221981097954
CG12075	445.942400048433	207.91001	140.54660726343	173.063	0.0	0.0	9.05714	8.08982	100.453	126.937	158.0	218.0	326.92620502421653	156.804803631715	188.0	113.695	0.4796336335904916	0.6047606382978723
Ythdc1	2219.004	1581.0	1305.448	1358.699	1.23325	3.67067	0.0	0.0	1240.552	1107.3023064636	1402.764	2361.32881323	1900.002	1332.0735	1882.0464066149998	1173.9271532317998	0.7010905777993918	0.623750375711083
PIG-C	234.0	209.0	179.5574	139.0	0.0	0.0	0.0	0.0	166.443	133.0	178.9999	260.00008	221.5	159.27870000000001	219.49999000000003	149.7215	0.7190911963882619	0.6821025367700471
ND-30	2744.99	1340.99	605.047	646.075	3.01254	1.00299	3.01411	1.00818	898.953	761.925	1452.99	2714.0	2042.9899999999998	625.561	2083.495	830.439	0.3061987577031704	0.3985797902082798
CG12081	1008.0	816.0	572.399	655.208	1.03713	1.02424	0.0	0.0	728.601	675.792	956.963	1579.98	912.0	613.8035	1268.4715	702.1965	0.6730301535087719	0.5535768836745641
Usp5	3622.961	2867.9632	1916.691	2089.942	0.0	3.055896545	1.03354	1.03552	2769.306	2538.058	3221.0	4785.94	3245.4620999999997	2003.3165	4003.47	2653.682	0.6172669525242646	0.6628454815447599
CG12084	1407.534	1625.162	1034.719	1186.429	12.5053	20.2103	20.6867	25.8416	1134.281	1159.111	1518.73	2391.949	1516.348	1110.574	1955.3395	1146.696	0.7324004779905405	0.5864434283662759
hfp	3032.6968	1889.3423	1238.0124	1383.90561	3.1792	5.49750431569	71.298921	59.655187	1583.988658697	1396.1008740341	2269.8212456	4129.5037	2461.01955	1310.9590050000002	3199.6624728	1490.04476636555	0.5326893908664806	0.46568810899032836
cue	3987.3	3596.34	2100.3	2232.65	1.04959	5.25845	292.703	259.662	4706.7	4389.35	5639.95	8751.74	3791.82	2166.4750000000004	7195.844999999999	4548.025	0.5713549166363383	0.6320348756817302
Iml1	1057.2790903709	792.69135511	408.38204168997	470.097	9.01462	26.38833792	55.720800907533	32.30878887287	564.617400023773	536.903	837.9861	1495.611	924.9852227404499	439.239520844985	1166.79855	550.7602000118866	0.4748611221524728	0.4720268121792632
CG12091	3827.32	2352.497	1188.434	1571.674	1.52261	9.0469	4.68349	1.50485	1506.57	1492.33	1852.48	3787.95	3089.9085	1380.054	2820.215	1499.4499999999998	0.44663264300544825	0.5316793223211704
CG12093	1034.0	700.0	320.0	376.0	1.0	4.0	0.0	0.0	422.0	371.0	552.0	861.0	867.0	348.0	706.5	396.5	0.4013840830449827	0.5612172682236376
CG12096	1105.36881	878.38993	586.3177	642.713	7.01245	7.00793	0.0	3.0	1305.68	1201.29	1159.99	1824.99	991.87937	614.5153499999999	1492.49	1253.4850000000001	0.6195464575495707	0.8398615736118836
CG12099	2585.45	1563.71	1057.09	1233.29	296.739	509.314	1.08339	1.08078	1221.37	1281.62	1306.26	2497.69	2074.58	1145.19	1901.975	1251.495	0.5520105274320586	0.657997607749839
Pdk1	3693.949941	4270.9715	2826.7868	2981.782	6.11669	14.30126	2.04673	2.02882	4308.21114	3911.2158956	5098.881708	7335.694	3982.4607204999998	2904.2844	6217.287854	4109.7135178	0.7292688123827535	0.6610138720142971
Hsp60A	18928.0164	12667.2458	4077.53	3751.7900000457	14.8128	24.0714	355.368	217.419	4582.28	3626.77	12074.3	20014.0	15797.6311	3914.66000002285	16044.15	4104.525	0.24780044395535036	0.25582689017492355
CG12104	867.0034	685.616	436.6927	471.503	0.0	2.15394	4.17952	2.80854	592.943	557.6024	524.762	949.219	776.3097	454.09785	736.9905	575.2727	0.5849441917317276	0.7805700344848407
CG12106	313.229	266.432	145.075	147.046	1.22916	0.0	0.0	0.0	43.0	26.5007	66.0	97.0	289.83050000000003	146.0605	81.5	34.75035	0.5039514474839604	0.4263846625766871
CG12107	1781.72	966.986	561.058	585.689	1.07272	3.23883	130.28	70.0139	581.942	616.311	734.927	1321.76	1374.353	573.3734999999999	1028.3435	599.1265000000001	0.4171952184045874	0.5826132026895683
Ppt1	407.983	277.5958	148.031	149.06192	0.0	1.0	0.0	0.0	106.0	93.0	138.0	256.0	342.7894	148.54646	197.0	99.5	0.43334613030624636	0.5050761421319797
Caf1-180	4112.92	4058.94	3611.96	4214.65	3.0035	9.00427	46.0759	33.0554	3781.04	3958.35	3504.0	6459.0	4085.9300000000003	3913.305	4981.5	3869.6949999999997	0.9577513564843254	0.7768132088728295
Pld	1269.85610000998	1354.9307	698.41333	708.65558	17.7828	30.7886	2.14345	1.06914	676.5865	760.3445	890.2169	1465.21187	1312.3934000049899	703.534455	1177.714385	718.4655	0.5360697905043755	0.6100507127625855
CG12112	370.0	262.0	279.99969	271.0	1.00229	0.0	1.0	1.0	223.0	189.0	515.998	822.0	316.0	275.499845	668.999	206.0	0.8718349525316456	0.30792273232097506
IntS4	1139.0	1145.0	721.333	734.557	0.0	0.0	0.0	0.0	985.667	968.443	1312.0	2198.0	1142.0	727.9449999999999	1755.0	977.0550000000001	0.6374299474605953	0.5567264957264958
spn-F	1214.0	921.0	765.826	687.994	4.18546	2.09506	0.0	0.0	718.174	656.006	715.815	1358.9	1067.5	726.9100000000001	1037.3575	687.0899999999999	0.6809461358313819	0.6623463945650365
CG12116	42.5806	20.7948	4.0	9.0	0.0	2.12557	5.41939	4.20523	18.0	20.0	27.0	77.8744	31.6877	6.5	52.4372	19.0	0.2051269104415909	0.36233818739368234
Sptr	903.0	547.0	411.966	401.602	3.00503	7.00754	0.0	0.0	528.034	463.398	504.995	783.992	725.0	406.784	644.4935	495.716	0.5610813793103449	0.7691559340784663
CG12118	564.771	463.568	353.9246	295.4536	3.770840219614	3.0000000538249	0.0	0.0	291.9997	328.0	352.0001	625.0	514.1695	324.6891	488.50005	309.99985000000004	0.6314826141962914	0.6345953291099972
SmydA-9	37.0	10.0	78.0	52.4173	0.0	0.0	0.0	2.0	91.0	72.5827	18.0	35.0	23.5	65.20865	26.5	81.79135	2.774836170212766	3.086466037735849
p130CAS	517.95	288.9996	33.13818	25.99925	1.02448	1.05793	1.0504	0.0	27.8618	34.00078	104.97551	270.942	403.4748	29.568714999999997	187.958755	30.931289999999997	0.07328515932097865	0.16456424176676418
t	7.0	4.0	24.1227	35.4106	1.0	1.0	0.0	0.0	15.8773	13.5894	11.0	39.0	5.5	29.76665	25.0	14.73335	5.412118181818181	0.589334
CG12123	346.976	281.0	210.002	196.449	0.0	0.0	1.02445	0.0	201.998	202.551	282.0	463.0	313.988	203.2255	372.5	202.2745	0.6472397034281565	0.5430187919463086
mxc	1542.6	2055.15	1762.551	2242.14	2.03737	2.04874	13.4	33.9132	2481.45	2677.86	2351.96	4110.95	1798.875	2002.3455	3231.455	2579.6549999999997	1.1131098603293725	0.7982951951984477
Miga	2980.7528	2293.4929	1499.3202	1676.9021	191.7864	342.9245	0.0	0.0	1186.15	1061.65	1649.21	2742.08	2637.12285	1588.1111500000002	2195.645	1123.9	0.602213563922515	0.5118769199938971
amx	376.00014	296.0003	218.7113	252.628	0.0	1.013	0.0	0.0	261.289	233.372	339.0	540.987	336.00022	235.66965	439.9935	247.3305	0.701397308608905	0.5621230768181803
CG12128	2448.759	1484.608	754.014	788.194	15.9406	16.9126	26.2608	12.5838	993.681	908.619	1477.4	2835.28	1966.6835	771.104	2156.34	951.1500000000001	0.3920834236927294	0.4410946325718579
CG12129	1377.7	928.744	673.902	694.578	0.0	0.0	0.0	1.11762	492.093	422.697	428.0	860.0	1153.222	684.24	644.0	457.395	0.593328951407448	0.7102406832298136
Pal1	1669.6921	1627.856	1258.7043	1394.6524	223.252	435.85044	20.3113	19.14922	1388.292	1337.351	1515.753	2410.146	1648.77405	1326.6783500000001	1962.9495000000002	1362.8215	0.8046453363333806	0.6942723182639186
eIF3j	4146.87	2091.0	1247.92	1229.29	7.33985	6.31581	3.12975	0.0	1315.08	1125.71	1892.66	3696.68	3118.935	1238.605	2794.67	1220.395	0.3971243389169701	0.4366866213184383
c11.1	2237.25	2338.239	1223.854	1427.355	5.45939	5.2678	2.03792	3.04604	1281.19	1349.92	2194.89	3502.89	2287.7445	1325.6045	2848.89	1315.555	0.5794373016742036	0.46177809603038383
CG12134	1398.149	741.0	266.0	270.5126	0.0	0.0	7.00512	6.0	268.0	247.487	580.0	1015.0	1069.5745	268.2563	797.5	257.7435	0.25080655905689603	0.32318934169278996
c12.1	748.649	501.746	324.01	302.448	1.01923	3.07665	213.351	156.254	709.99	568.552	874.981	1240.92	625.1975	313.229	1057.9505	639.271	0.501008081446263	0.604254168791451
Etf-QO	1939.996	1639.966	1126.422	1254.862	2.03254	2.04709	0.0	2.03744	1306.58	1177.14	1348.97	2146.95	1789.981	1190.642	1747.96	1241.8600000000001	0.665170188957313	0.7104624819789928
LysRS	7036.9593	3996.8473	2324.225	2593.972	5.28555	8.40892	1.04349	3.14852	2211.771	2245.026	3571.714	6733.595	5516.9033	2459.0985	5152.654500000001	2228.3985000000002	0.44573891661287596	0.4324758238690368
Tsp42Eg	180.933	60.0	98.2107	82.7657	0.0	1.06589	2.06748	0.0	88.7893	97.2343	52.0	128.934	120.4665	90.4882	90.467	93.0118	0.7511482445327125	1.0281295942166757
Tsp42Ej	53.2415	38.4925	51.8018	46.0563	0.0	0.0	2.03688	1.0	54.0	44.4916	36.0	59.0	45.867000000000004	48.929050000000004	47.5	49.2458	1.066759325876992	1.0367536842105263
c12.2	747.949	527.154	271.8209	328.7379	0.0	5.33584	18.0514	11.8455	302.179	252.263	610.0	997.664	637.5515	300.2794	803.832	277.221	0.47098846132430083	0.34487430209297465
Pdp	1250.449	910.94	598.148	614.417	4.24306	8.39017	314.55	284.06	1159.85	1147.5858	1384.755	2352.61	1080.6945	606.2825	1868.6825000000001	1153.7179	0.5610119233511414	0.6173964276970539
Hira	1439.94	1549.97	1255.28	1401.17	3.05808	2.02972	2.06436	1.02849	1320.72	1345.83	1419.94	2116.97	1494.955	1328.225	1768.455	1333.275	0.8884715593445957	0.753920795270448
CG12155	716.0	913.0	648.256	644.306	1.04828	0.0	0.0	0.0	843.744	798.694	918.952	1435.0	814.5	646.281	1176.976	821.219	0.7934696132596685	0.6977364024415111
Rab39	601.4061	472.6287	268.6788	252.4205	0.0	1.03687	12.5936	8.37093	546.321	506.58	782.0	1264.96	537.0174	260.54965000000004	1023.48	526.4505	0.48517915806824896	0.5143730214562082
Tom40	7118.86	4824.94	2395.01	2598.03	5.04567	6.04445	5.14087	2.06125	3073.99	2667.97	4321.95	7469.96	5971.9	2496.5200000000004	5895.955	2870.9799999999996	0.41804450844789776	0.486940622850751
CG12159	769.75	473.784	327.715	327.085	3.76407	3.19172	1.2498	1.21591	415.285	358.915	368.236	726.808	621.767	327.4	547.5219999999999	387.1	0.5265638092726053	0.7070035541950827
mri	1584.8965	1197.8301	680.4132	718.0356	3.31918	2.18213	1.10397	2.1699658273	1008.59	879.964	1069.68	1745.8164	1391.3633	699.2244000000001	1407.7482	944.277	0.5025462436733814	0.6707712359355175
POLDIP2	832.855	733.841	387.545	469.102	9.01273	13.04132	0.0	0.0	507.568	450.491	701.987	1343.96	783.348	428.32349999999997	1022.9735000000001	479.0295	0.5467857197567365	0.4682716609961059
CtsF	6235.99	3761.9727	2353.0717	2623.5762	24.1173	36.10968	2.00792	5.02668	2728.9275	2693.4228	2811.8856	5143.894	4998.98135	2488.32395	3977.8898	2711.17515	0.4977661999079072	0.6815611508393219
Incenp	3928.793	3079.8906	2440.9891	2526.3467	45.6119	86.8064	2.21067	1.10562	2324.01	2282.65	2882.39	5144.19	3504.3418	2483.6679	4013.29	2303.33	0.7087401976599428	0.5739256320873897
CG12170	848.0	488.0	201.0	187.559	1.00333	6.01251	0.0	0.0	173.0	151.441	307.997	485.987	668.0	194.27949999999998	396.992	162.22050000000002	0.2908375748502994	0.4086241032564888
CG12171	938.0	625.0	379.0	408.0	0.0	2.0	2.0	2.0	794.0	767.0	1267.0	2183.0	781.5	393.5	1725.0	780.5	0.5035188739603327	0.452463768115942
Enoph	1375.0	656.0	380.662	353.005	1.00781	2.01666	0.0	0.0	196.338	176.995	389.992	731.983	1015.5	366.83349999999996	560.9875	186.66649999999998	0.3612343673067454	0.33274627331268525
tth	3268.8297	2969.5297	2003.66	2120.35	4.23362	5.29804	24.1656	24.4674	2335.34	2195.65	2790.77	4846.7	3119.1796999999997	2062.005	3818.7349999999997	2265.495	0.6610728455305093	0.5932579767907435
DNAlig4	471.0	646.0	396.559	446.61	0.0	3.06498	0.0	0.0	271.351	228.39	319.0	496.935	558.5	421.58450000000005	407.9675	249.8705	0.7548513876454791	0.6124764840336546
CG12177	793.9994	410.8266	139.2812	189.0005	61.0	80.0	71.0	36.1732	320.719	300.0	494.0	745.0	602.413	164.14085	619.5	310.3595	0.2724722906046184	0.5009838579499597
Nhe1	739.109	768.007	586.697	585.089	1.02889	0.0	2.05117	1.01491	606.22	596.114	622.971	1037.0	753.558	585.893	829.9855	601.167	0.7775021962476678	0.7243102439741418
Hpf1	1663.0	1164.0	835.405	960.311	1.01643	1.00903	0.0	1.00424	1108.59	1033.69	1255.98	2040.99	1413.5	897.858	1648.4850000000001	1071.1399999999999	0.6352019808984789	0.6497723667488632
CG12182	175.4243	151.13502	66.0883	86.39337	5.07599	0.0	14.3127	12.2271	85.1111	99.943	111.924	189.0	163.27965999999998	76.240835	150.462	92.52705	0.4669340626995427	0.6149529449296168
ProRS-m	315.8652	197.0003	85.2896	81.2695	0.0	0.0	1.13513	0.0	176.71	197.731	253.0	475.0	256.43275	83.27955	364.0	187.22050000000002	0.3247617552750185	0.514342032967033
Rev1	626.0	772.0	541.765	637.666	1.04027	2.0697	0.0	0.0	736.235	692.334	736.96	1191.93	699.0	589.7155	964.445	714.2845	0.8436559370529327	0.740617142501646
RYBP	1606.6787	1211.7193	929.5587	842.527	39.9932	155.173	121.322	84.2804	1223.44	1183.47	1109.01	1911.83	1409.199	886.04285	1510.42	1203.455	0.6287563715273712	0.7967684485110101
CG12194	151.000042151741	100.999960010267	16.65549	25.5445	2.0	1.0	0.0	0.0	8.34455	4.45554	4.0	11.0	126.000001081004	21.099995	7.5	6.400045	0.1674602763410696	0.8533393333333333
egg	1722.99	1793.0	1201.05	1383.7	0.0	0.0	1.00568	0.0	1507.95	1566.3	1744.0	2716.0	1757.995	1292.375	2230.0	1537.125	0.7351414537584009	0.6892937219730941
kek5	1099.8489	1072.6759	680.27703	865.1749269175	62.1082	111.64173	8.15036	12.3243	883.723000424846	860.824921456999	1233.89227367	2056.36100056041	1086.2624	772.72597845875	1645.126637115205	872.2739609409225	0.7113621703731529	0.5302169093015778
Kaz1-ORFB	14.14422	13.1737	3.094050746892	6.50051	3.31928	0.0	0.0	0.0	18.906	23.4995	24.6807	103.0	13.65896	4.797280373446	63.84035	21.20275	0.35121856813739843	0.33212145610103955
narya	32.0	35.0	34.0	19.0	0.0	0.0	5.0	5.0	160.0	80.0	1.0	6.0	33.5	26.5	3.5	120.0	0.7910447761194029	34.285714285714285
Naa15-16	9574.32	6863.06	3072.66	3057.8007	4.67049	12.9172	277.683	228.944	3552.34	3346.96	5716.33	10117.1	8218.69	3065.23035	7916.715	3449.65	0.37295850676932696	0.43574260283463534
ND-18	1675.95	800.95	418.118	448.093	3.08487	1.03034	1.0502	1.04998	541.882	511.907	948.915	1777.97	1238.45	433.1055	1363.4425	526.8945	0.34971577374944485	0.3864442394893807
CG12204	344.0	204.0	132.0	156.0	0.0	1.0	1.0	0.0	201.0	234.0	258.0	521.0	274.0	144.0	389.5	217.5	0.5255474452554745	0.558408215661104
CG12206	63.0	49.9999783018	9.0	8.0	2.0	0.0	0.0	0.0	11.0	10.0	97.0	107.0	56.4999891509	8.5	102.0	10.5	0.15044250676399645	0.10294117647058823
red	2808.23410618	2222.53462833127	1235.79030009202	1398.08608334	18.1425	34.3932	3.7607	6.46055	973.21	955.914	1326.857	2421.603	2515.384367255635	1316.93819171601	1874.23	964.562	0.5235534611964022	0.5146444139726715
Syb	1454.3757	880.8365	545.3266	509.3009	5.57621	2.54798	333.923	220.3493	684.1674	632.2663	724.5488	1184.4045	1167.6061	527.31375	954.4766500000001	658.21685	0.45161955731474857	0.689610217285043
peb	1103.445	839.001	201.5783	247.0682	1.07086	4.24714	42.5552	20.9988	268.421	306.931	747.929	1426.75	971.223	224.32325	1087.3395	287.676	0.2309698699474786	0.2645687018635854
CG12213	1017.8293	905.1046	755.135	864.222	4.092889	5.01594	1.01378	0.0	778.123	803.238	794.9793	1315.9837	961.46695	809.6785	1055.4814999999999	790.6805	0.8421282707637532	0.7491182934044796
mlt	1335.841	1243.08035	336.687	293.319	7.10584	9.30017	354.159	327.919	880.313	875.681	1111.89	1984.7	1289.4606749999998	315.00300000000004	1548.295	877.9970000000001	0.24429050540839495	0.5670734582234006
PpV	2389.0013	1580.965419	1012.82016823	1059.8416	1.0196437259947	3.0585740229338	0.0	1.03444	1230.18	1150.16	1668.98	2543.94	1984.9833595	1036.3308841150001	2106.46	1190.17	0.5220854266385603	0.5650095420753302
mei-P26	6221.78528744	6675.6481	3851.5568	4233.8823	9.69634	19.07856	22.217	10.357037	3931.445776	3921.134327	5876.299173	10032.917	6448.71669372	4042.71955	7954.6080865	3926.2900515	0.6269029548060238	0.49358686296103294
CG12219	995.993	849.995	689.059	734.215	1.0013	1.00304	1.00711	2.00473	645.941	655.785	765.999	1314.0	922.994	711.637	1039.9995	650.863	0.7710093456728861	0.6258301085721677
mRpL32	625.985	374.0	177.758	174.705	1.05023	0.0	0.0	0.0	187.537	182.387	297.139	487.563	499.9925	176.2315	392.351	184.962	0.3524682870243054	0.4714197236657992
Dsp1	1313.80300001105	1519.843	667.9307	693.2092	28.3666	39.5008	184.197	285.162000031988	781.07013	675.79136	2048.6328	3071.7443	1416.823000005525	680.5699500000001	2560.18855	728.430745	0.48034930968606954	0.284522304031084
Spt6	4391.76	4180.66	2119.722	2435.63	2.1674100249854	8.5798900271735	3.24522	4.33405	2710.28	2857.37	3570.83	6169.42	4286.21	2277.6760000000004	4870.125	2783.825	0.5313962684982771	0.5716126382793049
car	874.903	863.0	473.747	464.8214	8.32164	11.5884	1.09712	0.0	404.253	342.179	644.678	998.412	868.9515	469.2842	821.5450000000001	373.216	0.5400579894274882	0.4542855230084779
Galphaf	199.688	222.704	98.5182	93.8578	1.0595	0.0	1.07355	2.05298	99.4818	33.8305	288.94	518.0	211.196	96.18799999999999	403.47	66.65615	0.45544423189833133	0.165207202518155
Idh3a	8102.001	4537.394	2887.47	3041.0	1441.38	2828.98	0.0	2.60493	1506.53	1490.003	2516.617	4877.012	6319.6975	2964.2349999999997	3696.8145	1498.2665	0.46904697574527887	0.4052858210764971
Ranbp21	2953.403	2903.658	1533.077	1873.367	4.1634	2.09123	81.5918	56.3414	1540.77	1600.04	2288.17	3225.22	2928.5305	1703.222	2756.6949999999997	1570.405	0.5815961281605229	0.5696694773995673
Arp10	455.0	320.0001	215.0	177.25	0.0	1.00151	7.0	3.0	640.0	538.75	808.0	1346.0	387.50005	196.125	1077.0	589.375	0.5061289669511011	0.5472376973073352
CG12236	1375.483	1485.228	1283.426	1448.439	0.0	2.12372	222.056	190.769	2028.57	2055.557	2000.996	3419.211	1430.3555000000001	1365.9325	2710.1035	2042.0634999999997	0.9549601480191461	0.7535001891994161
CG12237	2547.0	1564.0	951.885	1013.49	0.0	0.0	1.00111	0.0	1272.11	1083.51	2093.0	3440.0	2055.5	982.6875	2766.5	1177.81	0.47807711019216736	0.4257401048255919
e(y)3	7540.7929	6784.7454	4270.5579	5225.5797	21.57087	24.78523	2.1203	2.1094	3826.6202	3891.892	5335.844	9457.53	7162.76915	4748.0688	7396.687	3859.2560999999996	0.6628817291982668	0.5217546855774754
CG12241	721.416	830.964	540.788	622.721	3.46689	7.15975	21.5838	42.0365	838.212	807.279	965.533	1469.84	776.19	581.7545	1217.6865	822.7455	0.7495001223927131	0.6756628245447411
lic	3071.0	2176.0	1838.16	1938.63	185.282	259.334	0.0	0.0	1634.84	1486.37	1655.72	2822.67	2623.5	1888.395	2239.195	1560.605	0.7197998856489423	0.6969491268067318
Fcp1	1111.4839	1249.2139	1006.5847	1165.2716	7.46913	10.7626	6.51181	9.78879	997.416	1130.73	1165.53	1960.65	1180.3489	1085.92815	1563.0900000000001	1064.073	0.920006067697441	0.6807496689250139
CG12253	426.0	344.701	274.103	269.8	0.0	1.09953	0.0	3.29894	347.897	302.2	346.0	581.9	385.3505	271.9515	463.95	325.0485	0.7057250477162998	0.7006110572259941
MED25	383.927	433.0	333.686	365.91	2.0	0.0	7.07306	8.0	453.314	434.09	592.0	922.26	408.4635	349.798	757.13	443.702	0.856375171832979	0.5860314609116004
CG12259	462.292	317.96	225.595	213.968	1.13212	0.0	49.7083	27.0404	378.405	355.032	360.868	576.0	390.126	219.7815	468.43399999999997	366.71849999999995	0.5633602989803295	0.7828605523937203
mRpS22	1568.84	927.292	401.037	450.141	1.05706	0.0	18.1637	11.7085	590.963	539.859	1076.94	1764.0	1248.066	425.589	1420.47	565.4110000000001	0.3409987933330449	0.39804501327025565
Mcad	5875.43	3606.42	2540.12	2631.42	8.33144	5.32567	17.4113	21.6172	3095.57	2608.2	3587.67	5678.82	4740.925	2585.77	4633.245	2851.885	0.5454146606411195	0.6155264830588497
PIG-O	976.179	929.628	496.253	680.283	1.03356	1.04099	44.8213	35.3717	652.747	730.717	839.966	1154.96	952.9035	588.268	997.463	691.732	0.6173426795053224	0.6934913876504692
Nfs1	1562.98	997.3	706.014	771.546	1.96423	0.0	0.0	1.1135	837.344	903.432	1098.81	1901.0	1280.1399999999999	738.78	1499.905	870.388	0.5771087537300608	0.5802954187098517
Det	507.0	340.0	224.347	206.119	0.0	0.0	0.0	0.0	279.653	244.881	245.0	428.0	423.5	215.233	336.5	262.267	0.5082243211334121	0.7793967310549778
Polr3C	509.0	296.0	132.067	96.062	0.0	0.0	0.0	0.0	126.933	110.938	412.0	850.0	402.5	114.06450000000001	631.0	118.9355	0.2833900621118013	0.18848732171156896
euc	46.8849	25.0	12.0	18.0000000165952	0.0	0.0	6.11502	3.0	9.0	11.0000074415	7.0	21.0	35.94245	15.0000000082976	14.0	10.00000372075	0.4173338213810578	0.7142859800535714
CG1227	757.0	553.9998	314.3673	330.1056	2.30107	0.0	0.0	0.0	344.126	343.933	351.209	571.999	655.4999	322.23645	461.60400000000004	344.0295	0.49158886217984166	0.7452914186185561
Strump	536.964000021149	601.791	255.822009986849	349.5980284715	0.0	0.0	1.036165	9.20856	348.17742805	397.40135	316.000053518	518.0	569.3775000105745	302.7100192291745	417.000026759	372.789389025	0.5316508278313642	0.8939792928129691
angel	507.0	259.0	100.0	82.0	0.0	0.0	0.0	0.0	170.0	168.0	227.0	471.0	383.0	91.0	349.0	169.0	0.23759791122715404	0.48424068767908307
Aos1	3074.0	1991.0	1515.0	1521.99	0.0	6.00857	2.00313	3.00145	1787.0	1627.01	1957.0	2909.99	2532.5	1518.495	2433.495	1707.005	0.5996031589338597	0.7014623001074587
CG12279	623.203	317.518	140.569	181.291	1.00701	1.0	0.0	0.0	284.798	220.961	473.065	806.538	470.3605	160.93	639.8015	252.8795	0.34214182525956155	0.395246807017489
Ptpmeg	2345.095	2285.3376	1651.83940015096	1692.8664	130.5319	253.89513	4.91024	3.65478	1307.157	1260.136	1750.468	2774.109	2315.2163	1672.3529000754802	2262.2885	1283.6464999999998	0.7223311705586558	0.5674106109808718
kek1	427.0	346.0003	30.29146	32.4581	15.0797	27.6435	0.0	0.0	23.7085	17.5418	225.92	417.356	386.50014999999996	31.37478	321.638	20.625149999999998	0.08117663084994922	0.06412535210391807
Diap1	2251.59639123713	1704.8545	1001.6267	857.2675	7.0330017516	7.01195	67.2407	62.1425	1437.3714	1149.7318	1937.9655	3201.9837	1978.225445618565	929.4471000000001	2569.9746	1293.5516	0.46983881541841876	0.5033324453868143
kar	3888.514	1740.6305	211.205	198.029	3.20221	2.12794	36.4847	6.36597	265.7953	250.9714	1832.801	3969.869	2814.57225	204.61700000000002	2901.335	258.38335	0.07269914638005828	0.08905671010069503
CG12288	1836.97	1380.96	611.016	617.049	1.0	1.00032	13.027303	19.03957	2476.9799	1792.9495	1792.9965	3254.995	1608.9650000000001	614.0325	2523.99575	2134.9647	0.38163198080753774	0.8458669948235847
CG12290	310.0	310.9998	85.7121	63.802853	0.0	1.21874	0.0	0.0	63.2879	51.1971	192.0	487.781	310.4999	74.7574765	339.8905	57.2425	0.24076489718676233	0.16841453350417268
spict	839.0	698.0	405.804	457.28	0.0	2.26362	0.0	0.0	536.197	461.721	596.0	1023.74	768.5	431.542	809.87	498.959	0.5615380611581001	0.6160976453010977
stj	6.0000029	4.0	3.57764	5.96194	11.0821	27.0617	0.0	0.0	67.42233069	74.038061723	417.9179	1054.9370488884	5.00000145	4.76979	736.4274744442	70.7301962065	0.9539577233522603	0.09604502637531526
klu	98.5689	66.9656	8.33469	5.21805	0.0	0.0	5.43105	1.0344	187.665074176	95.7819776	61.0	141.0005	82.76724999999999	6.77637	101.00025	141.72352588799998	0.08187260057571082	1.4031997533471452
Fadd	407.0	299.0	195.452	236.0	0.0	0.0	0.0	0.0	226.106	217.204	209.0	361.227	353.0	215.726	285.1135	221.655	0.6111218130311614	0.7774272351186458
sub	1072.6719	1128.1537	1027.8204	1006.6703	3.06527	5.09651	66.3236	93.8415	1672.86	1546.66	1647.93	2646.9	1100.4128	1017.24535	2147.415	1609.76	0.9244215897888501	0.7496268769660266
CG12299	934.948	1312.87	774.522	679.009	1.10782	2.23123	0.0	0.0	1291.74	1247.91	1936.76	3095.02	1123.9089999999999	726.7655	2515.89	1269.825	0.6466408757292629	0.5047219870503082
CG12301	1672.0	1273.95	584.597	717.87	0.0	2.07061	0.0	1.04689	823.403	681.13	1077.0	1981.93	1472.975	651.2335	1529.4650000000001	752.2665	0.44212121726438	0.4918494375484237
AIMP2	2354.744	1262.0	696.088	676.584	1.09128	1.12082	2.25172	0.0	945.912	884.417	1310.908	2518.88	1808.372	686.336	1914.894	915.1645000000001	0.3795325298113441	0.47791914330506025
polo	10508.81	8396.11	6514.203	7022.41	1.11363	13.7059	2.19516	9.88588	7386.8	6617.59	7243.89	11385.3	9452.46	6768.306500000001	9314.595	7002.195	0.7160365132462874	0.7517444397743541
zuc	407.0	247.0	144.0	176.0	0.0	0.0	0.0	0.0	119.635	154.891	334.858	539.301	327.0	160.0	437.07950000000005	137.263	0.4892966360856269	0.3140458429187367
CG12316	1507.46	2018.083	1081.271	1334.952	1.00859	0.0	44.541596302	52.917124145	1045.73000005437	1046.046322	1187.99000135271	1918.00000964264	1762.7715	1208.1115	1552.9950054976748	1045.888161027185	0.6853477606144642	0.6734652444629199
JhI-21	3354.99530012232	1947.4343	820.13500647315	859.86454043	25.05790972815	55.1425	3.00642	0.0	1129.623	1029.765	1750.947	2928.972	2651.2148000611596	839.999773451575	2339.9595	1079.694	0.3168358042630863	0.4614156783482791
CG12320	193.3449	122.9804	56.2995	60.6773	0.0	2.06829	24.4868	8.13808	100.911	88.2515	226.99	325.305	158.16264999999999	58.4884	276.14750000000004	94.58125	0.3697990644441023	0.34250264804135466
CG12321	1022.91	654.0	424.867	441.0	4.0	4.0111	55.0898	36.0	636.133	645.0	756.0	1236.99	838.4549999999999	432.9335	996.495	640.5665	0.5163467329791104	0.6428195826371432
Prosbeta5	5906.835	3896.815	2250.829	2343.953	3.05856	5.09536	2.16647	2.18787	2600.17	2309.05	3471.94	5146.9	4901.825	2297.391	4309.42	2454.61	0.4686807464566769	0.5695917316019325
CG12325	1712.8	1406.1063	640.931	701.987	1.01998	1.02399	37.1116	20.672	484.888	481.902	1026.74	1846.63	1559.4531499999998	671.4590000000001	1436.685	483.395	0.4305733711846362	0.33646554394317474
CG1233	694.757	705.8677	509.943	607.929	1.026830206006	3.05986	9.24298	6.13246	464.057	411.071	708.973	1035.94	700.3123499999999	558.9359999999999	872.4565	437.564	0.798123865729342	0.5015310218904897
Wdr37	723.0	710.997	475.981	479.579	0.0	2.00458	0.0	1.00261	534.019	486.421	612.0	942.995	716.9984999999999	477.78	777.4975	510.22	0.666361226697127	0.6562336213299722
Daao1	317.50298	201.5291	80.99437	70.417	0.0	0.0	4.49691	3.47044	102.006	92.583	201.0	381.0	259.51604	75.705685	291.0	97.2945	0.29171871226148494	0.33434536082474225
Noc3	2232.87	1746.87	639.291	695.946	3.28027	4.46789	1.13281	1.12537	1124.71	1016.05	1775.72	3202.53	1989.87	667.6185	2489.125	1070.38	0.3355086010643912	0.4300225983026164
wde	2669.977	2709.985	1474.027	1600.101	3.01202	5.01326	6.02683	2.01183	3688.9659	3851.9101	3839.982	6945.987	2689.9809999999998	1537.064	5392.9845000000005	3770.438	0.5714032924396121	0.6991375554667364
CG12341	363.713	276.77	228.238	222.984	0.0	0.0	9.2873	5.23031	232.901	252.618	206.301	382.149	320.2415	225.611	294.225	242.7595	0.7045026956218978	0.8250811453819356
dgo	366.90254	356.9086	42.3736	44.0	0.0	0.0	6.097520486789	4.09103	65.6264	65.9999525126	25.000036	36.0	361.90557	43.186800000000005	30.500018	65.81317625630001	0.11933168091333882	2.1578077841232752
CG12343	769.0	527.0	373.797	324.449	1.046	1.03664	0.0	0.0	281.203	262.551	355.954	599.963	648.0	349.12300000000005	477.95849999999996	271.87699999999995	0.5387700617283951	0.5688297205719743
cag	173.13298	127.717	37.9343	38.9852	0.0	0.0	0.0	0.0	255.123	225.429	190.098	385.46	150.42499	38.45975	287.779	240.276	0.2556739408791052	0.8349323612911297
san	2602.0	1480.99	910.872	940.868	1.0	5.02927	0.0	3.00571	1055.13	1034.13	1292.0	2369.97	2041.495	925.87	1830.985	1044.63	0.4535254801015922	0.5705289775721812
CG12355	28.80923	22.7738	1.76375	9.19839	0.0	6.75747	5.19076	1.22619	18.236245	20.801647	49.99998	184.24275	25.791515	5.48107	117.121365	19.518946	0.21251446454386258	0.16665572502506268
Cbp20	836.0	537.0	401.882	427.739	1.00972	1.01114	0.0	0.0	351.118	320.261	450.99	689.989	686.5	414.8105	570.4895	335.6895	0.6042396212672979	0.588423625675845
Paip2	2240.545	2401.357	1699.566	1881.615	135.283	240.682	95.4519	121.64	2093.44	1932.39	2051.72	3472.32	2320.951	1790.5905	2762.02	2012.915	0.7714900056054609	0.7287836438548598
Ulp1	3521.0	3112.0	3028.5	3455.19	2.0	5.00233	4.00107	2.0	4305.79	4397.44	3998.77	6411.69	3316.5	3241.8450000000003	5205.23	4351.615	0.9774898236092266	0.8360082071301365
CG1236	1792.0	1056.98	571.981	610.39	2.02155	2.01926	0.0	1.01574	325.019	310.61	386.978	649.981	1424.49	591.1855	518.4795	317.8145	0.4150155494247064	0.6129740905860309
Dlc90F	2218.42	1349.4	851.278	880.321	1.55007	7.58391	155.576	93.6022	1228.72	1172.68	1267.45	2176.42	1783.91	865.7995000000001	1721.935	1200.7	0.4853381056219204	0.6972969362955048
O-fut1	1242.00000007051	1042.0003	717.0150494	745.00376531	0.0	0.0	0.0	0.0	949.985	954.996	1088.0	1573.0	1142.000150035255	731.0094073549999	1330.5	952.4905	0.6401132323252607	0.7158891394212702
Hen1	328.787	228.0	221.076	248.0	0.0	0.0	41.2129	30.0	199.924	169.0	107.0	218.0	278.3935	234.538	162.5	184.462	0.8424693823670452	1.1351507692307692
Lac	1596.95	1394.89	1514.12	1454.55	497.163	764.001	435.046	332.105	1022.88	997.45	897.837	1451.0	1495.92	1484.335	1174.4185	1010.165	0.9922556019038451	0.8601405716956945
spt4	488.395	328.714	219.93	200.675	0.0	0.0	6.60544	3.28628	432.07	408.96	502.0	880.0	408.55449999999996	210.3025	691.0	420.515	0.5147477264355185	0.6085600578871201
mRpL18	751.936	412.0	186.0	180.0	7.0	3.00335	43.0639	29.0	298.0	289.0	476.0	750.997	581.9680000000001	183.0	613.4984999999999	293.5	0.31445027905314377	0.4784037776783481
CG12375	611.981	477.9	279.922	277.514	0.0	1.00129	6.01902	4.02446	373.0	268.486	545.0	794.999	544.9404999999999	278.718	669.9995	320.743	0.5114650131528122	0.4787212527770543
CG12379	102.67	49.6507	17.8532	12.707	1.06739	0.0	0.0	0.0	39.5211	29.7098	65.823	109.419	76.16035	15.280100000000001	87.621	34.615449999999996	0.20063064311022732	0.3950588329281793
CG12384	2394.0	1232.41	518.295	464.59	1.34439	2.83509	0.0	2.59288	537.705	603.41	1041.66	2036.16	1813.205	491.4425	1538.91	570.5575	0.27103526628263214	0.37075430012151456
Fpps	1322.95	943.0	664.633	682.716	4.22977	4.22824	1.05304	0.0	691.367	746.284	896.77	1544.77	1132.975	673.6745000000001	1220.77	718.8254999999999	0.5946066771111456	0.5888295911596778
CG1239	1177.985	785.0004	411.426000664003	414.18507	0.0	0.0	1.01479	0.0	591.574	519.815	629.0	1008.0	981.4927	412.8055353320015	818.5	555.6945000000001	0.4205895116000369	0.6789181429444106
dare	568.77	631.805	359.035	360.529	0.0	1.03907	1.35513	0.0	443.292	455.619	692.515	951.607	600.2874999999999	359.78200000000004	822.0609999999999	449.45550000000003	0.5993494783749455	0.5467422733836055
CG12391	1937.57	1757.76	1528.52	1452.12	3.24051	4.26817	189.432	151.245	2479.48	2260.88	2252.76	3824.73	1847.665	1490.32	3038.745	2370.1800000000003	0.8065964338773532	0.7799864746795142
IPIP	700.875	431.461773	245.734731928	273.551900546	5.51486	4.37114	21.7787	6.01325	318.976	291.989	403.489	641.629	566.1683865	259.643316237	522.559	305.48249999999996	0.4585973403462011	0.5845894913301656
Nnp-1	3971.8	3475.91	2032.05	1929.92	1.07104	5.34733	2.19549	1.08914	2544.95	2537.08	3591.93	6523.65	3723.855	1980.9850000000001	5057.79	2541.015	0.531971572469927	0.5023963035238711
CG12398	723.942	437.0	52.0	44.0	0.0	0.0	45.0583	21.0	59.0	62.0	332.0	320.0	580.471	48.0	326.0	60.5	0.0826914695135502	0.18558282208588958
Mad	2359.313	2479.8945	2006.9359	1940.0058	6.68207	5.41853	96.6922	123.107	2464.072	2252.002	3425.315	4808.58	2419.60375	1973.47085	4116.9475	2358.0370000000003	0.8156173712327895	0.5727634369882055
Non2	4838.51	3188.41	2104.13	2270.87	3.44413	11.718	122.491	94.5869	3020.87	2866.13	3621.56	6280.28	4013.46	2187.5	4950.92	2943.5	0.5450409372461666	0.5945359650327616
ND-B14.5B	1046.0	640.767	339.501	276.1408	14.1509	19.528	0.0	1.23354	273.499	287.86	494.849	894.472	843.3835	307.8209	694.6605	280.6795	0.3649833083051779	0.40405277110185484
Vha68-1	55.031439	49.02340450386	52.0274	47.215101	0.0	0.0	0.0	0.0	32.8357	32.8579	21.6969	58.7965	52.02742175193	49.6212505	40.246700000000004	32.8468	0.9537518644801818	0.816136478270268
Yip1d1	1423.77	846.0	494.811	509.82	1.10711	1.12641	2.2269	1.0	575.189	532.18	730.893	1327.87506	1134.885	502.3155	1029.3840300000002	553.6845	0.4426135687756909	0.5378794345585485
Atg2	1401.001	1499.87	822.299	1094.267	3.104557	1.034284	0.0	3.128454	1278.701	1300.731	1607.894	2635.969	1450.4355	958.283	2121.9315	1289.716	0.6606863938451589	0.6078028437770021
cv	453.688	354.1875	174.89516	165.1287	0.0	0.0	0.0	1.2921	192.637	196.67	216.0	377.752	403.93775	170.01193	296.876	194.6535	0.4208864608469993	0.6556727387865642
mIF2	389.0	307.0	169.062	169.0	0.0	0.0	0.0	0.0	164.938	140.000386	201.00035	408.0	348.0	169.031	304.500175	152.469193	0.4857212643678161	0.5007195578787433
nAChRalpha4	56.3888	37.27812	20.4414	18.19579	0.0	1.07493	306.31	346.925	400.638	347.252	324.07246	408.39849	46.83346	19.318595000000002	366.23547499999995	373.945	0.41249557474506476	1.0210507324556695
Hsp83	76701.183	59829.966	23946.449	24444.066	57.0707	122.831	2714.8	2152.06	42663.5	37636.9	75023.9	124806.0	68265.5745	24195.2575	99914.95	40150.2	0.3544283876201759	0.4018437681247901
ckn	437.8991	248.1595	130.10292	106.5788	4.7061	11.7865	81.1012	46.84020291734	151.897692036	137.421	307.2935	666.2136	343.0293	118.34086	486.75355	144.659346018	0.344987614760605	0.29719217459841846
CROT	517.925900441705	473.94333	391.6551	454.9067990693	5.2752	4.20696	1.07402	1.05644	1218.3451	1077.0942	994.7247	1674.7957	495.9346152208525	423.28094953465	1334.7602	1147.71965	0.853501523272684	0.8598695481030975
raw	993.4723	965.6376	431.8686	420.75051255	7.74336	21.05594	113.5271	123.3625	1100.132	1134.249	1349.257	2163.944	979.55495	426.309556275	1756.6005	1117.1905000000002	0.4352073931891212	0.6359957770705406
ths	55.65831	38.31024	59.5351	53.3297	0.0	5.67581	5.3416785905424	3.689741	42.4649012455023	79.670200120598	22.0000008906078	43.324100521913	46.984275	56.4324	32.6620507062604	61.06755068305014	1.2010912161568952	1.8696790116532762
Gfat1	337.942233031545	194.938792178608	42.8200046481	25.69359	3.8578175482	6.73793683618	1.05779	0.0	8.36642	16.604315041	103.8345	193.5778	266.4405126050765	34.25679732405	148.70615	12.485367520499999	0.12857202903984094	0.08395999439498635
MED27	489.57	290.14	163.129	197.0	1.00431	0.0	0.0	0.0	207.109	187.28	236.996	369.0	389.855	180.0645	302.998	197.1945	0.461875569121853	0.6508112264767425
CG1246	34.9083	13.85364	5.39504	2.37423	2.42367	5.32212	1.09171	1.14636	2.604960067813	3.625770217107	34.5764	40.6779	24.380969999999998	3.884635	37.62715	3.11536514246	0.1593306172806086	0.08279567127619285
dnr1	304.941	253.798	63.7475	56.4475	0.0	0.0	95.0588	62.2024	185.252	141.552	360.0	442.0	279.3695	60.0975	401.0	163.402	0.21511832895144242	0.4074862842892768
SmD2	2228.99	1487.0	717.806	682.707	1.0	4.00315	2.00723	1.0	794.194	620.293	986.0	1895.0	1857.995	700.2565	1440.5	707.2435	0.3768882585798132	0.490970843457133
CG12499	2984.03	3046.97	1811.17	2386.82	3.02121	5.04297	91.9712	94.0344	2843.83	3148.18	3007.98	5073.96	3015.5	2098.995	4040.9700000000003	2996.005	0.6960686453324489	0.7414073848605657
Sec23	4928.9337	3283.4731	1518.70375	1635.78188	1.25609	2.51297	23.0684	22.5252	1579.2979	1448.2206	2141.7438	3503.484	4106.2034	1577.242815	2822.6139000000003	1513.75925	0.3841121983874447	0.536296958645318
Arc1	680.987	389.0	375.161	296.146	21.0039	11.0073	3.01288	4.0	2011.84	1780.85	5548.0	9269.99	534.9935	335.6535	7408.995	1896.3449999999998	0.6273973422106998	0.2559517181480079
Acsf2	619.0	364.0	242.713	284.851	1.02167	1.02651	0.0	0.0	217.287	217.149	284.978	507.973	491.5	263.782	396.4755	217.21800000000002	0.5366876907426246	0.5478724410461681
CG12517	167.55	81.4998	7.7289	27.1278	0.0	0.0	7.4498	6.50019	5.2711	13.8722	61.0	97.0	124.5249	17.428350000000002	79.0	9.57165	0.13995875523690443	0.12116012658227848
Zw	705.03	457.6634	127.781	134.91246	0.0	2.01582	2.01058	0.0	207.20986	172.0	474.0003	797.984	581.3467	131.34673	635.99215	189.60493	0.22593528096056964	0.29812463880253864
Cdc42	5379.55	3463.323	2602.999	2697.074	6.54453	6.70659	5.34557	9.60795	2458.8919	2179.93	3233.457	5698.295	4421.4365	2650.0365	4465.876	2319.41095	0.5993609769132725	0.5193630432192922
AP-1-2beta	4221.57	2846.7	1768.42	2097.64	2.19341	6.61434	213.429	139.296	2244.58	2203.36	2710.81	4693.39	3534.1349999999998	1933.03	3702.1000000000004	2223.9700000000003	0.5469598642949407	0.6007320169633451
Alr	897.8523	578.4029	366.55315	409.702	3.11728	4.24512	0.0	0.0	454.633	362.866	612.883	1099.75	738.1276	388.127575	856.3165	408.7495	0.5258272079244835	0.47733460700570407
CG12535	6.34165	7.23688	1.09915	3.0	195.338	374.726	0.0	0.0	0.0	0.0	1.0	2.0	6.789265	2.049575	1.5	0.0	0.30188466645505807	0.0
rdx	16984.999	13575.4186	8059.9603	8547.682	32.14998	41.4485	1739.970393724	1495.580169	15073.0510002277	13872.3192	15874.8260051044	25901.5234	15280.2088	8303.82115	20888.174702552198	14472.68510011385	0.5434363665239967	0.6928649968800539
CG12541	38.0	16.0	60.65071	83.0	1.0	0.0	0.0	0.0	32.3493	47.0	11.0	47.0	27.0	71.825355	29.0	39.67465	2.660198333333333	1.3680913793103449
CG12547	1557.4023	1302.418	602.3714	634.9967	2.53387	2.74118975389	0.0	1.07606	679.628	583.251	1252.78	1876.76	1429.91015	618.6840500000001	1564.77	631.4395	0.43267337461727934	0.4035350243166727
nompB	22.0	6.0	1.0	1.0	0.0	0.0	0.0	1.0	28.0	16.99998	17.000007	49.0	14.0	1.0	33.0000035	22.49999	0.07142857142857142	0.681817806473869
rl	2401.7325	1797.7944	1469.1801	1284.24574	17.29492	27.69831	7.91105	5.58344	1512.32566	1331.96668	2211.506514884	3020.97854	2099.76345	1376.71292	2616.242527442	1422.14617	0.6556514354033546	0.5435834618094395
CG12560	554.997	320.994	194.665	150.379	1.0	0.0	1.00349	1.00604	25.335	28.6211	116.0	221.0	437.9955	172.522	168.5	26.97805	0.39388989156281284	0.16010712166172106
CG12567	1881.7086	2230.55	1305.722	1137.7655	1.16187187	4.5594796	33.2943	37.45	1734.28	1629.23	2814.8406	3434.436	2056.1293	1221.74375	3124.6383	1681.755	0.5941959729867183	0.5382238961866402
CG12576	2181.80204	2472.7011	1295.552	1256.4974910911	3.17698	4.19795	4.250935	2.163597	1273.165	1186.6932	2301.579	3715.469	2327.2515700000004	1276.02474554555	3008.5240000000003	1229.9290999999998	0.5482968674269924	0.40881478758354584
pav	1674.85	2037.58	1460.89	1683.48	1.11901	5.64552	134.15	193.417	2201.11	2125.52	2186.88	3245.35	1856.215	1572.185	2716.115	2163.315	0.8469843202430754	0.7964740079120363
CG12581	868.955	512.907	61.7199	63.0198	0.0	2.0551	4.04522	6.09306	141.28	165.98	598.0	1050.94	690.931	62.36985	824.47	153.63	0.09026928882913055	0.18633788979586885
beta-Man	2280.004	1483.0	94.737000344273	109.42450025096	4.06604	1.02443	0.0	0.0	177.2628	128.5755	414.9343	798.9752	1881.502	102.0807502976165	606.95475	152.91915	0.054254925212737753	0.25194489375031665
Adar	1057.64896	924.8399	658.44890338	679.22718348	80.6011	134.43381	6.23275	4.15969	660.01681	604.79673	919.4945	1693.5657	991.24443	668.83804343	1306.5301	632.40677	0.6747458277571355	0.48403536206322384
RpL8	58364.1608	27791.8632	9985.04364	10850.7	33.319	37.9181	103.833	75.1112	10738.0	9821.26	27199.7	52978.1	43078.012	10417.87182	40088.9	10279.630000000001	0.24183733966182097	0.2564208546505392
CG12643	26.0	10.0	3.09248	4.0	0.0	0.0	1.0	1.0	34.9075	22.0	52.0	120.0	18.0	3.54624	86.0	28.45375	0.19701333333333335	0.3308575581395349
CG12645	2.22129e-06	12.36300174643	0.0	0.567992538716	1.00000009504	0.0	0.0	0.0	27.0	29.0	27.0	79.0	6.18150198386	0.283996269358	53.0	28.0	0.04594292294971655	0.5283018867924528
CG1265	468.0	242.955	132.486	151.946	0.0	1.05464	0.0	1.04502	267.514	232.054	393.0	604.945	355.4775	142.216	498.9725	249.784	0.4000703279391804	0.50059672627249
CG12655	26.0	7.0	3.0	5.0	2.0	0.0	0.0	0.0	8.0	12.0	15.0	30.0	16.5	4.0	22.5	10.0	0.24242424242424243	0.4444444444444444
CG12659	310.0	271.0	164.51	175.272	0.0	1.09681	0.0	0.0	204.49	190.728	217.0	356.903	290.5	169.891	286.9515	197.609	0.5848227194492255	0.6886494756082474
fend	1178.1302	1437.2743	867.6005	890.137	5.26591	3.17332	28.8702	46.7244	1217.4	1119.86	1575.73	2225.83	1307.70225	878.86875	1900.78	1168.63	0.6720709932249486	0.6148160228958639
ed	2671.85	3299.59	3013.09	3118.14	577.549	1111.01	127.94	155.831	4049.4058	4352.42	4481.44	7401.99	2985.7200000000003	3065.615	5941.715	4200.9129	1.0267590396956177	0.70702026266827
CHES-1-like	1165.9051	1265.8311	571.48686632	547.89630627412	1.0363300346	2.0593105992	22.0956	18.1692	607.573300089081	552.476500021934	1456.9640214604	2689.9447	1215.8681000000001	559.69158629706	2073.4543607302003	580.0249000555075	0.46032261747557973	0.279738445678275
CG12698	4.0	4.0	6.0	6.0	2.0	1.0	0.0	0.0	3.0	8.0	17.99995	55.0	4.0	6.0	36.499975	5.5	1.5	0.1506850347157772
zld	3558.73104	3949.76101	2494.3738146556	2449.12266	24.4826	30.71278	14.2705	11.24	2409.6228	2219.3704	3305.5211	5153.2908	3754.2460250000004	2471.7482373278	4229.40595	2314.4966	0.6583873888040674	0.5472391696048945
CG12702	471.0	533.00035	481.596	555.788	0.0	1.0	0.0	0.0	545.056	587.284	753.333	1071.73	502.000175	518.692	912.5315	566.1700000000001	1.0332506358190015	0.6204388560833243
Abcd3	1967.31934	1948.2707	1183.9796	1359.5059	4.42336	8.78532	7.68378	6.73068	1771.37	1722.4242	1998.24	3600.49	1957.79502	1271.74275	2799.365	1746.8971	0.649579111709049	0.6240333432760644
CG12708	181.0	177.0004	6.0	1.0	0.0	1.0	0.0	0.0	0.0	1.0	4.0	1.0	179.0002	3.5	2.5	0.5	0.019553050778714214	0.2
CG1271	263.0002	194.0004	82.0	65.0	0.0	0.0	0.0	0.0	28.0	28.0	63.0	136.0	228.5003	73.5	99.5	28.0	0.321662597379522	0.2814070351758794
CG12713	264.481	361.64	234.019	235.999	0.0	0.0	0.0	0.0	334.0	271.001	462.0	669.0	313.0605	235.00900000000001	565.5	302.5005	0.7506823760902446	0.5349257294429708
CG12716	502.0	117.0	5.0	26.0	0.0	0.0	0.0	0.0	3.028773	36.5295	14.0983	13.2894	309.5	15.5	13.693850000000001	19.7791365	0.050080775444264945	1.4443809812434047
moon	441.0	239.0	286.0	291.0	0.0	0.0	1.0	0.0	238.0003	181.0001	321.0004	655.9997	340.0	288.5	488.50005	209.5002	0.8485294117647059	0.42886423450724315
CG12730	40.9777	25.7461	31.00005	31.4143	1.04276	0.0	6.0	4.0	31.0	45.5857	23.9572	46.0	33.3619	31.207175	34.9786	38.29285	0.9354136005443335	1.094750790483324
Girdin	2501.210159668	3222.3237	2581.2083709	3287.3788182621	4.27225	5.336278523537	161.78970748294	234.67591396154	3172.70573106525	3269.62982754684	2766.66541994553	4677.5623777515	2861.7669298339997	2934.29359458105	3722.1138988485154	3221.167779306045	1.0253433163934345	0.8654135437130377
mEFTu2	1398.43	737.504	323.81	319.942	4.03211	6.05701	7.08727	1.01266	339.19	311.058	648.968	1282.94	1067.967	321.876	965.954	325.124	0.3013913351255235	0.33658331556161064
Crag	3695.652	3413.916	2183.5126	2572.34570044	178.13	345.996	41.34803802	25.08232	2127.493	2252.6500444462	3016.8700451131	4875.0	3554.784	2377.9291502200003	3945.93502255655	2190.0715222231	0.6689377329874333	0.5550196619315249
Prx4	897.0	573.9999	251.37748	280.5694	2.01739	3.01284	0.0	0.0	308.6218	230.4301	504.9821	767.987	735.49995	265.97344	636.48455	269.52595	0.36162264864871846	0.42346031808627566
RpL28	35458.8173	17343.67864	3940.88632	4020.59941	38.53532	56.7466	20.16738	15.3598	6447.1166	5713.4	14856.507	32151.262	26401.24797	3980.742865	23503.8845	6080.2582999999995	0.15077858703964894	0.2586916345678945
otu	9719.9509	7646.9294	3932.86797364	4770.480824904	1.00075	11.0095	4.00445	5.00352	2415.12531112	2229.499	4190.0026939	6998.995	8683.44015	4351.674399272	5594.49884695	2322.31215556	0.5011463572155789	0.4151063784428295
CG12744	1403.0001	612.1707	120.0	156.99967	0.0	1.00451	0.0	0.0	82.0	79.0	316.0	887.995	1007.5853999999999	138.49983500000002	601.9975	80.5	0.13745716740238598	0.13372148555434202
CG12746	781.9996	527.998	280.3656	311.7845	1.0	2.0022	0.0	1.00186	520.634	508.2147	557.99954	1049.9977	654.9988000000001	296.07505	803.99862	514.42435	0.45202380523445224	0.6398323793142829
Hrb87F	8783.8971	5488.971	4006.994	4855.3679	20.0195	24.0669	17.0949	8.0284	4716.0089	5018.639587	5050.982734	10147.9312	7136.43405	4431.18095	7599.456967	4867.324243499999	0.620923688070795	0.6404831640781629
CG1275	1207.9179	1012.9632	484.1667	504.87665	16.448	9.76713	1.0815	1.03676	529.8337	461.1243	1076.5556	1859.231	1110.44055	494.52167499999996	1467.8933	495.47900000000004	0.4453382713734652	0.3375442888117277
ncm	3401.91	3217.95	2626.86	2815.29	3.08406	8.24441	3.09353	2.05474	3047.14	3129.71	3195.92	5606.76	3309.93	2721.075	4401.34	3088.425	0.8220944249576275	0.7017010728550851
Nxt1	898.9999	572.9995	327.5244	310.0002	0.0	1.0	0.0	1.0	381.475	341.0	501.0	809.0	735.9997000000001	318.7623	655.0	361.2375	0.43310112762274217	0.5515076335877863
ema	1408.4129	1614.6982	1212.453	1386.7434	3.1379	2.11271	10.58659	5.30617	1175.548	1131.258	1144.862	1822.888	1511.55555	1299.5982	1483.875	1153.403	0.8597753486466309	0.7772912138825709
Eaf6	327.0	246.865	194.061	162.285	0.0	1.23111	0.0	1.13541	232.939	203.715	214.0	333.769	286.9325	178.173	273.8845	218.327	0.6209578907931308	0.7971498934769948
sano	157.03089	68.7368301	24.85085	29.0792	0.0	1.444682	8.96912	7.2632	30.1491	50.9208	39.0	95.5553	112.88386005000001	26.965025	67.27765	40.53495	0.2388740515079507	0.6025024655290427
Dbp45A	1002.0	545.0	163.436	173.664	0.0	1.02691	0.0	0.0	252.906	267.336	541.0	1235.97	773.5	168.55	888.485	260.121	0.21790562378797673	0.29276915198343245
TfIIEbeta	607.0	334.0	220.33	248.239	3.07158	1.02181	0.0	0.0	318.6696	291.7608	340.928	613.9785	470.5	234.2845	477.45325	305.2152	0.4979479277364506	0.6392567230404232
fsd	358.0	187.0	67.0	62.0	1.0	0.0	0.0	0.0	75.0	65.0	113.0	192.0	272.5	64.5	152.5	70.0	0.23669724770642203	0.45901639344262296
Dlip3	211.427	176.123	193.754	179.071	0.0	1.01648	21.5727	28.8768	202.246	200.929	284.0	563.984	193.77499999999998	186.4125	423.992	201.5875	0.9620049025932139	0.47545118775825956
CG12768	16.99999	5.0	14.47566	6.87011	0.0	0.0	0.0	0.0	32.52435569	21.12991725	29.99996765	75.0001000139206	10.999995	10.672885	52.5000338319603	26.82713647	0.970262713755779	0.510992746325975
CG12769	140.99972	140.8003	46.61772563	57.2667	1.0	3.05761	0.0	1.19976	58.3823	49.73332	94.00002	186.9425	140.90001	51.942212815000005	140.47126	54.05781	0.36864591290660664	0.3848318154190402
Vps28	589.0	373.9548	219.3081	224.8199	5.02103	3.00526	16.0	8.04523	266.691	225.18	385.979	579.995	481.4774	222.064	482.98699999999997	245.9355	0.46121375582737634	0.5091969349071507
Rubicon	415.949059	575.085	283.1559	295.1882	2.07056	2.05207	1.0506	2.09904	435.845	409.812	621.929	835.948	495.51702950000004	289.17205	728.9385	422.8285	0.5835764116760794	0.580060594961029
CG12773	2693.0	2023.99700079179	1507.095178658	1776.4238	299.137	520.112	0.0	0.0	1109.91	1095.58	1461.86	2735.89	2358.498500395895	1641.759489329	2098.875	1102.745	0.6961036816658632	0.5253981299505687
RpL21	45570.8919	21793.9049	7543.7728	7355.9412	22.5675	39.0129	14.1368	10.1003	9691.22	9014.06	23311.4	45349.0	33682.398400000005	7449.857	34330.2	9352.64	0.22117952859318946	0.2724318530040606
nahoda	301.3537	222.6957	217.83270495459	277.1878214	3.02426	2.11767	9.06573	8.93033	214.814	309.2604	129.4567	255.712	262.0247	247.51026317729503	192.58435	262.0372	0.9446066083743061	1.36063600183504
Mat89Ba	2412.87	2108.99	1495.52	1628.16	5.01114	0.0	17.0896	4.01489	1511.47	1533.84	1831.92	3228.91	2260.93	1561.8400000000001	2530.415	1522.655	0.6907953806619401	0.601741216361743
hoe1	2464.6262	2665.36054	1784.05027722816	1916.38130286931	8.77858	13.1526600951582	33.37711	25.642061	2033.95302	1795.6209	2528.22598	3502.8491	2564.99337	1850.215790048735	3015.5375400000003	1914.78696	0.7213335565263995	0.6349736770313925
l(2)09851	3055.57	1793.694	876.446	832.335	56.988	93.3929	5.42997	4.31032	874.554	834.665	1958.01	3256.61	2424.632	854.3905	2607.31	854.6095	0.3523794538717628	0.32777441117473566
CG12795	1534.95	1444.98	1045.27	952.437	3.02656	5.03474	3.04841	2.02497	1157.73	1027.56	1573.97	2308.97	1489.9650000000001	998.8534999999999	1941.4699999999998	1092.645	0.670387223860963	0.5627926262059162
Ciao1	983.874	530.785	306.453	300.759	1.00143	1.00084	26.1263	20.215	379.547	392.642	717.056	1226.4	757.3295	303.606	971.7280000000001	386.09450000000004	0.4008902333792622	0.39732775015230604
Cyp6d4	31.0	29.0	43.5113	37.596	0.0	1.04594	0.0	1.0	25.4887	9.404	86.0	223.954	30.0	40.55365	154.977	17.446350000000002	1.3517883333333331	0.11257380127373741
CG12811	1129.99	576.0	176.474	193.338	1.0	1.00295	1.01019	0.0	264.526	144.662	340.0	714.997	852.995	184.906	527.4984999999999	204.594	0.21677266572488701	0.38785702708159364
Fancl	168.00026	174.0005	144.27	152.4126	0.0	1.18096	0.0	0.0	70.7305	55.5877	94.0	135.819	171.00038	148.3413	114.9095	63.1591	0.867491054698241	0.5496421096602109
CG12818	327.0	252.902	166.481	158.038	0.0	1.08438	0.0	2.09835	210.519	194.962	235.0	337.916	289.951	162.2595	286.45799999999997	202.7405	0.5596100720466561	0.7077494781084837
CG12825	28.0	13.0	6.0	6.0	0.0	0.0	9.0	2.0	30.2112	24.0	115.0	191.0	20.5	6.0	153.0	27.105600000000003	0.2926829268292683	0.1771607843137255
Tsp42El	58.9835	28.9306	34.4319	23.3127	0.0	0.0	1.01649	1.06942	46.5681	52.6873	51.0	90.0	43.957049999999995	28.8723	70.5	49.627700000000004	0.65682979180814	0.7039390070921987
Tsp42Ei	17.0	10.0	13.0	7.999999	0.0	1.0	2.0	1.0	18.0	18.0	10.0	20.0	13.5	10.4999995	15.0	18.0	0.7777777407407407	1.2
Tsp42Ef	1011.0	721.0	426.605	439.389	1.00837	0.0	0.0	0.0	415.395	363.611	604.992	972.0003	866.0	432.997	788.49615	389.503	0.4999965357967668	0.49398212026780347
Tsp42Ed	97.0	48.00003	41.25067	45.66377	1.15606	2.1946	0.0	0.0	134.749	117.336	58.8439	248.805	72.500015	43.45722	153.82445	126.04249999999999	0.5994098070186605	0.8193918457046326
CG12848	383.991	220.985	106.0	89.2894	0.0	0.0	2.00866	4.01488	222.0	263.711	318.0	681.0	302.488	97.6447	499.5	242.8555	0.32280520218983894	0.48619719719719723
CG12851	20.0	17.0	59.8343	44.7637	2.0	0.0	0.0	0.0	12.16568	13.23638	9.0	14.0	18.5	52.299	11.5	12.70103	2.826972972972973	1.1044373913043477
HPS1	111.875	155.808	87.0	75.5043	0.0	0.0	16.1252	37.1916	194.0	225.496	258.0	416.0	133.8415	81.25215	337.0	209.748	0.607077401254469	0.6223976261127596
ND-B15	1157.91	574.971	287.0	247.304	3.01632	2.01928	28.0945	17.0287	309.0	322.696	552.984	1047.98	866.4405	267.152	800.482	315.848	0.3083327706865041	0.3945722702072002
CG12863	300.583	236.578	140.464	141.025	0.0	0.0	31.0409	30.1512	224.416	185.301	215.783	417.166	268.58050000000003	140.74450000000002	316.4745	204.8585	0.5240309702305268	0.6473143965785553
Su(var)2-HP2	2542.941	2902.848	3132.074	4186.498	5.054874	7.09203	7.06182	16.1565248	3159.927442	3583.5035379307	2652.94690711692	4729.9089	2722.8945	3659.286	3691.4279035584605	3371.71548996535	1.3438956228381234	0.9133905843630552
CG12868	116.0	102.0	51.0	42.0	0.0	0.0	0.0	0.0	86.0	86.0	71.0	113.0	109.0	46.5	92.0	86.0	0.42660550458715596	0.9347826086956522
ALiX	2763.13	2199.92	1279.37	1445.28	5.2304	8.41767	60.8697	52.0792	1432.63	1429.72	2103.77	3090.58	2481.525	1362.3249999999998	2597.175	1431.1750000000002	0.548987014033709	0.5510506608141539
CG12877	1957.82	1577.75	979.33	1137.57	1.01338	3.06426	30.177	19.2462	1470.67	1451.43	1551.99	2783.94	1767.7849999999999	1058.45	2167.965	1461.0500000000002	0.5987436254974446	0.6739269314772148
btz	2843.25200003359	2556.05900062713	1805.05840624851	1991.34350539676	65.35942	84.3784	39.7498	35.9414	2177.94	2042.66	2360.64	3991.62	2699.65550033036	1898.200955822635	3176.13	2110.3	0.7031271047696085	0.6644249448227875
CG12880	181.563	102.784	78.596	64.3787	1.02397	0.0	2.13178	0.0	93.136	49.0898	47.7994	92.9101	142.1735	71.48734999999999	70.35475	71.1129	0.5028176840269107	1.0107761025374975
CG12883	689.607	453.0	245.959	298.3	1.37187	0.0	1.3935	0.0	486.041	455.7	507.628	934.0	571.3035	272.1295	720.814	470.8705	0.47633088192178064	0.6532482720923845
whd	1879.6144	1969.091	1556.2603	1490.2014	4.44644373622	2.215561	277.1526	225.6496	2652.236	2565.8876	2825.768	4241.888	1924.3527	1523.23085	3533.828	2609.0618	0.7915549212989905	0.7383103535316377
Caf1-105	2180.27	2123.06	2019.29	2168.79	11.647	9.4518	14.7335	14.9381	2466.71	2462.21	2150.35	3728.55	2151.665	2094.04	2939.45	2464.46	0.9732184145766186	0.8384085458163942
CG12895	441.9816	219.9998	136.6027	127.4568	0.0	1.0	2.01858	0.0	154.397	172.543	224.0	472.0	330.9907	132.02975	348.0	163.47	0.39889262749678467	0.4697413793103448
CG12909	1854.0	867.0	352.0	363.0	0.0	2.0028	0.0	0.0	446.0	406.0	761.0	1481.0	1360.5	357.5	1121.0	426.0	0.2627710400588019	0.3800178412132025
Alg2	693.645	444.0	275.957	279.278	0.0	2.00598	68.3551	46.0	304.043	380.722	403.0	676.994	568.8225	277.6175	539.9970000000001	342.3825	0.4880564675272163	0.6340451891399396
CG12910	30.0	17.9413	13.0	8.000004	0.0	1.05757	1.0	1.05869	14.00003	6.0	245.0003	626.942	23.97065	10.500002	435.97115	10.000015000000001	0.4380357645704226	0.022937331977127388
sel	841.345	604.446	313.843	312.297	1.3023	0.0	103.655	54.5536	426.157	356.703	626.698	1017.0	722.8955000000001	313.07000000000005	821.8489999999999	391.42999999999995	0.4330778100015839	0.4762797058827108
egr	226.0158	133.5287	55.2628	57.6266	0.0	0.0	25.984207598	9.471392471	50.73723355	70.3734	22.0	52.0	179.77224999999999	56.4447	37.0	60.555316775	0.313978937238645	1.636630183108108
mRpL42	753.0	438.0	207.0	219.997	1.0	1.00786	0.0	0.0	251.0	234.003	292.0	541.992	595.5	213.4985	416.996	242.5015	0.35851973131822	0.5815439476637666
Lsm11	160.948	118.0	107.316	115.629	0.0	0.0	1.0519	0.0	123.684	117.371	143.0	220.0	139.474	111.4725	181.5	120.5275	0.7992349828641898	0.6640633608815427
CG12929	221.0003	112.9995	50.9802	51.95406	3.23652	3.30622	0.0	0.0	60.0198	61.0459	105.763	168.694	166.9999	51.46713	137.2285	60.532849999999996	0.30818659172849805	0.44110990064017314
CG12935	427.80426	275.167	157.509	146.143	1.0	3.00476	2.1958	0.0	245.491	240.184	257.0	451.995	351.48563	151.826	354.4975	242.8375	0.4319550702542234	0.6850189352534221
mms4	227.0	247.0	157.0	174.222	0.0	0.0	6.0	10.0	290.861	258.176	316.699	487.851	237.0	165.611	402.275	274.5185	0.6987805907172996	0.6824150146044373
Lsm10	143.0	84.0	53.1559	44.213	0.0	0.0	0.0	0.0	52.8441	48.787	78.0	181.0	113.5	48.68445	129.5	50.81555	0.42893788546255507	0.3923980694980695
CG12942	1105.33	1197.84	1053.44	1067.69	2.09099	1.03709	8.84931	3.22826	1344.79	1404.37	1420.84	2215.97	1151.585	1060.565	1818.4049999999997	1374.58	0.920961110122136	0.7559262100577154
CG12947	85.8703	36.7665	1.67628	1.36126	0.0	0.0	0.0	0.0	50.0656	56.0401	198.112	408.643	61.3184	1.51877	303.3775	53.05285000000001	0.024768584959816303	0.1748740430651581
CG12948	1224.465	865.8234	642.8645	615.0078	0.0	1.01444	0.0	2.04317	679.059	635.885	767.0	1330.99	1045.1442	628.93615	1048.995	657.472	0.601769736654521	0.6267637119338033
mRpL41	571.926	280.0	112.845	153.752	1.05139	0.0	1.07365	0.0	214.155	170.248	304.949	519.0	425.963	133.2985	411.97450000000003	192.2015	0.31293445674859083	0.46653737063823125
ebd2	402.4689	365.314	223.856	279.075	0.0	1.01543	21.53131	15.6863	1255.148	1289.9248	625.9998	1111.9842	383.89145	251.4655	868.9920000000001	1272.5364	0.6550432420414677	1.4643821807335393
Trmt112	604.0	342.997	129.0	148.0	0.0	0.0	2.0	1.00333	207.0	201.0	289.0	599.0	473.49850000000004	138.5	444.0	204.0	0.2925035665371696	0.4594594594594595
kune	600.928	484.0	291.671	284.894	3.80383	1.25844	4.07212	0.0	372.329	315.106	578.196	784.742	542.4639999999999	288.2825	681.469	343.7175	0.53143157886975	0.5043773084322251
CG12991	239.78734118739	176.9690721463	164.52751096	168.0716	0.0	0.0	1.090790042993	0.0	122.472	180.7140583212	158.9996	234.9997	208.37820666684502	166.29955547999998	196.99964999999997	151.5930291606	0.798065969278062	0.7695091293847477
CG13001	335.0	364.896	276.602	323.422	0.0	2.14129	0.0	1.10357	310.398	296.578	335.0	522.859	349.948	300.012	428.9295	303.488	0.8573045138134809	0.7075475107214588
CG13003	188.00031	93.0	22.999965	18.0	8.0	9.45432	0.0	0.0	12.0	7.0	12.0	30.5457	140.500155	20.4999825	21.27285	9.5	0.14590718778922343	0.4465786201660803
CG13005	870.85	789.809	502.974	520.185	0.0	3.09376	0.0	3.19068	436.203	378.19	649.69	1035.22	830.3295	511.57949999999994	842.455	407.1965	0.6161162526442815	0.48334510448629303
CG13014	370.937	171.977	104.324	80.5969	0.0	2.0	4.06338	2.02267	223.676	194.403	459.0	598.0	271.457	92.46045000000001	528.5	209.03949999999998	0.34060808894226346	0.3955335856196783
CG13016	711.306	601.421	392.656	366.124	0.0	0.0	0.0	2.0	450.507	426.488	490.0	834.0	656.3635	379.39	662.0	438.4975	0.5780181256270344	0.6623829305135952
CG13018	97.0	77.0	50.5036	33.0	0.0	0.0	0.0	0.0	58.4964	59.0	63.0	119.0	87.0	41.7518	91.0	58.7482	0.4799057471264368	0.6455846153846153
mus302	1158.548	1323.135	1109.967	1117.172	50.1859	75.6792	1.11715	0.0	1217.42	1152.95	1115.81	1641.48	1240.8415	1113.5695	1378.645	1185.185	0.8974308966938969	0.8596738101541731
agt	393.316	302.053	132.666124348	141.624	0.0	0.0	0.0	0.0	242.128	212.514	284.5	464.629	347.68449999999996	137.145062174	374.5645	227.321	0.39445262062013126	0.6068941397276036
CG13067	149.0	31.0	78.0	98.0	0.0	0.0	0.0	0.0	70.0	66.0	14.0	35.0	90.0	88.0	24.5	68.0	0.9777777777777777	2.7755102040816326
CG1307	2738.0	1642.978	798.755	898.565	2.01091	2.01733	0.0	2.02259	1041.25	884.435	1339.99	2539.98	2190.489	848.6600000000001	1939.9850000000001	962.8425	0.38742947351025275	0.4963144044928182
PDCD-5	1206.0	676.0	416.0	481.0	2.0	1.0	0.0	0.0	564.0	529.0	702.0	1254.0	941.0	448.5	978.0	546.5	0.4766206163655685	0.5587934560327198
CG13083	6319.0	2044.0	159.439	598.331	0.0	4.0	2.00184	5.00237	210.561	706.669	301.0	279.0	4181.5	378.885	290.0	458.615	0.09060982900872892	1.5814310344827587
CG13084	2893.64	1242.96	93.0	432.174	0.0	1.0	184.358	58.0444	154.0	763.826	297.0	206.0	2068.3	262.587	251.5	458.913	0.1269578881206788	1.8247037773359842
CG13088	378.0	315.0	156.0	178.0	6.0	5.0	0.0	0.0	280.0	277.0	251.0	435.0	346.5	167.0	343.0	278.5	0.481962481962482	0.8119533527696793
PIG-U	1156.84	842.0	600.534	708.835	0.0	0.0	2.16489	0.0	639.466	633.165	782.0	1213.0	999.42	654.6845000000001	997.5	636.3154999999999	0.6550644373736768	0.637910275689223
CG1309	1506.94	1089.29	841.336	924.49	2.13606	2.15696	0.0	0.0	965.066	880.433	990.864	1569.78	1298.115	882.913	1280.3220000000001	922.7495	0.6801500637462783	0.7207167415696988
Uba4	679.9997	587.0002	341.0003	356.0	2.0	1.00276	0.0	0.0	409.0	377.0	502.0	804.997	633.4999499999999	348.50014999999996	653.4984999999999	393.0	0.5501186700961855	0.6013785800579498
CG13096	4673.997	3233.997	1588.976	1617.204	3.00559	4.00859	1.00382	1.004	1617.03	1428.8	2733.99	4750.99	3953.9970000000003	1603.0900000000001	3742.49	1522.915	0.4054353101431286	0.40692560300762326
CG13097	2580.93	1977.71	1015.72	1115.13	1.05937	3.21654	1.06609	5.28906	1252.28	1227.87	1972.94	3477.78	2279.3199999999997	1065.4250000000002	2725.36	1240.0749999999998	0.4674310759349281	0.4550132826488977
mRpL51	826.0	481.0	186.493	178.498	0.0	2.0	0.0	0.0	212.507	199.502	474.0	847.0	653.5	182.4955	660.5	206.0045	0.27925860749808723	0.31189174867524605
CG13101	538.754	629.097	329.3899	257.8097656	2.0	2.0	10.2465	22.9026	73.6104	52.1898	6.0	19.0	583.9255	293.5998328	12.5	62.900099999999995	0.5028035816212856	5.032007999999999
tai	1124.877118119	688.02885337	305.49564869	267.7248	24.2	54.00314562995	114.124000166475	60.9711	439.5045	377.2754	1196.794	2209.992	906.4529857445	286.610224345	1703.393	408.38995	0.3161887365946481	0.23975086782674343
Ctl1	947.501	776.088	483.463	524.333	0.0	0.0	179.49	142.957	980.357	983.912	1150.9	1828.97	861.7945	503.898	1489.935	982.1345	0.5847078392818706	0.6591794272904523
CG13113	487.0	152.0	24.0	49.0	0.0	0.0	0.0	0.0	13.0	43.0	15.0	23.0	319.5	36.5	19.0	28.0	0.11424100156494522	1.4736842105263157
CG13114	7507.5	2250.23	443.594	632.467	0.0	2.00744	58.5008	23.7685	356.406	726.533	270.0	823.993	4878.865	538.0305	546.9965	541.4695	0.1102778002670703	0.9898957305942544
CG13117	221.62516	79.8198	19.0	48.29095	7.0	1.00274	22.3753	17.1802	99.0	105.709	142.0	173.997	150.72248	33.645475000000005	157.9985	102.3545	0.2232279816521066	0.64781944132381
CG13123	221.9606397605	118.999955679	51.0	55.7733	0.0	0.0	10.0396	6.0	43.0	41.2267	86.0	91.0	170.48029771974998	53.38665	88.5	42.11335	0.3131543686518047	0.4758570621468926
CG13124	418.977513899	186.266792861	387.1844	330.3386	12.08791	9.89984	10.0222	7.73329	340.816	297.661	150.9117	341.0998	302.62215338	358.76149999999996	246.00575	319.2385	1.185509705727017	1.2976871475565104
CG13126	650.998788	598.0	279.387	254.6638	0.0	0.0	1.0016	0.0	424.613	459.336	496.0	916.0	624.4993939999999	267.0254	706.0	441.97450000000003	0.4275831210814594	0.6260262039660057
CG13138	73.0	53.0	4.0	9.0	0.0	0.0	0.0	0.0	3.0	9.0	3.0	3.0	63.0	6.5	3.0	6.0	0.10317460317460317	2.0
dpr19	1.32379	5.0	0.0	2.31577	1.31894	3.68914	2.67621	0.0	9.0	10.68423	23.6811	40.3109	3.161895	1.157885	31.996	9.842115	0.36619969986353124	0.30760454431803974
Nse4	462.0	352.0001	240.0001	238.9999	1.0	3.00515	0.0	0.0	253.0	224.0	287.0	444.995	407.00005	239.5	365.9975	238.5	0.588452016160686	0.6516437953811159
CG13148	117.9389	42.000047	5.0	6.0	1.0	0.0	1.06116	0.0	1.0	0.0	1.0	2.0	79.9694735	5.5	1.5	0.5	0.06877624372505091	0.3333333333333333
CG13151	241.0	144.0	111.37	120.0	0.0	0.0	0.0	1.0	191.63	174.0	223.0	309.0	192.5	115.685	266.0	182.815	0.6009610389610389	0.6872744360902255
CG1316	1394.4	941.274	648.394	598.026	1.02049	5.09641	77.5972	49.7258	875.6057	871.9742	901.979	1644.9069	1167.837	623.21	1273.44295	873.78995	0.5336446781528587	0.6861634044933068
ana3	1444.97	1886.93	1837.6	2211.11	4.01763	2.00931	4.03042	9.06655	2260.4	2470.89	2288.98	3035.99	1665.95	2024.355	2662.4849999999997	2365.645	1.2151355082685555	0.8885101700103476
mIF3	511.5884	321.4729	217.9076	236.61	0.0	1.019564	0.0	1.02579	297.175	243.391	360.0	583.98	416.53065	227.2588	471.99	270.283	0.5455992254111433	0.5726456068984512
CG1317	1258.958158156	1236.0	709.324000040568	765.375	10.4753	10.46881	1.04255	0.0	768.676	788.625	945.525	1581.53	1247.479079078	737.349500020284	1263.5275	778.6505	0.5910716358988979	0.6162513281270096
wash	915.0	843.818	616.963	648.0941	8.43713	6.22519	0.0	3.1824	778.037	760.906	921.563	1355.77	879.409	632.52855	1138.6665	769.4715	0.7192654953497178	0.6757654677642664
OSCP1	107.084	92.0932	66.0	68.0993	0.0	0.0	1.0	5.0	27.7821	35.1249	42.688	67.4421	99.5886	67.04965	55.06505	31.4535	0.6732663176307329	0.5712062369869817
Hexo1	1039.9732	677.000000034829	299.0665	352.345	0.0	1.01989	1.0264200218667	0.0	238.934000238684	240.6546	357.000238161	697.98	858.4866000174145	325.70575	527.4901190805	239.79430011934198	0.3793952637040497	0.4545948662267683
CG13185	5601.32	2790.49	881.682	1211.89	1.0221	7.19881	97.6801	45.5063	1649.32	2126.11	2916.98	7824.79	4195.905	1046.786	5370.885	1887.7150000000001	0.24947800295764563	0.35147187102311817
Zip48C	423.836	413.0	247.0	247.136	2.33334	0.0	1.16414	0.0	318.0	297.864	396.667	608.0	418.418	247.06799999999998	502.33349999999996	307.932	0.5904812890458823	0.6130031144647929
Fdx2	1223.98	756.0	456.398	487.493	0.0	1.02494	1.02221	0.0	694.602	553.507	784.0	1332.98	989.99	471.94550000000004	1058.49	624.0545	0.47671744159031915	0.5895705202694403
cuff	169.0	112.0	63.0	61.0	0.0	0.0	0.0	0.0	28.02390605	35.0427	32.0534	93.11022	140.5	62.0	62.581810000000004	31.533303025000002	0.4412811387900356	0.5038732984073168
CG13192	650.725	513.666	361.331	367.687	0.0	1.019	27.2752	26.3337	336.669	338.313	432.0	712.981	582.1955	364.509	572.4905	337.491	0.6260938121301178	0.5895137124546171
pyr	261.944	132.849	35.2222	26.4895	0.0	0.0	49.0559	27.1509	36.7778	25.5105	195.0	389.0	197.3965	30.85585	292.0	31.14415	0.1563140683852044	0.10665804794520548
CG13196	12.6077	17.0	7.25827	4.0	0.0	0.0	12.3923	4.0	31.7417	28.0	35.0	78.0	14.80385	5.629135	56.5	29.87085	0.38024804358325703	0.528687610619469
CG13197	1114.0035	828.0003	610.6057	578.2453	15.0	29.0161	1.0	2.0	421.394	384.755	389.99966	667.9843	971.0019	594.4255	528.99198	403.0745	0.6121774838957577	0.7619671284997553
mRpL23	723.9963	416.9879	175.49748	163.0165	0.0	1.00761	1.00359	2.01247	205.502	182.984	346.0	616.992	570.4921	169.25699	481.496	194.243	0.2966859488501243	0.4034156046986891
ix	414.0	265.996	215.099	208.14	0.0	0.0	0.0	1.0036	183.901	163.86	218.0	401.0	339.998	211.6195	309.5	173.8805	0.622413955376208	0.5618109854604201
CG13204	114.876	80.0	44.73996	39.9303331706	0.0	0.0	1.12397	0.0	75.2601	54.0697	116.0	185.0004	97.438	42.3351465853	150.5002	64.66489999999999	0.4344829182177385	0.42966653864911797
Fbl6	860.939	1060.999986284	642.885	611.838	46.6954000187465	66.8217	1.06098634	0.0	475.1153	447.1619	776.3047	1406.179	960.9694931419999	627.3615	1091.24185	461.1386	0.6528422644810187	0.42258148365552506
zfh1	868.676	890.38	743.937	923.614	8.28642	11.4038	2.067371802	3.114632294	763.2012	785.912	977.7136	1498.5949	879.528	833.7755	1238.15425	774.5566	0.9479806214242184	0.6255735906895283
CG13220	1117.00328	644.0	345.28128	317.919	2.48064	1.24807	0.0	0.0	396.718	349.081	655.519	1182.75	880.50164	331.60014	919.1345	372.8995	0.3766036597047111	0.40570721695247
Vhl	183.506	133.966	41.9767	86.1818	0.0	2.37286	1.2265	0.0	153.656	173.1	235.085	387.142	158.736	64.07925	311.1135	163.378	0.40368441941336564	0.5251395391071104
ND-B17	1837.4233	965.6393	443.34733	539.0873	2.37276	2.46754	113.58	58.3604	595.653	557.912	928.627	1652.53	1401.5313	491.217315	1290.5785	576.7825	0.3504861539660227	0.4469177969414491
CG13252	608.476	422.0	76.9932	71.6735	2.35667	2.22238	3.52382	0.0	61.0068	55.3265	176.643	403.778	515.238	74.33335	290.2105	58.166650000000004	0.1442699296247559	0.20042917123949686
LSm7	1431.018	838.154	374.000494	354.8484	1.0	0.0	0.0	0.0	395.0	329.399	574.0	1051.0	1134.586	364.424447	812.5	362.1995	0.3211959666345257	0.445784
Cyt-b5-r	45.0	28.0	2.0	10.2309	1.18272	1.03033	0.0	0.0	2.0	14.7691	24.8173	62.9697	36.5	6.11545	43.8935	8.38455	0.16754657534246575	0.19102031052433732
Cse1	6897.74	5817.72	4681.04	5539.1	7.74716	12.0735	3.25622	3.27783	4451.96	4496.9	4995.25	7487.93	6357.73	5110.07	6241.59	4474.43	0.8037570013196534	0.7168734248805193
CG13282	65.9766	46.0	35.0	19.6144	2.0	0.0	0.0	0.0	18.0783	11.4309	7.0281	13.0298	55.9883	27.3072	10.02895	14.7546	0.48773047225938276	1.4712008734713005
CG13284	21.99998	17.0	10.31419	11.44823	0.0	0.0	0.0	0.0	13.6858	37.5518	5.0	24.0	19.49999	10.88121	14.5	25.6188	0.5580110553902847	1.7668137931034482
CG13295	368.0	224.0	146.59	169.647	1.09147	1.09579	0.0	0.0	402.41	394.353	473.909	757.904	296.0	158.11849999999998	615.9065	398.3815	0.5341841216216215	0.6468213925327951
Sf3b6	2264.71	1264.0	774.35	787.759	169.044	252.793	1.28754	0.0	552.65	489.024	844.504	1466.21	1764.355	781.0545	1155.357	520.837	0.4426855706476304	0.45080178680702154
CG13299	1652.0	712.0	604.0	710.0	0.0	1.00348	0.0	0.0	498.0	599.0	534.0	899.997	1182.0	657.0	716.9984999999999	548.5	0.5558375634517766	0.764994626906472
CG13309	6.0	22.0	3.0	19.0	0.0	0.0	0.0	1.0	2.0	21.0	28.0	107.0	14.0	11.0	67.5	11.5	0.7857142857142857	0.17037037037037037
CG13315	53.0	21.0	7.0	15.0	4.0	1.01198	17.0	4.0	8.0	18.0	29.0	109.988	37.0	11.0	69.494	13.0	0.2972972972972973	0.18706650933893573
Mnt	4218.9725	4281.9363001345	2967.541756	3189.41709001343	2.0665	7.583416	38.03363	51.0682	3594.45800004584	3272.58880165718	4934.93800476696	8414.41000681339	4250.45440006725	3078.479423006715	6674.674005790175	3433.52340085151	0.7242706622044945	0.5144106510479736
CG13319	760.9999	487.0	202.8353	242.8643	0.0	1.03416	0.0	0.0	312.1362	286.1359	532.99965	897.9662	623.99995	222.8498	715.482925	299.13604999999995	0.3571311183598652	0.4180897119242922
Sans	80.7589	22.99998	5.0	1.9999972	0.0	0.0	2.2410571	0.0	4.9999986	10.0	32.000029	29.0	51.87944	3.4999986	30.5000145	7.4999993	0.067464078255278	0.24590149948945106
CG13321	183.66862	53.94584	6.0	17.0	7.0	2.00734	13.3317	3.05415	26.0	2.0	112.0	278.993	118.80723	11.5	195.4965	14.0	0.09679545596677912	0.07161253526277964
SCCRO3	657.06129	737.3667	633.1777	634.621	102.884	130.978	90.93829054	91.6331	789.823	802.3789	786.117	1288.0196	697.2139950000001	633.8993499999999	1037.0683	796.10095	0.9091890790287419	0.7676456314400895
cid	711.842	599.0	473.461	452.0	0.0	0.0	56.1579	42.0	508.539	466.0	501.0	725.0	655.421	462.7305	613.0	487.2695	0.7060049952625869	0.7948931484502447
Ero1L	1035.73	1081.32	816.973	856.687	2.17515	2.18179	61.2687	54.6805	1189.03	1275.31	1180.82	2122.82	1058.525	836.8299999999999	1651.8200000000002	1232.17	0.7905623391039417	0.7459468949401267
CG13339	385.0	293.994	175.883	147.154	0.0	0.0	0.0	1.00638	197.117	134.846	198.0	350.0	339.497	161.51850000000002	274.0	165.98149999999998	0.4757582541230114	0.6057718978102189
S-Lap7	98.0	56.0	59.0	82.0	75.79004	92.0	0.0	0.0	0.0	0.0	2.20996	0.0	77.0	70.5	1.10498	0.0	0.9155844155844156	0.0
Uba3	1400.55	893.0	687.337	698.349	0.0	2.00229	1.00354	0.0	864.663	863.651	1095.0	1769.0	1146.775	692.8430000000001	1432.0	864.1569999999999	0.6041664668308954	0.6034615921787709
CG13344	1642.86000200589	1354.0000119837	1035.9458	1045.1822	1.08292	2.23868	2.13866	0.0	1113.0547	964.818	1173.9162	2033.7593	1498.430006994795	1040.5639999999999	1603.83775	1038.93635	0.6944361732897508	0.6477814542025838
tum	2412.74	2800.89	2398.4	2194.88	1.04658	3.17358	5.2575	3.11171	2688.6	2586.12	2912.95	4535.83	2606.8149999999996	2296.6400000000003	3724.39	2637.3599999999997	0.8810138042016793	0.7081320699497098
PheRS-m	509.0	417.937	261.209	251.6	0.0	0.0	0.0	2.06271	365.791	299.4	433.0	723.0	463.4685	256.4045	578.0	332.5955	0.5532296153891796	0.575424740484429
Rpn13	4007.1869	2940.36101	2191.6614	2288.2214	3.53071123468	7.8339968968	4.808514086	3.6406318506	2822.341	2734.779	3308.471	5419.16	3473.773955	2239.9413999999997	4363.8155	2778.56	0.644814956015179	0.6367271943554901
Ctf4	1501.11	1434.02	1127.28	1021.57	2.39845	2.36871	19.6663	19.9834	889.716	963.432	1137.6	1567.04	1467.565	1074.425	1352.32	926.5740000000001	0.7321140801259228	0.6851736275437768
Hmt4-20	5851.363	6367.595	4519.821	5217.06000025602	2.05775	2.04533	20.2793	13.22301	3719.76735	3839.741	4153.951	7294.942	6109.479	4868.44050012801	5724.4465	3779.754175	0.7968667213895014	0.6602829068277606
CG13364	2489.8	1156.08	512.073	532.681	1.00584	4.04213	1.20056	5.92012	663.927	641.319	906.994	1766.96	1822.94	522.377	1336.977	652.623	0.2865574292077632	0.4881333037142748
CG13365	302.0	209.0	115.0	127.0	0.0	4.0	0.0	0.0	69.0	68.0	135.0	212.0	255.5	121.0	173.5	68.5	0.4735812133072407	0.39481268011527376
spdi	3684.99666	4829.8471	4851.53590003777	5288.83380001066	390.05781	601.0821	0.0	3.15159	4938.461	5388.165	4862.9489	7585.921	4257.42188	5070.184850024215	6224.434950000001	5163.313	1.190904963833233	0.8295231682034044
CG13367	914.997	670.999	394.436	356.789	0.0	0.0	1.00322	1.00146	520.564	450.211	685.0	1171.0	792.998	375.61249999999995	928.0	485.3875	0.47366134593025444	0.523046875
CG13369	1085.0	488.0	183.0	188.0	0.0	1.0007	0.0	0.0	316.0	305.0	691.0	1438.0	786.5	185.5	1064.5	310.5	0.2358550540368722	0.29168623767026775
CG13373	1098.0014	781.9998	524.99975	510.35102	1.0	5.00742	0.0	0.0	847.0	761.649	948.949	1540.99	940.0006000000001	517.675385	1244.9695	804.3245	0.550718143158632	0.6460596022633486
CG13375	224.0004	133.0	3.0	3.0	1.0	0.0	0.0	0.0	10.0	11.0	4.0	7.0	178.5002	3.0	5.5	10.5	0.016806703858034892	1.9090909090909092
CG13377	230.42317	133.6755	77.3056	87.5525	2.03573	0.0	0.0	0.0	109.2807	169.456000011698	119.9643	314.0001	182.04933499999999	82.42904999999999	216.98219999999998	139.36835000584898	0.4527841312905647	0.6423031474740739
Sgf11	494.0	354.0	203.077	205.671	1.03734	1.03154	0.0	0.0	203.923	153.329	225.963	332.968	424.0	204.374	279.4655	178.626	0.4820141509433962	0.6391701301233962
CG13384	1843.58100022	1185.015766431	271.0485064	259.78909379	3.19496549	3.2187321	27.418973	27.9836678	311.952	279.2115	807.805	1374.781	1514.2983833255	265.418800095	1091.293	295.58175	0.17527509968816227	0.27085461924524395
emb	6122.207	5666.21	5105.89	5650.479	614.225	1180.88	2.79269	2.78877	4627.11	4980.52	4662.78	7635.12	5894.208500000001	5378.1845	6148.95	4803.8150000000005	0.9124523674383083	0.7812415127786045
Akap200	11817.482	8378.496	5319.245	5751.22213843	65.20992	120.27669	9.12807	4.364743	6919.708	6586.929	8126.7958	14168.920988628	10097.989	5535.233569215	11147.858394314	6753.318499999999	0.5481520696066317	0.6057951456796895
RpS13	38336.4317	17950.8626	5943.9524	5711.6901	29.7727	34.1124	291.584	135.092	7490.05	7276.31	17091.2	36846.9	28143.64715	5827.82125	26969.050000000003	7383.18	0.20707413004927472	0.27376492683279535
CG13390	309.0	148.0	79.3668	73.7585	1.09388	0.0	0.0	0.0	54.6332	55.2415	152.906	236.0	228.5	76.56264999999999	194.453	54.93735	0.3350663019693654	0.28252251186662075
AlaRS	6685.012	4721.843	2249.932	2247.65	26.3118	21.8858	175.987	114.155	2941.07	3019.35	4688.69	8068.11	5703.4275	2248.791	6378.4	2980.21	0.39428764545529865	0.4672347297127807
CG13392	534.9997	300.9999	219.0714	277.0	0.0	0.0	0.0	0.0	211.929	201.0	233.0	394.0	417.9998	248.03570000000002	313.5	206.4645	0.5933871260225484	0.658578947368421
Dad1	1483.0	801.0	447.0	511.062	4.0	7.00524	0.0	0.0	355.0	314.938	474.0	927.995	1142.0	479.031	700.9975	334.969	0.41946672504378285	0.4778462120050357
fy	266.592	260.0485	231.001	188.439	0.0	0.0	0.0	0.0	244.48	236.59	240.12	391.833	263.32025	209.72	315.9765	240.535	0.7964446334833725	0.7612433203102129
Naglu	6233.0038	3938.0013	2264.1097	2320.1032	2.00405	6.01202	0.0	0.0	1066.89	1104.89	1432.0	2454.99	5085.50255	2292.10645	1943.495	1085.89	0.4507138532454379	0.5587305344238087
CG13398	513.653	841.8951	499.8020126314	557.489	1.01359	0.0	9.34675	10.1045	660.198	579.511	661.986	938.0	677.77405	528.6455063157	799.9929999999999	619.8544999999999	0.7799730696619324	0.7748249047179162
Chrac-14	677.0	554.0	386.0	383.458	0.0	1.0	1.0	1.0	486.0	480.542	557.0	985.0	615.5	384.72900000000004	771.0	483.27099999999996	0.6250674248578392	0.626810635538262
D12	765.74	857.648	792.367	810.113	0.0	3.14593	5.26001	6.35204	832.633	884.887	872.0	1408.85	811.694	801.24	1140.425	858.76	0.9871207622576982	0.7530175153999605
Aasdh	197.16630009866	183.0661	66.71133	66.0127	0.0	0.0	25.8336	22.9334	358.28829056	371.987	397.0001	649.0	190.11620004933002	66.362015	523.00005	365.13764528	0.34906028514551024	0.6981598668680816
CG13403	6.0	5.0	44.8836	42.4893	0.0	1.0	0.0	0.0	62.1164	48.5107	7.0	9.0	5.5	43.68645	8.0	55.31355	7.942990909090909	6.91419375
Rpt1	5007.85	3269.86	2136.32	2239.69	6.56893	5.42808	642.147	431.141	3081.68	2847.31	3438.43	5753.57	4138.8550000000005	2188.005	4596.0	2964.495	0.5286498318979524	0.645016318537859
mRpL35	868.997	477.994	234.447	301.0	2.0	1.00303	1.00334	1.00608	300.553	258.0	358.0	685.997	673.4955	267.7235	521.9984999999999	279.2765	0.39751342065388706	0.5350139895038013
Polr1H	646.993	359.0	125.474	114.0	0.0	0.0	1.00583	0.0	148.39	133.885	341.845	617.947	502.9965	119.737	479.896	141.1375	0.23804738203943762	0.2941001800390084
HnRNP-K	3652.12822	1767.4232	1209.4643	1289.466	5.0384	2.57103	273.868600165764	170.577	1063.53425	1046.5353	1665.96080017646	3357.4336	2709.77571	1249.46515	2511.6972000882297	1055.034775	0.4610954129484023	0.42004855321053003
Mgat1	638.803	854.992	793.956	849.043	137.676	155.211	61.4914	77.9975	728.613	694.925	663.852	1031.79	746.8975	821.4995	847.8209999999999	711.769	1.0998825139995783	0.8395274474210949
qsm	297.0	146.0	121.10721	108.8615	4.29853	9.87726	0.0	0.0	61.8932	52.1384	76.7015	180.123	221.5	114.984355	128.41225	57.0158	0.5191167268623025	0.44400592622588575
Nnf1a	175.0	109.0	6.8055	13.0	1.02017	0.0	0.0	0.0	20.1945	10.0	53.9798	92.0	142.0	9.902750000000001	72.9899	15.09725	0.06973767605633803	0.20684026146083226
CG1344	1871.101	1668.618	1178.292	1356.872	3.08665	5.13238	1.04059	0.0	1408.13	1495.34	1444.91	2708.87	1769.8595	1267.5819999999999	2076.89	1451.7350000000001	0.716204873889707	0.6989946506555476
Gfat2	1465.29	1093.44	434.134	472.896	2.36142	1.18686	8.1536	4.55808	365.141	330.104	596.639	971.813	1279.365	453.515	784.226	347.6225	0.35448445127074757	0.4432682670556702
Atg17	2868.6256	3237.26000005861	1752.18000001174	2230.37	1.040189	3.1020254	17.3729	34.7409	2030.82	2020.63	2396.9600127348	4059.8932	3052.9428000293046	1991.27500000587	3228.4266063674	2025.725	0.6522477263533257	0.6274650927497248
Tdrd3	1862.0	1540.97	1117.06	1240.77	1.04393	2.09897	0.0	1.03296	1449.94	1358.23	1402.96	2569.9	1701.4850000000001	1178.915	1986.43	1404.085	0.6928741658022256	0.7068383985340535
shd	75.5802	51.90975	9.0	4.0	5.33341	4.14892	3.41979	1.09023	4.0	6.0	35.6665949	72.85107	63.744975000000004	6.5	54.25883245	5.0	0.10196882185615415	0.09215089551747256
CG13484	254.0	194.0	152.475	144.0	0.0	0.0	2.0	0.0	187.525	175.0	191.0	350.0	224.0	148.2375	270.5	181.2625	0.6617745535714287	0.6701016635859519
dj-1beta	1056.0	674.0	338.53	366.044	0.0	0.0	0.0	0.0	309.47	345.956	476.0	711.0	865.0	352.287	593.5	327.713	0.40726820809248554	0.5521701769165965
Vrp1	1359.61426	1291.6555	842.83269	944.65949	7.32554	7.64014	22.38634	23.3447	876.16771	850.34	1090.67472	1849.36014	1325.63488	893.74609	1470.0174299999999	863.253855	0.6742023037293647	0.5872405574129826
CG13506	292.692130682	137.8814	207.615	202.1472	0.0	1.034652	0.0	0.0	224.2572	217.2568	121.0	277.9653	215.28676534100003	204.8811	199.48265	220.757	0.9516660240376683	1.106647620732931
CG13516	54.0	34.99997	1.0	5.50441	0.0	1.09511	0.0	0.0	3.0	5.49559	29.0	69.9049	44.499984999999995	3.252205	49.45245	4.247795	0.07308328306178082	0.08589655315358491
robo1	105.8663	56.122	34.3446	45.07684	1.09518	2.19879	1.13368	5.87801	54.6554	57.9231	79.9048	135.801	80.99414999999999	39.710719999999995	107.85289999999999	56.289249999999996	0.49029121239003065	0.5219076167632025
CG13531	955.5842	1015.64000005519	748.76900024928	832.227000784588	2.07739	1.02877	43.4158	44.3649	976.231	1127.77	990.923	1468.97	985.612100027595	790.498000516934	1229.9465	1052.0005	0.8020376378240504	0.8553221623867381
asrij	1217.7881	647.1214	218.8405	248.8344	1.1417	1.13466	93.2069	48.87819	502.159	547.166	977.858	1692.865	932.45475	233.83745	1335.3615	524.6625	0.2507761904800206	0.3928992261646004
CG1354	4492.8382	2801.4369	1344.1181	1579.9707	7.76629	5.53852	102.163	74.5574	2115.8806	2047.034	3102.229	5639.461	3647.1375500000004	1462.0444	4370.845	2081.4573	0.4008744885423912	0.47621393574926585
CG13540	4.0	3.0	0.0	1.0	1.0	0.0	0.0	0.0	47.0	43.0	0.0	5.0	3.5	0.5	2.5	45.0	0.14285714285714285	18.0
Ice1	1903.58	2006.57	1501.43	1724.3	1.00325	4.0151	50.4159	54.4257	1518.57	1639.7	1530.0	2370.98	1955.0749999999998	1612.865	1950.49	1579.135	0.8249632367044744	0.8096093802070249
CG13551	4069.0041	2372.9956	1246.978	1252.18	4.2177	5.24598	0.0	0.0	1277.0239	1109.8227	1880.7838	3394.756	3220.99985	1249.5790000000002	2637.7699	1193.4233	0.38794754988889557	0.4524364691552512
CG13562	22.0026	15.0	7.0	8.0	0.0	1.03526	0.0	0.0	66.00440499276	46.00336	85.00003	191.97111	18.5013	7.5	138.48557	56.00388249638	0.4053769194597136	0.4044022961842162
CG13563	81.8962	34.0	2.0	1.11207	0.0	0.0	1.10382	1.0	4.0	7.88793	20.0	45.0	57.9481	1.556035	32.5	5.943965	0.026852217760375236	0.18289123076923078
Not11	414.93763	281.97987	203.5057	198.5257	0.0	1.00838	3.06275	2.01984	214.494	205.474	241.0	520.99112	348.45875	201.01569999999998	380.99556	209.98399999999998	0.5768708634809715	0.5511455304098556
ppk29	140.000259233	60.999995945	7.99999921018	5.00000021611	0.99999950176	7.09852828083	0.0	0.0	5.0	2.0	34.18231	57.5774	100.500127589	6.499999713145	45.879855	3.5	0.06467653195155189	0.07628620447906821
spag	1305.0	860.998	715.878	792.521	2.00488	1.0	1.0	2.00226	829.122	790.479	840.995	1362.0	1082.999	754.1995	1101.4975	809.8005	0.6963990733140104	0.7351814234712291
HisT	720.353	480.0206380124	157.8649	130.73762	7.24961	4.72711	7.64664	7.97932	150.6709	92.5351	401.421	743.213	600.1868190062	144.30126	572.317	121.603	0.2404272393701291	0.21247490464200783
CG13585	633.9997	371.99959	151.9142	141.8008	1.073626254	3.41876	0.0	0.0	264.0859	239.1991	469.9268	949.581	502.999645	146.85750000000002	709.7539	251.64249999999998	0.29196342673363124	0.35454894999520253
ITP	67.09095	39.9073	23.32767	32.94333	1.18306	3.11433	1.18228	2.51116	10.68187	14.07536	21.846	20.91192	53.49912500000001	28.1355	21.37896	12.378615	0.5259057975247258	0.5790092221511243
Bet5	235.724	129.0	123.316	107.674	26.1187	52.2415	9.27625	6.0	141.684	112.326	102.881	201.758	182.362	115.495	152.3195	127.005	0.6333282153080138	0.8338065710562337
tbrd-1	7.0	17.0	4.23043	2.0	3.0	0.0	0.0	0.0	25.7696	40.0	7.0	9.0	12.0	3.115215	8.0	32.8848	0.25960125	4.1106
sba	741.7735	731.77339756	426.83583785	415.8092	51.88426	74.80479	1.22616	5.22649	589.16446997	550.191590133	807.115580007593	1386.273819888	736.7734487800001	421.322518925	1096.6946999477964	569.6780300515	0.5718481300088306	0.5194499709706056
CG13599	491.0	300.0	207.056	220.563	0.0	1.0	0.0	0.0	192.944	178.437	182.0	266.0	395.5	213.8095	224.0	185.6905	0.5406055625790139	0.8289754464285713
CG1360	506.992	319.0	163.93	145.826	0.0	2.01236	1.00756	0.0	16.0695	18.1735	92.0	210.988	412.996	154.878	151.494	17.1215	0.37501089598930737	0.11301767726774659
CG13601	1061.834	666.816	398.228	435.996	1.149846	0.0	1.1663	1.18433	436.772	363.004	575.356	1052.0	864.325	417.11199999999997	813.678	399.88800000000003	0.48258698984756887	0.4914573086650985
CG13603	1381.95	837.0	362.177	353.915	1.06115	1.06494	1.04534	0.0	496.823	366.085	845.939	1182.94	1109.475	358.04600000000005	1014.4395	431.45399999999995	0.3227166001937854	0.4253126973072322
Epp	303.9204	266.1726	227.1129	244.1742	3.33334	4.21936	27.9516	23.2586	218.7276	200.3427	264.017	417.299	285.0465	235.64355	340.658	209.53515	0.826684593566313	0.6150894739005102
CG13605	1122.0	1105.0	798.573	889.985	1.07379	4.22906	0.0	0.0	893.195	844.015	996.926	1658.77	1113.5	844.279	1327.848	868.605	0.7582209250112258	0.654144902127352
mRpS24	604.284	287.105	133.343	142.996	0.0	0.0	0.0	0.0	213.182	202.774	352.412	579.124	445.6945	138.1695	465.76800000000003	207.978	0.3100094347136884	0.4465270263307054
CG13609	173.509	195.482	51.9585	36.4605	0.0	0.0	0.0	0.0	315.0	322.0	279.0	459.0	184.4955	44.209500000000006	369.0	318.5	0.23962373066009743	0.8631436314363143
Orct2	280.3857	124.9321	7.57151	16.71719	0.0	1.0	0.0	0.0	12.0	6.28277	35.0	58.0	202.6589	12.14435	46.5	9.141385	0.059925076076106205	0.19658892473118278
Cdc2rk	379.246	205.616	126.53	128.356	0.0	0.0	13.7535	14.3842	200.47	181.644	219.0	440.0	292.431	127.443	329.5	191.05700000000002	0.43580536947177284	0.5798391502276177
CG13623	176.0002	108.0	62.255	55.3267	0.0	0.0	0.0	0.0	51.745	52.6733	67.0	130.0	142.0001	58.790850000000006	98.5	52.209149999999994	0.4140197788593107	0.5300421319796954
REPTOR	1140.9550241018	1307.5469	981.35648	1010.73010661592	48.27107	80.84339	0.0	3.45298	1140.23	1077.97	1183.12	1883.17	1224.2509620509	996.0432933079601	1533.145	1109.1	0.8135940458150509	0.7234149411829931
CG13625	1225.0	995.0	808.0	868.088	0.0	1.00391	2.04716	0.0	999.413	1038.22	993.61	1672.99	1110.0	838.044	1333.3	1018.8165	0.7549945945945946	0.7641314782869573
Syx18	1111.9	804.0	717.993	679.386	3.50985	4.67846	1.10273	0.0	846.435	812.876	839.752	1359.98	957.95	698.6895	1099.866	829.6555	0.7293590479670128	0.7543241631253261
Polr2L	631.984	317.0	159.649	145.551	0.0	2.06398	1.01574	0.0	152.351	142.449	301.0	589.936	474.492	152.6	445.468	147.4	0.32160710823364774	0.33088796501656687
blow	337.3208	190.551	118.9474	134.913	5.166175847	16.00028692	15.6137	6.22053	155.9138	167.4998	332.8336	611.7844	263.9359	126.93020000000001	472.30899999999997	161.7068	0.4809129792498861	0.3423750129682051
CG13630	2014.87	1087.96	533.916	599.872	0.0	4.22349	3.13104	1.04132	700.084	704.128	1219.0	2131.78	1551.415	566.894	1675.39	702.106	0.3654044855825166	0.4190701866431099
CG13631	57.0	43.1127	54.2578	49.3862	0.0	1.25626	0.0	3.88731	76.7422	51.6138	52.0	98.7437	50.056349999999995	51.822	75.37185	64.178	1.035273247050574	0.8514850040167516
sosie	774.0	393.0	4.0	9.0	0.0	1.02696	0.0	0.0	10.0	2.0	262.533	753.98	583.5	6.5	508.2565	6.0	0.011139674378748929	0.011805062994767405
Nmnat	443.9996	306.9998	170.154	204.37522	0.0	0.0	0.0	0.0	238.8454	201.6248	259.0002	499.0	375.49969999999996	187.26461	379.0001	220.2351	0.49870774863468603	0.581095097336386
tnc	105.95146	54.851303752	167.87992	165.8475	0.0	1.06921354	1.0485628	2.1487181871	79.11974	92.1529432278	24.000025523	45.93076361	80.401381876	166.86371	34.9653945665	85.63634161389999	2.0753836079253905	2.4491741813761
Nepl16	19.0	8.0	22.1853	10.7389	0.0	0.0	0.0	0.0	18.8147	14.2611	13.0	22.0	13.5	16.4621	17.5	16.5379	1.2194148148148147	0.9450228571428572
Saysd1	342.0	209.0	129.0	163.0	1.0	0.0	0.0	0.0	165.0	128.0	179.0	299.0	275.5	146.0	239.0	146.5	0.52994555353902	0.6129707112970711
CG13667	435.852	335.0	146.9185	161.300000032659	1.02415	0.0	1.14799	0.0	230.081	197.7	269.976	411.0	385.426	154.1092500163295	340.488	213.89049999999997	0.3998413444249467	0.6281880712389276
CG13671	521.0	615.0	402.013	433.782	0.0	1.02211	0.0	0.0	499.987	490.218	545.0	839.978	568.0	417.8975	692.489	495.1025	0.7357350352112676	0.7149608152620475
CG13676	81.9359	53.4642	18.0376	28.8867	1.08946	0.0	0.0	0.0	7.52364	0.0	70.3523	154.5563	67.70005	23.46215	112.45429999999999	3.76182	0.34656030534689414	0.03345198894128549
Ipk2	1158.76	787.114	629.408	599.476	0.0	1.06918	50.243	22.8857	758.592	794.524	854.0	1542.93	972.937	614.442	1198.4650000000001	776.558	0.6315331825184981	0.647960516160255
CG13689	140.9996	102.00001	61.3361	70.13272	2.15861	0.0	0.0	0.0	83.6639	55.86727	81.84139	129.0	121.499805	65.73441	105.420695	69.765585	0.5410248189287218	0.6617826319585542
CG13690	1031.38	849.436	611.287	600.661	0.0	1.1058	1.13043	0.0	693.53	618.722	734.0	1154.89	940.4080000000001	605.9739999999999	944.445	656.126	0.6443735059676224	0.6947212383992715
CG13694	18.0	6.0	0.0	1.0	1.0	0.0	1.00035	0.0	80.1813	86.4667	326.291	859.237	12.0	0.5	592.764	83.324	0.041666666666666664	0.1405685905351877
geko	57.9242	27.7131	17.9011	15.76	2.34946	3.34716	16.0758	11.2869	22.0989	11.24	31.6505	35.6528	42.81865	16.83055	33.651650000000004	16.66945	0.39306587199736565	0.49535312532966436
CG13698	907.6974	722.4906	342.7859	389.755	1.30263	4.88681	19.3028	25.5098	281.2145	305.245	445.6976	835.1135	815.094	366.27045	640.4055500000001	293.22974999999997	0.44935976709434733	0.45788133784911755
CG13708	15.0	7.0	7.35106	10.0	0.0	0.0	2.05153	9.08056	15.8477	9.11857	26.1929	24.1159	11.0	8.67553	25.154400000000003	12.483135	0.7886845454545455	0.49626049518175747
CG1371	3706.01	2671.21	1670.48	1848.48	1.08528	6.45157	152.993	121.787	2294.5	2467.49	2980.91	4502.51	3188.61	1759.48	3741.71	2380.995	0.5518015687086222	0.6363387328253659
yl	69649.28	31617.8	12089.5	13559.34	13.58070922869	41.7769	1642.73754	837.20014	16555.513	17072.709	36202.47	74709.27	50633.54	12824.42	55455.87	16814.110999999997	0.2532791505393461	0.30319803836816545
CG13737	124.0	23.0	2.36427	6.61327	0.0	1.29119	0.0	0.0	4.63573	6.38673	3.0	7.70881	73.5	4.48877	5.354405	5.511229999999999	0.0610717006802721	1.0292889686155604
tsh	152.881	98.9018	28.4258	24.438	0.0	1.06495	3.11921	1.09821	38.5742	31.562	36.0	64.935	125.8914	26.4319	50.4675	35.0681	0.2099579478820634	0.6948650121365235
Boot	3048.99	2984.33	1576.8	1515.16	2.25929	3.41913	1.1408	2.27553	1576.23	1727.14	2000.74	3513.96	3016.66	1545.98	2757.35	1651.685	0.5124806905650621	0.5990117322791811
CG13742	425.5004	328.2597	116.0	97.5968	1.33393	3.48811	0.0	0.0	447.274	438.905	439.977	742.954	376.88005	106.7984	591.4655	443.0895	0.28337504200607067	0.7491383690172968
FANCI	781.0	922.939	683.948	726.7	1.02039	2.05616	0.0	5.06096	493.931	565.188	590.005	705.494	851.9694999999999	705.3240000000001	647.7495	529.5595	0.8278747067823439	0.8175374894152754
MrgBP	805.282	441.742	248.355	245.92	0.0	0.0	18.7184	5.25775	276.645	239.202	426.0	805.0	623.5120000000001	247.1375	615.5	257.9235	0.39636366260793693	0.41904711616571894
CG13751	311.0	189.0	75.7655	77.4448	2.0	1.00263	0.0	0.0	118.235	93.5552	165.0	367.997	250.0	76.60515000000001	266.49850000000004	105.8951	0.30642060000000004	0.3973572083895406
Pdfr	29.99996	23.92948	9.26939	8.0	3.22227	6.5063	0.0	2.07051	11.73061	7.0	8.8843000146119	12.1657	26.96472	8.634695	10.52500000730595	9.365305	0.3202219418558769	0.8898152012825704
CG13760	566.976	468.6583	263.132	284.0094	0.0	0.0	75.024	65.335	491.868	488.99	477.0	929.0	517.81715	273.5707	703.0	490.429	0.5283152556843665	0.6976230440967283
Smyd3	919.415	753.926	438.062	466.054	0.0	0.0	3.05891	0.0	420.677	362.806	638.861	1080.6	836.6705	452.058	859.7304999999999	391.7415	0.5403058910287861	0.45565616201821385
CG13766	477.2180134677	434.2965	256.0	256.4502	0.0	1.00384	14.0	11.024	191.0	184.0	306.0	542.996	455.75725673385	256.2251	424.498	187.5	0.5621964241144899	0.4416981941022102
Nlg2	789.5661	885.739	461.751	415.314	0.0	0.0	69.4340822	97.2607	63.2485	52.6864	9.0	14.0	837.65255	438.5325	11.5	57.96745	0.5235255357367443	5.040647826086956
Polr1F	2334.55	1579.34	747.489	610.491	0.0	0.0	7.4522	10.6613	470.511	428.509	723.0	1141.0	1956.9450000000002	678.99	932.0	449.51	0.3469642733955221	0.4823068669527897
CG13775	114.1032	92.7808	35.28066	25.247588	0.0	0.0	20.4272	16.4518	75.118	82.2587	80.7836	190.3195	103.44200000000001	30.264124	135.55155000000002	78.68835	0.29257094797084354	0.5805049813152264
Mnn1	1674.2737	1849.7257	1367.598	1506.5566	1.03239	2.151378	149.724	200.277	1781.4	1687.44	1975.97	3409.85	1761.9996999999998	1437.0773	2692.91	1734.42	0.8155945202487833	0.6440690554084615
Sem1	2136.94	1332.98	895.341	766.171	1.00183	0.0	8.06254	4.02311	1183.66	1054.83	1282.0	2689.0	1734.96	830.7560000000001	1985.5	1119.245	0.47883294139346155	0.5637093930999748
CG13784	1782.314452	1662.2606317	1536.057211	1639.817272	320.4932	489.0624781627	37.6809	37.7346	1168.94	1189.18	1422.51	2184.94	1722.28754185	1587.9372415	1803.725	1179.06	0.9219931067923262	0.6536805776933845
yellow-g2	5721.05	1789.05	276.932	488.768	1.02037	0.0	310.947	84.9465	359.068	531.232	250.98	943.0	3755.05	382.85	596.99	445.15	0.1019560325428423	0.7456573811956648
CG13807	319.933	215.0	88.4808	103.875	0.0	0.0	1.06654	0.0	123.519	123.125	130.0	241.0	267.4665	96.1779	185.5	123.322	0.3595885839908923	0.6648086253369272
Oseg2	12.0	7.0	0.0	0.0	0.0	0.0	0.0	0.0	5.0	4.0000000134056	29.0	71.0000000743892	9.5	0.0	50.0000000371946	4.5000000067028	0.0	0.09000000006710572
RpLP0-like	2047.88	1023.37	393.228	382.441	0.0	6.12197	7.12254	4.62587	460.772	433.559	1080.0	2181.88	1535.625	387.8345	1630.94	447.1655	0.25255807895807897	0.2741765484935068
GILT3	791.0	522.0	106.488	92.0	0.0	1.0	0.0	1.0	347.512	233.0	745.0	1263.0	656.5	99.244	1004.0	290.256	0.15117136329017516	0.28909960159362547
Pex11c	173.9998	127.0	86.0123	90.5129	0.0	0.0	0.0	0.0	235.988	193.487	302.0	430.0	150.4999	88.26259999999999	366.0	214.7375	0.5864628481480718	0.586714480874317
pinta	361.9996	240.0002	63.8218	40.47424	2.02032	2.0364	0.0	0.0	35.1782	14.5258	83.9797	142.964	300.9999	52.14802	113.47184999999999	24.851999999999997	0.17324929343830348	0.2190146719208332
Nop56	6901.48	4316.41	1596.3	1716.73	4.58833	3.46715	1018.52	724.593	2043.7	1664.27	4739.41	8518.53	5608.945	1656.5149999999999	6628.97	1853.9850000000001	0.295334505865185	0.2796791960138604
Def	139.0	98.0	39.0	15.0	0.0	0.0	0.0	0.0	76.0	19.0	18.0	347.0	118.5	27.0	182.5	47.5	0.22784810126582278	0.2602739726027397
CG13850	1575.812	1158.3148279	750.368671	857.044	0.0	2.092047	150.851	90.6897	1059.51	987.835	1171.84	1992.56	1367.0634139499998	803.7063355	1582.1999999999998	1023.6725	0.5879071353228355	0.6469931108582987
mats	2021.808565	1513.211	907.61452	1060.61068414631	1.14646	4.49413	72.1882	68.7871	1315.39	1196.39	1442.85	2232.51	1767.5097825	984.1126020731549	1837.68	1255.89	0.5567791543881624	0.6834106046754604
Coa7	1562.9951	1133.9999	700.0004	697.3613	4.0	1.00017	0.0	1.0	1373.0	1343.64	1593.0	2870.0	1348.4975	698.68085	2231.5	1358.3200000000002	0.5181180165332157	0.608702666367914
MED8	498.975	357.65	264.481	276.164	0.0	0.0	3.14738	2.09112	322.393	271.589	418.266	696.55	428.3125	270.3225	557.408	296.991	0.6311338100102145	0.5328072076468224
CG13868	672.72	349.483	126.569	132.844	5.03871	0.0	19.2797	13.5174	125.431	127.156	342.961	741.0	511.1015	129.7065	541.9805	126.2935	0.25377835909305685	0.23302222127917885
CG13876	283.0	242.0	212.675	180.22	23.2504	47.176	0.0	0.0	125.325	104.78	147.75	200.824	262.5	196.4475	174.287	115.05250000000001	0.7483714285714286	0.6601324252526006
wac	722.99970418557	484.0	267.99960959407	300.9998	0.0	0.0	0.0	1.00577	444.038	432.853	517.202	947.966	603.499852092785	284.499704797035	732.5840000000001	438.44550000000004	0.47141636209265325	0.5984917770521879
mRpL17	1069.9918	650.9996	260.9446	280.12407	0.0	0.0	0.0	0.0	355.766	284.385	472.28	758.911	860.4956999999999	270.534335	615.5954999999999	320.07550000000003	0.3143935931347478	0.5199445090160667
CG13887	3363.0049	2146.9983	1357.0211	1354.5948	26.475	33.9676	0.0	0.0	1369.98	1161.4	1431.52	2242.0337	2755.0016	1355.80795	1836.77685	1265.69	0.49212601183244314	0.6890820733068365
tor	1472.96	1981.864	1521.85	1681.927	0.0	2.02087918	4.039906	8.135141	2211.147	2330.076	2652.0	3200.98	1727.412	1601.8885	2926.49	2270.6115	0.9273343591453573	0.7758822001783707
Dci	1219.0	775.0	117.0	120.0	0.0	2.00615	0.0	0.0	477.0	478.0	641.0	994.994	997.0	118.5	817.9970000000001	477.5	0.11885656970912738	0.5837429721624895
Cypl	517.0	346.0	211.387	191.446	0.0	0.0	0.0	0.0	254.613	246.554	300.0	523.0	431.5	201.41649999999998	411.5	250.58350000000002	0.4667821552723059	0.608951397326853
CG13893	322.457	149.418	80.7411	71.6296	0.0	0.0	0.0	0.0	109.953	104.4111	170.2248	308.4889	235.9375	76.18535	239.35685	107.18205	0.32290479470198674	0.4477918639052945
CG13895	372.0	262.985	63.000014	57.3292	0.0	0.0	8.0	5.01537	157.8307	137.4082	307.523	561.579	317.4925	60.164607000000004	434.551	147.61945	0.18949930155830452	0.33970569622437874
CG13896	128.0002	75.0	76.0	74.6342	0.0	0.0	0.0	0.0	49.0	45.3657708	76.0	138.0	101.5001	75.31710000000001	107.0	47.1828854	0.7420396630151104	0.44096154579439256
hng3	179.0	105.6006	63.9042	95.8804	0.0	0.0	0.0	2.39943	622.096	486.12	915.0	1560.0	142.3003	79.8923	1237.5	554.108	0.5614345155983509	0.4477640404040404
Sf3b3	10032.54	5376.51	1946.024	2022.646	8.65802	5.38998	624.2836116434	287.35286686899	2937.97450233558	2728.34923233742	9489.34700006378	17533.4820081548	7704.525000000001	1984.335	13511.414504109289	2833.1618673365	0.2575544890827144	0.20968654810159496
CG13901	824.0	439.0	214.257	221.571	2.6095544425	0.0	0.0	0.0	244.453	214.419	400.071	711.182	631.5	217.914	555.6265000000001	229.436	0.3450736342042755	0.41293206857484294
JMJD5	348.315000257327	243.7331	132.94200360712	144.739000045575	0.0	0.0	5.68511	8.26655	272.0585	245.2608	300.0	411.0	296.0240501286635	138.84050182634752	355.5	258.65965	0.4690176415260925	0.7275939521800281
mat	1.0	7.0	0.0	0.0	0.0	0.0	0.0	1.0	0.0	2.0	17.0	81.0	4.0	0.0	49.0	1.0	0.0	0.02040816326530612
CG13907	3856.67	3128.29	1578.735	1919.686	7.52637	6.35225	374.329	270.711	2869.26	2656.32	3825.47	6420.65	3492.48	1749.2105	5123.0599999999995	2762.79	0.5008505417353857	0.5392851147556343
sol	3181.7332	2343.37412	1237.61297	1322.16958	12.1607	14.46444	152.265	100.6296924465	2949.388	2742.827	4674.835	8334.534	2762.55366	1279.891275	6504.684499999999	2846.1075	0.4633000594819215	0.4375473552944805
CG13912	101.0	41.0	27.2193	23.7275	0.0	0.0	0.0	0.0	22.7807	9.27254	32.0	77.0	71.0	25.473399999999998	54.5	16.02662	0.3587802816901408	0.29406642201834865
msd1	573.0	456.0	251.0	222.0	0.0	0.0	0.0	0.0	155.0	149.0	181.0	258.0	514.5	236.5	219.5	152.0	0.45966958211856174	0.6924829157175398
CG13917	3660.7504	3283.5587	2468.50724	3229.509	226.549	405.812	293.066	282.02084719	3804.85	4082.3807	3324.6913	5781.816	3472.15455	2849.00812	4553.25365	3943.61535	0.8205303303679267	0.8661093040577699
CG13919	82.7718	50.0	19.1774	25.3227	0.0	0.0	1.22822	0.0	38.8226	30.6773	65.0	77.0	66.38589999999999	22.25005	71.0	34.74995	0.3351622859673516	0.48943591549295773
CG13920	42.0	25.9224	33.9211	29.5613	4.31738	16.3031	0.0	0.0	16.0789	22.4387	25.6826	36.6108	33.9612	31.7412	31.1467	19.2588	0.9346312851136003	0.6183255368947593
CG13921	564.33818	738.382673	202.666744	178.75253743903	0.0	0.0	22.662069	30.61711	132.3335	136.2475	327.99956	555.9993	651.3604264999999	190.709640719515	441.99942999999996	134.2905	0.2927866553764531	0.3038250524440722
mRpL46	828.0	566.0	293.0	267.0	0.0	0.0	1.0	0.0	363.0	307.0	513.0	856.0	697.0	280.0	684.5	335.0	0.4017216642754663	0.48940832724616506
CG13926	354.016	233.049	108.414	97.9028	0.0	0.0	20.9844	7.48636	241.586	196.557	366.0	642.0	293.5325	103.1584	504.0	219.07150000000001	0.35143774539446226	0.4346656746031746
Mettl2	515.868	328.035	153.6202	171.9667	1.4238	1.37369	68.1316	43.9647	245.3797	225.0333	397.576	671.626	421.9515	162.79345	534.601	235.2065	0.3858108100101552	0.4399664422625472
CG13933	985.529	1055.5309	504.945	625.1028	2.066636	1.890979	44.4708	47.4663	676.826	758.042	864.933	1188.97	1020.52995	565.0239	1026.9515000000001	717.434	0.5536573424425222	0.6986055329779448
CG13937	20.8763	15.28583	12.416	16.5069	0.0	0.0	13.12373	1.71416978799	35.583928322	42.4930959	18.999976598	36.99996132	18.081065000000002	14.461450000000001	27.999968959	39.038512111	0.7998118473662917	1.3942341210507627
Arc2	50.0	13.0	9.0	15.0	1.0	0.0	0.0	0.0	114.0	93.0	143.0	238.0	31.5	12.0	190.5	103.5	0.38095238095238093	0.5433070866141733
stg	6286.543	7272.48	4654.612	5321.103	3.36222	11.2083	18.4529	6.52108	4773.39	4389.89	4845.64	7627.79	6779.5115	4987.8575	6236.715	4581.64	0.7357252067497784	0.7346239165971189
l(2)k10201	277.009	203.762	93.0	106.0	1.0	2.0	27.8916	15.9148	176.146	150.159	246.151	402.719	240.3855	99.5	324.435	163.15249999999997	0.41391847678000543	0.5028819332069597
kat80	2401.6559	2099.436	1019.962	1076.887	1.106657	2.22771	188.3421	198.5602	1391.041	1234.113	2208.894	3144.77	2250.54595	1048.4245	2676.832	1312.577	0.46585340770313977	0.4903471715819297
SWIP	455.208	386.314	258.799	341.163	0.0	1.00442	1442.95	650.759	588.258	662.033	758.0	1640.2	420.761	299.981	1199.1	625.1455000000001	0.7129486810802331	0.5213455925277293
bwa	547.563	344.898	79.0	79.3301	6.0	18.0	32.247	20.1244	130.0	141.67	173.0	272.0	446.2305	79.16505000000001	222.5	135.83499999999998	0.17740842456981315	0.6104943820224719
LRR	1750.38406	1930.58357	1294.6036	1288.8433	4.61275	10.5057	64.617840700859	88.4179300116095	1399.7563	1517.5545	1780.425	2850.27797001268	1840.483815	1291.72345	2315.3514850063398	1458.6554	0.7018390705054909	0.6299930742463519
CG13992	959.714	439.7395	62.0395	45.025369	1.0415327	0.0	6.285898	6.260498	40.9605	43.9747	204.9581	392.0001	699.72675	53.532434499999994	298.4791	42.467600000000004	0.07650477061224255	0.14227997873217924
Pfdn1	1358.0	685.969	478.828	469.446	2.06782	1.01865	0.0	1.03128	473.172	444.554	578.932	1097.98	1021.9845	474.137	838.456	458.863	0.46393756461081354	0.5472714131689677
CG13994	393.0	231.708	133.1047	136.0	0.0	3.0	0.0	1.0	264.659	245.0	293.0	564.0	312.354	134.55235	428.5	254.8295	0.4307687751717602	0.5947012835472578
Vm26Ac	595.852	477.0	104.874	46.8831	0.0	1.11417	2.14779	0.0	131.126	75.1169	822.0	330.886	536.4259999999999	75.87854999999999	576.443	103.12145000000001	0.14145203625476765	0.17889270925312653
bchs	180.642	160.65	95.582	94.9334	4.1296	8.28482	8.35837	8.35032	234.418	267.067	278.87	479.715	170.64600000000002	95.2577	379.2925	250.7425	0.5582181826705577	0.661079509876942
CG14005	1298.9966	882.9998	682.9998	605.029	0.0	2.0	2.0	0.0	533.0	542.971	586.0	967.0	1090.9982	644.0144	776.5	537.9855	0.5902983157992379	0.6928338699291694
Cul5	2162.79	1984.95	1476.9	1664.44	1.06512	3.18948	3.21277	1.0544	1792.1	1913.56	1959.93	3170.81	2073.87	1570.67	2565.37	1852.83	0.7573618404239418	0.722246693459423
CG14015	2.0	6.0	0.0	1.16556	0.0	0.0	0.0	0.0	5.0	5.83444	22.0	61.0	4.0	0.58278	41.5	5.41722	0.145695	0.130535421686747
tomb	18.0	10.0	11.0	10.0	0.0	1.0	0.0	0.0	15.1945	12.7757	35.9989	45.5842	14.0	10.5	40.79155	13.9851	0.75	0.34284306431111344
Ncoa6	3547.172	3387.887	2809.5258	3189.244	474.0050163344	855.361	3.34719	1.11162265	2214.4671	2369.754	2833.995	4771.642	3467.5295	2999.3849	3802.8185	2292.11055	0.8649918912009256	0.6027399282926598
Nin	2079.842882	2436.4251779	1329.83650005893	1312.04188397128	1.00378	4.16922	20.155	29.5767	1035.164	1029.9582	1975.99300647239	3161.830349	2258.13402995	1320.939192015105	2568.911677736195	1032.5611	0.5849693483625299	0.4019449593961614
tkv	2416.92903	2108.6545	834.2432	805.8679	55.9705	57.64796	1.07397	4.34651	872.7573101745	778.132	1656.024784	2403.3519	2262.791765	820.05555	2029.688342	825.44465508725	0.36240875660072064	0.40668541963140964
cype	2574.987	1329.9948	758.81400227962	697.89	2.00574577	5.00789	2.01458	1.00469	602.1863	607.1105	1097.994	2175.99	1952.4909	728.35200113981	1636.9919999999997	604.6484	0.3730373345861996	0.3693655191961843
vri	368.3183	265.4027	78.6075	107.21697	6.47319	18.1172	8.68119	5.59741	77.39253	71.783	323.5267	589.8831	316.8605	92.91223500000001	456.7049	74.58776499999999	0.2932275717547628	0.16331719891772561
Septin1	3218.85	2547.0	1895.79	1829.82	2.25129	2.25973	1.34189	0.0	2208.76	1997.95	2392.93	4275.41	2882.925	1862.8049999999998	3334.17	2103.355	0.6461510445120839	0.6308481571125647
Bub1	1129.9998513	1535.0004	1378.4548222	1450.6567	1.01948	1.0148	0.0	0.0	1395.55	1659.34	1473.98	2079.99	1332.50012565	1414.5557611	1776.985	1527.445	1.0615802084145942	0.8595711274996694
CG14036	1603.0	1110.0	494.0	532.0	2.0	1.0	2.0	1.0	504.0	483.0	708.0	1282.0	1356.5	513.0	995.0	493.5	0.37817913748617765	0.49597989949748744
qtc	332.69267	136.0	21.09002	33.1795485521	6.086470238294	21.3467087	0.0	0.0	12.0000000974101	25.82049853	77.9135	132.821981671797	234.346335	27.13478427605	105.3677408358985	18.910249313705048	0.11578924106515255	0.17946905916067982
Ran	21874.9952	13221.9868	9141.8909	9219.3805	1688.82	3099.42	2.00608	5.00995	7249.12	6600.62	9193.18	16217.6	17548.491	9180.635699999999	12705.39	6924.87	0.5231581279552754	0.5450340367355901
senju	715.905	575.0	403.489	437.311	1.35512	1.30682	0.0	0.0	439.298	421.689	441.927	747.939	645.4525	420.4	594.933	430.49350000000004	0.6513260077232639	0.7235999683998031
CG14043	799.872	795.0	600.0	614.315	6.0063	3.00628	115.128	84.0	779.0	807.685	970.994	1469.9953	797.4359999999999	607.1575	1220.49465	793.3425	0.7613871207219138	0.6500171877033627
mRpL14	707.933	447.0	234.381	260.8984	0.0	0.0	1.06688	0.0	426.619	400.101	593.0	1031.0	577.4665	247.6397	812.0	413.36	0.4288382096623787	0.509064039408867
Ilp6	427.99975	230.99533	50.4886	49.15592	7.02943	3.0	0.0	1.00484	21.5114	33.8441	267.97022	539.0002	329.49754	49.82226	403.48520999999994	27.677749999999996	0.15120677380474523	0.0685966903223045
CG14053	187.87987	117.0	59.5603	60.0	78.0	134.0	28.1203	9.0	50.4397	42.99996	239.0001	506.0005	152.439935	59.78015	372.5003	46.71983	0.39215544142025516	0.12542226140489016
Pop5	307.0	170.0	87.0	84.0	0.0	1.0	1.0	0.0	58.0	52.0	88.0	141.0	238.5	85.5	114.5	55.0	0.3584905660377358	0.48034934497816595
Ilp8	529.114	469.571	762.481	849.545	1.43429	0.0	161.886	109.429	1023.52	1255.45	879.566	1459.0	499.34250000000003	806.0129999999999	1169.283	1139.4850000000001	1.614148605416122	0.9745160068178536
U2A	1114.0	651.983	472.902	425.829	1.00799	0.0	0.0	1.01657	513.098	471.171	650.992	1101.0	882.9915	449.3655	875.996	492.1345	0.5089125999514151	0.5617999397257522
CG1407	1136.2436	1020.15946	780.5212	773.54638	0.0	2.4142	33.73455016254	32.6448021867	1317.7835589	1327.64006	1313.657003332	2167.39474	1078.20153	777.03379	1740.525871666	1322.71180945	0.7206758369189106	0.7599495250156345
CG14073	2258.49	2463.63	1847.914	2418.772	89.7957000104593	139.182	92.1231	78.0887	2398.11	2714.68	2185.52	3690.49	2361.06	2133.343	2938.005	2556.395	0.9035530651487044	0.8701125423544207
CG14074	227.0	184.0	185.0	176.496	0.0	0.0	0.0	1.0	290.0	238.504	245.0	421.0	205.5	180.748	333.0	264.252	0.879552311435523	0.7935495495495496
Mkp3	1218.8854	911.8842	691.8098	748.14539	2.85152	0.0	1.11466	1.11529	1185.19	1120.85	1556.15	2467.0	1065.3847999999998	719.9775950000001	2011.575	1153.02	0.6757911272997327	0.573192647552291
Bet1	516.245	301.9	207.769	186.8446	12.023	9.0	0.0	1.0	253.999	250.0	315.977	560.0	409.0725	197.3068	437.9885	251.9995	0.4823272158358238	0.5753564305912142
CG14100	871.0	540.998	270.0	340.0	1.0	0.0	1.0	1.0017	414.0	400.0	697.0	1027.0	705.999	305.0	862.0	407.0	0.4320119433596931	0.47215777262180975
CG14102	209.0	224.972	28.3149	35.458	0.0	0.0	0.0	1.02793	196.38	160.078	257.44	463.849	216.986	31.88645	360.6445	178.22899999999998	0.14695164665001428	0.49419580778301064
TORIP	1021.999	603.0	408.0	391.4676	0.0	1.00093	1.00088	0.0	468.851	428.826	669.055	1021.39	812.4995	399.7338	845.2225	448.8385	0.49198036429560876	0.5310299950604723
CG14104	91.0976	82.7579	19.3743	36.4119	0.0	0.0	0.0	0.0	19.8352	17.2504	24.9205	44.7552	86.92775	27.893100000000004	34.83785	18.5428	0.3208768201178565	0.5322601710495911
CRMP	447.8092	165.0	36.1476	39.8098	2.67735	1.13246	1.19065	0.0	28.8524	34.1902	41.32265	55.8675	306.40459999999996	37.9787	48.595075	31.521299999999997	0.12394950989639192	0.6486521525072242
RhoGAP19D	1312.3158667	1382.160844	796.350609493919	912.10909	1.12469	3.3766669097	82.68369149	69.8390317880379	1212.6493152319	1182.8916719	1821.87550052213	2980.624	1347.23835535	854.2298497469595	2401.249750261065	1197.77049356595	0.6340599244036803	0.4988112933424471
ver	78.0	50.0	26.0	24.0	0.0	0.0	12.0	6.0	75.0	51.0	64.0	104.0	64.0	25.0	84.0	63.0	0.390625	0.75
CG14130	153.0	75.0	44.2226	65.7595	0.0	0.0	0.0	0.0	46.7774	41.2405	73.0	116.0	114.0	54.99105	94.5	44.00895	0.48237763157894736	0.46570317460317456
CG14131	261.9847	152.0	119.0715	124.6943	3.19043	8.17973	1.015444	0.0	114.9285	94.3057	214.8093	492.82	206.99235	121.8829	353.81465000000003	104.6171	0.5888280412295431	0.2956833471988794
CG14132	0.0	3.0	0.0	2.67697	0.0	0.0	1.0	0.0	50.0	50.323	5.0	9.0	1.5	1.338485	7.0	50.161500000000004	0.8923233333333332	7.165928571428572
Pldn	232.821	201.825	98.7346	108.936	0.0	1.00489	0.0	0.0	188.03844	155.45129	256.80088	483.80694	217.32299999999998	103.8353	370.30391	171.744865	0.47779250240425547	0.4637943601513687
CG14135	269.9998	201.9997	91.0	83.99999	0.0	0.0	0.0	1.000000156622	236.0004	220.9999	229.9996	418.0001	235.99975	87.499995	323.99985	228.50015000000002	0.3707630834354697	0.7052477030467762
Blos2	165.903	114.877	76.6797	84.6835	1.00988	0.0	19.0966	8.12323	102.32	71.3165	108.99	133.0	140.39	80.6816	120.995	86.81825	0.5746962034332931	0.7175358485887847
Blos4	217.0	135.0	149.9998	132.0003	31.0	53.0	23.0	27.0	183.0	145.0	193.0	278.0	176.0	141.00005	235.5	164.0	0.8011366477272727	0.6963906581740976
CG1416	3888.23000001832	2317.83	1402.148	1341.952	5.15599	7.21028	79.775900441727	73.1711000147838	1935.857	1874.043	2426.842	4200.79	3103.03000000916	1372.05	3313.816	1904.9499999999998	0.44216459396008084	0.5748508667952595
dpr6	1180.753	942.8563	90.50705	129.15686	54.89515	115.89839	33.2469912	36.1441	1527.493	1730.843	407.1043	1145.1012	1061.80465	109.831955	776.10275	1629.1680000000001	0.10343894707938978	2.0991653489180395
slgA	3282.09620631404	3192.93346	1220.327766894	1330.70122728489	9.521093320641	18.88956	475.8961	505.070256655046	1093.6582	1062.2954	1950.4757	2937.108	3237.51483315702	1275.5144970894448	2443.79185	1077.9768	0.3939795067581648	0.44110827196677976
CG14174	218.0	153.0	89.0	68.0	0.0	0.0	0.0	0.0	50.0	44.0	102.0	225.0	185.5	78.5	163.5	47.0	0.42318059299191374	0.2874617737003058
CG1418	564.0	407.0	302.656	279.705	9.0	4.03664	0.0	0.0	291.3437	249.295	239.0004	436.963	485.5	291.1805	337.98170000000005	270.31935	0.5997538619979402	0.7998046935677285
Use1	488.721	314.711	213.713	220.081	0.0	0.0	1.00192	0.0	523.697	529.386	632.0	1001.0	401.716	216.897	816.5	526.5415	0.5399262165310816	0.6448763012859767
CG14182	218.8043	168.3802	113.97738	103.96652	4.86907	19.0127	1.19569	2.6198	167.023	117.033	179.131	330.987	193.59225	108.97194999999999	255.05900000000003	142.028	0.5628941757740819	0.5568437106708642
Lamtor1	498.0	354.0	210.959	205.641	0.0	0.0	0.0	0.0	259.041	204.359	327.0	580.0	426.0	208.3	453.5	231.7	0.4889671361502348	0.5109151047409041
CG14187	483.0	134.0	34.999976622	13.0	0.0	0.0	0.0	0.0	25.0	16.0	69.0	39.0	308.5	23.999988311	54.0	20.5	0.07779574817179903	0.37962962962962965
CG14194	1694.9755	1437.9941	1016.202	1151.7056	0.0	5.06306	0.0	0.0	1156.6	1140.0	1111.39	2101.74	1566.4848	1083.9538	1606.565	1148.3	0.6919657311708355	0.7147547718268479
CG14196	71.0	42.0	85.3948	67.0958	0.0	0.0	0.0	0.0	92.6052	63.90423431	28.0	69.0	56.5	76.2453	48.5	78.254717155	1.3494743362831858	1.613499322783505
ksh	764.0	419.0	255.102	247.0	0.0	1.01024	0.0	0.0	252.898	218.0	291.0	598.99	591.5	251.051	444.995	235.449	0.42443110735418427	0.5291048214024877
Slu7	773.0	594.945	426.232	462.559	0.0	2.01702	0.0	3.05481	644.768	610.441	632.0	1212.98	683.9725000000001	444.3955	922.49	627.6045	0.6497271454627196	0.6803374562325879
CG14200	1813.181	2096.842	1244.751	1529.4699455	3.01974	4.01668	10.2651	13.4575	1490.2483	1678.532	2677.978	4740.979	1955.0115	1387.11047275	3709.4785	1584.39015	0.7095152497824182	0.4271193781012614
RpS10b	46401.0711	21030.9382	7790.6317	8533.098	24.006	41.97913	14.9753	15.0591	8621.37	7754.9	19739.0	39331.0	33716.00465	8161.86485	29535.0	8188.135	0.24207686927104513	0.27723497545285253
CG14207	1411.0268	1013.9353	750.879	677.256	7.06139	1.35396	13.97092	20.0651	502.12085	401.744	251.939	497.6456	1212.48105	714.0675	374.7923	451.932425	0.5889308538059213	1.2058209973897542
CG14210	1170.92	629.503	173.954	177.130000011818	0.0	0.0	0.0	0.0	182.475	119.88	537.953	968.991	900.2115000000001	175.54200000590902	753.472	151.1775	0.19500084147548546	0.20064116516605796
MKP-4	1657.003	1110.964	699.648	682.589	1.00136	1.00478	0.0	2.03639	550.352	488.411	941.999	1613.0	1383.9834999999998	691.1185	1277.4995	519.3815	0.4993690314949565	0.40656102018043844
CG14212	19.93	15.0612	3.0	7.61339	0.0	0.0	21.1293	27.0903	21.8173	32.9115	33.5817	57.685	17.4956	5.3066949999999995	45.63335	27.364399999999996	0.30331597658839937	0.5996579256179964
Rcd-1	2656.0017	1760.00031	1721.0037	1809.385	2.0	7.0	1.00077	2.0	3191.003	2831.6178	3080.004	5626.0	2208.001005	1765.19435	4353.002	3011.3104000000003	0.7994535989805855	0.6917778581310093
Sec61gamma	3580.989	1830.995	889.108	870.542	3.00521	3.00938	17.0113	12.0052	921.892	948.458	1558.99	2600.99	2705.992	879.825	2079.99	935.175	0.32513954217159546	0.44960552694964884
Elys	2334.002	2509.999	1586.848	1811.914	20.0417	6.0097	2.00086	0.0	2302.15	2526.09	2800.96	4846.99	2422.0005	1699.3809999999999	3823.975	2414.12	0.7016435380587245	0.6313116586797769
Ssu72	832.984	547.0	420.9003	450.6307	0.0	2.0241932686	1.01567	0.0	717.1	752.369	742.0	1249.98	689.992	435.7655	995.99	734.7345	0.6315515252350752	0.7376926475165414
Tao	7027.835946	7101.18143477	4849.176	5176.1284	40.67344	126.74562	296.1647	350.8164	6734.8188	6410.86833	7724.324	12600.257	7064.508690385001	5012.6522	10162.2905	6572.843565	0.7095542548942383	0.6467876080692636
CG14218	16.8177	13.00000295066	2.00000146735	0.0	0.0	0.0	1.18227	0.0	6.0	3.0	30.00002	120.9995	14.90885147533	1.000000733675	75.49976	4.5	0.06707429712675876	0.059602838472599125
p115	814.936	727.968	436.272	526.21	4.13063	2.03871	3.06452	3.03194	476.728	523.791	618.869	891.961	771.452	481.241	755.415	500.2595	0.6238119805250358	0.6622313562743658
CG14220	580.318	418.3414	311.0806	340.4096	0.0	2.06991	98.6823	79.659	471.92	366.591	478.0	897.93	499.3297	325.7451	687.9649999999999	419.2555	0.6523647601975208	0.6094139963515587
Naa20A	1817.7804	1094.9999	700.8464	741.0187	0.0	3.215138	2.22129	0.0	1024.15	826.981	1283.0	2450.78	1456.3901500000002	720.93255	1866.89	925.5655	0.49501333828713406	0.4957793442570264
CG14223	407.0	349.0	28.1982	14.0	0.0	1.0	2.0	7.0	65.8017	42.0	194.9998	447.9998	378.0	21.0991	321.4998	53.90085	0.05581772486772487	0.1676543811224766
Ubqn	6204.03	6451.73	4421.63124334	4590.29240959	26.8881	47.5283	81.606	64.1547	4858.74	4731.85	5964.05	9823.18	6327.879999999999	4505.961826465	7893.615	4795.295	0.7120807958534296	0.6074903577131644
et	9.0	6.0	2.0	4.0000000293314	0.0	0.0	0.0	0.0	10.0	2.0	102.0	245.0	7.5	3.0000000146657	173.5	6.0	0.4000000019554267	0.0345821325648415
dome	2745.07	2731.57	1840.97	1967.01	8.19666	15.3851	12.9314	18.4302	1896.03	1799.99	2534.8	3884.61	2738.32	1903.99	3209.705	1848.01	0.6953131847264016	0.5757569620884162
CG14227	16.0	2.0	1.0	5.0	0.0	0.0	5.36408	7.11773	42.6329	40.8608	29.0608	61.2918	9.0	3.0	45.1763	41.746849999999995	0.3333333333333333	0.924087408663392
Mer	1970.001	1343.9607	979.5404	1160.9305	2.08754	2.07494	0.0	1.03532	1407.46	1322.07	1497.91	3115.93	1656.98085	1070.23545	2306.92	1364.7649999999999	0.6458948816457354	0.5915961541795987
CG14229	518.0004	351.9974	283.9996	254.0004	12.0	24.0	1.0	1.00266	406.0	342.0	344.0	732.0	434.99890000000005	269.0	538.0	374.0	0.6183923683485176	0.6951672862453532
CG14230	1580.46	1315.31	958.299	835.707	1.0	4.0	52.5416	38.6916	843.701	862.293	934.0	1772.0	1447.885	897.0029999999999	1353.0	852.9970000000001	0.6195264126639891	0.6304486326681449
Tcs4	1079.101	605.0658	259.1099	297.5028	0.0	2.00657	0.0	0.0	274.0	234.498	610.0	1069.99	842.0834	278.30634999999995	839.995	254.249	0.33049737116299877	0.3026791826141822
CG14232	736.848	547.85	445.6291	428.793	0.0	0.0	31.1519	28.1499	230.371	215.208	231.0	372.0	642.3489999999999	437.21105	301.5	222.7895	0.6806440891166641	0.7389369817578773
meso18E	136.99990247437	83.0	33.3458	61.95217	15.81	32.9663	0.0	0.0	28.6542	16.0479	68.19	142.2709	109.999951237185	47.648984999999996	105.23045	22.35105	0.433172782933857	0.2124009732924263
COX6B	3943.762	2148.1499	1238.0899	1387.1078	241.91	413.831010859234	29.23814	24.96707	1198.5593	1100.0912	1835.1288	3608.836	3045.95595	1312.5988499999999	2721.9824	1149.3252499999999	0.4309316587457543	0.42223831057834904
mst	604.7231	571.4104	252.7355	274.3023	2.03056	4.07984	11.2768	20.5896	533.265	555.698	671.969	1032.92	588.06675	263.51890000000003	852.4445000000001	544.4815	0.4481105248681379	0.6387295595197106
CG14252	114.0	71.0	28.7895	23.0	0.0	2.07005	0.0	0.0	45.2105	38.0	45.0	118.93	92.5	25.894750000000002	81.965	41.60525	0.27994324324324327	0.5075977551393888
SecS	716.0	443.9995	179.00017	183.0003	0.0	0.0	0.0	0.0	367.0	351.0	367.0	591.0	579.99975	181.000235	479.0	359.0	0.312069505202373	0.7494780793319415
CG14270	992.0	601.0	298.0	361.0	0.0	3.0	0.0	0.0	346.0	279.0	478.0	746.0	796.5	329.5	612.0	312.5	0.41368487131198994	0.5106209150326797
CG14275	157.0001	65.9175	13.0	17.99999	1.0	0.0	29.00002468	6.08244763	18.0	19.0	73.0	140.0	111.4588	15.499995	106.5	18.5	0.13906479344834147	0.17370892018779344
mRpL55	611.0	327.0	156.596	147.666	0.0	1.14751	0.0	0.0	170.404	162.334	188.0	411.852	469.0	152.131	299.926	166.369	0.32437313432835824	0.5547001593726453
CG14286	574.0	374.0	172.0	165.434	1.0	0.0	0.0	1.0	288.0	234.566	406.0	779.0	474.0	168.71699999999998	592.5	261.283	0.3559430379746835	0.44098396624472574
Mef2	1183.4564116393	1238.768702462	1121.38268479162	1132.42040035192	6.81664	16.487	53.39666109786	46.65142378383	1539.217	1531.2525	1664.1837	2735.5111697	1211.1125570506501	1126.90154257177	2199.8474348500004	1535.23475	0.930468052710184	0.6978823738768422
Mpc1	1696.0	1120.997	743.188	733.911	18.1751	36.2116	0.0	1.00369	887.812	716.089	932.825	1688.79	1408.4985000000001	738.5495	1310.8075	801.9505	0.5243523511029652	0.6117988339248899
Sgsh	17.0	9.0	11.0	11.5341	0.0	0.0	1.0	0.0	15.0	9.46593	13.0	25.0	13.0	11.267050000000001	19.0	12.232965	0.866696153846154	0.6438402631578948
CG14292	48.7276	73.3463	6.27598	17.2147	0.0	2.01465	8.27244	9.65366	17.724	67.7853	121.0	293.985	61.036950000000004	11.74534	207.4925	42.754650000000005	0.19242999527335491	0.20605395375736474
EndoA	957.3111	928.11675	525.6217	554.6624	4.98677	7.38732	62.689	53.8834	674.378	651.338	763.013	1077.61	942.713925	540.14205	920.3115	662.858	0.5729649638940042	0.7202539574915666
Epg5	1483.33	1394.0400428092	809.44400840567	1036.138	3.02513	4.04363	42.6678	47.9599	1034.56	1159.86	1448.97	2417.96	1438.6850214045999	922.791004202835	1933.4650000000001	1097.21	0.6414128113337182	0.5674837661917852
bys	2132.35	1272.8	568.907	564.385	1.03349	2.07291	17.6454	8.19882	790.093	622.615	1079.97	2018.93	1702.5749999999998	566.646	1549.45	706.354	0.33281705651733406	0.4558740198134822
CG14304	96.96150233105	129.389004563112	58.95970470005	67.830811216	0.0	0.0	1.0385875558	4.61073	1.04028	1.16922	16.0	20.00001	113.17525344708099	63.395257958025	18.000005	1.1047500000000001	0.5601512347190603	0.061374982951393625
fru	323.2651	148.46543	52.557930333144	72.44483	38.08994	66.0934	12.7347	5.53459	46.44198	51.55504	133.91001	312.9062	235.86526500000002	62.501380166572	223.408105	48.998509999999996	0.2649876410016201	0.2193228844584667
CG14309	2928.05	2046.63	510.546	282.16	0.0	1.02217	457.949	300.366	811.454	401.84	1735.0	893.978	2487.34	396.353	1314.489	606.6469999999999	0.15934813897577332	0.4615078559044617
CG14314	263.523	416.1	34.8895	28.2503	0.0	0.0	67.4771	110.062	619.297	402.715	65.9331	174.362	339.8115	31.569899999999997	120.14755	511.006	0.09290415421491031	4.253153726397251
CG14322	1233.5046107955	1513.07321	1148.087793	1308.316913594	3.015408094	0.0	37.51179084	48.6093671	1935.53151714	1996.66000445289	1552.664214	2354.96280064121	1373.28891039775	1228.202353297	1953.813507320605	1966.0957607964451	0.8943510313072228	1.006286297760672
Atu	2150.79	1614.73	983.295	1061.43	1.00686	2.01711	1.02538	2.04972	1102.51	1062.54	1373.99	2573.98	1882.76	1022.3625	1973.9850000000001	1082.525	0.5430126516390831	0.5483957578198416
Dus2	884.0002	633.0002	203.0	238.59061	2.0045	0.0	0.0	0.0	195.0	164.41	441.995	834.0	758.5002	220.79530499999998	637.9975	179.70499999999998	0.29109459035080015	0.2816703827209354
CG14341	272.0	173.0	130.0	109.0	1.00617	1.0	0.0	0.0	117.0	124.0	176.994	312.0	222.5	119.5	244.497	120.5	0.5370786516853933	0.4928485830091984
CG14346	8.000001	3.0	3.0	8.0	0.0	2.0	0.0	0.0	29.0	40.0	2.0	5.0	5.5000005	5.5	3.5	34.5	0.9999999090909174	9.857142857142858
CBP	1963.4006	1952.1979	2256.89565	2245.87501	2.3659	8.28197	113.599	118.802	2524.1	1872.12	4351.63	6545.72	1957.79925	2251.38533	5448.675	2198.1099999999997	1.149957193006382	0.40342101520094326
CG14352	416.113	316.059	188.415	235.898	2.0	1.00305	0.0	0.0	198.509	180.0	201.0	333.997	366.086	212.1565	267.49850000000004	189.2545	0.5795263954371377	0.7074974252192068
Wdr92	242.622	176.623	119.617	144.877	0.0	1.0	0.0	0.0	268.371	233.832	385.0	660.0	209.6225	132.247	522.5	251.1015	0.6308817040155519	0.48057703349282294
NijC	24.00001	19.999999	10.0	7.0	0.0	0.0	1.0	0.0	7.0	3.0	24.00002	79.99996	22.0000045	8.5	51.99999	5.0	0.38636355733472694	0.09615386464497398
Ret	3.16344	2.10277	0.0	3.16542	0.0	0.0	0.0	0.0	56.7677	67.6673	42.4215	57.8049	2.633105	1.58271	50.113200000000006	62.2175	0.6010812329929874	1.2415391553522823
CG1440	4613.3758	3972.2256	3293.01141	3295.2803	462.05237	891.30171	162.874	123.279	3050.51	2890.173	3805.942	6049.7	4292.8007	3294.1458549999998	4927.821	2970.3415	0.7673651970379151	0.6027697637556234
CG14401	62.4503	39.42228	40.6412	40.26083	4.49874	10.1155	0.0	0.0	65.0	54.0	37.0	55.0	50.93629	40.451015	46.0	59.5	0.7941492205262691	1.2934782608695652
Grx5	819.0	519.921	328.649	304.894	1.15069	0.0	0.0	1.07882	368.351	349.106	648.849	1057.0	669.4605	316.7715	852.9245000000001	358.7285	0.47317429482396645	0.4205864645698417
CG14408	829.7738	869.83419	545.0699214	563.40140239159	9.79555	25.8453	5.22609	3.16605	523.9309	524.5992	669.20471	1088.1545	849.803995	554.2356618957949	878.679605	524.26505	0.6521923468902908	0.596650982925682
CG14410	111.0	52.0	9.0	4.0	0.0	0.0	2.0	7.0	31.0	22.0	59.0	127.0	81.5	6.5	93.0	26.5	0.07975460122699386	0.2849462365591398
CG14411	2809.859219	2698.92644	1346.744	1519.4423	119.98678	234.34437	5.139297	3.0705566	1993.257	2155.5569	2996.008	5553.658	2754.3928295	1433.09315	4274.8330000000005	2074.40695	0.5202936685905281	0.4852603481820225
mRpS25	656.0	412.0	266.662	215.317	0.0	0.0	0.0	0.0	257.338	258.683	371.0	638.0	534.0	240.9895	504.5	258.0105	0.45129119850187266	0.511418235877106
CG14414	287.9999	145.0003	137.52624	195.5024	2.02076	3.03934	0.0	0.0	191.4732	170.497	279.9788	447.961	216.50010000000003	166.51432	363.9699	180.9851	0.7691189057187501	0.49725293217928185
eIF4E6	0.9999995	2.999998	0.0	1.012981	0.0	0.0	0.0	0.0	278.9997	254.9872	375.9998	625.9999	1.99999875	0.5064905	500.99985000000004	266.99345	0.25324540827838016	0.5329212174414822
wat	22.0	5.0	13.3356	19.7826	0.0	1.36089	0.0	0.0	142.664	154.217	53.0	161.639	13.5	16.5591	107.3195	148.4405	1.2266000000000001	1.3831642898075371
bou	164.748	78.8451	43.6558	31.6533	26.4082	58.6811	31.2524	21.1549	27.3442	27.3467	100.592	279.319	121.79655	37.65455	189.9555	27.34545	0.30915941379291945	0.14395713732953244
CG14431	11.29603340964	11.8298	7.0	19.8803	1.16029	0.0	0.0	0.0	15.0	4.0	10.0	20.0	11.562916704820001	13.44015	15.0	9.5	1.1623494610488263	0.6333333333333333
CG14434	1174.0021	616.9997326	406.6216	430.5411	0.0	3.00611	0.0	0.0	500.378	501.459	636.0	1212.99	895.5009163	418.58135	924.495	500.9185	0.46742704823740444	0.5418293230358195
CG14435	1395.184	1523.326	731.144	819.896	0.0	3.54925	133.816	123.674	1181.856	1112.103	1501.0	2246.451	1459.255	775.52	1873.7255	1146.9795	0.531449266920449	0.6121384909369061
Coq7	981.994	561.0	339.0	431.236	0.0	0.0	1.00605	0.0	313.0002	236.7644	582.0	932.0	771.4970000000001	385.118	757.0	274.8823	0.49918275767760595	0.36312060766182297
sov	2445.983	2832.97	1951.4312	2639.5533	4.01704	9.03058	5.01459	8.03268	2767.57	3380.443	3182.979	5812.97	2639.4764999999998	2295.4922500000002	4497.9745	3074.0065000000004	0.8696770931660125	0.6834201705678856
spidey	3585.16	2629.58	1427.8	1535.51	5.06628	10.1344	39.8443	21.4218	1333.2	1146.49	1857.93	3053.87	3107.37	1481.655	2455.9	1239.845	0.47681962559978375	0.5048434382507431
CG14440	762.20900185766	815.4752	392.177	453.7617	0.0	1.45778	40.8215	28.525	630.823	598.238	701.0	1201.54	788.84210092883	422.96935	951.27	614.5305000000001	0.5361901317158029	0.6460105963606548
CG14441	684.2804	593.39	262.75080135531	277.4375508	19.1892	28.0052	20.71976479	14.61	419.249	452.5626	690.8110531564	1138.9948054	638.8352	270.094176077655	914.9029292782	435.9058	0.4227916308895549	0.4764503271881552
CG14442	3463.06800665657	3275.02000033001	2430.3975	2661.388	14.4949	16.62471	264.927192	219.9755	2719.609	2701.6071	3031.505	4957.375	3369.04400349329	2545.89275	3994.44	2710.60805	0.7556721572529828	0.6785952599112767
APC7	3319.87	2311.901	1137.0	1161.766	1.00155	0.0	54.1264	48.1004	1516.0	1376.23	1955.0	3106.0	2815.8855	1149.383	2530.5	1446.115	0.40817817343780494	0.5714740169926892
dtn	2105.7070000513	2054.3636188	1257.6285	1541.208	122.729	250.335	25.28923	19.63297	1319.372	1514.793	1875.27	3176.67	2080.0353094256498	1399.4182500000002	2525.9700000000003	1417.0825	0.6727858145765876	0.5610052771806474
Grip	81.748100419589	39.9518	33.8285	32.7959340367675	0.0	0.0	2.25186	2.04819	55.171509624	63.204	75.0	130.0	60.8499502097945	33.31221701838375	102.5	59.187754812	0.5474485501390232	0.5774415103609756
CG14450	469.0	376.0	344.5519	370.0	0.0	0.0	0.0	0.0	237.449	218.0	252.0	487.0	422.5	357.27594999999997	369.5	227.7245	0.8456235502958579	0.6163044654939107
PIG-H	470.339	259.21	150.0435	155.3419	0.0	1.00525	0.0	0.0	163.899	168.476	187.605	295.429	364.7745	152.6927	241.517	166.1875	0.41859477567647957	0.688098560349789
CG14464	2147.2661	1447.1182	730.5452	665.5955	5.44942	1.66999	1.06381	1.05867	781.261	574.189	1410.02	2150.56	1797.1921499999999	698.07035	1780.29	677.7249999999999	0.38842276826103433	0.3806823607389807
poe	9542.563	6346.47	5075.9	8646.01	26.288374	29.692339	573.432	350.528	7184.1	10791.0	6882.71	12064.3	7944.5165	6860.955	9473.505	8987.55	0.8636088804145602	0.9487037796464983
GCS2alpha	5741.3341	4015.4921	2797.518	3115.6839	12.2388	23.59717	24.6696	18.5131	3958.483	4063.313	4425.76	6451.403	4878.4131	2956.60095	5438.5815	4010.898	0.6060579310103935	0.7374897296289483
CG14478	3033.7501	4174.8573	3769.382	3671.5400134772	204.0154444	356.93273	2.250738	5.62854	4970.6203744	4752.4602	4771.7202	7431.275	3604.3037	3720.4610067386	6101.4976	4861.5402872	1.032227391587063	0.7967782019942121
Inx3	806.0	355.875215985	312.1297	379.8319	1.06629	5.26274	0.0	1.12437	188.871	184.168	286.934	528.737	580.9376079925	345.98080000000004	407.8355	186.5195	0.595555865621402	0.45734003047797456
UQCR-6.4	1735.797	1012.167	525.134	489.681	1.00698	4.011828	0.0	0.0	426.467	421.012	751.993	1240.99	1373.982	507.4075	996.4915000000001	423.7395	0.36929705047082134	0.42523142445269224
CG14483	407.9855	238.77762	84.3746	69.47621	1.0	1.00436	169.015	101.223	151.625	134.524	228.0	450.996	323.38156000000004	76.925405	339.498	143.0745	0.237878143082741	0.4214295813230122
olf186-M	4309.09	2954.66	1520.12	1454.76	0.0	8.2531	91.9132	70.3409	1809.88	1611.24	2455.0	4142.75	3631.875	1487.44	3298.875	1710.56	0.4095515401824127	0.5185282861581599
zfh2	17.0	15.2243	7.40676	2.27484	0.0	1.07316	0.0	0.0	23.387704304	11.7508323	12.6240883	51.170354966	16.11215	4.8408	31.897221633	17.569268302	0.30044407481310687	0.5508087351352041
CG14502	233.99977	143.0	135.0	93.0	5.0	8.0	0.0	0.0	7.0	4.0	7.0	17.0	188.499885	114.0	12.0	5.5	0.6047749047698358	0.4583333333333333
Cyt-c1L	6.0	4.0	7.22979	5.19299	8.37811	2.10211	0.0	0.0	483.77	470.807	452.622	747.898	5.0	6.21139	600.26	477.2885	1.242278	0.7951362742811449
Apc	2534.62199352	2280.533223	1366.99600230866	1785.318039539	5.44002	7.622220159457	4.38399	5.4701	1159.0	1371.68	1680.56	2972.38	2407.57760826	1576.15702092383	2326.4700000000003	1265.3400000000001	0.6546650938753942	0.5438883802499065
CG14511	197.401	144.957	82.9619	124.476	0.0	1.00163	0.0	0.0	104.902	80.2861	113.078	191.703	171.179	103.71895	152.3905	92.59405000000001	0.6059093113057092	0.6076103825369692
Alg13	137.0	102.0	70.0	65.0871	0.0	0.0	0.0	0.0	126.0	122.913	151.0	245.0	119.5	67.54355000000001	198.0	124.4565	0.5652179916317992	0.6285681818181819
yem	4234.56	3563.56	2694.86	2984.66	54.4334	122.3514	3.43994	3.43311	3032.14	2881.34	3304.57	5572.65	3899.0600000000004	2839.76	4438.61	2956.74	0.7283191333295718	0.6661409765669883
Brd8	924.0	835.979	584.716	582.301	0.0	0.0	0.0	2.02127	851.284	747.699	965.0	1666.0	879.9895	583.5085	1315.5	799.4915	0.6630857527277314	0.6077472443937666
superdeath	8737.564	8331.031	4637.652	5429.102	4.05361	7.06314	4.03054	2.01953	5173.48	5320.13	4104.87	6952.23	8534.2975	5033.377	5528.549999999999	5246.805	0.5897822287071666	0.9490381745665682
beta4GalNAcTB	1018.14	583.455	447.759	454.047	0.0	0.0	0.0	1.00166	343.833	335.335	398.989	665.983	800.7975	450.903	532.486	339.584	0.5630674421436132	0.6377331986193064
Nepl19	32.0	22.0	24.0	26.0	1.0	0.0	0.0	0.0	21.0	17.0	33.0	39.0	27.0	25.0	36.0	19.0	0.9259259259259259	0.5277777777777778
Nepl21	29.0	39.0	10.0	15.715	0.0	0.0	0.0	0.0	9.0	6.28504	4.0	18.0	34.0	12.8575	11.0	7.64252	0.37816176470588236	0.6947745454545454
Nepl20	12.0	18.0	7.0	6.0	0.0	0.0	0.0	0.0	3.0	1.0	43.0	94.0	15.0	6.5	68.5	2.0	0.43333333333333335	0.029197080291970802
Klp10A	5397.3584	5077.7707	4265.1024138	4691.966342123	88.5981	153.11702	105.644	104.229	3176.8978	3113.0382	3442.406	5998.8789	5237.56455	4478.5343779615	4720.642449999999	3144.968	0.8550795575324222	0.6662160994633263
Herp	997.068	922.587	689.425	784.529	7.24689	15.5719	41.9316	20.413	1112.57165768	1018.4683	1157.7508	1938.425889	959.8275	736.977	1548.0883445	1065.51997884	0.7678223430772717	0.6882811195017043
wdn	1855.77	2276.79	1532.54	1542.1	5.44949	4.39044	2.22871	2.21069	1856.46	1566.9	2054.55	3027.61	2066.2799999999997	1537.32	2541.08	1711.68	0.7440037168244382	0.6736033497567964
Vps2	1061.0	635.0	380.24	445.884	8.07113	6.83167	0.0	0.0	443.76	418.116	633.929	1138.17	848.0	413.062	886.0495000000001	430.938	0.48710141509433963	0.4863588320968523
CG14543	628.88	367.954	118.338	131.812	0.0	1.03158	2.11971	1.04619	285.662	247.188	392.0	768.968	498.41700000000003	125.075	580.4839999999999	266.42499999999995	0.25094449025615095	0.4589704453524989
Trmt61	695.786	334.78800274128	117.98400180089	105.656	0.0	0.0	23.2145	15.2119	135.016	153.344	340.0	744.0	515.2870013706399	111.820000900445	542.0	144.18	0.2170052817226301	0.2660147601476015
CG14545	3593.0	2088.0	904.814	897.016	2.00768	4.01154	0.0	0.0	1539.19	1367.98	2168.99	3845.99	2840.5	900.915	3007.49	1453.585	0.3171677521563105	0.483321640304706
E(spl)mbeta-HLH	173.79	78.7675	11.0	1.0	0.0	0.0	2.20967	3.23246	6.0	6.0	65.0	163.0	126.27875	6.0	114.0	6.0	0.04751393247082347	0.05263157894736842
Sld5	419.725	302.0	151.41	109.749	0.0	0.0	2.27506	0.0	119.59	90.2514	170.0	283.0	360.8625	130.5795	226.5	104.92070000000001	0.3618538917177595	0.46322604856512145
CG14561	656.0	526.0002	427.45691	443.3723	1.00198	0.0	0.0	0.0	662.543	681.628	661.998	1178.0	591.0001	435.414605	919.999	672.0855	0.7367420157796928	0.7305285114440342
CG14562	793.000000234275	1142.0	796.8261153	1037.0119044	1.03269	0.0	0.0	0.0	871.174	956.988	973.967	1521.0	967.5000001171375	916.9190098500001	1247.4835	914.081	0.9477199067069628	0.7327399520715103
ORMDL	613.0	371.0	200.0	184.0	0.0	1.0	0.0	0.0	207.0	150.0	249.0	419.0	492.0	192.0	334.0	178.5	0.3902439024390244	0.5344311377245509
Cisd2	2591.0	1226.0	599.387	652.414	2.003	7.04553	0.0	0.0	776.613	696.586	1268.0	2348.95	1908.5	625.9005	1808.475	736.5995	0.3279541524757663	0.4073042204066963
CG14613	1578.427	1040.465	682.694	675.686	23.99998	43.0	1.0039	4.0	439.202	406.762	579.0	1006.0	1309.446	679.19	792.5	422.98199999999997	0.5186850011378858	0.5337312302839117
wap	2861.9025	2854.9965	2157.197	2327.937	3.59046	2.38377	1.09689	0.0	2674.873	2532.43	2722.3459	4586.672	2858.4495	2242.567	3654.5089499999995	2603.6515	0.7845396603998076	0.7124490692518348
CG14615	260.816	206.77	73.995	95.28337	1.0	3.0	0.0	1.0096	59.1728	54.9814	337.269	697.986	233.793	84.639185	517.6275	57.0771	0.36202617272544513	0.1102667458742049
l(1)G0196	2777.5587	2096.3691	1077.93947	1307.2371792317	10.51568	39.35737	4.14116	2.09844	1710.7541184	1732.46322838323	2648.67105654197	4866.28566438079	2436.9638999999997	1192.58832461585	3757.47836046138	1721.608673391615	0.4893746372754435	0.4581819263438736
Cp110	842.7246	723.4196	438.3207	514.581322	3.0	6.03048	0.0	2.0	372.12332	335.644000120581	513.746520974762	925.47227	783.0721	476.451011	719.609395487381	353.8836600602905	0.608438240872073	0.4917718727402249
CG14618	765.527	560.23	324.013	282.756	2.00884	0.0	0.889681	1.90351	395.5735	385.04166	479.73854	833.02279	662.8785	303.3845	656.380665	390.30758000000003	0.4576773873341796	0.5946360104924785
Usp2	2188.41980276869	1746.3233178	1183.34	1288.83941	233.3097123862	491.862213566	2.14819	2.210853	1343.765	1199.7118	1971.6907	3508.1323	1967.371560284345	1236.0897049999999	2739.9115	1271.7384000000002	0.6282949951870542	0.46415309399591925
Alp4	1205.0	868.0001	1695.79578	1548.1598	2.00638	11.04233	2.00152	0.0	2771.2	2670.84	1462.99	2993.96	1036.50005	1621.97779	2228.475	2721.02	1.5648603104264198	1.2210233455614266
tilB	56.0	35.9749	33.8348	31.1059	1.02806	0.0	0.0	1.02624	58.089	56.5309	80.0317	171.946	45.987449999999995	32.470349999999996	125.98885	57.30995	0.7060698081759262	0.45488112638539047
CG14621	1478.03	1245.99303	613.82403	693.1603	1.12068	4.47661	2.15375	3.22725	848.008	705.57400001946	993.61	1567.5403	1362.0115150000001	653.492165	1280.57515	776.7910000097299	0.4797992952357675	0.6065954036432224
CG14629	115.0	31.0	61.0	58.512	0.0	0.0	0.0	0.0	58.0	56.488	19.0	43.0	73.0	59.756	31.0	57.244	0.8185753424657535	1.8465806451612903
CG1463	620.8266	379.8446	146.31836	159.4331	18.0	34.0	122.174063579	62.1552393131	289.681439586	196.5668	499.0001	859.0	500.3356	152.87573	679.00005	243.124119793	0.30554637727157535	0.3580620057288656
CG14630	140.119	63.9661	0.0	0.0	0.0	0.0	0.0	0.0	10.0	2.15472	39.0	100.0	102.04255	0.0	69.5	6.0773600000000005	0.0	0.08744402877697842
abs	517.959	388.938	281.737	325.054	1.03968	0.0	1.04098	2.06156	804.263	740.946	833.96	1479.0	453.44849999999997	303.39549999999997	1156.48	772.6045	0.6690848023535197	0.6680655956004428
CG14641	1791.99	1327.99	954.249	969.146	5.05707	4.05219	1.01481	1.0133	1056.75	957.854	1295.94	2061.95	1559.99	961.6975	1678.945	1007.302	0.6164767081840268	0.5999612852118443
CG14645	5.26104	0.0	0.0	0.0	0.0	0.0	0.0	0.0	72.4918	48.6066	71.6561	100.76	2.63052	0.0	86.20805	60.5492	0.0	0.7023613224055062
CG14646	496.54	475.937	337.03	296.2528	0.0	3.00934	0.0	0.0	455.489	410.7475	523.9786	711.988	486.23850000000004	316.6414	617.9833000000001	433.11825	0.6512059411173734	0.7008575312633851
CG14647	1015.28	777.996	461.519	566.494	1.00563	0.0	1.0038	1.00372	467.481	421.417	555.994	808.0	896.6379999999999	514.0065	681.9970000000001	444.44899999999996	0.573259777078375	0.6516876173942113
lost	43078.0	28518.0	11351.2	12227.5	26.9493	45.5518	29.0015	26.9978	16660.0	14708.5	28562.9	48139.2	35798.0	11789.35	38351.05	15684.25	0.3293298508296553	0.4089653347170416
CG14650	1818.0	1918.93	1556.35	1643.66	1.00882	9.10419	0.0	8.07429	2227.65	2177.34	2205.99	3982.9	1868.4650000000001	1600.005	3094.4449999999997	2202.495	0.8563205626008515	0.7117576819106496
CG14655	36.0	22.0	20.9731	17.7586	0.0	0.0	0.0	0.0	5.02686	5.24142	10.0	14.0	29.0	19.365850000000002	12.0	5.13414	0.6677879310344829	0.42784500000000003
CG14657	1281.0006	1225.9623	574.7181	597.2498	2.19467	4.31847	0.0	1.03757	422.282	359.751	840.805	1576.68	1253.48145	585.98395	1208.7425	391.01649999999995	0.4674851390900121	0.32349032155318436
CG14667	447.98	359.0	265.558	270.321	0.0	1.00559	1.01963	0.0	356.442	316.6787	443.0001	709.994	403.49	267.9395	576.49705	336.56034999999997	0.664054871248358	0.5838023802550247
Syx16	720.0	502.921	342.47	355.87	5.35313	4.29058	0.0	1.07866	486.53	431.13	696.647	1095.71	611.4605	349.17	896.1785	458.83	0.5710426102749073	0.5119850565484443
Hcs	1182.9078	1151.8901	792.1985	965.1318	0.0	1.02246407	0.0	0.0	930.1405	878.2534	971.0004	1689.9774	1167.39895	878.66515	1330.4889	904.19695	0.7526691282358957	0.6795975148684066
CG14671	298.9996	167.0004	99.0	127.0	2.0	0.0	0.0	0.0	80.0	74.0	94.0	163.0	233.0	113.0	128.5	77.0	0.48497854077253216	0.5992217898832685
Spec2	803.445	723.388	1001.59	900.661	338.032	512.713	0.0	0.0	553.245	466.527	456.544	821.253	763.4165	951.1255	638.8985	509.88599999999997	1.2458801977688456	0.798070429027459
Cyp12e1	15.0	5.0	16.0	12.0	1.0	0.0	0.0	0.0	11.0	10.0	16.0	56.0	10.0	14.0	36.0	10.5	1.4	0.2916666666666667
Cap-H2	789.9041	558.2104	181.2646	162.7035	1.00117	2.00555	0.0	0.0	458.975	388.3666	763.62	1459.662	674.0572500000001	171.98405	1111.641	423.6708	0.2551475412511326	0.38112196293587586
CG14687	93.0	30.0	27.0	12.0	0.0	0.0	8.0	1.0	17.0	27.0	38.0	86.0	61.5	19.5	62.0	22.0	0.3170731707317073	0.3548387096774194
Phyhd1	1176.0	708.929	154.213	185.256	0.0	1.06311	0.0	1.0708	265.787	232.744	745.0	1376.94	942.4645	169.7345	1060.97	249.26549999999997	0.18009643864569963	0.23494113876923944
Fer2LCH	8790.9145	5063.0003	2569.98294	2883.7274	11.87803422616	17.365240590425	1.085129183	0.0	3226.01	3034.2823	3578.12	6936.6394	6926.9574	2726.85517	5257.3796999999995	3130.14615	0.39365842931270223	0.5953814121509999
Dph3	219.19	104.512	58.1552	34.9599	0.0	0.0	0.0	0.0	22.5156	55.9985	80.0701	190.395	161.851	46.55755	135.23255	39.25705	0.28765685723288703	0.29029290655245354
PGRP-LB	69.9287	51.88254733	6.74783	11.192961	1.10106	1.14005	1.07132	1.11742	10.25217	18.8071	82.8989	129.86	60.90562366500001	8.9703955	106.37945	14.529634999999999	0.14728353410088998	0.13658309946140912
Mrp4	224.0	168.0	62.5746	68.318	2.04357	3.04271	0.0	0.0	46.4254	49.682	185.956	353.957	196.0	65.4463	269.9565	48.053700000000006	0.333909693877551	0.17800534530563258
CDase	25.00004	11.0	2.58916	0.0	1.0543300119465	0.0	0.0	0.0	6.41084	5.0	20.9457	44.00003	18.00002	1.29458	32.472865	5.70542	0.07192103119885424	0.17569807899610954
CG14710	480.223	452.765	272.155	315.428	0.0	1.00162	0.0	2.0	429.025	375.267	378.546	615.186	466.494	293.7915	496.866	402.14599999999996	0.6297862351927356	0.8093651004496182
CG14711	1074.47	717.888	501.363	547.045	0.0	0.0	2.0073	2.0	613.637	532.955	617.0	999.0	896.1790000000001	524.204	808.0	573.296	0.5849322512578401	0.7095247524752476
CG14712	2262.96	2516.96	2328.74	2688.69	7.09685	11.1008	2.03695	2.04262	2319.26	2315.31	1832.9	3100.9	2389.96	2508.715	2466.9	2317.285	1.049689116135835	0.9393510073371437
CG14715	121.0	74.0	9.53691	2.95482	0.0	0.0	0.0	0.0	516.463	434.045	833.0	1615.0	97.5	6.245865	1224.0	475.254	0.06406015384615385	0.3882794117647059
Ho	734.989	379.953	288.353	342.036	2.0	1.0	8.01082	9.04669	349.647	316.964	455.0	820.0	557.471	315.1945	637.5	333.3055	0.5654007114271415	0.5228321568627451
Sec24AB	2340.3501	2395.3847	1731.9223	2079.6761	21.388930760232	38.255200623273	1.021300113439	2.028380156866	2197.3065007361	2450.31786	2179.61584	3700.49122	2367.8674	1905.7992	2940.05353	2323.81218036805	0.8048589207317943	0.7903979150910392
CG14721	782.0	434.0	163.306	161.0	63.4878	100.19838	0.0	0.0	194.0	137.0	454.0	727.881	608.0	162.15300000000002	590.9404999999999	165.5	0.2666990131578948	0.2800620367025107
CG14722	1601.0	1309.0	641.504	761.165	0.0	2.01401	0.0	1.00447	768.496	737.835	839.0	1601.99	1455.0	701.3344999999999	1220.495	753.1655000000001	0.48201683848797244	0.617098390407171
COX5A	6035.9979	2867.9996	1198.052902	1428.2413	5.010068521	5.01259	2.00282	2.00178	1360.95	1316.76	2340.99	4593.99	4451.998750000001	1313.147101	3467.49	1338.855	0.294956754199448	0.3861164704151995
sad	124.783	91.4481	4.51759	5.83534	0.0	0.0	10.217	12.5519	7.48241	1.16466	45.0	80.0	108.11555	5.176465	62.5	4.323535	0.04787900537896723	0.06917656
Es2	596.701	673.765	513.435	490.676	0.0	3.19071	3.2985	3.23547	701.565	688.324	739.0	1194.81	635.233	502.05549999999994	966.905	694.9445000000001	0.790348580756982	0.7187308991059101
ATP8B	146.79930189562	81.9999900498825	43.7557000516308	26.3582	2.19386	1.11269	2.20108	0.0	30.2443	47.6418	46.80612111612	121.887255473	114.39964597275124	35.0569500258154	84.34668829456	38.94305	0.3064428191863949	0.461702181643469
Gle1	1146.0	1461.0	994.614	989.25	2.05066	1.02178	0.0	0.0	1068.387	924.7496	1304.95	1873.978	1303.5	991.932	1589.464	996.5682999999999	0.76097583429229	0.626983876325604
RpL13A	50640.6136	25038.3329	6835.3066	6683.82821	19.85894	36.2272	9479.35	4110.63	10685.5	9720.04	25294.7	46896.2	37839.473249999995	6759.567405	36095.45	10202.77	0.17863798896830574	0.2826608339832306
Vps25	608.0	355.0	210.0	172.05	0.0	1.0	0.0	0.0	159.0	163.471	216.544	406.659	481.5	191.025	311.6015	161.2355	0.39672897196261686	0.517441347361935
CG14757	64.0	37.0	19.0	20.0	1.03191	2.27258	0.0	0.0	27.0	18.0	32.9681	32.7274	50.5	19.5	32.847750000000005	22.5	0.38613861386138615	0.6849784231796697
CG14763	17.85855	6.0	5.46969	7.62387	2.0	5.09414	3.32563	0.0	10.00973	4.1898290342006	10.414601	32.25279	11.929275	6.54678	21.333695499999997	7.0997795171003	0.5487994869763669	0.3327965151232378
CG14764	2699.9208	2597.9598	1809.0811	1975.4903	3.05688	3.03833	4.07946	2.03532	3302.92	3332.51	3544.94	5973.96	2648.9403	1892.2857	4759.45	3317.715	0.7143557368959956	0.6970794944794042
CG14767	2615.523	1859.627	1135.473	1186.231	3.30429	7.57772	4.69419367	3.37287354	1286.12	1260.625	1798.132	3139.01	2237.575	1160.8519999999999	2468.571	1273.3725	0.5187991463973275	0.5158338569156001
CG14777	132.74699	63.00003	21.0	15.0	0.0	0.0	2.05528	0.0	31.00003	26.99996	105.8636	253.9035	97.87351000000001	18.0	179.88355	28.999995	0.1839108457436542	0.16121538072825445
CG14778	31.8729	19.0	5.49772	3.04551	0.0	0.0	7.32478	0.0	10.5023	6.9545	28.13632	64.0967	25.43645	4.271615000000001	46.11651	8.7284	0.1679328286769577	0.18926844203952123
pck	798.895	662.937	536.001	435.492	0.0	0.0	2.1055	1.06262	640.999	558.508	699.0	1225.0	730.9159999999999	485.74649999999997	962.0	599.7535	0.6645722627497551	0.6234443866943867
Cp36	47355.0	15458.3	1718.48	5026.03	6.01542	18.0659	322.961	116.74	2411.52	6526.97	2483.98	6228.93	31406.65	3372.255	4356.455	4469.245	0.10737391603370623	1.025890316782797
mei-38	1601.727	1313.938	1043.6222	1204.956	34.05584	55.09151	3.047561	0.0	1023.46	919.471	1348.707	1992.741	1457.8325	1124.2891	1670.7240000000002	971.4655	0.7712059513009897	0.5814637845628601
rush	1850.222	1331.0651	753.1934	786.06	10.2299	11.32974	1.0046	0.0	853.725	760.512	1388.01	2143.84	1590.64355	769.6267	1765.9250000000002	807.1185	0.483846113731766	0.4570514036553081
CG14785	70.0	27.0	7.0	17.0	1.0	5.0	0.0	0.0	36.0	37.0	56.0	144.0	48.5	12.0	100.0	36.5	0.24742268041237114	0.365
Lrpprc2	1573.0	998.0	290.0	328.353	1.00431	4.00432	1.00062	0.0	651.0	615.647	1427.0	2835.0	1285.5	309.17650000000003	2131.0	633.3235	0.240510696227149	0.29719544814641013
CG14787	38.8852	22.0	9.0	6.0	1.0	0.0	6.11479	0.0	2.0	2.0	13.0	11.0	30.4426	7.5	12.0	2.0	0.2463652907438918	0.16666666666666666
Ns3	2427.852	1796.998	997.187	1067.79	1.12723	3.43242	1.1439	0.0	1133.81	973.21	1871.87	3262.57	2112.425	1032.4885	2567.2200000000003	1053.51	0.4887693054191272	0.410369972187814
O-fut2	1005.0	649.0	451.0	411.969	0.0	1.00123	5.00419	1.0	531.0	503.031	583.0	964.999	827.0	431.4845	773.9995	517.0155	0.5217466747279323	0.6679791136815979
Rab27	343.0	340.0	14.7234791	20.9094	0.0	0.0	0.0	0.0	5.27654	2.09056	5.0	9.0	341.5	17.816439550000002	7.0	3.68355	0.05217112606149342	0.5262214285714285
sta	88039.486	37953.2677	8144.6089	8853.5038	47.60801	89.69005	26.5047	27.7544	9943.39	8915.5	33569.4	62165.3	62996.37685	8499.05635	47867.350000000006	9429.445	0.13491341526254777	0.19699116412335335
Mur2B	4597.5243	2260.4732	491.1385	1019.211	1.02417	4.02368	39.422	16.7905	606.2766	1041.7897	1196.97613	2148.9764	3428.9987499999997	755.17475	1672.976265	824.03315	0.22023185339452225	0.4925551947385219
MED18	771.0	455.0	206.942	245.467	0.0	1.00597	0.0	0.0	189.058	208.533	320.0	547.99392	613.0	226.2045	433.99696	198.7955	0.3690122349102773	0.458057355977793
CG14803	1076.47	1058.99	773.6603	901.423	2.0322673	1.01165329	2.01257	1.00639	774.51	819.275	721.225	1086.27	1067.73	837.54165	903.7475	796.8924999999999	0.7844133348318395	0.8817645415340014
Vps26	2607.83	2035.11	1607.65	1784.56	3.22567	7.62293	0.0	1.08571	2027.07	2032.35	1955.77	3704.38	2321.47	1696.105	2830.075	2029.71	0.7306168074538978	0.717193007252458
CG14805	1573.95	1152.88	763.373	854.285	0.0	2.06758	1.04543	3.11968	621.627	521.715	876.0	1552.93	1363.415	808.829	1214.4650000000001	571.671	0.5932375688986845	0.4707183821682798
Coa8	963.45778	561.65456	285.979	325.33678	1.20266	1.22962	4.65381	0.0	373.085	269.157	473.997	845.571	762.55617	305.65788999999995	659.784	321.121	0.4008332789438973	0.48670625538054874
Lamtor5	678.0	355.991	220.478	197.916	4.09303	1.01859	0.0	1.00857	224.522	204.084	343.907	648.981	516.9955	209.197	496.44399999999996	214.303	0.40463988564697373	0.43167608028297255
deltaCOP	2801.97	1850.0	1112.199	1106.339	36.89373	59.84792	1.023399	0.0	1160.391	1121.617	1576.959	2834.06	2325.9849999999997	1109.269	2205.5095	1141.004	0.47690290350109743	0.5173425913604089
Gcna	5614.917	7362.849	7136.062	7848.454	5.11007	10.1997	0.0	0.0	302.3120216979	61.6551553187	190.4580733721	426.709330348	6488.883	7492.258	308.58370186005	181.9835885083	1.1546298492359932	0.5897381728566917
Pex5	924.5218	769.0	486.416	495.3602	1.00277	3.03003	0.0	0.0	559.584	519.552	744.997	1138.97	846.7609	490.8881	941.9835	539.568	0.5797245715998459	0.5727998420354496
Pgam5	1780.997	1081.0	631.86	600.2394	1.0007574	3.00125	0.0	0.0	865.97	881.1501	1366.738	2475.717	1430.9985000000001	616.0497	1921.2275	873.56005	0.43050338627189333	0.45468849993038307
CG14817	651.174	410.804	238.6366	217.536	4.00999	1.00762	0.0	0.0	229.642	235.559	425.99	706.992	530.989	228.0863	566.491	232.6005	0.4295499530122093	0.4105987562026581
CG14818	312.0003	206.0	152.00027	130.866	0.0	0.0	0.0	0.0	230.0	186.134	254.0	440.0	259.00014999999996	141.433135	347.0	208.067	0.5460735640500595	0.5996167146974064
mei-P22	29.0	39.0	6.0	13.0	0.0	0.0	1.0	3.0	5.0	7.0	3.0	2.0	34.0	9.5	2.5	6.0	0.27941176470588236	2.4
Map205	5752.994	5864.98	3670.081	4443.719	250.462	379.768	0.0	2.01735	5208.926	5074.278	4859.538	7111.227	5808.986999999999	4056.9	5985.3825	5141.602000000001	0.69838338422861	0.8590264699039704
CG14830	71.52737	27.0	3.873072	10.55886	1.33294	0.0	5.4725779	0.0	27.38279	27.44119	26.24618	55.926411	49.263685	7.215966	41.0862955	27.41199	0.1464763750417777	0.66718086082986
CG14834	4396.84	1639.88	279.875	329.11	1.04593	1.06175	3.16409	2.11612	229.125	268.89	277.954	630.938	3018.36	304.4925	454.446	249.0075	0.10088011370413072	0.5479363884817998
fliI	1471.34	1685.28	925.422	1229.41	1.05059	2.12951	95.6628	149.715	1320.58	1454.59	1843.95	2529.87	1578.31	1077.4160000000002	2186.91	1387.585	0.6826390252865407	0.6344957039841603
CG1486	1401.6400000264	1321.772	711.249000020447	733.797000365214	44.431	65.3103	8.36449	6.23244	769.751	677.203	1141.57	1719.69	1361.7060000132	722.5230001928305	1430.63	723.477	0.5306013193639644	0.5057051788372954
CG14860	219.381	241.07	111.212	126.586	0.0	1.0	0.0	0.0	180.013	124.099	174.805	243.855	230.2255	118.899	209.32999999999998	152.056	0.5164458324555707	0.7263937323842737
l(3)neo43	292.0	205.2119	69.9092	67.17	0.0	10.115	0.0	0.0	157.677	169.173	260.0	470.919	248.60595	68.53960000000001	365.4595	163.425	0.2756957345550258	0.44717677334971456
CG14868	46.0	41.0	13.6719	14.0	1.0	2.19075	0.0	0.0	6.3281	7.0	8.0	8.80925	43.5	13.83595	8.404625	6.66405	0.31806781609195406	0.7929027172538929
AdamTS-A	753.4339	259.4287	172.0595	206.9716	1.14432	3.49427	105.566	49.5715	350.9409	317.0285	331.8556	644.5056	506.43129999999996	189.51555000000002	488.18059999999997	333.9847	0.37421768757183854	0.6841416885472302
krz	2916.928	2373.934	1359.808	1561.997	139.078	254.449	1.0689	1.06913	2222.19	1922.01	2473.92	4182.55	2645.431	1460.9025000000001	3328.235	2072.1	0.552236100658078	0.6225822395353693
CG14879	280.8732	172.00044	72.282	83.09379	19.997	42.9882	1.12632	0.0	55.71798	39.90615	88.0031	176.0118	226.43682	77.687895	132.00745	47.812065	0.3430886151819302	0.3621921717297016
Cyp311a1	8.0	7.0	3.0	3.0	0.0	0.0	0.0	0.0	52.0	26.0	157.0	244.0	7.5	3.0	200.5	39.0	0.4	0.19451371571072318
CG14881	555.988	268.0	143.0	133.0	18.0	58.0	2.01177	0.0	208.0	176.0	258.0	502.0	411.994	138.0	380.0	192.0	0.3349563343155483	0.5052631578947369
CG14882	755.246	677.512	479.961	525.866	0.0	0.0	52.7046	52.3563	1109.8	985.287	1078.95	1697.51	716.3789999999999	502.9135	1388.23	1047.5435	0.7020215556290735	0.754589297162574
CG14883	896.951	881.0	714.594	649.972	1.04418	1.06169	1.04851	0.0	684.406	576.028	667.956	1094.94	888.9755	682.283	881.4480000000001	630.217	0.7674935923430961	0.7149792160172805
CSN5	1633.997	1014.0	560.71	638.204	1.0941900908836	2.12328	0.0	0.0	620.2901	662.7956	734.9058	1367.8808	1323.9985000000001	599.457	1051.3933	641.54285	0.45276259754070713	0.6101835060200593
Dhfr	624.99999	360.0	167.58	186.0	0.0	1.0	0.0	0.0	140.42	109.0	231.0	383.0	492.499995	176.79000000000002	307.0	124.71	0.3589644706493855	0.4062214983713355
Rpt6	4090.1	3033.81	2149.4	2314.56	1.06675	5.02233	482.921	358.305	3093.46	3036.29	3367.93	5010.75	3561.955	2231.98	4189.34	3064.875	0.6266165630952665	0.7315889853771715
Ttc1	1500.683	930.854	496.426	567.952	5.02022	3.00311	3.31773	2.1458	370.574	337.048	371.98	727.997	1215.7685000000001	532.189	549.9884999999999	353.81100000000004	0.4377387635886272	0.6433061782200902
Pak3	2139.41	2497.139	1594.29	1570.914	413.204	611.576	3.64995	0.0	2234.95	2037.93	2558.84	3694.91	2318.2745	1582.6019999999999	3126.875	2136.44	0.6826637656584671	0.6832508494903058
Sdhaf3	405.0	217.0	122.016	126.909	0.0	0.0	0.0	0.0	103.984	58.0907	123.0	252.0	311.0	124.4625	187.5	81.03735	0.4002009646302251	0.4321992
Der-2	1216.0	881.0	673.79	724.586	0.0	1.06219	0.0	0.0	1018.21	949.414	1098.0	1804.94	1048.5	699.188	1451.47	983.812	0.6668459704339532	0.6778038815821202
Usp7	5589.515	6122.79	4489.729	4980.092	244.208	415.4789	33.481752	15.206414	5280.273	5324.908	5372.787	8738.53	5856.1525	4734.9105	7055.6585000000005	5302.5905	0.8085360652749395	0.7515372944991597
CG14903	325.0	205.0	119.134	96.9534	0.0	1.00655	0.0	0.0	106.866	125.047	168.0	359.993	265.0	108.0437	263.99649999999997	115.9565	0.40771207547169813	0.43923498985782017
Mettl4	216.0	161.0	100.0	131.0	0.0	0.0	0.0	0.0	76.0	64.0	104.0	144.0	188.5	115.5	124.0	70.0	0.6127320954907162	0.5645161290322581
CG14907	210.0	133.0	97.0	81.0	1.0	1.0	0.0	0.0	84.0	68.0	63.0	132.0	171.5	89.0	97.5	76.0	0.5189504373177842	0.7794871794871795
CG1492	183.4616	188.6293	137.2488	142.0534	0.0	0.0	0.0	0.0	199.506	192.807	237.219	349.485	186.04545000000002	139.65109999999999	293.352	196.1565	0.7506289457764217	0.6686727890043361
Dnaaf4	15.0	6.0	5.0	2.0	0.0	0.0	2.0	1.0	5.0	4.0	23.0	45.0	10.5	3.5	34.0	4.5	0.3333333333333333	0.1323529411764706
CG14931	1389.0009	839.9998	283.829	258.628	3.06858	2.06302	0.0	0.0	756.171	699.372	1039.93	1775.94	1114.50035	271.2285	1407.935	727.7715000000001	0.24336331522910692	0.516907030509221
CG14932	11.0	1.0	2.0	2.0	0.0	0.0	0.0	0.0	44.0	34.0	4.0	8.0	6.0	2.0	6.0	39.0	0.3333333333333333	6.5
Mal-B2	331.74999	271.10521	16.6336654	15.3501016	13.2097	19.5986	111.25	91.8947	40.3663	35.6499	305.7902	572.4010222675	301.4276	15.9918835	439.09561113375	38.0081	0.0530538129222407	0.08655996333432402
CG14937	5.0	14.0	12.0	1.0	0.0	0.0	3.14176	10.4447	14.9382	9.638	31.9152	49.6852	9.5	6.5	40.800200000000004	12.2881	0.6842105263157895	0.3011774452086019
crol	3062.33	2962.51746	1700.3795	1835.73	62.13223166267	173.985920420357	618.527447301116	559.0411090519	2651.6800847519	2853.6272	4138.95200009319	7052.3370000724	3012.42373	1768.05475	5595.644500082795	2752.65364237595	0.5869210006521891	0.49192789898200656
CycY	1246.89	1062.9	730.2624	696.9240039302	3.14531	3.16477	125.112	151.102	1302.74	1197.08	1310.85	2253.84	1154.895	713.5932019651	1782.345	1249.9099999999999	0.6178857835258617	0.7012727614462968
esc	786.225	834.704	656.025	706.842	1.18923	1.15684	119.775	125.296	927.975	830.158	855.811	1370.84	810.4645	681.4335	1113.3255	879.0665	0.8407937670311284	0.7895862440948312
PLCXD	26.74361	6.56567	1.09968	4.43778	0.0	1.02203	1.25573	0.0	160.142	124.932	309.0	419.866	16.65464	2.76873	364.433	142.537	0.16624376149829717	0.39111990407015834
firl	75.00004	37.99998	5.0	14.99996	1.9999992	0.0	0.0	0.0	8.0	4.0	9.0	13.0	56.50001	9.99998	11.0	6.0	0.17699076513437786	0.5454545454545454
dpr18	5.0	3.0	0.0	2.24156	0.0	0.0	0.0	0.0	26.0	35.7584	20.0	72.0	4.0	1.12078	46.0	30.8792	0.280195	0.6712869565217392
CaMKI	2401.5365	1811.27	897.108	772.1265	24.9211	25.55162	15.46015	18.734	414.8155	237.04787467	2072.9965	3314.1607	2106.4032500000003	834.61725	2693.5786	325.931687335	0.3962286186180162	0.12100322126668218
ckd	30.99995	15.87587	38.1712	50.6919	7.0627	4.39887	0.0	2.12413	93.8289	74.3081	33.93727	100.6012	23.43791	44.43155	67.26923500000001	84.0685	1.8957129709944276	1.2497317681701001
CG14961	82.8646	38.9028	8.45861	13.0	0.0	0.0	4.13542	2.09717	10.5414	3.0	23.0	22.0	60.8837	10.729305	22.5	6.7707	0.17622623132299778	0.30091999999999997
Asciz	261.972	281.99346	202.0	191.99992	2.22007	7.0132	2.02842	2.00656	202.0	145.0	224.993	358.987	271.98273	196.99996	291.99	173.5	0.7243105472174648	0.5941984314531319
MnM	49.9805	30.0	37.1916	33.3643	0.0	0.0	1.01953	0.0	48.8084	59.6357	31.0	58.0	39.99025	35.277950000000004	44.5	54.222049999999996	0.8821637774207464	1.218473033707865
CG14965	420.0	491.0	439.435	444.0	0.0	3.00367	0.0	0.0	561.5651	490.0	541.0	803.996	455.5	441.7175	672.498	525.78255	0.9697420417124039	0.7818351132642773
CG14966	189.0	165.0	76.7753	89.9419	0.0	1.02807	0.0	0.0	120.225	98.0581	140.0	224.972	177.0	83.3586	182.486	109.14155	0.4709525423728813	0.5980817706563791
hob	1644.253	2035.421	1469.499	1974.59	3.8867	6.0163900143409	13.0097	11.197	1664.95	1844.95	1719.67	2565.56	1839.837	1722.0445	2142.615	1754.95	0.9359766653241565	0.819069221488695
CG14968	25.00003	11.0	5.26872	7.00271	2.12461	3.14686	0.0	0.0	15.73128	13.9973	50.87537	135.8532	18.000014999999998	6.135715	93.364285	14.86429	0.3408727714949127	0.15920745282845578
CG14969	1088.85	769.602	462.223	483.947	1.0014	0.0	36.154	25.398	660.777	533.053	747.999	1247.0	929.2259999999999	473.08500000000004	997.4995	596.915	0.509117265336958	0.5984113275244749
CG14971	664.714	823.06	433.45	413.95	1.09131	0.0	20.286	15.9398	781.296	709.034	936.613	1291.35	743.887	423.7	1113.9814999999999	745.165	0.5695757554574822	0.6689204443700367
Lamtor4	345.0	191.0	90.0	112.0	0.0	1.0	3.0	0.0	166.0	158.0	246.0	404.0	268.0	101.0	325.0	162.0	0.376865671641791	0.49846153846153846
Ccz1	321.938	225.0	65.0148	71.7867	0.0	0.0	2.06179	0.0	65.9852	50.2133	176.0	296.0	273.469	68.40074999999999	236.0	58.09925	0.25012250017369425	0.2461832627118644
mge	2818.0761	1539.7716	764.89263	846.966	13.71415	6.896815	114.928	93.2317	1339.11	1161.03	1822.29	3169.1	2178.92385	805.9293150000001	2495.6949999999997	1250.07	0.369874933903725	0.5008905334986847
CG14985	408.0004	275.0002	187.4133	174.188	2.0	4.0	0.0	1.0	322.5866	327.8119	355.00026	673.0	341.50030000000004	180.80065	514.00013	325.19925	0.5294304280259782	0.6326832057416016
Fit1	1328.352	1466.465	885.563	1035.986	12.1888	16.60462	115.648	101.539	1598.44	1556.01	2048.81	2973.4	1397.4085	960.7745	2511.105	1577.225	0.6875401859942887	0.6280999798893315
Ack	908.382	909.686	534.03	695.33	2.3141	3.47418	148.618	163.314	1074.97	1010.67	1184.69	1929.53	909.034	614.6800000000001	1557.1100000000001	1042.82	0.6761903295146277	0.6697150490331446
Faa	4.0	4.0	1.0	2.0	0.0	0.0	0.0	0.0	13.0	8.0	56.0	84.0	4.0	1.5	70.0	10.5	0.375	0.15
CG14995	582.980574787	516.0004	298.057361	290.53978	59.97875	100.953081341	1.01929530905	0.0	325.943	323.4605	358.02119	583.046500026785	549.4904873935	294.2985705	470.53384501339247	324.70175	0.5355844682516724	0.6900709767025542
Chd64	3580.8681	2392.3	1383.21	1346.95	19.81760211368	3.26904	7.13244	1.70134	1665.7988	1451.05	2452.18	4432.7314	2986.5840500000004	1365.08	3442.4556999999995	1558.4243999999999	0.45707067912587285	0.45270717644964903
Sqor	892.993	545.986	292.508	255.0	5.01789	0.0	3.00657	4.01429	289.492	310.0	567.982	903.0	719.4895	273.754	735.491	299.746	0.38048366237450304	0.4075454356341546
ens	6227.74940151365	5427.03798443806	3743.42538999	4018.15390400798	5.7304192	11.5255473963	101.24870458	64.966855826257	4098.5687489	4005.8454951658	5230.26978794123	8609.484738691	5827.393692975855	3880.78964699899	6919.877263316115	4052.2071220329	0.6659563179465228	0.585589450193661
RfC4	1961.87	1231.73	768.449	820.018	1.08569	2.1835	1.12659	3.26951	900.551	786.982	1077.91	1833.82	1596.8	794.2335	1455.865	843.7665	0.4973907189378758	0.5795636958097076
unc	121.99994	78.0	7.0	6.0	0.0	0.0	0.0	0.0	8.0	7.0	13.0	32.0	99.99996999999999	6.5	22.5	7.5	0.06500001950000586	0.3333333333333333
ago	6667.313	7529.2926	5132.6653546	5674.52	279.726	556.0831817	89.688284	95.709531	7058.342	6736.483	7928.277	11791.923	7098.3027999999995	5403.5926773	9860.1	6897.4125	0.7612513624101808	0.6995276417074877
CG15011	495.081	631.879	395.614	482.78	1.04073	0.0	17.9193	22.1209	539.386	504.22	549.959	811.0	563.48	439.197	680.4794999999999	521.803	0.7794367147014978	0.7668166344467395
CG15012	1013.0	548.0	193.434	274.602	1.00434	4.01522	0.0	4.0	256.566	243.398	468.996	799.985	780.5	234.01799999999997	634.4905	249.98199999999997	0.2998308776425368	0.3939885624765067
CG15014	1470.98	923.0	570.107	594.553	0.0	2.07037	1.02394	0.0	495.893	454.447	623.0	1134.93	1196.99	582.3299999999999	878.965	475.16999999999996	0.4864952923583321	0.5406017304443294
Cip4	2047.47025	1727.85591983709	984.84790252594	1101.77584	10.95553035	14.525413491	2.52713	6.1444129896	1512.15123004234	1385.22458	1774.04424	2911.47137	1887.6630849185449	1043.31187126297	2342.757805	1448.68790502117	0.5527002565227312	0.6183686175025549
mRpS6	690.0	404.9997	162.2924	145.913	0.0	0.0	0.0	0.0	201.7069	196.0861	352.0	671.0	547.49985	154.1027	511.5	198.8965	0.28146619583548743	0.3888494623655914
CG15019	2251.998	1153.957	499.23	440.9	3.1298	8.33454	0.0	1.04345	654.769	539.1	1032.87	2225.67	1702.9775	470.065	1629.27	596.9345000000001	0.2760253732066337	0.3663815696600318
CG15027	375.979	180.961	48.8603	46.4875	0.0	0.0	1.02071	1.03883	66.1397	57.5125	178.0	320.0	278.47	47.6739	249.0	61.826100000000004	0.1711994110676195	0.2482975903614458
CG1503	120.0	70.00001	6.0	13.0	2.0	1.0	11.0	9.0	42.0	154.0	4.0	2.0	95.000005	9.5	3.0	98.0	0.09999999473684239	32.666666666666664
CG15047	539.0	429.0	146.0	162.0	0.0	0.0	1.0	2.0	503.0	485.0	493.0	844.0	484.0	154.0	668.5	494.0	0.3181818181818182	0.7389678384442783
gd	152.0	165.00044	122.9455	104.4244	0.0	0.0	0.0	0.0	128.05506	90.57564	195.99956	317.9999	158.50022	113.68495	256.99973	109.31535	0.7172542094894253	0.4253520032880968
Ac3	9.0	2.0	2.0	3.17553	0.0	0.0	44.0	51.0937	86.813600802693	93.5266	98.639559141799	166.9751791454	5.5	2.587765	132.8073691435995	90.1701004013465	0.4705027272727273	0.6789540443636757
Pur-alpha	701.999700024855	479.0004117514	273.735825145	223.57905846161	0.0	1.15847	0.0	0.0	338.26459	309.4208	609.0002	1152.84196605	590.5000558881275	248.657441803305	880.921083025	323.842695	0.42109638995599713	0.3676182818646532
CG15073	220.78	179.287	155.217	160.912	0.0	0.0	7.2197	9.71327	293.783	277.088	300.0	443.0	200.0335	158.0645	371.5	285.43550000000005	0.7901901431510222	0.7683324360699867
Cyp12b2	22.0	14.0	10.4559	8.0	0.0	0.0	3.0	0.0	12.5441	6.0	29.0	47.0	18.0	9.22795	38.0	9.27205	0.5126638888888889	0.24400131578947368
Mctp	921.722	889.5095	728.98162	694.363	89.6812	118.5376	51.278400146902	56.490700210987	902.0190149214	852.6365	848.3190393638	1440.467	905.6157499999999	711.67231	1144.3930196819001	877.3277574607	0.7858435655519463	0.7666315176446684
Phb2	8459.59168192	4936.6227	3220.91288957	3378.2646513	916.992480050394	1428.87600175578	911.41023	533.378	3183.089	3171.733	4620.009	7930.126	6698.10719096	3299.588770435	6275.0675	3177.411	0.492615103993594	0.5063548718798643
CG15083	549.0	348.997	62.0	78.0	0.0	1.00104	2.0	1.00274	375.0	329.0	575.0	1004.0	448.99850000000004	70.0	789.5	352.0	0.1559025252868328	0.44585180493983534
CG15084	221.0	169.0	78.926	107.314	0.0	0.0	0.0	0.0	86.074	90.6856	119.0	212.0	195.0	93.12	165.5	88.37979999999999	0.4775384615384616	0.534016918429003
edl	60.0	44.0	10.964	13.8693	1.10224	1.0	0.0	0.0	12.036	2.13075	20.8978	41.0	52.0	12.41665	30.948900000000002	7.083375	0.2387817307692308	0.22887323943661972
Vps51	379.606	424.41	306.496	330.79	1.01499	1.01774	91.393800741253	118.59	561.504	570.2107	612.9846	816.9826	402.00800000000004	318.64300000000003	714.9836	565.85735	0.7926285049053751	0.791427034130573
CG15093	3212.657	1600.434	674.4281	707.2789	0.0	0.0	254.81842	109.26195	797.5727	787.6401	2166.989	4437.983	2406.5455	690.8534999999999	3302.486	792.6064	0.28707269403383395	0.24000295534939436
MFS15	391.861	277.732	126.114	119.3819	0.0	2.21367	1.13941	2.26773	247.886	235.618	292.0	504.786	334.79650000000004	122.74795	398.39300000000003	241.752	0.3666345078278894	0.6068178908765967
MFS14	265.994447	174.01774	14.2905	20.58456	0.0	0.0	28.0054	12.9822	21.7095	8.41545	86.0	144.0	220.0060935	17.43753	115.0	15.062475	0.07925930469739466	0.13097804347826086
CG15096	38.0	47.99999	40.868	33.3227	0.0	0.0	0.0	0.0	46.132	43.6773	38.99998	74.0	42.999995	37.095349999999996	56.49999	44.904650000000004	0.8626826584514719	0.7947727070394173
CG15097	44.1126	16.77362	18.60837	9.66942	1.31115	1.14049	6.88728	2.22639	12.3916	19.3306	36.6889	51.8595	30.44311	14.138895000000002	44.27419999999999	15.8611	0.4644366163640969	0.35824701519169183
CG15098	6825.74	3496.76	1927.49	1910.28	7.0	7.00433	37.2612	32.2381	1378.45	1236.69	1744.0	3218.97	5161.25	1918.885	2481.4849999999997	1307.5700000000002	0.3717868733349479	0.526930446889665
CG15099	2202.08432	2142.3348	1264.220542142	1661.84981	7.217721384	8.24662	39.9207	32.6645	1873.78	2279.15	2223.78	3438.75	2172.2095600000002	1463.035176071	2831.2650000000003	2076.465	0.6735239559810242	0.7334053859317301
MetRS	2045.84	2214.92	1517.25	1556.82	3.10688	6.23934	3.15859	2.08174	1915.75	1917.18	2288.89	3577.76	2130.38	1537.0349999999999	2933.325	1916.4650000000001	0.7214839606079666	0.6533421969948779
Jheh1	449.542	191.011	39.386	52.206	0.0	0.0	3.32655	3.3698	133.308	118.856	178.975	309.967	320.2765	45.79600000000001	244.471	126.082	0.1429889486115903	0.5157339725366199
Jheh2	2981.34811	1380.0056	1217.6311	1166.5482	5.26727	3.69855	1.04917	1.00144	1019.94	881.821	1644.95	2505.94	2180.6768549999997	1192.08965	2075.445	950.8805	0.5466603854058881	0.4581574072066472
Topors	1218.8358	1476.93	944.4	1068.7929	4.02283	6.04087	12.1622	7.0735	1005.6	1047.2	1275.98	1987.96	1347.8829	1006.59645	1631.97	1026.4	0.7467981454472046	0.6289331298982213
tn	136.78731	53.62632	96.89368	92.97117	0.0	0.0	12.2127	11.3736	144.106373	139.02882	72.99998	169.99953	95.20681499999999	94.932425	121.499755	141.56759649999998	0.9971179584150568	1.1651677528074027
Jheh3	1705.31	1195.41	271.389	208.966	0.0	0.0	195.273	138.518	338.611	223.085	785.975	1624.99	1450.3600000000001	240.1775	1205.4825	280.848	0.16559854105187677	0.2329755927605751
CG15107	858.997	588.0	435.0	487.882	1.00342127539	5.00449243667	1.00228	0.0	536.0001	562.1179	604.9965	1144.9917	723.4984999999999	461.44100000000003	874.9941	549.059	0.6377912324628179	0.6275002311444157
Eph	1906.945303629	1871.99958	1222.8125	1307.9832	2.12172	3.17012	1.0599392984349	0.0	1670.188	1645.0169	2268.8790621788	3652.8270149831	1889.4724418145	1265.3978499999998	2960.85303858095	1657.60245	0.6697096088815203	0.5598394882828904
botv	262.818	399.91	326.412	291.787	0.0	0.0	6.18172	4.09005	371.588	343.213	432.0	526.0	331.36400000000003	309.0995	479.0	357.4005	0.9328095387549642	0.7461388308977036
CG15111	951.295	617.747	381.58	415.061	1.13502	7.79463	23.7047	29.2538	405.42	340.939	398.865	647.206	784.521	398.3205	523.0355	373.1795	0.5077244586186985	0.7134878990049434
ena	1725.47371	1926.416993	1405.11903	1455.85823	7.63604	6.72797	44.5296	36.5854	1819.8813	1843.14297	2177.3635	3618.2657	1825.9453515	1430.48863	2897.8145999999997	1831.512135	0.7834235722470362	0.6320321993684482
CG15117	126.8607	42.53158	31.078193532	53.257700185782	2.20654	3.3189682325	22.1393	5.46839	31.92187	43.7424	43.7935	90.68102082	84.69614	42.167946858891	67.23726041	37.832135	0.4978733016509489	0.5626662176493636
CG15118	1432.4887	1190.7086	724.3160389	794.2374	3.05227	4.10113	51.5104	49.291	969.68463	936.763	1139.9499	1795.9	1311.59865	759.27671945	1467.92495	953.2238150000001	0.5788940995402824	0.6493682221287949
mip40	1249.0	877.0	477.0	426.0	1.0	3.0	3.00215	0.0	443.0	381.0	525.0	733.0	1063.0	451.5	629.0	412.0	0.4247412982126058	0.6550079491255962
Cul2	2099.89	2187.798	1909.983	2047.997	4.39701	5.44363	1.1054	2.20052	2184.013	2109.995	2254.606	3286.557	2143.844	1978.99	2770.5815000000002	2147.004	0.923103546713287	0.7749290176087582
CG1513	1795.9876	1607.15	1138.35212	1082.49073	3.44029	2.31024	4.575	5.84527	1112.539	1241.514	1595.561	2951.198	1701.5688	1110.421425	2273.3795	1177.0265	0.6525868510282982	0.5177430780914493
CG15130	3.0	0.0	0.0	0.0	0.0	1.00908	0.0	0.0	346.699	329.282	445.119	846.543	1.5	0.0	645.831	337.9905	0.0	0.5233420198163297
beat-IIIc	97.53729	37.6508	93.2779	95.4023	1.30339	0.0	2.46275	2.34922	70.7221000491457	79.5977	11.6966000273642	18.0000000103362	67.594045	94.3401	14.8483000188502	75.15990002457285	1.3956865578913056	5.061852193796995
snz	1842.01281823	1651.0847	506.9213	599.954	1.06177	3.16779	50.9887	42.9124	320.49	301.005	1030.4	2021.19	1746.548759115	553.43765	1525.795	310.7475	0.3168750068451764	0.2036626807664201
CG15141	1169.04	972.346	695.611	755.318	1.09057	0.0	1.08864	1.0941	933.992	892.173	987.358	1689.77	1070.693	725.4645	1338.5639999999999	913.0825	0.6775653712128501	0.6821358560367679
btv	21.0	19.0	10.4689	4.50839	0.0	0.0	0.0	0.0	6.5311	7.49161	15.0	24.0	20.0	7.488645	19.5	7.011355	0.37443225	0.3595566666666667
Ykt6	1351.0	909.0	848.443	782.12	158.497	242.61	0.0	0.0	769.557	661.88	855.503	1456.39	1130.0	815.2815	1155.9465	715.7185	0.7214880530973452	0.6191623055219251
Socs36E	448.944	288.0	151.1694	124.1337	90.4543	218.896	1.05678	0.0	27.8307	31.8664	205.546	499.104	368.472	137.65155	352.325	29.84855	0.37357397577020773	0.0847187965656709
CG15155	6.9999983	14.000043	7.0	11.000014	0.0	2.0000039	0.0	1.0	9.0	18.0	13.0	25.0	10.50002065	9.000007	19.0	13.5	0.8571418380972422	0.7105263157894737
PCB	4058.4546228	3313.4415	1767.3321	1748.64743110358	10.845832287	16.2775197131	241.5402110211	219.556	2036.67159772	2144.35035024194	2774.15720041697	4115.718	3685.9480614	1757.98976555179	3444.937600208485	2090.51097398097	0.4769437160446772	0.6068356575905625
CG15160	1147.0	1440.0	997.363	908.04600062905	25.208416	32.020374	0.0	0.0	1232.64	1205.949	1285.79104	1849.984	1293.5	952.704500314525	1567.88752	1219.2945	0.7365322770116158	0.7776670739747963
MESR3	931.001	810.9996	499.6071	505.6101	0.0	0.0	0.0	0.0	273.3925426	280.39	335.9999	590.001	871.0002999999999	502.6086	463.00045	276.89127129999997	0.5770475624405641	0.598036721778564
EMC5	822.0	467.0	287.0	336.507	0.0	0.0	0.0	0.0	428.0	353.493	534.0	862.0	644.5	311.75350000000003	698.0	390.74649999999997	0.4837137315748643	0.5598087392550143
Ttc19	263.0	162.0	54.8111	29.9075	0.0	0.0	0.0	0.0	61.1889	81.0925	105.0	149.083	212.5	42.359300000000005	127.0415	71.1407	0.1993378823529412	0.5599800065332982
Stt3A	4755.481	3422.09	2058.91	2227.6203	2.14879	3.233	145.515	104.907	2559.09	2530.38	3717.85	6008.77	4088.7855	2143.26515	4863.31	2544.735	0.5241813614336092	0.5232516537090993
CG15186	39.9747123882	27.999960468781	24.7134671660524	18.9371404156864	1.43186	0.0	1.02529	0.0	31.2866	41.06283	5.568134862	28.0	33.9873364284905	21.8253037908694	16.784067431	36.174715	0.6421598773057703	2.1553008618867717
Prosalpha7	4688.95	3091.96	1901.37	2028.74	1.07522	10.6765	3.05391	3.04312	2174.63	2122.26	2565.92	4475.32	3890.455	1965.0549999999998	3520.62	2148.445	0.50509644758775	0.6102462066340588
e(y)2	275.0	197.0	92.0	112.326	0.0	0.0	0.0	0.0	235.0	238.674	365.0	537.0	236.0	102.163	451.0	236.837	0.43289406779661016	0.5251374722838137
WASp	1255.0023	973.91891	730.62383	775.1561	7.79878	16.97483	0.0	1.08153	897.376	823.844	1013.2	1894.03	1114.460605	752.8899650000001	1453.615	860.61	0.6755644494046518	0.592048100769461
CG15209	47.7293	22.5197	9.0	13.8533	1.0	1.0	1.97686	0.0	20.4502	14.8357	44.1813	80.6294	35.1245	11.42665	62.40535	17.64295	0.3253185098720267	0.28271534411713095
CG15210	45.2902	19.5981	17.1152	17.5525	0.0	0.0	10.7098	5.40188	14.8848	18.4475	11.0	24.0	32.44415	17.333849999999998	17.5	16.666150000000002	0.5342673486591573	0.9523514285714286
CG15211	14.999957	15.0	4.0	14.0	2.0	2.0	0.0	0.0	10.0	11.0	13.0	42.0	14.999978500000001	9.0	27.5	10.5	0.6000008600012326	0.38181818181818183
CycK	2812.931	1881.711	1242.254	1334.1345	9.13896	15.0632	0.0	1.03204	1069.49	937.643	1299.91	2155.85	2347.321	1288.19425	1727.88	1003.5665	0.5487933904225285	0.5808079843507651
CG15219	18.0	12.0	15.0	15.0	16.0	22.7306	0.0	0.0	0.0	0.0	0.0	2.26943	15.0	15.0	1.134715	0.0	1.0	0.0
RPA3	1527.0	945.0	613.779	634.487	1.04817	2.14387	0.0	0.0	895.221	764.512	940.952	1502.86	1236.0	624.133	1221.906	829.8665	0.5049619741100324	0.679157398359612
CG15221	131.0	43.0	14.0	16.0	0.0	0.0	0.0	0.0	3.0	8.0	10.0	13.0	87.0	15.0	11.5	5.5	0.1724137931034483	0.4782608695652174
CkIIbeta	4278.1768	2661.7069	1803.3619	1926.9657	21.3728	101.78579	101.81684	55.40016	1979.0256	1849.1059	2100.0289	3962.5117	3469.94185	1865.1638	3031.2703	1914.06575	0.5375201892792526	0.6314401424379739
CG1523	1043.86	989.879	577.782	659.749	1.10771	1.09165	2.13688	2.12073	745.218	628.251	1008.89	1566.91	1016.8695	618.7655	1287.9	686.7345	0.6085004024606894	0.5332203587235034
CG15237	492.329	300.842	206.214	208.818	0.0	0.0	0.0	1.0	260.635	243.92	298.357	494.653	396.5855	207.51600000000002	396.505	252.27749999999997	0.523256649574934	0.6362530106808236
RpS14a	18649.374	8667.664	2753.184	2934.306	100.627	184.897	8.51842	7.61452	5595.15	5449.41	13104.0	28509.5	13658.519	2843.745	20806.75	5522.28	0.20820302698996868	0.2654081007365398
UK114	934.999	494.0	331.0	450.0	0.0	0.0	1.00106	0.0	477.0	450.0	693.0	1176.0	714.4995	390.5	934.5	463.5	0.5465364216490004	0.4959871589085072
Uxt	368.58	293.499	186.0037	175.6264	0.0	2.0	0.0	2.0	127.0	107.0	154.0	221.0	331.0395	180.81504999999999	187.5	117.0	0.5462038518062043	0.624
dao	369.2696	326.8362	48.7322	23.7338	0.0	0.0	19.7303	28.164	75.2678	15.26619	465.0002	740.9998	348.0529	36.233	603.0	45.266994999999994	0.1041019913926877	0.07506964344941956
RpS14b	26653.138	10474.719	3529.5838	4087.7063	5.33166	17.5939	0.0	1.00046	1175.09	1212.58	3436.08	7386.98	18563.928499999998	3808.64505	5411.53	1193.835	0.20516374268517573	0.22060951339085252
CG15279	68.92809	73.91606	74.5835	91.8206	0.0	0.0	1.07197	1.08395	92.4165	130.1793	127.999700110013	186.9997	71.422075	83.20205	157.49970005500649	111.2979	1.1649346508064908	0.7066546790954484
gammaCOP	2175.819	1930.941	1148.469	1235.7981	6.37527	2.09745	22.1816	20.06	1709.532	1606.201	2258.629	3034.904	2053.38	1192.13355	2646.7664999999997	1657.8665	0.5805713263010256	0.626374294823514
CG1529	882.998	853.993	574.798	651.915	2.003029	3.0025394	1.00143	4.00609	697.202	635.085	768.997	1372.0	868.4955	613.3565	1070.4985	666.1435	0.7062287599647896	0.6222741087446644
Neb-cGP	2710.8639	1363.8919	579.55399	645.94598	0.0	1.09976	2.13378	1.10572	628.446	571.054	1112.0	2288.9	2037.3779	612.7499849999999	1700.45	599.75	0.3007542120683649	0.3527007556823194
Ypel	972.37579	753.1327	380.6672	405.52683	121.0	224.0	1.0	0.0	147.00026	202.90967	268.9998	481.00000465327	862.7542450000001	393.097015	374.99990232663504	174.95496500000002	0.45563034581185974	0.4665466948511616
CG15312	1350.72800055673	1058.0011	682.7997993086	669.3473	0.0	1.31853	1.27259	0.0	457.2001	428.65272	989.99996	1770.6815	1204.364550278365	676.0735496543	1380.34073	442.92641000000003	0.5613529138648584	0.3208819390557287
CG15317	388.0	211.0	162.0	164.0	0.0	0.0	0.0	0.0	134.0	98.0	240.0	438.0	299.5	163.0	339.0	116.0	0.5442404006677797	0.3421828908554572
nej	8264.331	5849.23	3920.42384	5476.11	47.923	104.892	8.885478208	4.469727506	5110.4757	6546.964305	6499.3685	14376.7188047057	7056.7805	4698.26692	10438.04365235285	5828.7200025	0.6657805099648487	0.5584111541041642
CG1532	1567.0	1255.997	824.234	833.619	0.0	2.00958	0.0	2.00313	518.767	510.381	558.0	1145.99	1411.4985000000001	828.9265	851.995	514.5740000000001	0.5872670073684102	0.6039636382842624
Ir7c	231.0002	138.0	44.0	21.0	0.0	1.0	0.0	0.0	42.0	18.0	110.0	66.0000000241598	184.5001	32.5	88.00000001207991	30.0	0.17615166604245744	0.34090909086229376
hdm	13.0	9.0	1.0	1.0	0.0	0.0	1.00301	0.0	53.5189	38.4574	24.5424	43.6385	11.0	1.0	34.090450000000004	45.988150000000005	0.09090909090909091	1.3490038999191856
CG15343	39.0914	26.5926	15.3133	15.8371	0.0	0.0	0.0	0.0	29.4474	25.9436	10.7996	18.7044	32.842	15.575199999999999	14.751999999999999	27.6955	0.4742463918153584	1.877406453362256
CG15347	420.9999	175.0005	108.0	82.99995	2.0	0.0	0.0	0.0	32.0	22.00001	46.0	177.0004	298.0002	95.499975	111.5002	27.000005	0.3204694996848996	0.24215207685726126
Cp7Fb	6002.66	2668.027	456.483	812.545	1.15283	0.0	4.34433	4.9721	582.517	1050.456	432.847	1432.0	4335.3435	634.514	932.4235	816.4865	0.14635841427559315	0.8756605769803099
Cp7Fc	5032.98	1951.0	304.0	403.486	0.0	1.00141	36.0217	12.0047	416.0	558.514	292.0	926.999	3491.99	353.743	609.4995	487.257	0.10130126374932345	0.7994378994568494
CG15353	19.0	8.0	22.0	18.0	0.0	1.0	0.0	0.0	63.0	55.0	28.0	28.0	13.5	20.0	28.0	59.0	1.4814814814814814	2.107142857142857
CG15356	1581.47	1578.53	1303.77	1564.33	3.10279	1.15506	16.5301	16.6284	1367.23	1311.67	1408.9	2196.96	1580.0	1434.05	1802.93	1339.45	0.907626582278481	0.7429295646530925
CG15362	325.0	207.0	161.656	151.506	1.00502	2.0	0.0	0.0	140.344	158.494	212.995	347.0	266.0	156.58100000000002	279.9975	149.41899999999998	0.5886503759398497	0.533644050393307
CG15365	76.0	57.8002	74.8569971	52.54670137619	0.0	1.06086	2.000002204	1.19982	108.64500187343	72.8327	139.0	286.9387	66.9001	63.701849238095	212.96935	90.73885093671501	0.9521936325669917	0.426065304405141
Dlip1	174.0003	126.0002	107.0	106.0	0.0	0.0	0.0	0.0	115.0	84.0	159.0	204.0	150.00025	106.5	181.5	99.5	0.709998816668639	0.5482093663911846
CG15385	45.999991539	11.92342	8.0	4.0	0.0	0.0	0.0	1.07657	9.0	8.0	31.0	64.0	28.9617057695	6.0	47.5	8.5	0.20717011793962387	0.17894736842105263
CG15387	283.0	252.776	191.18	168.858	1.20284	1.18788	0.0	1.22379	227.82	244.14261	250.79762	437.8121	267.88800000000003	180.019	344.30485999999996	235.981305	0.6719935196798662	0.685384763375109
tmod	1163.50067	983.99989	555.8625	543.7685175	17.03795	54.07478	1.49952	0.0	492.138	443.231231063	965.9627	1915.6578082235	1073.75028	549.8155087499999	1440.81025411175	467.68461553149996	0.51205156263149	0.3245983391614772
CG15390	243.0	129.0	112.0	104.0	0.0	0.0	0.0	1.0	153.0	149.0	205.0	309.0	186.0	108.0	257.0	151.0	0.5806451612903226	0.5875486381322957
CG15406	22.0	48.0	8.0	11.0	0.0	1.07625	0.0	0.0	4.0	22.0	33.0	56.9238	35.0	9.5	44.9619	13.0	0.2714285714285714	0.28913368874535994
Spindly	643.39	652.324	587.265	575.861	1.02907	0.0	87.4973	72.7526	962.857	995.352	802.971	1272.0	647.857	581.563	1037.4855	979.1044999999999	0.8976718627721859	0.9437283701796313
CG15418	74.1425	14.743	5.0	8.0	1.0	1.0	0.0	1.0	16.0	21.0	11.0	39.0	44.44275	6.5	25.0	18.5	0.14625557599383476	0.74
CG1542	2926.0	1578.85	698.446	755.061	3.13429	1.04372	0.0	3.1496	919.554	772.939	1344.87	2377.96	2252.425	726.7535	1861.415	846.2465	0.32265380645304503	0.45462537907989353
tutl	240.6642	95.222345095	50.6567741313265	39.1136	11.3604	33.5421	27.23954	0.614302	58.75379	58.908039	145.957607	283.265100072052	167.9432725475	44.885187065663246	214.611353536026	58.830914500000006	0.2672639777992191	0.2741276895685031
Tbh	6.0	0.0	1.023512	0.0	1.128882	0.0	0.0	0.0	42.9765001359693	21.0000001733008	25.8711	99.0	3.0	0.511756	62.43555	31.988250154635054	0.17058533333333334	0.5123403278202091
CG15431	36.9298	14.7806	22.7021	27.8364	3.72509	1.34938	0.0	0.0	12.4587551587	18.163644779	20.2749	12.4587493382	25.8552	25.26925	16.366824669099998	15.31119996885	0.9773372474395866	0.9355021684662522
CG15432	145.568	99.4181	61.0682	48.3486	0.0	0.0	50.9999637	29.000018	205.2248	157.437262	220.1078	416.64902	122.49305000000001	54.7084	318.37841000000003	181.331031	0.4466245227790474	0.5695456265391864
Elp3	1598.13	1260.13	666.933	658.664	0.0	1.11716	14.8717	14.4521	552.067	541.796	950.124	1652.06	1429.13	662.7985	1301.092	546.9315	0.4637776129533352	0.4203634331776692
CG15435	562.992	670.983	470.201	476.0	0.0	1.00221	5.00825	3.01675	633.004	574.987	638.591	1011.69	616.9875	473.1005	825.1405	603.9955	0.7667910614072408	0.731991097273737
Paris	302.0	305.0	231.533	238.0	0.0	0.0	0.0	0.0	211.467	220.0	230.0	407.0	303.5	234.7665	318.5	215.7335	0.7735304777594728	0.677342229199372
morgue	723.059	640.961	474.367	516.988	0.0	0.0	8.37318	9.62074	628.34	627.226	659.892	1167.35	682.01	495.6775	913.621	627.783	0.7267891966393455	0.6871372264866942
MFS18	975.989	908.894	622.166	677.533	2.1457	2.16036	17.011195628	8.527034311	686.8347	636.0067	818.7305	1269.657	942.4415	649.8495	1044.19375	661.4207	0.6895382896445031	0.63342717766698
CG15439	765.0	958.948	675.582	725.195	0.0	4.10674	0.0	0.0	787.98	803.452	1004.25	1341.63	861.9739999999999	700.3885	1172.94	795.716	0.8125401694250639	0.6783944617798011
CG1544	12.0	12.0	9.20649	3.43659	0.0	0.0	0.0	0.0	18.7935058551	11.56340736129	404.0000936926	758.000107045	12.0	6.321540000000001	581.0001003688001	15.178456608195	0.526795	0.02612470565592021
Secp43	454.0	307.0	140.0	166.0	2.0	0.0	0.0	0.0	196.0	132.0	257.0	400.0	380.5	153.0	328.5	164.0	0.4021024967148489	0.4992389649923896
Gs1l	890.812	547.888	319.4633	312.3893	0.0	0.0	6.188357	3.11109	414.5365	338.6107	621.0	978.0	719.35	315.92629999999997	799.5	376.5736	0.43918301244178765	0.47101138211382115
RpL27A	51001.4744	25622.42418684	9462.2	9900.9841	2323.9381	5738.60263	90.5106	38.5568	9259.8012	8740.0233	24403.087	48168.35102903	38311.949293419995	9681.59205	36285.719014514994	8999.912250000001	0.2527042405452023	0.24802904543244303
CG15443	348.779	311.5613	240.79565	232.9332	2.00877	0.0	87.221	66.4387	287.999	344.08	322.4	535.305	330.17015000000004	236.86442499999998	428.85249999999996	316.0395	0.717401088499369	0.7369421887478795
ine	10.87396984	3.999999874	11.70160421	8.00000319	0.0	1.05211	1.12603	0.0	27.2984	21.000028	6.0	28.9479	7.436984857000001	9.8508037	17.473950000000002	24.149214	1.3245695519640615	1.3820123097525172
CG15445	1631.353	1053.7465	217.0	246.0	11.0	20.0	1.000000283936	2.00192937063	868.9999	761.9995	1183.0038	2123.0	1342.5497500000001	231.5	1653.0019	815.4997000000001	0.17243308860621365	0.4933446839958261
CG15456	153.0003	102.0	49.99997	40.73912	0.0	0.0	0.0	0.0	21.0	18.2609	15.0	47.0	127.50015	45.369545	31.0	19.63045	0.35583914999315686	0.6332403225806451
Obp19c	2444.00159	942.0	180.355	170.682	0.0	1.09473	0.0	0.0	154.645	169.318	133.0	365.905	1693.000795	175.5185	249.4525	161.9815	0.10367301688124723	0.6493480722782895
cathD	6771.607225383	4005.445958161	2333.020271481	2303.05825347	9.38609	16.7679	5.39052	6.55431	3194.98	3255.94	5035.61	7914.23	5388.526591772	2318.0392624755	6474.92	3225.46	0.43018053692358604	0.4981466952487444
Ski6	2584.004	1232.000362155	547.03	517.0705	1.0687626211	3.1441466504	0.0	0.0	121.97	88.9295	312.931	566.856	1908.0021810775	532.05025	439.8935	105.44975	0.2788520135231381	0.2397165450273759
CG15482	12.0	2.0	0.0	7.0	4.0	2.0	0.0	0.0	245.061	250.765	271.868	574.267	7.0	3.5	423.0675	247.913	0.5	0.5859892333965621
CG15484	36.0	24.0	6.0	0.0	0.0	0.0	0.0	0.0	9.0	8.0	9.0	36.0	30.0	3.0	22.5	8.5	0.1	0.37777777777777777
TTLL12	1052.95	812.0	220.739	217.161	2.0244	2.02879	3.05081	0.0	499.261	480.839	1271.98	2377.97	932.475	218.95	1824.975	490.05	0.2348052226601249	0.2685242263592652
CG15514	1375.966	958.0	695.572	750.792	0.0	0.0	1.03437	0.0	930.428	932.208	914.0	1522.0	1166.983	723.182	1218.0	931.318	0.6197022578735081	0.7646288998357964
Vps13B	852.155	781.885293	415.342	654.231	19.311	15.338	27.84490423	26.1151022863	541.6582	641.7685391	758.68880230191	1313.6635529	817.0201465	534.7864999999999	1036.176177600955	591.7133695499999	0.6545572986063446	0.57105479004544
Sas-6	446.54	363.014	312.914	369.108	0.0	0.0	16.4596	23.9864	459.086	443.892	388.0	759.0	404.77700000000004	341.01099999999997	573.5	451.48900000000003	0.8424663456668732	0.7872519616390584
CG15525	203.463	154.0	81.4351	64.8081	0.0	0.0	2.53687	0.0	191.565	168.192	200.0	367.0	178.73149999999998	73.1216	283.5	179.8785	0.40911423000422426	0.6344920634920636
CG15529	271.068000076078	123.04203	2.62812	7.0	0.0	1.07448	24.8097	10.5322	7.72307	5.0	167.402	429.629	197.05501503803902	4.81406	298.5155	6.361535	0.024430030360154526	0.021310568462944136
Nop17l	2189.3295	2503.7845	1444.82822	1582.1232	6.0332916	7.8620694	3.454754	4.009444	2000.429	1980.5635	3073.522	5299.851	2346.557	1513.4757100000002	4186.6865	1990.4962500000001	0.6449771772004688	0.4754347501299656
heca	2641.4034	2939.88800047031	1952.494	2095.873	12.6293	12.65882	65.5961	60.1086	3342.51	2980.13	3912.37	6834.34	2790.6457002351553	2024.1835	5373.355	3161.32	0.7253459297356992	0.5883326152841196
CG15535	354.997	223.0	167.9996	144.0002	0.0	0.0	1.00365	0.0	174.0	134.0	251.0	410.0	288.99850000000004	155.9999	330.5	154.0	0.5397948432258298	0.4659606656580938
CG15536	256.725	158.0	110.608	101.683	1.162	0.0	2.27473	0.0	99.3924	82.3165	97.838	176.0	207.3625	106.1455	136.91899999999998	90.85445	0.5118837784073783	0.6635634937444768
Polr2A	4486.53	4662.27	3210.36	3768.83	5.64913	8.98032	4.46662	6.73093	4196.64	4635.17	5236.35	8700.02	4574.4	3489.5950000000003	6968.185	4415.905000000001	0.762853051766352	0.6337238463100506
CG15547	245.0	130.0	44.7469	37.5915	8.14239	8.20783	0.0	0.0	14.2531	24.4085	99.8576	140.792	187.5	41.169200000000004	120.32480000000001	19.3308	0.21956906666666667	0.1606551600335093
CG15561	579.0	336.0	140.0	120.0	0.0	2.0	0.0	0.0	209.0	148.0	338.0	696.0	457.5	130.0	517.0	178.5	0.28415300546448086	0.3452611218568665
CG15570	9160.56	3486.69	287.02	1258.71	0.0	5.13242	146.436	63.3078	305.9793	1224.29	423.000125	959.868	6323.625	772.865	691.4340625	765.13465	0.12221866413647235	1.1065909122751671
CG15571	505.996	157.0	4.0	41.0	0.0	0.0	2.00429	2.0	9.0	64.0	24.0	5.0	331.498	22.5	14.5	36.5	0.06787371266191651	2.5172413793103448
Femcoat	2222.87	726.0	85.9819	369.806	0.0	1.08188	1.13184	0.0	84.0181	294.194	101.0	88.9181	1474.435	227.89395	94.95904999999999	189.10605	0.15456357859112135	1.9914484190816992
Kmn1	291.0168	219.4184	182.4138	212.4854	0.0	0.0	0.0	0.0	158.46854	155.4104	175.00008	283.9996	255.2176	197.4496	229.49984	156.93947	0.773651973845064	0.6838325900357926
Osi24	1.0	2.0	34.2952	30.0	3.38275	5.06962	0.0	0.0	22.7048	12.0	20.6173	3.93038	1.5	32.1476	12.27384	17.3524	21.43173333333333	1.4137710773482464
Upf1	2775.79	2311.595	1488.3484	1719.9485	4.13105	5.18435	28.21324380868	37.40941622152	1573.654	1574.051	2428.8648	3870.819	2543.6925	1604.1484500000001	3149.8419	1573.8525	0.6306377244891039	0.4996607924988235
mys	2507.418	2351.7814	1291.5508	1403.4017	3.0621403	7.18672	92.582259003072	67.2166901623436	1797.450159464	1781.602	2750.937	4537.807	2429.5996999999998	1347.47625	3644.372	1789.5260797320002	0.5546083373322774	0.49103825836989207
CG15601	256.0001	167.9996	137.9999	144.0001	0.0	0.0	0.0	0.0	136.99998	116.0	151.9999	191.0	211.99984999999998	141.0	171.49995	126.49999	0.6650948102085922	0.7376094861835236
CG15602	462.0004	339.0001	264.4058	231.4833	0.0	0.0	0.0	0.0	329.594	276.516	345.0	640.0	400.50025	247.94455	492.5	303.055	0.6190871291590954	0.6153401015228427
Ehbp1	759.3131	600.672	374.3246	374.2177	0.0	2.69803	60.6872	27.3275	405.675710016876	341.7815246	605.0001	1055.3014	679.9925499999999	374.27115	830.15075	373.728617308438	0.550404780170018	0.45019367543598315
pkm	31.1223	15.1099	14.0571	12.0614	1.06547	0.0	0.0	0.0	18.4352	10.1688	15.3925	41.5948	23.1161	13.05925	28.49365	14.302	0.5649417505548081	0.5019363963549773
CG15611	209.7937	96.9171	20.46565	12.37725	1.05619	0.0	5.20593	1.08294	24.5344	21.6228	150.944	320.0001	153.3554	16.42145	235.47204999999997	23.0786	0.10708100269048237	0.09800993366303985
THADA	612.953	369.976	86.9026	84.9313	0.0	0.0	2.04675	1.0238539895	106.097770874	95.068725	492.0005	929.99950523552	491.4645	85.91695	711.00000261776	100.58324793700001	0.17481822186546536	0.14146729615565765
tank	785.085	795.882	431.2476	409.2415	9.90871	7.78867	18.91429	22.11773	526.7523	473.759	731.091	1110.212	790.4835	420.24455	920.6514999999999	500.25565	0.531629755712801	0.5433713517003992
CG15629	42.5469	23.1096	14.3841	14.3795	0.0	0.0	0.0	0.0	7.39979	10.0349	5.3484	3.70565	32.82825	14.3818	4.527025	8.717345	0.4380921919383458	1.925623339831346
Taf12L	19.0	17.0	14.2025	7.0	0.0	1.0	0.0	0.0	39.7975	54.0	3.0	1.0	18.0	10.60125	2.0	46.89875	0.5889583333333334	23.449375
CG15642	23.97815173	19.5543	12.10216	19.30209	0.0	0.0	1.07035	3.54641	2.54788	10.6349	21.1585	46.2623	21.766225865000003	15.702124999999999	33.7104	6.5913900000000005	0.7213986061427833	0.19552986615406523
CG15643	72.9654	129.77500628927	89.6557000169354	106.301	0.0	0.0	8.03464	19.2255	262.344	240.699	235.0	396.0	101.37020314463501	97.9783500084677	315.5	251.5215	0.9665399394403125	0.7972155309033281
cerv	381.9997	226.9996	165.00012	152.0	0.0	0.0	0.0	0.0	644.478	529.346	781.185	1352.6	304.49965	158.50006000000002	1066.8925	586.912	0.5205262469103004	0.5501135306509326
CG15653	189.35	172.875	71.454	70.7248	0.0	0.0	0.0	0.0	106.785	91.7099	130.92	268.216	181.1125	71.0894	199.56799999999998	99.24745	0.3925151494237007	0.4973114427162672
CG15657	30.0589	43.6437	38.1658	25.6173	6.0	1.0	0.0	0.0	0.0	1.0	0.0	3.0	36.8513	31.89155	1.5	0.5	0.865411803654145	0.3333333333333333
Lapsyn	251.048	98.606	41.9348	45.6255	0.0	0.0	19.9519	14.394	48.0652	55.3745	86.0	190.0	174.827	43.780150000000006	138.0	51.719849999999994	0.25041984361683267	0.3747815217391304
Sara	991.64	1297.28	807.069	847.172	1.01423	2.02767	16.3601	29.7228	1116.9308123	1193.831	1642.988	2283.977	1144.46	827.1205	1963.4825	1155.38090615	0.7227168271499222	0.5884345320877574
cv-2	124.407	81.6727	45.6498	41.8581	0.0	0.0	5.59307	2.32728	30.3502	26.1419	19.0	42.0	103.03985	43.75395	30.5	28.24605	0.4246313440867781	0.9261
CG15673	169.0	70.0	11.4876	21.5766	1.05757	0.0	0.0	0.0	12.5124	16.4234	17.9424	26.0	119.5	16.5321	21.9712	14.4679	0.1383439330543933	0.6584938464899505
rod	1410.68	1804.66	1413.27	1851.91	2.09567	4.19166	8.32262	10.3414	2038.73	2211.09	1915.9	2823.81	1607.67	1632.5900000000001	2369.855	2124.91	1.0155006935502933	0.8966413556947577
RpS20	34251.2	15367.7	5675.86	6089.42	12.5337	56.5463	110.844	25.3484	5683.14	4956.58	15750.5	31802.5	24809.449999999997	5882.639999999999	23776.5	5319.860000000001	0.237112874328129	0.2237444535570837
RpS30	34270.712	15342.6059	5862.872	6207.871	17.2256	24.3714	60.2429	35.3933	6424.13	6039.13	13584.8	28701.6	24806.65895	6035.3715	21143.199999999997	6231.63	0.2432964274699314	0.29473447727874685
CG15706	289.6658	230.98158	108.1758	112.957534169	0.0	0.0	10.0	0.0	136.7239	167.0292	205.9999	355.8992	260.32369	110.5666670845	280.94955	151.87655	0.4247276422844959	0.5405829979083434
krimp	1588.0	1746.0	1195.0	1500.0	1.00063	3.0	3.00195	1.0	1562.0	1563.0	1540.0	2590.0	1667.0	1347.5	2065.0	1562.5	0.8083383323335332	0.7566585956416465
CG15715	1772.311	1001.519	566.117	502.5	0.0	2.09432	230.396	120.345	791.05	621.52	901.372	1665.9	1386.915	534.3085	1283.636	706.285	0.38524963678379714	0.550222181366057
CG1572	483.9134	268.0001	258.72	235.2758	3.26773	0.0	1.086441106	0.0	248.28	177.724	190.732	395.0	375.95675	246.99790000000002	292.866	213.002	0.6569848792447536	0.727301905991136
CG15721	906.27	522.47	235.544	473.351	0.0	1.0	0.0	0.0	339.313	559.007	288.902	277.711	714.37	354.4475	283.3065	449.15999999999997	0.49616795218164256	1.585420736905083
Aven	343.945	232.943	176.836	216.612	1.03116	0.0	10.0551	7.05728	254.164	204.388	228.969	377.0	288.444	196.724	302.9845	229.276	0.6820180000277349	0.7567251790108075
Lsm12a	2973.0	1834.45	1180.61	1245.97	0.0	2.26737	7.99968	4.55125	1211.39	1173.03	1598.0	3018.73	2403.725	1213.29	2308.365	1192.21	0.5047540796056121	0.516473781226106
Chrac-16	573.704	406.744425	320.005	371.0	9.4104	32.1505	6.01044	5.0	461.0	359.0	441.0	772.0	490.22421249999996	345.5025	606.5	410.0	0.7047846499421936	0.6760098928277
wisp	19255.02020514	14897.9228754584	11257.62991225	13144.12033	1224.238	2338.127	1.010994	3.03141	10669.35	10653.85	11265.77	20857.83	17076.4715402992	12200.875121125	16061.800000000001	10661.6	0.7144845521706193	0.6637861260879852
sicily	877.0	484.0	292.0	263.555	0.0	0.0	0.0	0.0	276.0	216.445	358.0	634.0	680.5	277.77750000000003	496.0	246.2225	0.4081961792799413	0.4964163306451613
CG15739	32.99998	19.99999	4.0	6.0	1.0	2.0	0.0	0.0	23.0	6.0	71.8906	158.929	26.499985000000002	5.0	115.4098	14.5	0.1886793520826521	0.12563924380771824
CG15743	797.83192	594.96	417.47308	449.0003	2.00403	1.00134	37.1685	26.0402	486.527	476.0	593.996	898.999	696.3959600000001	433.23668999999995	746.4975	481.2635	0.6221125837662813	0.6446953941573818
Remo	1071.4	1267.71	722.514	810.629	0.0	4.19082	12.6044	19.2885	1471.49	1452.71	1841.0	2851.81	1169.555	766.5715	2346.4049999999997	1462.1	0.655438606991548	0.6231234590788888
CG15747	562.973	383.974	333.627	355.9996	41.0	73.0588	8.02779	5.02562	363.374	321.0	356.0	568.941	473.47349999999994	344.8133	462.4705	342.187	0.7282631446110501	0.7399109781056306
CG1575	1303.0	1099.995	663.988	705.1391	0.0	1.00238	2.0	3.00531	696.012	551.861	1047.0	1750.0	1201.4975	684.5635500000001	1398.5	623.9365	0.5697586137299496	0.44614694315337866
CG15760	7.000001	2.0	4.164	5.40711	3.03119	1.02782	0.0	0.0	131.83600884	64.592866966	68.00002521	91.981732719	4.5000005000000005	4.7855550000000004	79.9908789645	98.214437903	1.063456548504828	1.2278204612126795
AgmNAT	100.0	43.0	8.0	10.0	0.0	0.0	0.0	0.0	77.0	45.0	147.0	248.0	71.5	9.0	197.5	61.0	0.1258741258741259	0.30886075949367087
mRpL52	813.999	462.0	279.0	280.0	2.0	1.0	1.00119	0.0	279.0	260.0	328.0	601.0	637.9995	279.5	464.5	269.5	0.43808811762391664	0.5801937567276642
CG15771	4518.9491	3285.1462	2136.9974	2370.32	3.538329454	2.704403	3.08808	0.0	2427.06	2323.81	2718.43	4847.59	3902.04765	2253.6587	3783.01	2375.435	0.5775579649828213	0.627921945752192
CG1578	4720.155	3885.4208	2468.119	2737.356	370.349	620.9474	118.84383	91.58187	2359.881	2129.6443964076	2900.6511	5261.05	4302.787899999999	2602.7375	4080.85055	2244.7626982038	0.6048956073340265	0.5500722632941801
CG15784	244.9857	228.9831	169.5175	121.507	10.0	12.0198	4.01479	4.01636	180.483	129.493	183.0	458.98	236.9844	145.51225	320.99	154.988	0.6140161546498419	0.4828437022960217
zip	7380.8327858	5590.33641953465	3798.70395411103	4530.52732535865	22.4055003	21.4427145	135.175	141.665	4440.4760441282	5008.6010252956	5725.4729769409	9966.0677817	6485.584602667325	4164.61563973484	7845.770379320449	4724.5385347119	0.6421341937351429	0.6021764984563708
Dsor1	2178.997	1574.9974	988.993	901.1109	0.0	1.0672	0.0	0.0	1018.0065	957.8888	1214.0012	2189.9341	1876.9971999999998	945.05195	1701.96765	987.94765	0.5034914010527027	0.5804738121785099
ric8a	805.994	1077.996	717.8337	680.8382	1.01267	2.03079	1.00609	0.0	672.167	560.162	896.987	1232.97	941.9950000000001	699.33595	1064.9785	616.1645000000001	0.7423987919256471	0.5785698960119854
Dhc62B	18.0	18.0	10.0	6.0	2.0	2.0	2.0	0.0	6.0	5.0	12.0	20.0	18.0	8.0	16.0	5.5	0.4444444444444444	0.34375
Rop	1374.058	1171.2773	698.3807	765.8964	2.36998	0.0	13.9406	19.7273	851.619	781.103	1069.63	1723.0	1272.6676499999999	732.13855	1396.315	816.361	0.5752786676081537	0.5846538925672216
CG15812	956.815	894.659	697.332	807.614	0.0	3.05388	66.1854	59.341	773.669	726.386	641.0	1125.95	925.7370000000001	752.473	883.475	750.0274999999999	0.812836691198472	0.8489515832366507
CG15814	1433.6630000878	1037.4969	556.9513	723.5791	2.15912	7.50652	1.0906	2.17434	540.048	493.377	732.841	1464.49	1235.5799500439	640.2652	1098.6655	516.7125	0.5181900207892266	0.4703092069424224
Usp1	2568.8115969	3037.913251666	2408.118	2578.7980365	3.26202	8.62459	2.1866	1.08383	2934.882	2806.205	2901.734	4340.38	2803.362424283	2493.45801825	3621.057	2870.5434999999998	0.889452607572757	0.7927363474256274
CG1582	2052.9108	1754.9505	1160.99	1277.6591	0.0	6.27677	3.08983	2.04912	1231.01	1144.34	1549.0	2465.72	1903.93065	1219.32455	2007.36	1187.675	0.6404248757695035	0.5916601904989638
CG15820	476.973	254.951	186.508	161.249	0.0	0.0	19.0	8.04895	689.492	612.751	665.0	1001.0	365.962	173.8785	833.0	651.1215	0.4751271989988032	0.781658463385354
CG15822	355.771498796	175.1795	11.41873213907	5.00000467565	3.25315	2.08089	43.2283055833074	13.8202022127291	14.581307799639	10.0000007025	208.7467	398.919	265.475499398	8.20936840736	303.83285	12.2906542510695	0.03092326194310135	0.04045202568145446
Apoltp	29.0	15.0	3.0	4.0	0.0	0.0	0.0	3.0	5.0	11.0	11.0	27.0	22.0	3.5	19.0	8.0	0.1590909090909091	0.42105263157894735
GIIIspla2	687.9804	563.9995	428.4273	418.0142	1.01732	4.06437	1.01997	0.0	508.573	475.986	475.983	867.936	625.98995	423.22075	671.9595	492.2795	0.6760823396605649	0.7326029321707632
Kdm4A	1197.6700007932	1172.742062	1155.676213	1271.2400039696	122.86156327	200.66095442	15.3314	14.2602	962.32	921.759	883.138	1201.34	1185.2060313965999	1213.4581084848	1042.239	942.0395000000001	1.0238372707696306	0.9038613024459842
Orc6	540.0	438.0	351.0	336.0	0.0	0.0	0.0	0.0	314.0	277.0	310.0	457.0	489.0	343.5	383.5	295.5	0.7024539877300614	0.7705345501955672
Adf1	1323.916	1043.0	943.926	882.9094	49.3162	90.439	3.08538	0.0	980.073	981.09	1113.684	1847.56	1183.458	913.4177	1480.6219999999998	980.5815	0.7718209687204783	0.6622767323462707
Eip63F-1	79.72182	39.00002	47.2036	26.8181	2.54039	0.0	1.27825	0.0	37.79634	26.18188	27.45959	73.9999600801335	59.36091999999999	37.010850000000005	50.729775040066755	31.98911	0.6234884836690539	0.630578589688891
pain	605.2842	368.5173	152.634	139.96	2.02773	2.04829	0.0	0.0	134.809	108.573	373.546	812.379	486.90075	146.297	592.9625	121.691	0.3004657520038735	0.2052254569218121
Pka-R2	1913.40900107972	1393.3925	937.8689	966.6383	79.92546	144.34534	117.59147	82.60733	1010.1309	1057.3612	1522.075	2702.657	1653.40075053986	952.2536	2112.366	1033.74605	0.5759363540200856	0.4893782848237474
Pdrg1	171.931	120.0	84.4607	71.0	0.0	0.0	14.0688	9.0	109.539	91.0	70.0	159.0	145.96550000000002	77.73035	114.5	100.2695	0.5325254940379747	0.8757161572052401
Crk	2397.7818	1339.26235	968.76112	761.9328	1.21557	3.60436	15.2219	5.73767	1099.0474	963.04183	1581.14220001167	2801.4201	1868.522075	865.3469600000001	2191.281150005835	1031.044615	0.46311840335094784	0.4705213728495107
mRpL38	1387.0	900.0	525.953	665.119	2.00451	0.0	1.27091	0.0	603.047	640.653	925.995	1664.0	1143.5	595.5360000000001	1294.9975	621.85	0.5208010494097071	0.48019397720845025
CG15877	762.0	436.998	298.774	284.435	0.0	0.0	0.0	1.00219	495.226	386.565	456.0	907.0	599.499	291.60450000000003	681.5	440.89549999999997	0.4864136554022609	0.6469486426999266
CG15879	16.0275	20.0	14.8706	15.0	1.0	0.0	3.0	7.0	74.1294	57.99995	88.0	146.0	18.01375	14.9353	117.0	66.064675	0.829105544375824	0.5646553418803418
Ravus	332.997	316.0	205.429	262.663	1.00361	1.00459	1.00284	0.0	289.571	223.337	292.996	461.995	324.49850000000004	234.046	377.4955	256.454	0.7212544896201368	0.6793564426595814
CG15890	73.0	48.0	18.00003	5.67072	0.0	0.0	0.0	0.0	8.0	11.3293	4.0	26.0	60.5	11.835374999999999	15.0	9.66465	0.19562603305785123	0.64431
CG15891	353.0	236.0	137.46591	162.48391	1.0	1.0	0.0	0.0	170.535	187.516	214.0	457.0	294.5	149.97491000000002	335.5	179.0255	0.5092526655348049	0.5336080476900149
CG15894	3.0000022025	1.9999950495	1.9999995306	6.33276	0.0	0.0	2.000000757849	0.0	12.0	12.6672	41.0000000222392	66.9999862986142	2.499998626	4.1663797653	53.9999931604267	12.3336	1.666552822057431	0.22840002892886557
mldr	580.2727	425.9331	188.1052	176.7126	0.0	0.0	15.08	9.06647	110.376	112.583	262.0	471.0	503.1029	182.40890000000002	366.5	111.4795	0.362567776890175	0.3041732605729877
wuho	1082.87	647.184	357.027	375.23	1.00144	1.00725	18.3382	5.00877	353.044	311.228	723.846	1190.01	865.0269999999999	366.12850000000003	956.928	332.13599999999997	0.4232567307147639	0.34708567415730335
Ca-alpha1T	110.87162	32.955368	61.091700749061	75.01744	0.0	0.0	6.12842	1.04462	90.9082179935205	94.982500447776	61.00000373	139.999933606649	71.913494	68.0545703745305	100.4999686683245	92.94535922064824	0.946339366774899	0.9248297333046104
CG15908	340.0	205.0	70.5936	54.0	0.0	0.0	0.0	0.0	52.4064	35.0	111.0	170.0003	272.5	62.2968	140.50015000000002	43.703199999999995	0.22861211009174312	0.31105447218383747
REG	7508.9897	4725.9955	2008.579	1962.8884	1.00399	4.01468	3.00575	3.00488	2046.42000133597	1815.1132	3159.9922	5722.9907	6117.4926	1985.7337	4441.49145	1930.7666006679851	0.3245992810845411	0.4347113176741531
CG15912	32.0	35.0	16.0	20.0	0.0	0.0	0.0	0.0	43.0	27.0	69.0	104.0	33.5	18.0	86.5	35.0	0.5373134328358209	0.4046242774566474
CG15914	240.836	175.534	117.289	104.145	0.0	1.03145	0.0	0.0	145.258	110.829	209.0	345.969	208.185	110.717	277.4845	128.0435	0.5318202560222879	0.4614437923559694
CG15916	730.0	465.0	327.604	334.588	1.02136	1.00385	0.0	0.0	221.396	231.412	244.979	534.996	597.5	331.096	389.9875	226.404	0.5541355648535565	0.5805416840283342
CG15922	106.0	90.00001	30.0	33.0	0.0	0.0	0.0	0.0	32.0	39.0	95.0	139.0	98.000005	31.5	117.0	35.5	0.32142855502915535	0.3034188034188034
hop	1878.92	2281.73	1744.83	1944.68	1.07163	3.21422	13.0762	3.27393	2018.17	1914.32	2260.93	3513.79	2080.325	1844.755	2887.3599999999997	1966.245	0.8867628856068164	0.680983666740552
[truncated: 5,537 more rows]
