# Supplementary material for: Molecular Insights into Female Hybrid Sterility in Interspecific Crosses between <em>Drosophila melanogaster</em> and <em>Drosophila simulans</em>
Source: Preprints.org preprint supplement (doi:10.20944/preprints202404.1438.v1), 2024-04-23
Supplement: Supplementary file 1 [file supplementary › Table S1.xlsx]

## Sheet: Лист1
		Table S1. DEseq analysis hybrid versus D. melanogasterovaries
	baseMean	log2FoldChange	lfcSE	stat	pvalue	padj
Dmel_CG44884	40.2162	-8.34903	2.49617	-3.34473	0.000823619	0.00621254
Dmel_CG14630	36.4199	-8.2083	1.55859	-5.26649	1.39058e-07	3.5588e-06
Dmel_CG16840	28.9661	-7.87685	1.57625	-4.99721	5.81648e-07	1.26303e-05
Dmel_CG34031	60.7299	-7.49522	1.50482	-4.98081	6.33178e-07	1.36801e-05
Dmel_CG43090	17.9366	-7.18633	1.64931	-4.35716	1.31758e-05	0.000195857
Dmel_CG43074	48.2811	-7.16058	1.52244	-4.70335	2.55926e-06	4.66252e-05
Dmel_CG45782	15.0055	-6.92579	1.67758	-4.12844	3.65231e-05	0.000462536
Dmel_CG15848	12.0813	-6.61175	1.73257	-3.81616	0.000135547	0.0014249
Dmel_CG32834	12.023	-6.60191	1.74649	-3.78009	0.000156771	0.00160411
Dmel_CG42704	11.0648	-6.48345	1.75896	-3.68595	0.000227851	0.00218145
Dmel_CG11263	115.32	-6.40232	0.802097	-7.98198	1.44003e-15	1.43986e-13
Dmel_CG17012	10.3446	-6.39291	1.77947	-3.5926	0.000327391	0.00295992
Dmel_CG11760	9.80599	-6.31581	1.7956	-3.51739	0.000435817	0.00373266
Dmel_CG2187	218.415	-6.2338	0.593904	-10.4963	8.98285e-26	2.66357e-23
Dmel_CG33350	8.98596	-6.18705	1.81441	-3.40994	0.000649762	0.00516386
Dmel_CG12408	24.4965	-6.17469	1.58444	-3.89708	9.73579e-05	0.00108212
Dmel_CG33062	7.32131	-5.88897	1.88943	-3.11679	0.00182833	0.0115772
Dmel_CG31681	7.27531	-5.88565	1.90158	-3.09513	0.00196725	0.0123297
Dmel_CG15546	7.20773	-5.86814	1.89368	-3.0988	0.00194304	0.0121958
Dmel_CG45987	7.05341	-5.83909	1.90525	-3.06473	0.00217865	0.0133529
Dmel_CG12028	6.67719	-5.76023	1.92837	-2.9871	0.0028164	0.016374
Dmel_CG9897	6.36048	-5.6922	1.95961	-2.90477	0.00367529	0.0201555
Dmel_CG14509	6.40366	-5.69187	1.94737	-2.92285	0.00346839	0.0193416
Dmel_CG43689	36.3584	-5.61958	1.16222	-4.83522	1.33002e-06	2.58167e-05
Dmel_CG18186	79.7595	-5.54492	0.76972	-7.20381	5.85511e-13	4.12689e-11
Dmel_CG13636	207.026	-5.50643	0.512479	-10.7447	6.27727e-27	2.34688e-24
Dmel_CG9505	75.1961	-5.45179	0.832312	-6.55018	5.74694e-11	2.90694e-09
Dmel_CG17239	5.38613	-5.45076	2.0282	-2.68748	0.00719932	NA
Dmel_CG32243	288.11	-5.32346	0.416206	-12.7905	1.85385e-37	1.77125e-34
Dmel_CG2054	158.259	-5.30393	0.542176	-9.78267	1.33634e-22	3.02399e-20
Dmel_CG17684	13.6377	-5.27535	1.68223	-3.13592	0.00171316	0.0110206
Dmel_CG32088	4.6932	-5.25521	2.121	-2.4777	0.0132233	NA
Dmel_CG32277	4.63369	-5.23441	2.11013	-2.48061	0.0131157	NA
Dmel_CG34377	4.52749	-5.20636	2.16623	-2.40342	0.0162424	NA
Dmel_CG10390	60.7851	-5.17253	0.803871	-6.43453	1.23859e-10	5.60561e-09
Dmel_CG8505	4.35227	-5.13802	2.14081	-2.40004	0.0163933	NA
Dmel_CG30440	60.368	-5.12349	0.789881	-6.4864	8.79096e-11	4.19964e-09
Dmel_CG42345	37.6162	-5.09642	1.03325	-4.93242	8.12156e-07	1.69098e-05
Dmel_CG4778	34.8472	-5.06519	1.02113	-4.96037	7.03573e-07	1.49383e-05
Dmel_CG11956	579.747	-4.98043	0.321212	-15.5051	3.20391e-54	6.8876e-51
Dmel_CG4437	3.8651	-4.96476	2.22123	-2.23514	0.0254079	NA
Dmel_CG14351	3.75918	-4.93203	2.23116	-2.21052	0.0270689	NA
Dmel_CG6781	3.75415	-4.92079	2.25566	-2.18154	0.0291438	NA
Dmel_CG13375	62.7988	-4.83778	0.739487	-6.54207	6.06714e-11	3.05095e-09
Dmel_CG45986	3.50502	-4.83334	2.29108	-2.10964	0.0348893	NA
Dmel_CG12708	69.5131	-4.82623	0.704724	-6.8484	7.46805e-12	4.14308e-10
Dmel_CG13809	3.44551	-4.80523	2.28652	-2.10155	0.035593	NA
Dmel_CG8361	3.39407	-4.78505	2.30164	-2.07897	0.0376201	NA
Dmel_CG3827	3.29119	-4.74365	2.34437	-2.02342	0.0430297	NA
Dmel_CG16987	45.9987	-4.72377	0.900451	-5.24601	1.55432e-07	3.86289e-06
Dmel_CG4688	17.6253	-4.66125	1.27964	-3.64263	0.000269867	0.00252787
Dmel_CG33336	213.645	-4.64911	0.409189	-11.3618	6.48209e-30	3.27879e-27
Dmel_CG31280	3.02592	-4.62505	2.44917	-1.88841	0.0589704	NA
Dmel_CG40452	51.7056	-4.62364	0.760488	-6.07983	1.20307e-09	4.57752e-08
Dmel_CG33492	42.4872	-4.60687	0.827747	-5.56555	2.61326e-08	7.88472e-07
Dmel_CG6414	2.99363	-4.59105	2.72169	-1.68684	0.0916346	NA
Dmel_CG13998	8.02143	-4.52485	1.82785	-2.4755	0.0133049	0.0536534
Dmel_CG3239	2.79268	-4.50043	2.43846	-1.84561	0.0649492	NA
Dmel_CG7607	2.78787	-4.49074	2.4733	-1.81569	0.0694182	NA
Dmel_CG4471	6.50575	-4.48384	1.88724	-2.37587	0.0175078	0.0661175
Dmel_CG45075	2.74451	-4.47615	2.45273	-1.82497	0.0680058	NA
Dmel_CG44402	1247.09	-4.47513	0.243814	-18.3547	3.02527e-75	2.60143e-71
Dmel_CG12947	22.8929	-4.44309	1.09298	-4.06511	4.80102e-05	0.000587255
Dmel_CG42705	2.67171	-4.44059	2.50969	-1.76937	0.0768314	NA
Dmel_CG32320	2.67692	-4.42966	2.55338	-1.73482	0.0827725	NA
Dmel_CG9681	7.46551	-4.40904	1.8786	-2.34698	0.0189263	0.0700894
Dmel_CG32656	50.5863	-4.39565	2.05227	-2.14185	0.0322055	0.103465
Dmel_CG14141	2.58211	-4.38735	2.50161	-1.75381	0.0794631	NA
Dmel_CG40472	66.1906	-4.38472	0.648019	-6.76635	1.3207e-11	7.18333e-10
Dmel_CG43156	29.4777	-4.38088	1.00755	-4.34807	1.37339e-05	0.000202917
Dmel_CG11043	2.53875	-4.37134	2.57289	-1.699	0.0893188	NA
Dmel_CG32259	7.34841	-4.37021	1.86741	-2.34025	0.0192709	0.0709376
Dmel_CG3540	2.53068	-4.36036	2.52099	-1.72962	0.0836979	NA
Dmel_CG13563	21.6019	-4.35543	1.1064	-3.93657	8.2653e-05	0.000938882
Dmel_CG9252	1226.98	-4.35023	0.258874	-16.8044	2.26587e-63	9.74209e-60
Dmel_CG8346	42.8467	-4.34083	0.791658	-5.48321	4.17667e-08	1.20521e-06
Dmel_CG31893	2.47924	-4.33282	2.54614	-1.70172	0.0888077	NA
Dmel_CG14451	2.47116	-4.32098	2.54266	-1.69939	0.0892454	NA
Dmel_CG44876	2.43587	-4.31305	2.87193	-1.50179	0.13315	NA
Dmel_CG3258	2.41972	-4.29271	2.55663	-1.67905	0.0931421	NA
Dmel_CG43255	2.36828	-4.26389	2.57605	-1.65521	0.0978829	NA
Dmel_CG6713	6.85382	-4.2602	1.88056	-2.26539	0.023489	0.0820733
Dmel_CG14271	2.36021	-4.25151	2.59948	-1.63552	0.101939	NA
Dmel_CG10951	2.32492	-4.24591	2.69491	-1.57553	0.115135	NA
Dmel_CG32483	2.2654	-4.20431	2.63518	-1.59545	0.110611	NA
Dmel_CG43968	2.25733	-4.19143	2.61909	-1.60034	0.109523	NA
Dmel_CG15822	101	-4.17113	0.536572	-7.77368	7.62392e-15	6.90085e-13
Dmel_CG3871	216.492	-4.16303	0.436769	-9.53142	1.55143e-21	3.17637e-19
Dmel_CG11209	2.15445	-4.12886	2.66449	-1.54959	0.121241	NA
Dmel_CG31815	2.14638	-4.1152	2.67917	-1.536	0.124539	NA
Dmel_CG44251	6.10687	-4.09933	1.93187	-2.12195	0.0338422	NA
Dmel_CG14021	2.0956	-4.08363	2.69693	-1.51418	0.129981	NA
Dmel_CG46521	2.09494	-4.0825	2.69073	-1.51725	0.129204	NA
Dmel_CG10657	2.08687	-4.06945	2.80338	-1.45162	0.146607	NA
Dmel_CG13679	2.05157	-4.06314	2.74659	-1.47934	0.13905	NA
Dmel_CG11843	2.0435	-4.0491	2.70976	-1.49426	0.135106	NA
Dmel_CG12014	2.0435	-4.0491	2.70976	-1.49426	0.135106	NA
Dmel_CG17970	2.0435	-4.0491	2.70976	-1.49426	0.135106	NA
Dmel_CG15529	65.7974	-4.04022	0.651795	-6.1986	5.69673e-10	2.26788e-08
Dmel_CG6706	46.1475	-4.02055	0.742027	-5.41834	6.0154e-08	1.66579e-06
Dmel_CG13658	1.99206	-4.01492	2.73633	-1.46726	0.142304	NA
Dmel_CG13982	1.97721	-4.00543	2.75675	-1.45295	0.146237	NA
Dmel_CG3796	1.94062	-3.97985	2.77187	-1.4358	0.15106	NA
Dmel_CG42255	11.2214	-3.97715	1.3939	-2.85326	0.00432735	0.0227589
Dmel_CG18788	5.6197	-3.97037	1.96447	-2.02109	0.0432704	NA
Dmel_CG14904	1.92448	-3.95284	3.11992	-1.26697	0.205166	NA
Dmel_CG10186	1.92485	-3.94624	2.80441	-1.40715	0.159382	NA
Dmel_CG46435	1.88918	-3.94376	2.82115	-1.39792	0.162136	NA
Dmel_CG3546	1.88111	-3.92839	2.79225	-1.40689	0.159459	NA
Dmel_CG8704	1.88111	-3.92839	2.79225	-1.40689	0.159459	NA
Dmel_CG5338	10.9052	-3.92564	1.4014	-2.80123	0.00509088	0.0257509
Dmel_CG18188	1.92284	-3.92514	2.82362	-1.39011	0.164495	NA
Dmel_CG10047	665.184	-3.92103	0.25706	-15.2534	1.56385e-52	2.68951e-49
Dmel_CG2056	1.83774	-3.90641	2.8978	-1.34806	0.177638	NA
Dmel_CG4135	1.83774	-3.90641	2.8978	-1.34806	0.177638	NA
Dmel_CG44476	37.2448	-3.90463	0.802803	-4.86375	1.1518e-06	2.28738e-05
Dmel_CG13480	1.82967	-3.89119	2.81926	-1.38021	0.167521	NA
Dmel_CG44152	1.82967	-3.89119	2.81926	-1.38021	0.167521	NA
Dmel_CG17167	26.4926	-3.88863	0.916471	-4.24305	2.20502e-05	0.000300968
Dmel_CG16710	15.78	-3.87514	1.17601	-3.29517	0.000983619	0.00710172
Dmel_CG9220	99.3707	-3.87322	0.530628	-7.29932	2.89235e-13	2.14408e-11
Dmel_CG33955	1.81098	-3.8664	2.85364	-1.3549	0.175449	NA
Dmel_CG12520	1.78204	-3.85594	2.85425	-1.35094	0.176713	NA
Dmel_CG33307	1.79709	-3.85367	2.85112	-1.35163	0.176493	NA
Dmel_CG16844	5.32086	-3.8377	1.98398	-1.93435	0.0530707	NA
Dmel_CG18106	1.77016	-3.83641	2.87293	-1.33536	0.181758	NA
Dmel_CG43999	1.77016	-3.83641	2.87293	-1.33536	0.181758	NA
Dmel_CG42565	245.253	-3.83322	0.358517	-10.6919	1.11086e-26	3.98012e-24
Dmel_CG13360	1.72679	-3.81359	2.90692	-1.3119	0.189554	NA
Dmel_CG13167	1.71872	-3.79664	2.889	-1.31417	0.188788	NA
Dmel_CG15005	1.71872	-3.79664	2.889	-1.31417	0.188788	NA
Dmel_CG7352	35.0696	-3.79587	0.790143	-4.80402	1.55508e-06	2.94541e-05
Dmel_CG42573	1.70951	-3.79399	2.89264	-1.3116	0.189654	NA
Dmel_CG8316	84.352	-3.78879	0.526849	-7.19141	6.41233e-13	4.39461e-11
Dmel_CG10911	1.71065	-3.78273	3.24707	-1.16497	0.244032	NA
Dmel_CG13694	4.51243	-3.76676	2.06438	-1.82465	0.068054	NA
Dmel_CG9095	63.7748	-3.76162	0.590072	-6.37486	1.83134e-10	7.99373e-09
Dmel_CG4306	4.84926	-3.76103	2.03477	-1.84838	0.0645473	NA
Dmel_CG10146	14.6011	-3.76032	1.18394	-3.1761	0.0014927	0.00988124
Dmel_CG15189	1.65907	-3.75954	2.99528	-1.25515	0.209423	NA
Dmel_CG42759	1.66728	-3.75584	2.91622	-1.28791	0.197777	NA
Dmel_CG11382	285.673	-3.74721	0.324124	-11.5611	6.491e-31	3.72107e-28
Dmel_CG13905	1.65921	-3.73875	3.01452	-1.24025	0.214884	NA
Dmel_CG5125	1.63622	-3.73122	2.94289	-1.26787	0.204843	NA
Dmel_CG10801	1.62611	-3.72268	2.94868	-1.26249	0.206772	NA
Dmel_CG34411	1.62231	-3.71942	2.95088	-1.26045	0.207509	NA
Dmel_CG14916	1.61584	-3.71383	2.95466	-1.25694	0.208774	NA
Dmel_CG18348	1.61584	-3.71383	2.95466	-1.25694	0.208774	NA
Dmel_CG4467	1.61357	-3.71185	2.95599	-1.25571	0.209223	NA
Dmel_CG14913	1.60777	-3.69567	2.99505	-1.23392	0.217231	NA
Dmel_CG3257	1.60777	-3.69567	2.99505	-1.23392	0.217231	NA
Dmel_CG9792	1.60777	-3.69567	2.99505	-1.23392	0.217231	NA
Dmel_CG31262	601.728	-3.69158	0.27813	-13.2729	3.32629e-40	3.57535e-37
Dmel_CG30383	9.21203	-3.65938	1.51507	-2.41531	0.0157218	0.060815
Dmel_CG5326	454.386	-3.65439	0.385323	-9.48396	2.44823e-21	4.78462e-19
Dmel_CG13046	1.51296	-3.62545	3.09144	-1.17274	0.240901	NA
Dmel_CG33477	1.51296	-3.62545	3.09144	-1.17274	0.240901	NA
Dmel_CG9286	240.21	-3.61504	0.386827	-9.34539	9.15555e-21	1.64018e-18
Dmel_CG30371	4.41353	-3.61205	2.07962	-1.73688	0.0824084	NA
Dmel_CG7754	1.50489	-3.60645	3.03138	-1.18971	0.234162	NA
Dmel_CG8337	1.50489	-3.60645	3.03138	-1.18971	0.234162	NA
Dmel_CG15564	1.49682	-3.5899	3.40308	-1.0549	0.291472	NA
Dmel_CG44437	4.38815	-3.5892	2.09698	-1.7116	0.0869703	NA
Dmel_CG9737	1.45345	-3.55981	3.07159	-1.15895	0.246478	NA
Dmel_CG14340	1.44538	-3.53988	3.15695	-1.1213	0.262161	NA
Dmel_CG8196	1.44538	-3.53988	3.15695	-1.1213	0.262161	NA
Dmel_CG12068	63.1657	-3.53296	0.620738	-5.69156	1.25887e-08	4.10039e-07
Dmel_CG9889	33.4979	-3.51908	0.77317	-4.55149	5.32672e-06	8.92874e-05
Dmel_CG17594	4.8547	-3.51773	2.00955	-1.75051	0.0800311	NA
Dmel_CG7152	13.5825	-3.51607	1.2028	-2.92323	0.00346418	0.0193306
Dmel_CG1342	1.40201	-3.51155	3.12815	-1.12256	0.261623	NA
Dmel_CG10683	267.581	-3.50262	1.22562	-2.85785	0.00426523	0.0224873
Dmel_CG9460	16.5984	-3.4923	1.12003	-3.11804	0.00182058	0.0115451
Dmel_CG14302	1.39394	-3.49051	3.14809	-1.10877	0.267529	NA
Dmel_CG30044	1.39394	-3.49051	3.14809	-1.10877	0.267529	NA
Dmel_CG33236	1.39394	-3.49051	3.14809	-1.10877	0.267529	NA
Dmel_CG10936	109.698	-3.48258	0.48276	-7.2139	5.4372e-13	3.86401e-11
Dmel_CG14548	49.2649	-3.47438	0.716005	-4.85245	1.21943e-06	2.40371e-05
Dmel_CG1113	1.35057	-3.46131	3.21637	-1.07615	0.281858	NA
Dmel_CG4209	8.12656	-3.45295	1.50111	-2.30026	0.0214334	0.0767301
Dmel_CG1864	4.04722	-3.44981	2.14142	-1.61099	0.107182	NA
Dmel_CG8192	4.00386	-3.44012	2.13119	-1.61418	0.106488	NA
Dmel_CG13076	1.3425	-3.43979	3.1711	-1.08473	0.278041	NA
Dmel_CG14728	43.4392	-3.43157	0.668674	-5.1319	2.86827e-07	6.66602e-06
Dmel_CG3477	1.31963	-3.41744	3.18911	-1.0716	0.283902	NA
Dmel_CG14935	123.816	-3.41581	0.420992	-8.11371	4.90964e-16	5.34405e-14
Dmel_CG14791	140.416	-3.41215	0.411762	-8.28669	1.16439e-16	1.47244e-14
Dmel_CG30502	3.87492	-3.40792	2.15074	-1.58454	0.113071	NA
Dmel_CG11453	3.93627	-3.40314	2.176	-1.56394	0.117831	NA
Dmel_CG34192	1.29715	-3.39458	3.27013	-1.03806	0.299243	NA
Dmel_CG4325	15.0137	-3.39251	1.10019	-3.08358	0.00204527	0.012731
Dmel_CG15825	7.73826	-3.38996	1.55526	-2.17967	0.0292818	0.0965839
Dmel_CG17461	30.5018	-3.38744	0.812691	-4.16818	3.07043e-05	0.00039763
Dmel_CG13297	1.29106	-3.38734	3.21298	-1.05427	0.291761	NA
Dmel_CG16704	1.29106	-3.38734	3.21298	-1.05427	0.291761	NA
Dmel_CG34136	1.29106	-3.38734	3.21298	-1.05427	0.291761	NA
Dmel_CG7271	1.29106	-3.38734	3.21298	-1.05427	0.291761	NA
Dmel_CG42361	11.5306	-3.38627	1.27908	-2.64742	0.00811087	0.0371381
Dmel_CG12716	116.751	-3.38131	1.23411	-2.73988	0.00614623	0.0299103
Dmel_CG16749	3.77204	-3.36907	2.16741	-1.55442	0.120084	NA
Dmel_CG17450	1.28299	-3.36731	3.59969	-0.935444	0.349559	NA
Dmel_CG42277	1.28299	-3.36731	3.59969	-0.935444	0.349559	NA
Dmel_CG5993	11.3393	-3.36001	1.27312	-2.6392	0.0083103	0.0378698
Dmel_CG45088	14.7957	-3.35356	1.19955	-2.79568	0.00517906	0.0261048
Dmel_CG12582	760.536	-3.3523	0.240444	-13.9421	3.51369e-44	5.0357e-41
Dmel_CG42521	11.3359	-3.35178	1.26042	-2.65925	0.00783142	0.0361085
Dmel_CG14570	7.45918	-3.34316	1.54006	-2.1708	0.0299463	0.0980612
Dmel_CG11029	1.23962	-3.33289	3.27383	-1.01804	0.308659	NA
Dmel_CG4318	1.23962	-3.33289	3.27383	-1.01804	0.308659	NA
Dmel_CG14223	155.664	-3.33071	0.403039	-8.26399	1.40884e-16	1.70628e-14
Dmel_CG3346	44.0502	-3.31545	0.660819	-5.01718	5.24365e-07	1.15616e-05
Dmel_CG14238	1.23155	-3.30924	3.34053	-0.990632	0.321865	NA
Dmel_CG17878	1.23155	-3.30924	3.34053	-0.990632	0.321865	NA
Dmel_CG13154	3.60965	-3.29886	2.19214	-1.50486	0.132361	NA
Dmel_CG13916	3.60965	-3.29886	2.19214	-1.50486	0.132361	NA
Dmel_CG41284	3.60158	-3.28894	2.20249	-1.49328	0.135363	NA
Dmel_CG42514	214.098	-3.28728	0.370968	-8.86135	7.90494e-19	1.15211e-16
Dmel_CG7676	10.7521	-3.28708	1.2913	-2.54556	0.0109103	0.0462382
Dmel_CG5387	1.20767	-3.28167	3.32023	-0.988384	0.322965	NA
Dmel_CG5731	1.18818	-3.27605	3.36736	-0.972882	0.330612	NA
Dmel_CG14572	1.18818	-3.27605	3.36736	-0.972882	0.330612	NA
Dmel_CG3666	1.18818	-3.27605	3.36736	-0.972882	0.330612	NA
Dmel_CG10594	38.2841	-3.27298	0.740774	-4.41832	9.94699e-06	0.000154673
Dmel_CG11335	7.02161	-3.27125	1.6433	-1.99066	0.0465181	0.135093
Dmel_CG5204	3.55014	-3.2679	2.20498	-1.48205	0.138327	NA
Dmel_CG2488	56.9661	-3.26465	0.587156	-5.56011	2.69606e-08	8.1061e-07
Dmel_CG44250	32.0293	-3.25891	0.921502	-3.53652	0.000405433	0.00352268
Dmel_CG15884	1.18011	-3.25135	3.34629	-0.971627	0.331236	NA
Dmel_CG5391	1.18011	-3.25135	3.34629	-0.971627	0.331236	NA
Dmel_CG6132	1.18011	-3.25135	3.34629	-0.971627	0.331236	NA
Dmel_CG8837	1.18011	-3.25134	3.34629	-0.971626	0.331237	NA
Dmel_CG11010	10.8597	-3.24823	1.29332	-2.51155	0.0120203	0.0497415
Dmel_CG33962	882.737	-3.24226	1.59385	-2.03424	0.0419274	0.124795
Dmel_CG8782	489.069	-3.23923	0.286091	-11.3224	1.01691e-29	4.85801e-27
Dmel_CG40050	34.8421	-3.23768	0.73328	-4.41535	1.00848e-05	0.000156251
Dmel_CG8515	3.51668	-3.23079	2.2065	-1.46421	0.143136	NA
Dmel_CG4547	3.44726	-3.22503	2.21925	-1.45321	0.146165	NA
Dmel_CG10814	1.13674	-3.21449	3.74928	-0.857364	0.391244	NA
Dmel_CG30082	1.13674	-3.21449	3.74928	-0.857364	0.391244	NA
Dmel_CG30274	1.13674	-3.21449	3.74928	-0.857364	0.391244	NA
Dmel_CG33282	1.13674	-3.21449	3.74928	-0.857364	0.391244	NA
Dmel_CG4472	17.1532	-3.2089	1.00875	-3.18106	0.00146738	0.00978058
Dmel_CG13361	1.12867	-3.19139	3.38821	-0.941911	0.346238	NA
Dmel_CG14528	1.12867	-3.19139	3.38821	-0.941911	0.346238	NA
Dmel_CG16898	1.12867	-3.19139	3.38821	-0.941911	0.346238	NA
Dmel_CG42293	1.12867	-3.19139	3.38821	-0.941911	0.346238	NA
Dmel_CG42780	1.12867	-3.19139	3.38821	-0.941911	0.346238	NA
Dmel_CG9092	1.12867	-3.19139	3.38821	-0.941911	0.346238	NA
Dmel_CG43772	6.6913	-3.18163	1.63427	-1.94681	0.051557	0.145071
Dmel_CG32702	185.186	-3.18064	0.393502	-8.08292	6.32348e-16	6.71304e-14
Dmel_CG6816	309.381	-3.17266	0.328901	-9.64625	5.09886e-22	1.09613e-19
Dmel_CG13318	6.77617	-3.16894	1.6194	-1.95686	0.0503638	0.142742
Dmel_CG43293	6.47705	-3.16661	1.64671	-1.92299	0.0544808	0.150976
Dmel_CG18085	189.958	-3.16349	0.367001	-8.61984	6.70481e-18	9.45159e-16
Dmel_CG8252	6.7328	-3.16168	1.65425	-1.91125	0.0559729	0.153626
Dmel_CG31517	157.398	-3.14814	0.395244	-7.96505	1.65162e-15	1.6139e-13
Dmel_CG11062	1.07723	-3.1289	3.45463	-0.905711	0.365089	NA
Dmel_CG14984	1.07723	-3.1289	3.45463	-0.905711	0.365089	NA
Dmel_CG3006	1.07723	-3.1289	3.45463	-0.905711	0.365089	NA
Dmel_CG32036	1.07723	-3.1289	3.45463	-0.905711	0.365089	NA
Dmel_CG9033	6.42348	-3.12794	1.66525	-1.87836	0.0603322	0.16182
Dmel_CG12003	3.25948	-3.11796	2.29014	-1.36147	0.173365	NA
Dmel_CG12345	1.06916	-3.10405	3.85646	-0.804897	0.420879	NA
Dmel_CG13618	1.06916	-3.10405	3.85646	-0.804897	0.420879	NA
Dmel_CG32823	1.06916	-3.10405	3.85646	-0.804897	0.420879	NA
Dmel_CG5927	1.06916	-3.10405	3.85646	-0.804897	0.420879	NA
Dmel_CG31559	3.18198	-3.10061	2.27633	-1.36211	0.173163	NA
Dmel_CG12923	1.05413	-3.09459	3.48354	-0.888348	0.374354	NA
Dmel_CG32037	6.3027	-3.0868	1.61079	-1.91633	0.0553232	0.152671
Dmel_CG34220	9.44492	-3.0757	1.32193	-2.32667	0.0199826	0.0728094
Dmel_CG3132	210.376	-3.07532	0.383206	-8.02524	1.01325e-15	1.03726e-13
Dmel_CG13970	1.02579	-3.06338	3.55676	-0.861283	0.389082	NA
Dmel_CG1895	1.02579	-3.06338	3.55676	-0.861283	0.389082	NA
Dmel_CG31509	1.02579	-3.06338	3.55676	-0.861283	0.389082	NA
Dmel_CG32055	1.02579	-3.06338	3.55676	-0.861283	0.389082	NA
Dmel_CG4316	1.02579	-3.06338	3.55676	-0.861283	0.389082	NA
Dmel_CG43218	1.02579	-3.06338	3.55676	-0.861283	0.389082	NA
Dmel_CG44142	1.02579	-3.06338	3.55676	-0.861283	0.389082	NA
Dmel_CG13737	27.9383	-3.06322	0.901534	-3.39779	0.000679325	0.00532985
Dmel_CG9362	124.836	-3.05954	0.420246	-7.28036	3.32939e-13	2.42622e-11
Dmel_CG40006	434.758	-3.04397	0.264831	-11.494	1.41412e-30	7.6e-28
Dmel_CG42640	28.1513	-3.03934	0.829741	-3.663	0.000249282	0.00235817
Dmel_CG6869	3.13239	-3.03591	2.31087	-1.31375	0.18893	NA
Dmel_CG30052	1.01772	-3.03466	3.58202	-0.847194	0.396887	NA
Dmel_CG31268	1.01772	-3.03466	3.58202	-0.847194	0.396887	NA
Dmel_CG4459	1.01772	-3.03466	3.58202	-0.847194	0.396887	NA
Dmel_CG12268	1.01772	-3.03466	3.58202	-0.847194	0.396887	NA
Dmel_CG34232	2.92013	-3.03087	2.38857	-1.2689	0.204475	NA
Dmel_CG13568	40.1014	-3.02736	0.687972	-4.40042	1.08043e-05	0.000165609
Dmel_CG13610	77.8246	-3.0273	0.52459	-5.77079	7.88997e-09	2.59946e-07
Dmel_CG17129	198.858	-3.02316	0.36903	-8.19217	2.56552e-16	2.94145e-14
Dmel_CG14218	6.22164	-3.02217	1.65286	-1.82845	0.0674821	0.175431
Dmel_CG18586	329.644	-3.0213	0.296757	-10.1811	2.40888e-24	6.27696e-22
Dmel_CG1501	40.3145	-3.01808	0.660831	-4.5671	4.94518e-06	8.37079e-05
Dmel_CG14715	39.8975	-3.01545	0.691717	-4.35937	1.30438e-05	0.000195067
Dmel_CG32845	6.06525	-3.01477	1.64614	-1.83142	0.0670374	NA
Dmel_CG8628	0.99548	-3.00522	3.6104	-0.83238	0.405195	NA
Dmel_CG17127	3.01152	-3.00322	2.31322	-1.29829	0.194189	NA
Dmel_CG2772	0.974347	-2.99225	3.98165	-0.751509	0.452346	NA
Dmel_CG33051	117.771	-2.99173	0.460685	-6.49408	8.35413e-11	4.0586e-09
Dmel_CG8908	98.7822	-2.98625	0.460555	-6.48402	8.93088e-11	4.24291e-09
Dmel_CG33207	9.01793	-2.97593	1.42621	-2.0866	0.0369242	0.1136
Dmel_CG6705	10.5559	-2.97528	1.21139	-2.45608	0.0140461	0.056025
Dmel_CG15571	130.507	-2.9694	1.41188	-2.10316	0.0354522	0.110374
Dmel_CG14902	0.966275	-2.96458	3.61329	-0.820465	0.411951	NA
Dmel_CG33532	0.966275	-2.96458	3.61329	-0.820465	0.411951	NA
Dmel_CG5882	0.966275	-2.96458	3.61329	-0.820465	0.411951	NA
Dmel_CG8358	0.966275	-2.96458	3.61329	-0.820465	0.411951	NA
Dmel_CG8822	0.966275	-2.96458	3.61329	-0.820465	0.411951	NA
Dmel_CG9649	0.966275	-2.96458	3.61329	-0.820465	0.411951	NA
Dmel_CG6185	0.966275	-2.96457	3.61329	-0.820464	0.411951	NA
Dmel_CG13434	58.3825	-2.95403	0.562423	-5.25233	1.50188e-07	3.76521e-06
Dmel_CG4036	117.84	-2.94586	0.45833	-6.42739	1.29817e-10	5.81406e-09
Dmel_CG11320	8.7619	-2.93912	1.34935	-2.17817	0.0293935	0.0967667
Dmel_CG13320	20.4167	-2.93756	0.95694	-3.06974	0.00214242	0.0131716
Dmel_CG11533	278.908	-2.93662	0.297497	-9.87109	5.5559e-23	1.32709e-20
Dmel_CG12645	2.8925	-2.93144	2.62874	-1.11515	0.264787	NA
Dmel_CG33995	5.60322	-2.92883	1.71891	-1.70388	0.088403	NA
Dmel_CG7214	2.8572	-2.92519	2.34413	-1.24788	0.212075	NA
Dmel_CG43479	2.30142	-2.92461	2.51689	-1.16199	0.245238	NA
Dmel_CG44883	19.7351	-2.91665	0.998008	-2.92247	0.00347266	0.0193528
Dmel_CG34323	5.6196	-2.91534	1.75732	-1.65896	0.0971232	NA
Dmel_CG5367	119.919	-2.90983	0.417733	-6.96576	3.26624e-12	1.93699e-10
Dmel_CG32214	0.921552	-2.90174	3.67603	-0.789368	0.429897	NA
Dmel_CG31373	108.2	-2.9011	0.446437	-6.49835	8.12046e-11	3.99016e-09
Dmel_CG10034	669.665	-2.89894	0.237182	-12.2224	2.36052e-34	2.02981e-31
Dmel_CG40733	2.80576	-2.89822	2.3641	-1.22593	0.220225	NA
Dmel_CG11131	3.41851	-2.89646	2.2398	-1.29318	0.195949	NA
Dmel_CG5568	582.182	-2.89348	0.267043	-10.8353	2.34237e-27	9.59145e-25
Dmel_CG33192	0.914835	-2.8912	3.68627	-0.784314	0.432856	NA
Dmel_CG14695	0.914835	-2.8912	3.68627	-0.784314	0.432856	NA
Dmel_CG2650	0.914835	-2.8912	3.68627	-0.784314	0.432856	NA
Dmel_CG30062	0.914835	-2.8912	3.68627	-0.784314	0.432856	NA
Dmel_CG32540	0.914835	-2.8912	3.68627	-0.784314	0.432856	NA
Dmel_CG33696	0.914835	-2.8912	3.68627	-0.784314	0.432856	NA
Dmel_CG3839	0.914835	-2.8912	3.68627	-0.784314	0.432856	NA
Dmel_CG42749	0.914835	-2.8912	3.68627	-0.784314	0.432856	NA
Dmel_CG4726	0.914835	-2.8912	3.68627	-0.784314	0.432856	NA
Dmel_CG9657	0.914835	-2.8912	3.68627	-0.784314	0.432856	NA
Dmel_CG1212	166.55	-2.89063	0.375236	-7.70351	1.32382e-14	1.14985e-12
Dmel_CG31525	8.57413	-2.8903	1.41818	-2.03804	0.0415463	0.124117
Dmel_CG13148	31.2615	-2.86974	0.7663	-3.74493	0.000180446	0.00178351
Dmel_CG12286	1140.31	-2.86765	0.268609	-10.6759	1.31954e-26	4.53868e-24
Dmel_CG12548	5.52663	-2.86355	1.69189	-1.69251	0.0905488	NA
Dmel_CG10654	439.308	-2.85644	0.308908	-9.24687	2.31173e-20	3.97571e-18
Dmel_CG14187	127.636	-2.84173	0.528853	-5.37339	7.72683e-08	2.0894e-06
Dmel_CG8965	84.4276	-2.83881	0.48913	-5.8038	6.48272e-09	2.18607e-07
Dmel_CG18233	10.7972	-2.83052	1.21298	-2.33352	0.0196209	0.0719487
Dmel_CG6405	2.69481	-2.82871	2.38389	-1.1866	0.235387	NA
Dmel_CG10702	492.169	-2.82479	0.275089	-10.2686	9.76047e-25	2.62282e-22
Dmel_CG12296	35.1073	-2.82195	0.691572	-4.08049	4.49413e-05	0.000556844
Dmel_CG31674	65.202	-2.81913	0.520319	-5.41807	6.02466e-08	1.66579e-06
Dmel_CG5921	46.1908	-2.81711	0.62305	-4.52148	6.14077e-06	9.98194e-05
Dmel_CG30048	0.863395	-2.81378	3.80171	-0.740134	0.459219	NA
Dmel_CG11348	0.863395	-2.81378	3.80171	-0.740134	0.459219	NA
Dmel_CG18744	0.863395	-2.81378	3.80171	-0.740134	0.459219	NA
Dmel_CG32727	0.863395	-2.81378	3.80171	-0.740134	0.459219	NA
Dmel_CG6367	0.863395	-2.81378	3.80171	-0.740134	0.459219	NA
Dmel_CG9631	0.863395	-2.81378	3.80171	-0.740134	0.459219	NA
Dmel_CG42771	17.7854	-2.80617	1.09546	-2.56164	0.010418	0.0447029
Dmel_CG14684	5.27867	-2.80386	1.74197	-1.60959	0.107488	NA
Dmel_CG6800	10.7384	-2.8011	1.23101	-2.27544	0.0228794	0.0804335
Dmel_CG46121	50.5753	-2.79808	0.59546	-4.69901	2.61421e-06	4.74253e-05
Dmel_CG30414	49.666	-2.79741	0.646845	-4.3247	1.5274e-05	0.000222235
Dmel_CG13992	285.952	-2.79637	0.341194	-8.19582	2.4889e-16	2.89217e-14
Dmel_CG1744	2.70475	-2.79581	2.4003	-1.16478	0.24411	NA
Dmel_CG10833	0.855324	-2.78189	4.21114	-0.660604	0.508867	NA
Dmel_CG18563	0.855324	-2.78189	4.21114	-0.660604	0.508867	NA
Dmel_CG32673	0.855324	-2.78189	4.21114	-0.660604	0.508867	NA
Dmel_CG8492	0.855324	-2.78189	4.21114	-0.660604	0.508867	NA
Dmel_CG5849	2.66136	-2.78115	2.398	-1.15978	0.246138	NA
Dmel_CG43673	2.66136	-2.78115	2.398	-1.15978	0.246138	NA
Dmel_CG4015	402.139	-2.77342	0.879177	-3.15457	0.00160735	0.0104551
Dmel_CG17914	5.33053	-2.77101	1.67857	-1.65081	0.0987765	NA
Dmel_CG7802	2.59411	-2.76819	2.43117	-1.13862	0.25486	NA
Dmel_CG2909	86.2301	-2.76396	0.466275	-5.92774	3.07128e-09	1.10041e-07
Dmel_CG11261	77.7614	-2.76018	0.499448	-5.52647	3.26745e-08	9.68856e-07
Dmel_CG13300	10.4651	-2.75743	1.23349	-2.23548	0.025386	0.0870391
Dmel_CG13374	5.26321	-2.75205	1.74114	-1.58061	0.113968	NA
Dmel_CG4666	77.1122	-2.74401	0.540459	-5.07718	3.83077e-07	8.57833e-06
Dmel_CG33971	17.9403	-2.74264	1.00433	-2.73081	0.00631794	0.0304529
Dmel_CG5992	257.85	-2.73963	0.307203	-8.91798	4.7488e-19	7.04051e-17
Dmel_CG7459	5.06484	-2.73673	1.76507	-1.55049	0.121024	NA
Dmel_CG14410	33.5514	-2.73623	0.725131	-3.77342	0.000161024	0.00163091
Dmel_CG11313	0.811956	-2.72937	4.28494	-0.636969	0.524145	NA
Dmel_CG14645	0.811956	-2.72937	4.28494	-0.636969	0.524145	NA
Dmel_CG33503	0.811956	-2.72937	4.28494	-0.636969	0.524145	NA
Dmel_CG5644	7.65862	-2.72914	1.41109	-1.93407	0.0531043	0.148213
Dmel_CG13516	18.1684	-2.72748	0.964947	-2.82656	0.00470508	0.02424
Dmel_CG40178	131.1	-2.72685	0.392003	-6.95619	3.49591e-12	2.05899e-10
Dmel_CG13888	2.53246	-2.72536	2.42854	-1.12222	0.26177	NA
Dmel_CG8102	2.58069	-2.71782	2.43073	-1.11811	0.263521	NA
Dmel_CG4381	155.099	-2.71642	0.379409	-7.15961	8.09044e-13	5.393e-11
Dmel_CG12398	243.297	-2.7111	0.317848	-8.52955	1.46924e-17	1.97406e-15
Dmel_CG32573	5.03946	-2.71028	1.72875	-1.56777	0.116934	NA
Dmel_CG42566	54.9573	-2.70905	0.608432	-4.45251	8.48725e-06	0.000133179
Dmel_CG11598	2.55041	-2.70616	2.42263	-1.11703	0.26398	NA
Dmel_CG33475	2.55041	-2.70616	2.42263	-1.11703	0.26398	NA
Dmel_CG2471	60.0162	-2.70248	0.559275	-4.83212	1.35089e-06	2.6104e-05
Dmel_CG7100	190.517	-2.70173	0.393173	-6.87161	6.34818e-12	3.59132e-10
Dmel_CG15095	89.8441	-2.69958	0.450292	-5.99518	2.03262e-09	7.50152e-08
Dmel_CG5952	2.54637	-2.69781	2.42324	-1.11331	0.265575	NA
Dmel_CG11459	0.803884	-2.69538	3.92322	-0.687034	0.492061	NA
Dmel_CG2045	0.803884	-2.69538	3.92322	-0.687034	0.492061	NA
Dmel_CG42608	0.803884	-2.69538	3.92322	-0.687034	0.492061	NA
Dmel_CG4891	0.803884	-2.69538	3.92322	-0.687034	0.492061	NA
Dmel_CG5697	0.803884	-2.69538	3.92322	-0.687034	0.492061	NA
Dmel_CG7560	0.803884	-2.69538	3.92322	-0.687034	0.492061	NA
Dmel_CG9447	0.803884	-2.69538	3.92322	-0.687034	0.492061	NA
Dmel_CG9568	0.803884	-2.69538	3.92322	-0.687034	0.492061	NA
Dmel_CG14723	0.803884	-2.69538	3.92322	-0.687034	0.492061	NA
Dmel_CG42584	0.803884	-2.69538	3.92322	-0.687034	0.492061	NA
Dmel_CG10045	5351.93	-2.69437	0.202086	-13.3328	1.49226e-40	1.83313e-37
Dmel_CG15818	2.48098	-2.69434	2.44792	-1.10067	0.271041	NA
Dmel_CG30287	2.48098	-2.69434	2.44792	-1.10067	0.271041	NA
Dmel_CG43860	19.7677	-2.6942	0.929485	-2.89859	0.00374841	0.0204781
Dmel_CG5853	290.992	-2.68946	0.357859	-7.51541	5.67318e-14	4.60223e-12
Dmel_CG2930	106.747	-2.6853	0.417304	-6.4349	1.23558e-10	5.60561e-09
Dmel_CG34135	12.1601	-2.68484	1.1324	-2.37093	0.0177432	0.0668439
Dmel_CG12581	300.559	-2.68297	0.298148	-8.99876	2.28278e-19	3.56902e-17
Dmel_CG40160	460.965	-2.68214	0.255472	-10.4988	8.75288e-26	2.66357e-23
Dmel_CG31901	2.49897	-2.67496	2.44184	-1.09547	0.27331	NA
Dmel_CG43355	2.49897	-2.67496	2.44184	-1.09547	0.27331	NA
Dmel_CG31810	2.42954	-2.66269	2.47556	-1.07559	0.282109	NA
Dmel_CG6739	14.7189	-2.66076	1.01704	-2.61617	0.00889223	0.0399291
Dmel_CG18140	4.87707	-2.65532	1.74264	-1.52373	0.127576	NA
Dmel_CG40439	200.289	-2.64686	0.347173	-7.62405	2.45835e-14	2.07249e-12
Dmel_CG33177	2.42147	-2.64648	2.46666	-1.0729	0.283317	NA
Dmel_CG9428	2.44753	-2.64293	2.46931	-1.07031	0.284479	NA
Dmel_CG8303	575.298	-2.64198	0.269476	-9.80411	1.08096e-22	2.51221e-20
Dmel_CG14314	153.026	-2.63537	0.424254	-6.21177	5.23911e-10	2.0954e-08
Dmel_CG5966	120.232	-2.63373	0.467237	-5.63682	1.73216e-08	5.41631e-07
Dmel_CG6361	5.39278	-2.63359	1.72505	-1.52668	0.126841	NA
Dmel_CG11380	4.74006	-2.62574	1.80323	-1.45613	0.145356	NA
Dmel_CG18754	6.1303	-2.62463	1.68925	-1.55373	0.12025	NA
Dmel_CG16705	7.14422	-2.62354	1.45526	-1.8028	0.0714193	0.182398
Dmel_CG16858	1432.15	-2.62027	0.284177	-9.22055	2.9559e-20	4.88803e-18
Dmel_CG31622	18.7736	-2.6148	0.985481	-2.65333	0.00797022	0.0366306
Dmel_CG16756	2.37003	-2.61378	2.47878	-1.05447	0.29167	NA
Dmel_CG33147	2.37003	-2.61378	2.47878	-1.05447	0.29167	NA
Dmel_CG6578	45.5601	-2.61072	0.687489	-3.79747	0.000146182	0.00151266
Dmel_CG4715	183.421	-2.6102	0.39407	-6.62371	3.50304e-11	1.83675e-09
Dmel_CG31955	4.8307	-2.60709	1.79298	-1.45405	0.145932	NA
Dmel_CG10296	0.752444	-2.6064	3.99729	-0.652042	0.514374	NA
Dmel_CG13198	0.752444	-2.6064	3.99729	-0.652042	0.514374	NA
Dmel_CG32219	0.752444	-2.6064	3.99729	-0.652042	0.514374	NA
Dmel_CG41242	0.752444	-2.6064	3.99729	-0.652042	0.514374	NA
Dmel_CG11910	0.752444	-2.6064	3.99729	-0.652042	0.514374	NA
Dmel_CG13108	0.752444	-2.6064	3.99729	-0.652042	0.514374	NA
Dmel_CG13227	0.752444	-2.6064	3.99729	-0.652042	0.514374	NA
Dmel_CG30141	0.752444	-2.6064	3.99729	-0.652042	0.514374	NA
Dmel_CG34127	0.752444	-2.6064	3.99729	-0.652042	0.514374	NA
Dmel_CG34245	0.752444	-2.6064	3.99729	-0.652042	0.514374	NA
Dmel_CG5737	0.752444	-2.6064	3.99729	-0.652042	0.514374	NA
Dmel_CG6520	0.752444	-2.6064	3.99729	-0.652042	0.514374	NA
Dmel_CG8141	0.752444	-2.6064	3.99729	-0.652042	0.514374	NA
Dmel_CG11370	0.752444	-2.6064	3.99729	-0.652042	0.514374	NA
Dmel_CG42315	9.48079	-2.60618	1.26189	-2.06529	0.0388951	0.117933
Dmel_CG12283	156.588	-2.59807	0.357772	-7.26183	3.81902e-13	2.75964e-11
Dmel_CG3440	2.38802	-2.59396	2.47233	-1.0492	0.294088	NA
Dmel_CG5232	2.38802	-2.59396	2.47233	-1.0492	0.294088	NA
Dmel_CG15422	4.63718	-2.59229	1.81862	-1.42541	0.154038	NA
Dmel_CG1471	7.32137	-2.59091	1.49334	-1.73497	0.0827462	0.20215
Dmel_CG15329	4.70661	-2.58967	1.74145	-1.48708	0.136994	NA
Dmel_CG42601	80.8174	-2.58869	0.491756	-5.26417	1.4082e-07	3.59322e-06
Dmel_CG2064	84.4847	-2.58501	0.471408	-5.48359	4.16784e-08	1.20521e-06
Dmel_CG31710	27.5083	-2.58452	0.783319	-3.29944	0.000968767	0.00702397
Dmel_CG3504	2.31778	-2.58045	2.52261	-1.02293	0.306341	NA
Dmel_CG3363	573.466	-2.57954	0.256455	-10.0585	8.43146e-24	2.13242e-21
Dmel_CG18572	1945.39	-2.57791	0.212023	-12.1586	5.16172e-34	3.6988e-31
Dmel_CG1089	176.424	-2.57637	0.343726	-7.49542	6.60855e-14	5.31092e-12
Dmel_CG44880	50.2563	-2.57335	2.42113	-1.06287	0.28784	0.469132
Dmel_CG8105	11.673	-2.56366	1.16272	-2.20489	0.0274621	0.0921221
Dmel_CG7194	55.691	-2.56137	0.581783	-4.40261	1.06955e-05	0.000164233
Dmel_CG31021	2.33658	-2.56031	2.49133	-1.02769	0.304096	NA
Dmel_CG6128	46.8849	-2.55669	0.588073	-4.34758	1.37648e-05	0.000203024
Dmel_CG13083	1713.26	-2.54882	0.996277	-2.55835	0.0105171	0.0450124
Dmel_CG31743	102.705	-2.54305	0.474639	-5.35785	8.42163e-08	2.256e-06
Dmel_CG15638	2.32851	-2.54277	2.51913	-1.00938	0.312791	NA
Dmel_CG8588	1189.16	-2.54246	0.21095	-12.0524	1.88314e-33	1.15665e-30
Dmel_CG15865	4.62171	-2.53557	1.82266	-1.39114	0.164184	NA
Dmel_CG12971	2.37142	-2.53454	2.47447	-1.02428	0.305704	NA
Dmel_CG9449	82.7572	-2.53262	0.493834	-5.12849	2.92072e-07	6.76962e-06
Dmel_CG10175	27.0591	-2.53207	0.759242	-3.335	0.000852988	0.00635602
Dmel_CG6845	101.257	-2.5262	0.474399	-5.32505	1.00924e-07	2.65396e-06
Dmel_CG10816	29.5015	-2.52574	0.7268	-3.47515	0.000510559	0.00426656
Dmel_CG5717	2442.12	-2.52422	0.767323	-3.28965	0.00100313	0.00718827
Dmel_CG4790	3151.55	-2.5215	0.208715	-12.0811	1.32989e-33	8.7967e-31
Dmel_CG3523	1639.7	-2.51847	0.206719	-12.1831	3.82624e-34	2.99108e-31
Dmel_CG8083	0.701005	-2.51168	4.13232	-0.607813	0.543311	NA
Dmel_CG11529	0.701004	-2.51168	4.13233	-0.607813	0.543312	NA
Dmel_CG12900	0.701004	-2.51168	4.13233	-0.607813	0.543312	NA
Dmel_CG15902	0.701004	-2.51168	4.13233	-0.607813	0.543312	NA
Dmel_CG3242	0.701004	-2.51168	4.13233	-0.607813	0.543312	NA
Dmel_CG32693	0.701004	-2.51168	4.13233	-0.607813	0.543312	NA
Dmel_CG34305	0.701004	-2.51168	4.13233	-0.607813	0.543312	NA
Dmel_CG42234	0.701004	-2.51168	4.13233	-0.607813	0.543312	NA
Dmel_CG42366	0.701004	-2.51168	4.13233	-0.607813	0.543312	NA
Dmel_CG43331	0.701004	-2.51168	4.13233	-0.607813	0.543312	NA
Dmel_CG44424	0.701004	-2.51168	4.13233	-0.607813	0.543312	NA
Dmel_CG45781	0.701004	-2.51168	4.13233	-0.607813	0.543312	NA
Dmel_CG8380	0.701004	-2.51168	4.13233	-0.607813	0.543312	NA
Dmel_CG8985	0.701004	-2.51168	4.13233	-0.607813	0.543312	NA
Dmel_CG9981	0.701004	-2.51168	4.13233	-0.607813	0.543312	NA
Dmel_CG9989	0.701004	-2.51168	4.13233	-0.607813	0.543312	NA
Dmel_CG13202	2.21571	-2.511	2.56564	-0.978702	0.327727	NA
Dmel_CG1155	2.27707	-2.50791	2.5199	-0.995244	0.319617	NA
Dmel_CG17650	2.27707	-2.50791	2.5199	-0.995244	0.319617	NA
Dmel_CG11440	199.286	-2.50385	0.329144	-7.60714	2.80217e-14	2.31691e-12
Dmel_CG8799	337.223	-2.50049	0.335146	-7.46088	8.5944e-14	6.71848e-12
Dmel_CG4145	2082.98	-2.50031	0.26398	-9.4716	2.75599e-21	5.26639e-19
Dmel_CG1004	9.37847	-2.49936	1.26356	-1.97803	0.0479255	0.137784
Dmel_CG34264	0.694334	-2.49854	4.14779	-0.60238	0.546921	NA
Dmel_CG17119	39.9846	-2.4954	0.654991	-3.80983	0.000139064	0.00145475
Dmel_CG31454	2.2337	-2.49002	2.55861	-0.973193	0.330457	NA
Dmel_CG10501	81.6923	-2.48443	0.48543	-5.11799	3.08815e-07	7.08133e-06
Dmel_CG11388	103.891	-2.47943	0.453152	-5.47152	4.46201e-08	1.27896e-06
Dmel_CG32201	8.64093	-2.47863	1.39493	-1.77688	0.0755882	0.189489
Dmel_CG15267	155.556	-2.4785	0.373113	-6.64277	3.07836e-11	1.62398e-09
Dmel_CG2979	19033.8	-2.47807	0.220181	-11.2547	2.19648e-29	9.94079e-27
Dmel_CG8421	341.22	-2.47705	0.274981	-9.00807	2.09713e-19	3.33949e-17
Dmel_CG43351	2.19957	-2.47597	2.63825	-0.938489	0.347993	NA
Dmel_CG10810	271.057	-2.47424	2.99189	-0.826985	0.408246	0.586747
Dmel_CG11125	158.756	-2.46622	0.382912	-6.44071	1.18917e-10	5.43921e-09
Dmel_CG31015	222.369	-2.4662	0.927362	-2.65937	0.00782864	0.0361085
Dmel_CG33258	8.53181	-2.46584	1.30485	-1.88976	0.0587907	0.158975
Dmel_CG17778	0.677201	-2.46374	4.18889	-0.588161	0.556425	NA
Dmel_CG14162	470.765	-2.45978	0.256232	-9.59981	8.00937e-22	1.67982e-19
Dmel_CG11671	2.1562	-2.45658	2.55502	-0.961472	0.336315	NA
Dmel_CG32719	60.2826	-2.45609	0.573682	-4.28128	1.85822e-05	0.000261092
Dmel_CG4066	76.4891	-2.45478	1.56472	-1.56883	0.116688	0.257019
Dmel_CG3074	336.027	-2.44787	0.300772	-8.13861	3.99851e-16	4.46535e-14
Dmel_CG12066	25.9914	-2.44408	0.762644	-3.20475	0.00135181	0.00916733
Dmel_CG13138	27.7513	-2.43814	0.749915	-3.25122	0.0011491	0.00800091
Dmel_CG7781	92.7616	-2.43701	0.457225	-5.33001	9.82058e-08	2.61064e-06
Dmel_CG15599	14.8027	-2.43157	1.04316	-2.33097	0.0197552	0.0722564
Dmel_CG11378	115.982	-2.42836	0.449592	-5.40126	6.61755e-08	1.81224e-06
Dmel_CG15484	13.0451	-2.42606	1.15408	-2.10216	0.0355397	0.110487
Dmel_CG10283	220.951	-2.42086	0.351651	-6.88427	5.80842e-12	3.30772e-10
Dmel_CG13321	48.9807	-2.42031	0.664896	-3.64013	0.000272498	0.00254974
Dmel_CG5958	770.442	-2.41957	0.299829	-8.06982	7.03994e-16	7.3825e-14
Dmel_CG1148	2.10476	-2.41935	2.58253	-0.936812	0.348855	NA
Dmel_CG12477	2.16611	-2.41645	2.59784	-0.930177	0.352279	NA
Dmel_CG6524	7983.78	-2.41634	0.950181	-2.54303	0.0109897	0.0465002
Dmel_CG1503	40.4657	-2.415	0.636859	-3.79204	0.000149414	0.00153685
Dmel_CG42284	0.654627	-2.41408	4.24703	-0.568417	0.569752	NA
Dmel_CG1722	0.649564	-2.40764	4.69877	-0.512397	0.608373	NA
Dmel_CG6118	0.649564	-2.40764	4.69877	-0.512397	0.608373	NA
Dmel_CG10446	0.649564	-2.40764	4.69877	-0.512397	0.608373	NA
Dmel_CG11841	0.649564	-2.40764	4.69877	-0.512397	0.608373	NA
Dmel_CG14193	0.649564	-2.40764	4.69877	-0.512397	0.608373	NA
Dmel_CG14274	0.649564	-2.40764	4.69877	-0.512397	0.608373	NA
Dmel_CG14358	0.649564	-2.40764	4.69877	-0.512397	0.608373	NA
Dmel_CG14692	0.649564	-2.40764	4.69877	-0.512397	0.608373	NA
Dmel_CG15153	0.649564	-2.40764	4.69877	-0.512397	0.608373	NA
Dmel_CG15829	0.649564	-2.40764	4.69877	-0.512397	0.608373	NA
Dmel_CG18585	0.649564	-2.40764	4.69877	-0.512397	0.608373	NA
Dmel_CG30192	0.649564	-2.40764	4.69877	-0.512397	0.608373	NA
Dmel_CG30280	0.649564	-2.40764	4.69877	-0.512397	0.608373	NA
Dmel_CG34115	0.649564	-2.40764	4.69877	-0.512397	0.608373	NA
Dmel_CG42598	0.649564	-2.40764	4.69877	-0.512397	0.608373	NA
Dmel_CG43277	0.649564	-2.40764	4.69877	-0.512397	0.608373	NA
Dmel_CG6690	0.649564	-2.40764	4.69877	-0.512397	0.608373	NA
Dmel_CG9361	0.649564	-2.40764	4.69877	-0.512397	0.608373	NA
Dmel_CG5582	78.2762	-2.40726	0.49	-4.91278	8.97953e-07	1.84284e-05
Dmel_CG31975	2.33738	-2.40686	2.49984	-0.962809	0.335643	NA
Dmel_CG17177	0.648284	-2.39786	4.26501	-0.562216	0.573969	NA
Dmel_CG42362	43.9027	-2.39221	0.608828	-3.92921	8.52251e-05	0.000960486
Dmel_CG42363	43.9027	-2.39221	0.608828	-3.92921	8.52251e-05	0.000960486
Dmel_CG10374	121.477	-2.39187	0.482458	-4.95768	7.13411e-07	1.50728e-05
Dmel_CG4860	229.904	-2.38704	0.307716	-7.75728	8.67734e-15	7.77255e-13
Dmel_CG15351	1470.82	-2.38529	0.288597	-8.26514	1.39529e-16	1.70628e-14
Dmel_CG14834	1268.61	-2.38503	0.293318	-8.13122	4.24975e-16	4.68508e-14
Dmel_CG18234	12.4687	-2.38239	1.08584	-2.19404	0.0282325	0.093879
Dmel_CG11409	82.6497	-2.37257	0.465609	-5.09564	3.47571e-07	7.86516e-06
Dmel_CG30089	61.3486	-2.36718	0.53612	-4.41539	1.00828e-05	0.000156251
Dmel_CG11449	0.641493	-2.36658	4.73915	-0.499368	0.61752	NA
Dmel_CG13144	0.641493	-2.36658	4.73915	-0.499368	0.61752	NA
Dmel_CG13810	0.641493	-2.36658	4.73915	-0.499368	0.61752	NA
Dmel_CG14564	0.641493	-2.36658	4.73915	-0.499368	0.61752	NA
Dmel_CG15592	0.641493	-2.36658	4.73915	-0.499368	0.61752	NA
Dmel_CG16888	0.641493	-2.36658	4.73915	-0.499368	0.61752	NA
Dmel_CG32220	0.641493	-2.36658	4.73915	-0.499368	0.61752	NA
Dmel_CG33752	0.641493	-2.36658	4.73915	-0.499368	0.61752	NA
Dmel_CG33818	0.641493	-2.36658	4.73915	-0.499368	0.61752	NA
Dmel_CG33821	0.641493	-2.36658	4.73915	-0.499368	0.61752	NA
Dmel_CG33824	0.641493	-2.36658	4.73915	-0.499368	0.61752	NA
Dmel_CG33827	0.641493	-2.36658	4.73915	-0.499368	0.61752	NA
Dmel_CG33830	0.641493	-2.36658	4.73915	-0.499368	0.61752	NA
Dmel_CG42830	0.641493	-2.36658	4.73915	-0.499368	0.61752	NA
Dmel_CG5379	0.641493	-2.36658	4.73915	-0.499368	0.61752	NA
Dmel_CG6496	0.641493	-2.36658	4.73915	-0.499368	0.61752	NA
Dmel_CG9930	0.641493	-2.36658	4.73915	-0.499368	0.61752	NA
Dmel_CG13804	1566.69	-2.36215	0.701076	-3.36932	0.000753533	0.00579574
Dmel_CG4786	81.9094	-2.36143	0.464322	-5.08577	3.66147e-07	8.24214e-06
Dmel_CG13936	12.6613	-2.36126	1.18381	-1.99463	0.0460831	0.134192
Dmel_CG3880	2.07131	-2.35929	2.61531	-0.902108	0.366999	NA
Dmel_CG42568	10.3724	-2.3578	1.19367	-1.97525	0.0482395	0.138363
Dmel_CG10236	2009.33	-2.35338	0.241173	-9.75805	1.70398e-22	3.75707e-20
Dmel_CG8129	4.10848	-2.35275	1.82213	-1.29121	0.196631	NA
Dmel_CG15457	715.983	-2.3444	0.302712	-7.74468	9.58255e-15	8.49488e-13
Dmel_CG15864	4.06511	-2.34361	1.82856	-1.28167	0.199958	NA
Dmel_CG6164	4.13454	-2.34215	1.88631	-1.24165	0.214364	NA
Dmel_CG32476	10.124	-2.34142	1.18393	-1.97767	0.0479662	0.137855
Dmel_CG9154	122.27	-2.33807	0.442192	-5.28745	1.24032e-07	3.20285e-06
Dmel_CG10652	4201.15	-2.33689	0.245943	-9.50173	2.06436e-21	4.12823e-19
Dmel_CG45089	276.981	-2.33662	0.299005	-7.81466	5.51119e-15	5.15117e-13
Dmel_CG2993	20.2158	-2.33342	0.850786	-2.74267	0.00609422	0.0297214
Dmel_CG42773	19.7581	-2.33127	0.909063	-2.56448	0.0103332	0.0445164
Dmel_CG14301	4.09117	-2.3305	1.94638	-1.19735	0.23117	NA
Dmel_CG43657	182.899	-2.32987	0.330437	-7.05086	1.77812e-12	1.11606e-10
Dmel_CG11101	56.8073	-2.32912	0.618795	-3.76395	0.000167248	0.00168206
Dmel_CG2861	16.1494	-2.32265	0.97407	-2.38448	0.0171034	0.064904
Dmel_CG42398	32.1366	-2.32162	0.69117	-3.35897	0.000782322	0.00596041
Dmel_CG6041	6.03354	-2.31955	1.54731	-1.49909	0.133851	NA
Dmel_CG1801	54.0184	-2.3185	0.560621	-4.13559	3.54041e-05	0.000451023
Dmel_CG46307	4.11033	-2.31413	2.2126	-1.04589	0.295613	NA
Dmel_CG3759	6.02547	-2.31324	1.51946	-1.52241	0.127907	NA
Dmel_CG1046	13.9672	-2.31315	1.00894	-2.29266	0.0218678	0.0779929
Dmel_CG13250	0.618339	-2.31234	4.36667	-0.529544	0.596428	NA
Dmel_CG16956	33.5521	-2.30966	0.739127	-3.12486	0.00177892	0.0113732
Dmel_CG14221	7.92158	-2.30511	1.38476	-1.66463	0.0959867	0.224474
Dmel_CG15611	64.9148	-2.30198	0.531986	-4.32714	1.51055e-05	0.000221282
Dmel_CG1478	13228.4	-2.29983	0.88899	-2.58702	0.00968107	0.0423651
Dmel_CG33469	2.01179	-2.29935	2.61277	-0.880044	0.378836	NA
Dmel_CG31098	277.432	-2.29541	0.294144	-7.8037	6.01195e-15	5.55879e-13
Dmel_CG30108	41.7518	-2.29495	0.613034	-3.7436	0.000181404	0.00179092
Dmel_CG11426	19.7447	-2.29473	0.854061	-2.68684	0.00721311	0.0338937
Dmel_CG31248	3.50229	-2.29246	2.0404	-1.12354	0.26121	NA
Dmel_CG4394	2.0348	-2.29191	2.64531	-0.866404	0.386269	NA
Dmel_CG18231	9.79925	-2.28443	1.19437	-1.91267	0.0557907	0.153322
Dmel_CG7283	12847.2	-2.28407	0.228417	-9.99956	1.53077e-23	3.76089e-21
Dmel_CG9595	3.87666	-2.28267	1.93278	-1.18103	0.237592	NA
Dmel_CG2837	3.91079	-2.28257	1.89275	-1.20595	0.227835	NA
Dmel_CG9444	6.29617	-2.28158	1.52193	-1.49913	0.133839	0.283667
Dmel_CG7675	127.872	-2.27992	0.393817	-5.78929	7.06858e-09	2.34682e-07
Dmel_CG18466	249.083	-2.27769	0.350411	-6.50007	8.02821e-11	3.96751e-09
Dmel_CG32212	25.3257	-2.2741	0.778907	-2.9196	0.00350482	0.0194438
Dmel_CG18446	1359.48	-2.26838	0.217002	-10.4533	1.41568e-25	4.0578e-23
Dmel_CG31019	10.1168	-2.26734	1.28026	-1.771	0.0765606	0.19108
Dmel_CG9573	5.72422	-2.26544	1.63624	-1.38454	0.166195	NA
Dmel_CG44012	356.342	-2.26473	0.281569	-8.04323	8.74992e-16	9.06512e-14
Dmel_CG1887	38.9078	-2.26281	0.640232	-3.53436	0.000408764	0.0035433
Dmel_CG14015	1.9343	-2.25858	2.6858	-0.840935	0.400384	NA
Dmel_CG15556	1.9343	-2.25858	2.6858	-0.840935	0.400384	NA
Dmel_CG30339	1.96035	-2.25816	2.63962	-0.855486	0.392282	NA
Dmel_CG8864	1.96035	-2.25816	2.63962	-0.855486	0.392282	NA
Dmel_CG9108	0.591069	-2.25341	4.4438	-0.507091	0.612091	NA
Dmel_CG6634	65.1523	-2.25208	0.497161	-4.52989	5.90139e-06	9.66592e-05
Dmel_CG10799	0.590053	-2.25116	4.44679	-0.506243	0.612686	NA
Dmel_CG11626	0.590053	-2.25116	4.44679	-0.506243	0.612686	NA
Dmel_CG11726	0.590053	-2.25116	4.44679	-0.506243	0.612686	NA
Dmel_CG11921	0.590053	-2.25116	4.44679	-0.506243	0.612686	NA
Dmel_CG13228	0.590053	-2.25116	4.44679	-0.506243	0.612686	NA
Dmel_CG14397	0.590053	-2.25116	4.44679	-0.506243	0.612686	NA
Dmel_CG14443	0.590053	-2.25116	4.44679	-0.506243	0.612686	NA
Dmel_CG15666	0.590053	-2.25116	4.44679	-0.506243	0.612686	NA
Dmel_CG17867	0.590053	-2.25116	4.44679	-0.506243	0.612686	NA
Dmel_CG18765	0.590053	-2.25116	4.44679	-0.506243	0.612686	NA
Dmel_CG30432	0.590053	-2.25116	4.44679	-0.506243	0.612686	NA
Dmel_CG32664	0.590053	-2.25116	4.44679	-0.506243	0.612686	NA
Dmel_CG33296	0.590053	-2.25116	4.44679	-0.506243	0.612686	NA
Dmel_CG34038	0.590053	-2.25116	4.44679	-0.506243	0.612686	NA
Dmel_CG4017	0.590053	-2.25116	4.44679	-0.506243	0.612686	NA
Dmel_CG43093	0.590053	-2.25116	4.44679	-0.506243	0.612686	NA
Dmel_CG43318	0.590053	-2.25116	4.44679	-0.506243	0.612686	NA
Dmel_CG5361	0.590053	-2.25116	4.44679	-0.506243	0.612686	NA
Dmel_CG9289	0.590053	-2.25116	4.44679	-0.506243	0.612686	NA
Dmel_CG43233	0.590053	-2.25116	4.44679	-0.506243	0.612686	NA
Dmel_CG14575	0.590053	-2.25116	4.44679	-0.506242	0.612687	NA
Dmel_CG31121	53.7202	-2.24427	0.543382	-4.1302	3.62453e-05	0.00045979
Dmel_CG13114	2059.68	-2.24249	0.66094	-3.39288	0.000691617	0.00541148
Dmel_CG33003	0.584922	-2.23968	4.46203	-0.501943	0.615708	NA
Dmel_CG10694	1.89093	-2.23805	2.68904	-0.832287	0.405247	NA
Dmel_CG15725	5.65664	-2.23713	1.62392	-1.37761	0.168323	NA
Dmel_CG16824	1.95228	-2.23598	2.6774	-0.835131	0.403644	NA
Dmel_CG12342	164.594	-2.23107	0.347241	-6.42515	1.31744e-10	5.86976e-09
Dmel_CG11213	14657.2	-2.22793	0.914517	-2.43619	0.0148431	0.0583629
Dmel_CG43374	16.3039	-2.21928	0.937884	-2.36627	0.0179686	0.0675313
Dmel_CG6113	179.683	-2.21911	0.395202	-5.61514	1.96407e-08	6.09713e-07
Dmel_CG3246	3.79177	-2.21868	1.86212	-1.19148	0.233464	NA
Dmel_CG6921	211.032	-2.21564	0.340785	-6.50157	7.94866e-11	3.9509e-09
Dmel_CG15152	1.90891	-2.21552	2.68037	-0.826573	0.408479	NA
Dmel_CG13704	1.88286	-2.21546	2.68439	-0.825311	0.409195	NA
Dmel_CG43064	19.7951	-2.21245	0.866966	-2.55195	0.0107122	0.0456213
Dmel_CG9907	4.23962	-2.2104	1.89364	-1.16728	0.243099	NA
Dmel_CG33926	9.52003	-2.20905	1.20535	-1.8327	0.0668466	0.174398
Dmel_CG7142	3.71427	-2.2074	1.96487	-1.12344	0.261252	NA
Dmel_CG11069	33.9128	-2.20244	0.671369	-3.28053	0.00103614	0.00736952
Dmel_CG13113	135.855	-2.2011	0.468656	-4.69663	2.6449e-06	4.77804e-05
Dmel_CG4462	28.1607	-2.19722	0.72859	-3.01571	0.00256379	0.0152357
Dmel_CG6199	1397.61	-2.19694	0.232168	-9.4627	3.00105e-21	5.61001e-19
Dmel_CG4476	1480.5	-2.19642	0.201371	-10.9073	1.06334e-27	4.57185e-25
Dmel_CG13890	443.165	-2.19456	0.255322	-8.59525	8.30857e-18	1.13405e-15
Dmel_CG12351	1.83949	-2.19429	2.75788	-0.795644	0.426239	NA
Dmel_CG33990	1.83949	-2.19429	2.75788	-0.795644	0.426239	NA
Dmel_CG9891	16.861	-2.1937	0.980505	-2.23732	0.0252657	0.0867305
Dmel_CG9232	55.4808	-2.19362	0.592975	-3.69934	0.000216161	0.00208149
Dmel_CG11124	10.6915	-2.19336	1.13294	-1.93598	0.0528697	0.147672
Dmel_CG33907	709.194	-2.18823	1.16105	-1.8847	0.0594703	0.160058
Dmel_CG9008	90.0746	-2.18062	0.434909	-5.01397	5.33174e-07	1.17257e-05
Dmel_CG10505	7.37778	-2.17481	1.3613	-1.5976	0.110133	0.246064
Dmel_CG10877	90.3962	-2.17237	0.426054	-5.09881	3.41802e-07	7.75502e-06
Dmel_CG5791	1.83142	-2.17136	2.69794	-0.804824	0.420921	NA
Dmel_CG6891	512.271	-2.16507	0.296151	-7.3107	2.65754e-13	1.98715e-11
Dmel_CG9506	441.212	-2.16063	0.338691	-6.37935	1.77841e-10	7.8023e-09
Dmel_CG42259	309.794	-2.15392	0.316678	-6.8016	1.03461e-11	5.66664e-10
Dmel_CG13478	25.5687	-2.15301	0.761858	-2.826	0.00471326	0.02424
Dmel_CG17075	8.19765	-2.15141	1.3837	-1.55483	0.119987	0.261871
Dmel_CG11381	1098.6	-2.15098	0.728842	-2.95123	0.00316508	0.0179766
Dmel_CG13786	9.19373	-2.14996	1.25388	-1.71464	0.0864109	0.208266
Dmel_CG8508	1.8494	-2.14869	2.68889	-0.799098	0.424234	NA
Dmel_CG31020	5.55628	-2.14826	1.63634	-1.31284	0.189236	NA
Dmel_CG4095	18.2133	-2.14819	0.940762	-2.28346	0.0224031	0.0793655
Dmel_CG6071	14.6031	-2.14655	0.98334	-2.18291	0.0290422	0.0960146
Dmel_CG9119	61.8254	-2.14478	0.510284	-4.20311	2.6327e-05	0.000350443
Dmel_CG18095	1.86533	-2.13906	2.76307	-0.774159	0.438837	NA
Dmel_CG2781	128.866	-2.13672	0.404261	-5.28551	1.25354e-07	3.22729e-06
Dmel_CG12984	1.67449	-2.13564	2.79365	-0.764464	0.444591	NA
Dmel_CG14039	99.6348	-2.13385	0.46323	-4.60646	4.09574e-06	7.01579e-05
Dmel_CG15570	2743.27	-2.13063	1.00447	-2.12114	0.0339101	0.107233
Dmel_CG6604	11.2561	-2.13055	1.13217	-1.88183	0.0598585	0.160901
Dmel_CG32718	0.538613	-2.12897	4.61143	-0.461673	0.644316	NA
Dmel_CG34137	0.538613	-2.12897	4.61143	-0.461673	0.644316	NA
Dmel_CG10972	0.538613	-2.12897	4.61143	-0.461673	0.644316	NA
Dmel_CG11512	0.538613	-2.12897	4.61143	-0.461673	0.644316	NA
Dmel_CG12519	0.538613	-2.12897	4.61143	-0.461673	0.644316	NA
Dmel_CG13296	0.538613	-2.12897	4.61143	-0.461673	0.644316	NA
Dmel_CG13566	0.538613	-2.12897	4.61143	-0.461673	0.644316	NA
Dmel_CG14639	0.538613	-2.12897	4.61143	-0.461673	0.644316	NA
Dmel_CG15036	0.538613	-2.12897	4.61143	-0.461673	0.644316	NA
Dmel_CG15434	0.538613	-2.12897	4.61143	-0.461673	0.644316	NA
Dmel_CG17030	0.538613	-2.12897	4.61143	-0.461673	0.644316	NA
Dmel_CG17687	0.538613	-2.12897	4.61143	-0.461673	0.644316	NA
Dmel_CG18107	0.538613	-2.12897	4.61143	-0.461673	0.644316	NA
Dmel_CG18179	0.538613	-2.12897	4.61143	-0.461673	0.644316	NA
Dmel_CG2560	0.538613	-2.12897	4.61143	-0.461673	0.644316	NA
Dmel_CG30289	0.538613	-2.12897	4.61143	-0.461673	0.644316	NA
Dmel_CG30472	0.538613	-2.12897	4.61143	-0.461673	0.644316	NA
Dmel_CG32335	0.538613	-2.12897	4.61143	-0.461673	0.644316	NA
Dmel_CG32750	0.538613	-2.12897	4.61143	-0.461673	0.644316	NA
Dmel_CG33757	0.538613	-2.12897	4.61143	-0.461673	0.644316	NA
Dmel_CG33983	0.538613	-2.12897	4.61143	-0.461673	0.644316	NA
Dmel_CG34435	0.538613	-2.12897	4.61143	-0.461673	0.644316	NA
Dmel_CG3853	0.538613	-2.12897	4.61143	-0.461673	0.644316	NA
Dmel_CG42615	0.538613	-2.12897	4.61143	-0.461673	0.644316	NA
Dmel_CG42633	0.538613	-2.12897	4.61143	-0.461673	0.644316	NA
Dmel_CG4362	0.538613	-2.12897	4.61143	-0.461673	0.644316	NA
Dmel_CG44040	0.538613	-2.12897	4.61143	-0.461673	0.644316	NA
Dmel_CG44954	0.538613	-2.12897	4.61143	-0.461673	0.644316	NA
Dmel_CG5213	0.538613	-2.12897	4.61143	-0.461673	0.644316	NA
Dmel_CG6639	0.538613	-2.12897	4.61143	-0.461673	0.644316	NA
Dmel_CG7385	0.538613	-2.12897	4.61143	-0.461673	0.644316	NA
Dmel_CG9307	0.538613	-2.12897	4.61143	-0.461673	0.644316	NA
Dmel_CG31821	1.77998	-2.12604	2.72417	-0.780437	0.435134	NA
Dmel_CG9507	1.77998	-2.12604	2.72417	-0.780437	0.435134	NA
Dmel_CG2969	334.892	-2.12274	0.300017	-7.07541	1.49004e-12	9.49097e-11
Dmel_CG11129	6651.95	-2.11842	0.198503	-10.672	1.37673e-26	4.55328e-24
Dmel_CG11142	1.80462	-2.1177	2.98981	-0.708307	0.478755	NA
Dmel_CG17193	0.533926	-2.1165	4.62815	-0.457311	0.647447	NA
Dmel_CG11144	37.9918	-2.11497	0.652125	-3.2432	0.00118195	0.00817667
Dmel_CG10692	50.1271	-2.11391	0.555494	-3.80546	0.000141538	0.00147347
Dmel_CG31016	8.88441	-2.11266	1.23402	-1.71201	0.0868951	0.20901
Dmel_CG14406	0.532058	-2.11134	4.63497	-0.455525	0.648732	NA
Dmel_CG42268	56.3168	-2.10954	0.515492	-4.09229	4.27141e-05	0.000533864
Dmel_CG32642	905.313	-2.10927	0.866015	-2.4356	0.0148672	0.0584291
Dmel_CG13323	1.88427	-2.10912	2.7455	-0.76821	0.442362	NA
Dmel_CG42540	0.53037	-2.10651	4.64126	-0.453866	0.649925	NA
Dmel_CG9173	3.604	-2.10614	2.0175	-1.04393	0.296517	NA
Dmel_CG6167	21.9717	-2.10413	0.830699	-2.53296	0.0113105	0.0476059
Dmel_CG14624	1.79796	-2.10307	2.71476	-0.77468	0.438529	NA
Dmel_CG3565	1.79796	-2.10307	2.71476	-0.77468	0.438529	NA
Dmel_CG42747	44.1649	-2.10295	0.599218	-3.50948	0.000448978	0.00384156
Dmel_CG3748	1.7719	-2.10224	2.80663	-0.749025	0.453842	NA
Dmel_CG2985	10256	-2.10122	0.202365	-10.3833	2.95236e-25	8.18946e-23
Dmel_CG7991	5.19238	-2.09745	1.59183	-1.31763	0.187626	NA
Dmel_CG32695	0.52723	-2.09606	4.6539	-0.450387	0.652431	NA
Dmel_CG13954	3.60405	-2.09603	1.89966	-1.10337	0.269866	NA
Dmel_CG33485	0.527086	-2.09515	4.65473	-0.450112	0.65263	NA
Dmel_CG18372	10.3089	-2.09061	1.18175	-1.76908	0.0768806	0.191567
Dmel_CG34057	9.21804	-2.0904	1.3257	-1.57683	0.114834	0.253585
Dmel_CG2069	33.0306	-2.08837	0.658668	-3.1706	0.00152123	0.0100084
Dmel_CG13084	908.851	-2.08747	0.991468	-2.10543	0.0352535	0.110202
Dmel_CG10163	159.884	-2.08698	0.473069	-4.41158	1.02621e-05	0.000158711
Dmel_CG12449	120.811	-2.08616	0.408186	-5.11082	3.20771e-07	7.29711e-06
Dmel_CG9027	1916.21	-2.08448	0.254775	-8.18163	2.8003e-16	3.16839e-14
Dmel_CG9747	233.903	-2.08425	0.347307	-6.00117	1.95896e-09	7.28611e-08
Dmel_CG7463	23.0474	-2.08352	0.809824	-2.57281	0.0100876	0.0436336
Dmel_CG4827	131.42	-2.08217	0.366105	-5.68736	1.29018e-08	4.17078e-07
Dmel_CG15766	31.4552	-2.08164	0.696597	-2.98829	0.00280539	0.0163328
Dmel_CG8419	10.4859	-2.08134	1.14313	-1.82074	0.0686456	0.177743
Dmel_CG1397	1.57804	-2.07298	2.88745	-0.717927	0.472803	NA
Dmel_CG15350	2062.33	-2.07296	0.298306	-6.94912	3.67584e-12	2.15024e-10
Dmel_CG9621	3.47506	-2.07099	1.93336	-1.07119	0.284086	NA
Dmel_CG15068	5.19552	-2.06946	1.5881	-1.3031	0.192539	NA
Dmel_CG34164	4.20642	-2.06902	1.83978	-1.1246	0.260758	NA
Dmel_CG17636	3.44093	-2.06882	2.04667	-1.01082	0.312103	NA
Dmel_CG1600	405.13	-2.06736	0.280663	-7.36601	1.75814e-13	1.32616e-11
Dmel_CG6356	12.2423	-2.06683	1.06021	-1.94946	0.0512406	0.14437
Dmel_CG9184	3.37138	-2.06625	2.04262	-1.01157	0.311745	NA
Dmel_CG9333	7.0809	-2.06479	1.46639	-1.40808	0.159108	0.31778
Dmel_CG4354	5.41476	-2.06234	1.64826	-1.25122	0.210854	NA
Dmel_CG4797	37.9597	-2.06164	0.651988	-3.16208	0.00156647	0.010259
Dmel_CG34347	325.996	-2.06157	0.315778	-6.52854	6.64145e-11	3.32034e-09
Dmel_CG43370	17.203	-2.05954	0.947301	-2.17411	0.0296969	0.0974509
Dmel_CG14691	1.74653	-2.05582	2.75587	-0.745979	0.45568	NA
Dmel_CG30178	1.74652	-2.05579	2.75587	-0.745966	0.455688	NA
Dmel_CG16857	29.0746	-2.05239	0.731871	-2.80431	0.00504247	0.0255685
Dmel_CG11253	18.8206	-2.0516	0.905895	-2.26472	0.02353	0.0821829
Dmel_CG16827	5.27487	-2.04739	1.67717	-1.22074	0.222184	NA
Dmel_CG32199	6.90859	-2.04118	1.40498	-1.45282	0.146274	0.302213
Dmel_CG17604	919.097	-2.04009	0.228157	-8.94159	3.83616e-19	5.78722e-17
Dmel_CG7120	196.377	-2.03675	0.314427	-6.47767	9.31514e-11	4.39611e-09
Dmel_CG43965	44.1567	-2.03663	0.609421	-3.34191	0.000832054	0.00626518
Dmel_CG6553	3.41555	-2.03383	1.92659	-1.05566	0.291122	NA
Dmel_CG32706	3.34612	-2.03152	2.03551	-0.998042	0.318259	NA
Dmel_CG8620	1.6771	-2.03053	2.83618	-0.715939	0.474029	NA
Dmel_CG3206	1.73845	-2.0299	2.77368	-0.731846	0.464262	NA
Dmel_CG7678	1.73845	-2.0299	2.77368	-0.731846	0.464262	NA
Dmel_CG8774	1.73845	-2.0299	2.77368	-0.731846	0.464262	NA
Dmel_CG1411	131.391	-2.0291	0.419222	-4.84015	1.29739e-06	2.52977e-05
Dmel_CG15274	1.6357	-2.02837	2.80168	-0.723985	0.469075	NA
Dmel_CG5224	140.936	-2.02536	0.355935	-5.69026	1.26846e-08	4.11603e-07
Dmel_CG10843	8.3179	-2.02484	1.38585	-1.46108	0.143994	0.299233
Dmel_CG42334	7.43926	-2.02438	1.33436	-1.51712	0.129235	0.276566
Dmel_CG11606	189.405	-2.02381	0.359284	-5.63292	1.77188e-08	5.52044e-07
Dmel_CG7584	10.186	-2.02254	1.20101	-1.68403	0.0921758	0.217692
Dmel_CG3713	1.4067	-2.02208	2.96611	-0.681727	0.495411	NA
Dmel_CG42600	3943.84	-2.01582	0.190484	-10.5827	3.58634e-26	1.14218e-23
Dmel_CG14704	29.2111	-2.01093	0.697774	-2.88192	0.00395265	0.0212829
Dmel_CG5961	68.7906	-2.0108	0.509757	-3.94462	7.99258e-05	0.000911514
Dmel_CG13313	3.36411	-2.00933	1.94064	-1.03539	0.300485	NA
Dmel_CG31176	16.9606	-2.00915	0.914824	-2.19621	0.0280766	0.093469
Dmel_CG13511	1.69508	-2.00627	2.82594	-0.709948	0.477736	NA
Dmel_CG1213	1.66902	-2.00418	2.79021	-0.718292	0.472577	NA
Dmel_CG8550	1.66902	-2.00418	2.79021	-0.718292	0.472577	NA
Dmel_CG10952	3.54557	-2.00393	1.98608	-1.00899	0.31298	NA
Dmel_CG6976	5.27663	-2.00305	1.5842	-1.26439	0.206088	NA
Dmel_CG9554	251.888	-2.00005	0.318231	-6.28489	3.28079e-10	1.39661e-08
Dmel_CG3244	5.12055	-1.9982	1.68199	-1.18799	0.234835	NA
Dmel_CG10537	0.487173	-1.99515	4.86709	-0.409926	0.68186	NA
Dmel_CG10704	0.487173	-1.99515	4.86709	-0.409926	0.68186	NA
Dmel_CG13000	0.487173	-1.99515	4.86709	-0.409926	0.68186	NA
Dmel_CG13253	0.487173	-1.99515	4.86709	-0.409926	0.68186	NA
Dmel_CG13641	0.487173	-1.99515	4.86709	-0.409926	0.68186	NA
Dmel_CG13833	0.487173	-1.99515	4.86709	-0.409926	0.68186	NA
Dmel_CG13856	0.487173	-1.99515	4.86709	-0.409926	0.68186	NA
Dmel_CG14321	0.487173	-1.99515	4.86709	-0.409926	0.68186	NA
Dmel_CG14422	0.487173	-1.99515	4.86709	-0.409926	0.68186	NA
Dmel_CG14445	0.487173	-1.99515	4.86709	-0.409926	0.68186	NA
Dmel_CG14608	0.487173	-1.99515	4.86709	-0.409926	0.68186	NA
Dmel_CG14825	0.487173	-1.99515	4.86709	-0.409926	0.68186	NA
Dmel_CG14928	0.487173	-1.99515	4.86709	-0.409926	0.68186	NA
Dmel_CG15130	0.487173	-1.99515	4.86709	-0.409926	0.68186	NA
Dmel_CG15231	0.487173	-1.99515	4.86709	-0.409926	0.68186	NA
Dmel_CG15870	0.487173	-1.99515	4.86709	-0.409926	0.68186	NA
Dmel_CG1850	0.487173	-1.99515	4.86709	-0.409926	0.68186	NA
Dmel_CG31664	0.487173	-1.99515	4.86709	-0.409926	0.68186	NA
Dmel_CG33093	0.487173	-1.99515	4.86709	-0.409926	0.68186	NA
Dmel_CG33306	0.487173	-1.99515	4.86709	-0.409926	0.68186	NA
Dmel_CG3966	0.487173	-1.99515	4.86709	-0.409926	0.68186	NA
Dmel_CG42287	0.487173	-1.99515	4.86709	-0.409926	0.68186	NA
Dmel_CG42292	0.487173	-1.99515	4.86709	-0.409926	0.68186	NA
Dmel_CG42596	0.487173	-1.99515	4.86709	-0.409926	0.68186	NA
Dmel_CG45011	0.487173	-1.99515	4.86709	-0.409926	0.68186	NA
Dmel_CG4739	0.487173	-1.99515	4.86709	-0.409926	0.68186	NA
Dmel_CG7918	0.487173	-1.99515	4.86709	-0.409926	0.68186	NA
Dmel_CG7936	0.487173	-1.99515	4.86709	-0.409926	0.68186	NA
Dmel_CG8335	0.487173	-1.99515	4.86709	-0.409926	0.68186	NA
Dmel_CG9541	0.487173	-1.99515	4.86709	-0.409926	0.68186	NA
Dmel_CG4604	16.8022	-1.99423	0.923577	-2.15925	0.0308308	0.100157
Dmel_CG17219	112.145	-1.99119	0.412216	-4.83046	1.3622e-06	2.62048e-05
Dmel_CG4869	121.252	-1.98753	0.402329	-4.94007	7.80957e-07	1.63393e-05
Dmel_CG18069	1124.45	-1.98586	0.213879	-9.28496	1.61764e-20	2.83879e-18
Dmel_CG30438	19.1944	-1.98434	0.849709	-2.33532	0.0195267	0.0716646
Dmel_CG30334	6.63268	-1.98414	1.39991	-1.41733	0.156385	0.314489
Dmel_CG9081	39.8759	-1.98144	0.602649	-3.28788	0.00100944	0.00721983
Dmel_CG42693	1.68701	-1.98039	2.77994	-0.712385	0.476227	NA
Dmel_CG34056	9.96523	-1.9789	1.1556	-1.71244	0.086816	0.208906
Dmel_CG12952	7.32445	-1.97786	1.45712	-1.35737	0.174664	0.337816
Dmel_CG4181	6.61726	-1.97728	1.39966	-1.41268	0.157749	0.316412
Dmel_CG14257	1.88859	-1.97679	2.65621	-0.744213	0.456748	NA
Dmel_CG14792	28102	-1.97429	0.24675	-8.00117	1.23238e-15	1.24674e-13
Dmel_CG4009	1136.65	-1.97204	0.323971	-6.08708	1.14985e-09	4.39448e-08
Dmel_CG7912	4.99161	-1.97149	1.61299	-1.22226	0.221611	NA
Dmel_CG6785	27.8063	-1.96938	0.709052	-2.77749	0.00547809	0.0273554
Dmel_CG7490	23937.1	-1.96624	0.237726	-8.27104	1.32799e-16	1.65498e-14
Dmel_CG4899	3.26527	-1.96497	1.98617	-0.989324	0.322505	NA
Dmel_CG12744	451.608	-1.95928	0.302718	-6.4723	9.65215e-11	4.48642e-09
Dmel_CG10002	3.16012	-1.95896	2.04242	-0.959138	0.337489	NA
Dmel_CG15293	13.1167	-1.95829	1.09015	-1.79635	0.0724389	0.184181
Dmel_CG7021	1.69184	-1.9578	2.77683	-0.705049	0.480779	NA
Dmel_CG14102	103.127	-1.95766	0.414498	-4.72296	2.32439e-06	4.27996e-05
Dmel_CG17265	146.911	-1.95641	0.398802	-4.90572	9.30862e-07	1.89231e-05
Dmel_CG10776	77.1901	-1.95618	0.460754	-4.24559	2.18015e-05	0.00029832
Dmel_CG32096	110.337	-1.95574	0.429661	-4.55182	5.31842e-06	8.92874e-05
Dmel_CG33082	52.9238	-1.95571	0.559292	-3.49676	0.000470941	0.0040016
Dmel_CG13540	1.61758	-1.95327	2.8143	-0.694053	0.487649	NA
Dmel_CG2857	40.381	-1.95307	0.681224	-2.86701	0.00414375	0.0220058
Dmel_CG42336	338.937	-1.95166	0.295356	-6.60784	3.8997e-11	2.03234e-09
Dmel_CG34166	12.5416	-1.951	1.05115	-1.85606	0.0634456	0.167867
Dmel_CG13997	250.303	-1.95083	0.358253	-5.44538	5.16955e-08	1.45747e-06
Dmel_CG15673	53.3855	-1.95041	0.574255	-3.39642	0.000682726	0.00535165
Dmel_CG1632	19.7434	-1.95005	0.863797	-2.25753	0.023975	0.0832976
Dmel_CG17579	8.11466	-1.94435	1.35163	-1.43853	0.150284	0.307396
Dmel_CG12517	56.1744	-1.94292	0.586155	-3.31468	0.00091748	0.00675463
Dmel_CG17801	40.5254	-1.94226	0.601973	-3.2265	0.00125316	0.00861383
Dmel_CG14049	154.533	-1.94143	0.346943	-5.59582	2.19579e-08	6.76759e-07
Dmel_CG44532	3.18373	-1.94134	2.06976	-0.937954	0.348268	NA
Dmel_CG14945	7.7139	-1.93945	1.3714	-1.41421	0.1573	0.315738
Dmel_CG14275	49.9507	-1.93627	0.573326	-3.37726	0.00073212	0.00567673
Dmel_CG8327	1147.45	-1.93492	0.252254	-7.67054	1.71273e-14	1.45819e-12
Dmel_CG32475	117.745	-1.93208	0.377572	-5.11712	3.10238e-07	7.09503e-06
Dmel_CG3216	1.63557	-1.92924	2.80357	-0.688136	0.491367	NA
Dmel_CG42819	1.63557	-1.92924	2.80357	-0.688136	0.491367	NA
Dmel_CG13252	239.008	-1.91822	0.295261	-6.49669	8.21043e-11	4.01145e-09
Dmel_CG14208	1.63323	-1.91543	2.80427	-0.683041	0.494581	NA
Dmel_CG13949	1.6557	-1.91375	2.86177	-0.668732	0.503666	NA
Dmel_CG10730	6.36007	-1.91195	1.45481	-1.31423	0.18877	0.35566
Dmel_CG12051	3110.97	-1.91101	0.211232	-9.047	1.46949e-19	2.38418e-17
Dmel_CG10079	328.799	-1.90863	0.273582	-6.97643	3.0278e-12	1.80806e-10
Dmel_CG15101	144.333	-1.90673	0.395368	-4.82268	1.4164e-06	2.70283e-05
Dmel_CG15326	18.9264	-1.90533	0.869679	-2.19084	0.0284634	0.0944276
Dmel_CG13003	64.463	-1.9046	0.501393	-3.79863	0.000145499	0.00150741
Dmel_CG3322	597.825	-1.90381	0.254437	-7.48243	7.29588e-14	5.80901e-12
Dmel_CG31009	369.976	-1.90236	0.299322	-6.35559	2.07627e-10	9.01711e-09
Dmel_CG30447	1.56614	-1.90059	2.856	-0.665473	0.505748	NA
Dmel_CG9236	1.56614	-1.90059	2.856	-0.665473	0.505748	NA
Dmel_CG7637	253.695	-1.89966	0.321447	-5.90973	3.42673e-09	1.21261e-07
Dmel_CG12275	4.71642	-1.89933	1.653	-1.14902	0.250546	NA
Dmel_CG10337	98.7173	-1.89873	0.466685	-4.06854	4.73081e-05	0.000580317
Dmel_CG2381	4.73964	-1.89749	1.64288	-1.15498	0.248097	NA
Dmel_CG6044	3.38794	-1.89711	2.08696	-0.909027	0.363336	NA
Dmel_CG8345	5.15056	-1.89416	1.6027	-1.18185	0.237264	NA
Dmel_CG6704	100.221	-1.89292	0.464229	-4.07757	4.55096e-05	0.000560806
Dmel_CG43112	11.3138	-1.89016	1.25713	-1.50355	0.132697	0.282382
Dmel_CG6959	86.8199	-1.88863	0.427328	-4.41963	9.8868e-06	0.000154016
Dmel_CG42370	3.11615	-1.88819	2.16254	-0.873139	0.382587	NA
Dmel_CG9888	2839.84	-1.8878	0.253817	-7.43763	1.02509e-13	7.94121e-12
Dmel_CG8260	4.63892	-1.88755	1.74384	-1.08241	0.27907	NA
Dmel_CG2507	3.28847	-1.88615	2.07228	-0.910182	0.362726	NA
Dmel_CG9048	12689.3	-1.88302	0.221728	-8.49251	2.02228e-17	2.67532e-15
Dmel_CG6024	3.30989	-1.87722	1.94506	-0.965125	0.334482	NA
Dmel_CG6385	3.14221	-1.87681	1.98485	-0.945568	0.344369	NA
Dmel_CG32847	1.58413	-1.87612	2.84478	-0.659495	0.509578	NA
Dmel_CG34206	1.58413	-1.87612	2.84478	-0.659495	0.509578	NA
Dmel_CG5267	1.58413	-1.87612	2.84478	-0.659495	0.509578	NA
Dmel_CG42272	6.21498	-1.87486	1.45039	-1.29266	0.19613	0.364103
Dmel_CG8991	70.5165	-1.87445	0.512265	-3.65913	0.000253071	0.00238526
Dmel_CG42280	39.6987	-1.87339	0.609732	-3.07249	0.00212281	0.0130666
Dmel_CG6123	1.46492	-1.87204	2.91041	-0.64322	0.520081	NA
Dmel_CG34395	3.01661	-1.87201	2.01383	-0.929575	0.352591	NA
Dmel_CG33099	28.1758	-1.87184	0.701503	-2.66833	0.00762295	0.0354219
Dmel_CG4746	1.55807	-1.87153	2.91898	-0.641157	0.521421	NA
Dmel_CG6220	1.55807	-1.87153	2.91898	-0.641157	0.521421	NA
Dmel_CG6751	680.237	-1.87039	0.260306	-7.18536	6.7028e-13	4.52765e-11
Dmel_CG42340	62.4681	-1.86874	0.50032	-3.73509	0.000187647	0.00183195
Dmel_CG6490	329.439	-1.86752	0.272094	-6.86352	6.71845e-12	3.76647e-10
Dmel_CG32625	129.453	-1.86518	0.40334	-4.62434	3.75792e-06	6.55464e-05
Dmel_CG6776	67.0184	-1.86429	0.484909	-3.8446	0.000120747	0.00129611
Dmel_CG33542	4.57941	-1.85967	1.75596	-1.05907	0.28957	NA
Dmel_CG1921	148.696	-1.85622	0.343482	-5.40412	6.51291e-08	1.78928e-06
Dmel_CG4926	3.16019	-1.85408	2.07541	-0.893357	0.371666	NA
Dmel_CG13822	306.63	-1.85232	0.278796	-6.64401	3.05253e-11	1.62029e-09
Dmel_CG7565	368.696	-1.85186	0.328355	-5.63983	1.70222e-08	5.36169e-07
Dmel_CG11315	5.06291	-1.8493	1.70399	-1.08528	0.277799	NA
Dmel_CG31719	1.54607	-1.84667	2.86884	-0.643699	0.51977	NA
Dmel_CG6519	9345.4	-1.84641	0.298323	-6.1893	6.04329e-10	2.38377e-08
Dmel_CG17380	1.57606	-1.84617	2.90767	-0.634933	0.525472	NA
Dmel_CG10759	1.5147	-1.84565	2.92843	-0.630253	0.528529	NA
Dmel_CG31469	1.5147	-1.84565	2.92843	-0.630253	0.528529	NA
Dmel_CG17921	293.236	-1.84479	0.314889	-5.85854	4.66952e-09	1.63224e-07
Dmel_CG7635	12.1728	-1.84043	1.0581	-1.73937	0.0819701	0.201003
Dmel_CG30115	182.365	-1.84037	0.358399	-5.13499	2.82166e-07	6.59693e-06
Dmel_CG4872	49.0991	-1.83824	0.554706	-3.3139	0.000920033	0.00676185
Dmel_CG1221	3.04743	-1.83703	2.05401	-0.894366	0.371126	NA
Dmel_CG13255	5.87264	-1.83653	1.60618	-1.14342	0.252866	NA
Dmel_CG1971	69.1546	-1.83602	0.48065	-3.81986	0.000133528	0.00140875
Dmel_CG13510	15.8936	-1.83441	0.986347	-1.85981	0.0629129	0.166869
Dmel_CG11597	35.5885	-1.83401	0.627712	-2.92173	0.00348088	0.0193735
Dmel_CG31808	100.737	-1.8321	0.431406	-4.24682	2.16826e-05	0.000297366
Dmel_CG12740	12151	-1.83187	0.226124	-8.10116	5.44362e-16	5.85121e-14
Dmel_CG8816	202.742	-1.82746	0.356844	-5.12116	3.03669e-07	7.00067e-06
Dmel_CG1618	156.07	-1.82741	0.369284	-4.94852	7.47785e-07	1.56834e-05
Dmel_CG46309	9.12605	-1.82667	1.19891	-1.52361	0.127607	0.273843
Dmel_CG1246	11.0894	-1.82515	1.12493	-1.62246	0.104705	0.237891
Dmel_CG31661	121.698	-1.82044	0.460329	-3.95466	7.66444e-05	0.000876417
Dmel_CG9138	1.53269	-1.82039	2.91664	-0.624139	0.532536	NA
Dmel_CG16834	1.53269	-1.82039	2.91664	-0.624139	0.532536	NA
Dmel_CG14866	7.61134	-1.82013	1.30327	-1.39659	0.162536	0.322225
Dmel_CG15418	19.5592	-1.81803	0.914241	-1.98857	0.0467492	0.135581
Dmel_CG33178	1.60186	-1.81692	2.826	-0.642931	0.520269	NA
Dmel_CG34124	2.9699	-1.81662	2.12773	-0.853783	0.393225	NA
Dmel_CG14963	4.50259	-1.81562	1.68687	-1.07632	0.281783	NA
Dmel_CG16713	1.50663	-1.8149	2.90477	-0.624799	0.532103	NA
Dmel_CG31326	1.50663	-1.8149	2.90477	-0.624799	0.532103	NA
Dmel_CG1131	90.8938	-1.81395	0.423505	-4.28317	1.84248e-05	0.000259729
Dmel_CG8790	422.695	-1.81092	0.27485	-6.58876	4.43527e-11	2.28377e-09
Dmel_CG5321	1.60165	-1.80761	2.824	-0.640086	0.522117	NA
Dmel_CG7225	65.3217	-1.80735	0.527204	-3.42817	0.000607656	0.00488339
Dmel_CG15083	210.609	-1.80635	0.311603	-5.79694	6.75356e-09	2.26851e-07
Dmel_CG3837	106.949	-1.80477	0.428813	-4.20876	2.56773e-05	0.000343389
Dmel_CG9538	1.60165	-1.8021	2.82566	-0.637762	0.523629	NA
Dmel_CG1031	696.074	-1.80172	0.25222	-7.14346	9.10136e-13	6.00887e-11
Dmel_CG31013	19.5728	-1.79724	0.836828	-2.14768	0.0317392	0.102449
Dmel_CG14830	22.332	-1.79626	0.828232	-2.16879	0.0300985	0.098372
Dmel_CG9640	12.409	-1.79553	1.09575	-1.63863	0.101291	0.232155
Dmel_CG11887	1132.98	-1.79544	0.235729	-7.61653	2.60588e-14	2.17553e-12
Dmel_CG34392	95.855	-1.79431	0.472058	-3.80103	0.000144093	0.00149645
Dmel_CG12206	26.1869	-1.79394	0.720142	-2.49109	0.0127351	0.0518511
Dmel_CG46397	2.98789	-1.7935	2.02192	-0.887032	0.375062	NA
Dmel_CG13194	91.5337	-1.79323	0.439787	-4.0775	4.55219e-05	0.000560806
Dmel_CG33300	1.52462	-1.78977	2.89294	-0.61867	0.536134	NA
Dmel_CG9098	68.4923	-1.78701	0.471863	-3.78714	0.000152394	0.00156563
Dmel_CG14778	11.9615	-1.78328	1.04917	-1.69971	0.0891848	0.21285
Dmel_CG15573	666.68	-1.77872	1.04487	-1.70233	0.0886934	0.211913
Dmel_CG3168	268.111	-1.77733	0.354082	-5.01953	5.1797e-07	1.14499e-05
Dmel_CG1264	0.427662	-1.77704	4.88038	-0.364118	0.71577	NA
Dmel_CG12780	0.427662	-1.77704	4.88038	-0.364118	0.71577	NA
Dmel_CG13386	0.427662	-1.77704	4.88038	-0.364118	0.71577	NA
Dmel_CG13481	0.427662	-1.77704	4.88038	-0.364118	0.71577	NA
Dmel_CG13794	0.427662	-1.77704	4.88038	-0.364118	0.71577	NA
Dmel_CG14424	0.427662	-1.77704	4.88038	-0.364118	0.71577	NA
Dmel_CG15449	0.427662	-1.77704	4.88038	-0.364118	0.71577	NA
Dmel_CG16978	0.427662	-1.77704	4.88038	-0.364118	0.71577	NA
Dmel_CG17234	0.427662	-1.77704	4.88038	-0.364118	0.71577	NA
Dmel_CG17475	0.427662	-1.77704	4.88038	-0.364118	0.71577	NA
Dmel_CG18125	0.427662	-1.77704	4.88038	-0.364118	0.71577	NA
Dmel_CG18599	0.427662	-1.77704	4.88038	-0.364118	0.71577	NA
Dmel_CG18666	0.427662	-1.77704	4.88038	-0.364118	0.71577	NA
Dmel_CG18745	0.427662	-1.77704	4.88038	-0.364118	0.71577	NA
Dmel_CG18823	0.427662	-1.77704	4.88038	-0.364118	0.71577	NA
Dmel_CG30265	0.427662	-1.77704	4.88038	-0.364118	0.71577	NA
Dmel_CG30288	0.427662	-1.77704	4.88038	-0.364118	0.71577	NA
Dmel_CG31508	0.427662	-1.77704	4.88038	-0.364118	0.71577	NA
Dmel_CG31670	0.427662	-1.77704	4.88038	-0.364118	0.71577	NA
Dmel_CG31809	0.427662	-1.77704	4.88038	-0.364118	0.71577	NA
Dmel_CG31932	0.427662	-1.77704	4.88038	-0.364118	0.71577	NA
Dmel_CG32269	0.427662	-1.77704	4.88038	-0.364118	0.71577	NA
Dmel_CG32270	0.427662	-1.77704	4.88038	-0.364118	0.71577	NA
Dmel_CG33668	0.427662	-1.77704	4.88038	-0.364118	0.71577	NA
Dmel_CG33919	0.427662	-1.77704	4.88038	-0.364118	0.71577	NA
Dmel_CG34173	0.427662	-1.77704	4.88038	-0.364118	0.71577	NA
Dmel_CG34176	0.427662	-1.77704	4.88038	-0.364118	0.71577	NA
Dmel_CG3598	0.427662	-1.77704	4.88038	-0.364118	0.71577	NA
Dmel_CG3868	0.427662	-1.77704	4.88038	-0.364118	0.71577	NA
Dmel_CG41434	0.427662	-1.77704	4.88038	-0.364118	0.71577	NA
Dmel_CG42592	0.427662	-1.77704	4.88038	-0.364118	0.71577	NA
Dmel_CG42730	0.427662	-1.77704	4.88038	-0.364118	0.71577	NA
Dmel_CG42731	0.427662	-1.77704	4.88038	-0.364118	0.71577	NA
Dmel_CG42752	0.427662	-1.77704	4.88038	-0.364118	0.71577	NA
Dmel_CG42846	0.427662	-1.77704	4.88038	-0.364118	0.71577	NA
Dmel_CG43349	0.427662	-1.77704	4.88038	-0.364118	0.71577	NA
Dmel_CG4371	0.427662	-1.77704	4.88038	-0.364118	0.71577	NA
Dmel_CG43813	0.427662	-1.77704	4.88038	-0.364118	0.71577	NA
Dmel_CG44044	0.427662	-1.77704	4.88038	-0.364118	0.71577	NA
Dmel_CG45045	0.427662	-1.77704	4.88038	-0.364118	0.71577	NA
Dmel_CG45764	0.427662	-1.77704	4.88038	-0.364118	0.71577	NA
Dmel_CG4779	0.427662	-1.77704	4.88038	-0.364118	0.71577	NA
Dmel_CG4922	0.427662	-1.77704	4.88038	-0.364118	0.71577	NA
Dmel_CG5549	0.427662	-1.77704	4.88038	-0.364118	0.71577	NA
Dmel_CG6499	0.427662	-1.77704	4.88038	-0.364118	0.71577	NA
Dmel_CG7432	0.427662	-1.77704	4.88038	-0.364118	0.71577	NA
Dmel_CG8422	0.427662	-1.77704	4.88038	-0.364118	0.71577	NA
Dmel_CG9363	0.427662	-1.77704	4.88038	-0.364118	0.71577	NA
Dmel_CG9642	0.427662	-1.77704	4.88038	-0.364118	0.71577	NA
Dmel_CG9863	0.427662	-1.77704	4.88038	-0.364118	0.71577	NA
Dmel_CG32196	30.3454	-1.7751	0.693877	-2.55824	0.0105204	0.0450124
Dmel_CG42694	111.459	-1.77434	0.442601	-4.00889	6.10037e-05	0.000722549
Dmel_CG31673	339.155	-1.7735	0.292305	-6.06729	1.30083e-09	4.90606e-08
Dmel_CG44198	4.53049	-1.77334	1.75936	-1.00795	0.31348	NA
Dmel_CG33649	89.9004	-1.77224	0.440887	-4.01972	5.82683e-05	0.000696869
Dmel_CG33650	89.9004	-1.77224	0.440887	-4.01972	5.82683e-05	0.000696869
Dmel_CG15544	2.91039	-1.77188	2.13731	-0.829023	0.407091	NA
Dmel_CG10804	4.5375	-1.77156	1.66566	-1.06358	0.28752	NA
Dmel_CG6345	86.1032	-1.77028	0.433506	-4.08363	4.43371e-05	0.000550946
Dmel_CG5535	963.908	-1.77	0.212274	-8.33827	7.53833e-17	9.67494e-15
Dmel_CG14309	1181.32	-1.7689	0.275624	-6.41782	1.3824e-10	6.12745e-09
Dmel_CG7122	70.6936	-1.76825	0.50845	-3.47773	0.000505672	0.00424222
Dmel_CG6919	0.430106	-1.76771	4.89227	-0.361327	0.717855	NA
Dmel_CG33267	2.93645	-1.76452	2.048	-0.861581	0.388918	NA
Dmel_CG9427	10.4178	-1.76401	1.25277	-1.40809	0.159105	0.31778
Dmel_CG6508	104.545	-1.7616	0.510596	-3.45008	0.000560424	0.00459398
Dmel_CG15828	10.2565	-1.76048	1.12386	-1.56646	0.11724	0.257772
Dmel_CG9331	98.5343	-1.7577	0.418718	-4.19781	2.69513e-05	0.000357646
Dmel_CG10031	1.45519	-1.75674	2.92334	-0.600937	0.547882	NA
Dmel_CG30283	1.45519	-1.75674	2.92334	-0.600937	0.547882	NA
Dmel_CG30398	1.45519	-1.75674	2.92334	-0.600937	0.547882	NA
Dmel_CG5920	22712.4	-1.75575	0.220211	-7.97303	1.54826e-15	1.53028e-13
Dmel_CG3597	4.31415	-1.75249	1.79088	-0.978564	0.327795	NA
Dmel_CG10129	773.236	-1.75032	0.224783	-7.78672	6.87726e-15	6.29123e-13
Dmel_CG9510	56.607	-1.74677	0.529768	-3.29723	0.000976447	0.00706773
Dmel_CG2641	51.2724	-1.74632	0.532795	-3.27765	0.00104674	0.00742036
Dmel_CG13279	17.2492	-1.74223	0.927947	-1.87751	0.0604485	0.162044
Dmel_CG10469	14.6518	-1.74009	0.959937	-1.81271	0.0698762	0.1799
Dmel_CG32626	1015.34	-1.73812	0.2251	-7.72157	1.14906e-14	1.00824e-12
Dmel_CG42562	1.47318	-1.73148	2.91091	-0.594825	0.551961	NA
Dmel_CG33970	60.8738	-1.72919	0.502936	-3.4382	0.000585603	0.00474609
Dmel_CG33960	22.2045	-1.72856	0.771726	-2.23986	0.0251	0.086273
Dmel_CG31926	153.762	-1.72463	1.00583	-1.71463	0.0864132	0.208266
Dmel_CG15106	694.013	-1.72108	0.240958	-7.14266	9.15412e-13	6.00887e-11
Dmel_CG31272	7.09627	-1.72043	1.37978	-1.24689	0.212438	0.384052
Dmel_CG4210	67.5188	-1.71854	0.483848	-3.55182	0.000382584	0.00335698
Dmel_CG8395	318.552	-1.71804	0.31196	-5.50723	3.64518e-08	1.06979e-06
Dmel_CG9778	2.87693	-1.71796	2.04054	-0.841912	0.399837	NA
Dmel_CG43980	1.47013	-1.71772	2.91215	-0.589847	0.555294	NA
Dmel_CG30030	7.15762	-1.71652	1.32481	-1.29567	0.19509	0.362642
Dmel_CG31216	86.2417	-1.71599	0.42297	-4.057	4.97078e-05	0.000606294
Dmel_CG34367	1.59712	-1.71566	2.83091	-0.606044	0.544485	NA
Dmel_CG1673	184.75	-1.71546	0.354647	-4.83707	1.31766e-06	2.56347e-05
Dmel_CG8922	7549.56	-1.71447	0.238424	-7.19084	6.43936e-13	4.39461e-11
Dmel_CG9761	404.596	-1.7142	0.272685	-6.28638	3.2496e-10	1.39021e-08
Dmel_CG34002	7.0882	-1.7139	1.36093	-1.25936	0.207901	0.378598
Dmel_CG42772	10.0542	-1.71279	1.23462	-1.3873	0.165349	0.326408
Dmel_CG31332	785.664	-1.71085	0.292486	-5.84934	4.93528e-09	1.71123e-07
Dmel_CG1909	18.7353	-1.70849	0.838812	-2.03679	0.0416706	0.124266
Dmel_CG11200	296.377	-1.70717	0.296107	-5.76538	8.14744e-09	2.67404e-07
Dmel_CG8249	2.89149	-1.70567	2.09005	-0.81609	0.414449	NA
Dmel_CG1082	8.60542	-1.7052	1.23476	-1.38099	0.167281	0.328414
Dmel_CG10407	568.903	-1.70403	0.301394	-5.65383	1.56909e-08	4.96051e-07
Dmel_CG6724	477.455	-1.69859	0.275469	-6.16617	6.99654e-10	2.73469e-08
Dmel_CG16995	1.40375	-1.69644	2.96444	-0.572261	0.567145	NA
Dmel_CG34291	1.40375	-1.69644	2.96444	-0.572261	0.567145	NA
Dmel_CG3649	1.40375	-1.69644	2.96444	-0.572261	0.567145	NA
Dmel_CG44102	1.40375	-1.69644	2.96444	-0.572261	0.567145	NA
Dmel_CG31628	1559.17	-1.69605	0.244621	-6.93336	4.10972e-12	2.3878e-10
Dmel_CG6607	268.589	-1.69477	0.308768	-5.48881	4.04661e-08	1.17955e-06
Dmel_CG18508	152.639	-1.69345	0.342917	-4.93836	7.87829e-07	1.64431e-05
Dmel_CG18530	7.25495	-1.69261	1.44748	-1.16935	0.242262	0.418186
Dmel_CG4398	43.9654	-1.6921	0.61431	-2.75447	0.00587879	0.0289695
Dmel_CG18331	11.4501	-1.69202	1.08925	-1.55339	0.120331	0.26242
Dmel_CG31274	116.494	-1.69019	2.90664	-0.581492	0.560909	0.710765
Dmel_CG18375	119.382	-1.68486	0.428115	-3.93553	8.30145e-05	0.000941743
Dmel_CG13848	145.725	-1.68424	0.364988	-4.61449	3.94057e-06	6.81496e-05
Dmel_CG6023	80.6885	-1.68289	0.436768	-3.85305	0.000116657	0.00125549
Dmel_CG11438	7.78822	-1.67912	1.2529	-1.34019	0.180183	0.345539
Dmel_CG4918	13882.5	-1.67909	0.240414	-6.98414	2.86609e-12	1.7356e-10
Dmel_CG1124	14.0327	-1.67754	0.99066	-1.69336	0.0903871	0.214707
Dmel_CG15445	647.241	-1.67685	0.231633	-7.23923	4.51229e-13	3.23343e-11
Dmel_CG43707	2.99496	-1.67094	1.96405	-0.850764	0.394901	NA
Dmel_CG8952	1.42174	-1.67079	2.95136	-0.566108	0.57132	NA
Dmel_CG42517	90.223	-1.67013	0.429832	-3.88554	0.000102103	0.00112418
Dmel_CG11271	10530.2	-1.6694	0.258795	-6.45068	1.11351e-10	5.12034e-09
Dmel_CG6890	210.454	-1.66908	0.367283	-4.5444	5.50925e-06	9.18777e-05
Dmel_CG11997	1.39568	-1.66582	3.27395	-0.508811	0.610885	NA
Dmel_CG9456	61.7463	-1.66326	0.530736	-3.13386	0.00172521	0.0110792
Dmel_CG18594	2.748	-1.66295	2.18647	-0.760564	0.446918	NA
Dmel_CG1750	32.152	-1.66268	0.673069	-2.4703	0.0135001	0.0542211
Dmel_CG15627	1.31633	-1.66138	3.05929	-0.543061	0.587088	NA
Dmel_CG4486	8.36553	-1.66075	1.22497	-1.35575	0.175178	0.338734
Dmel_CG3835	274.183	-1.6596	0.281061	-5.90477	3.53131e-09	1.2445e-07
Dmel_CG2977	90.6408	-1.65777	0.458858	-3.61282	0.000302885	0.00278855
Dmel_CG31720	12.4261	-1.65752	1.03695	-1.59846	0.109941	0.24581
Dmel_CG32302	2.77405	-1.65654	2.08341	-0.795109	0.42655	NA
Dmel_CG34316	5.54811	-1.65606	1.50872	-1.09766	0.272352	NA
Dmel_CG4043	207.374	-1.65581	0.365276	-4.53305	5.81391e-06	9.59573e-05
Dmel_CG3931	658.783	-1.65427	0.267246	-6.19007	6.01364e-10	2.38301e-08
Dmel_CG11387	202.59	-1.65406	0.318583	-5.19192	2.08133e-07	5.0415e-06
Dmel_CG15009	538.93	-1.6537	0.310533	-5.32534	1.00763e-07	2.65396e-06
Dmel_CG5618	57.9667	-1.65174	0.588273	-2.80778	0.00498849	0.0253373
Dmel_CG12194	60.1567	-1.65029	0.499324	-3.30505	0.00094959	0.00692626
Dmel_CG15324	89.534	-1.65013	0.458817	-3.5965	0.000322527	0.00292863
Dmel_CG15027	131.664	-1.64814	0.384169	-4.29014	1.78559e-05	0.00025379
Dmel_CG13358	4.05694	-1.64803	1.88143	-0.875948	0.381058	NA
Dmel_CG11312	227.107	-1.64728	0.295372	-5.57697	2.4474e-08	7.46284e-07
Dmel_CG4716	24.2872	-1.64666	0.766557	-2.14813	0.0317037	0.102373
Dmel_CG12026	250.657	-1.64645	0.317541	-5.18501	2.16006e-07	5.20291e-06
Dmel_CG2397	180.764	-1.64613	0.331443	-4.96655	6.81541e-07	1.45424e-05
Dmel_CG3814	1.34834	-1.64594	3.29714	-0.499204	0.617636	NA
Dmel_CG8624	57.9241	-1.6459	0.526896	-3.12376	0.00178554	0.011407
Dmel_CG13384	732.779	-1.64529	0.228443	-7.20217	5.92609e-13	4.14296e-11
Dmel_CG3989	1420.34	-1.64281	0.234832	-6.99568	2.6397e-12	1.62134e-10
Dmel_CG2863	434.863	-1.64243	0.262359	-6.26025	3.84356e-10	1.58137e-08
Dmel_CG14961	28.8188	-1.64106	0.703512	-2.33267	0.0196653	0.0720503
Dmel_CG7422	1.45616	-1.63899	2.95578	-0.554503	0.579235	NA
Dmel_CG17124	108.697	-1.63653	0.42846	-3.81957	0.000133683	0.00140875
Dmel_CG9046	6807.02	-1.6345	0.212907	-7.67709	1.62749e-14	1.39948e-12
Dmel_CG2981	1.35231	-1.63335	3.03902	-0.53746	0.59095	NA
Dmel_CG32792	1.35231	-1.63335	3.03902	-0.53746	0.59095	NA
Dmel_CG33344	1.35231	-1.63335	3.03902	-0.53746	0.59095	NA
Dmel_CG34214	1.35231	-1.63335	3.03902	-0.53746	0.59095	NA
Dmel_CG15618	236.379	-1.63127	0.29977	-5.44175	5.27604e-08	1.47781e-06
Dmel_CG3829	16.1237	-1.63106	0.901955	-1.80836	0.07055	0.181038
Dmel_CG6253	12026.8	-1.63033	0.248266	-6.56688	5.13797e-11	2.62985e-09
Dmel_CG14292	31.1849	-1.61905	0.721404	-2.2443	0.0248132	0.0855526
Dmel_CG9271	5513.6	-1.61828	0.231923	-6.97768	3.00092e-12	1.80454e-10
Dmel_CG17672	24.7148	-1.61793	0.750584	-2.15557	0.0311175	0.100897
Dmel_CG13247	0.380009	-1.61778	4.89227	-0.330681	0.740885	NA
Dmel_CG31522	296.221	-1.61302	0.315364	-5.11477	3.1412e-07	7.16476e-06
Dmel_CG42338	287.353	-1.61227	0.302094	-5.33697	9.45104e-08	2.5239e-06
Dmel_CG15473	9.49594	-1.61207	1.14872	-1.40336	0.160509	0.319314
Dmel_CG8010	943.64	-1.61171	0.227108	-7.09667	1.27802e-12	8.20128e-11
Dmel_CG1072	0.37695	-1.60819	4.89227	-0.328721	0.742367	NA
Dmel_CG13969	215.379	-1.60724	0.305605	-5.25921	1.44676e-07	3.67056e-06
Dmel_CG3039	362.151	-1.60662	0.256501	-6.26358	3.76229e-10	1.56594e-08
Dmel_CG3011	2073.48	-1.60631	0.24477	-6.56251	5.29083e-11	2.69206e-09
Dmel_CG9451	2.71454	-1.60597	2.08199	-0.771363	0.440492	NA
Dmel_CG10244	0.376222	-1.6059	4.89227	-0.328253	0.74272	NA
Dmel_CG11020	0.376222	-1.6059	4.89227	-0.328253	0.74272	NA
Dmel_CG12911	0.376222	-1.6059	4.89227	-0.328253	0.74272	NA
Dmel_CG13226	0.376222	-1.6059	4.89227	-0.328253	0.74272	NA
Dmel_CG13423	0.376222	-1.6059	4.89227	-0.328253	0.74272	NA
Dmel_CG13458	0.376222	-1.6059	4.89227	-0.328253	0.74272	NA
Dmel_CG13692	0.376222	-1.6059	4.89227	-0.328253	0.74272	NA
Dmel_CG13837	0.376222	-1.6059	4.89227	-0.328253	0.74272	NA
Dmel_CG13976	0.376222	-1.6059	4.89227	-0.328253	0.74272	NA
Dmel_CG14017	0.376222	-1.6059	4.89227	-0.328253	0.74272	NA
Dmel_CG14534	0.376222	-1.6059	4.89227	-0.328253	0.74272	NA
Dmel_CG14573	0.376222	-1.6059	4.89227	-0.328253	0.74272	NA
Dmel_CG14925	0.376222	-1.6059	4.89227	-0.328253	0.74272	NA
Dmel_CG15043	0.376222	-1.6059	4.89227	-0.328253	0.74272	NA
Dmel_CG15121	0.376222	-1.6059	4.89227	-0.328253	0.74272	NA
Dmel_CG15249	0.376222	-1.6059	4.89227	-0.328253	0.74272	NA
Dmel_CG15302	0.376222	-1.6059	4.89227	-0.328253	0.74272	NA
Dmel_CG15545	0.376222	-1.6059	4.89227	-0.328253	0.74272	NA
Dmel_CG15876	0.376222	-1.6059	4.89227	-0.328253	0.74272	NA
Dmel_CG16965	0.376222	-1.6059	4.89227	-0.328253	0.74272	NA
Dmel_CG17268	0.376222	-1.6059	4.89227	-0.328253	0.74272	NA
Dmel_CG30033	0.376222	-1.6059	4.89227	-0.328253	0.74272	NA
Dmel_CG31097	0.376222	-1.6059	4.89227	-0.328253	0.74272	NA
Dmel_CG31421	0.376222	-1.6059	4.89227	-0.328253	0.74272	NA
Dmel_CG33290	0.376222	-1.6059	4.89227	-0.328253	0.74272	NA
Dmel_CG33680	0.376222	-1.6059	4.89227	-0.328253	0.74272	NA
Dmel_CG3526	0.376222	-1.6059	4.89227	-0.328253	0.74272	NA
Dmel_CG3734	0.376222	-1.6059	4.89227	-0.328253	0.74272	NA
Dmel_CG42299	0.376222	-1.6059	4.89227	-0.328253	0.74272	NA
Dmel_CG42681	0.376222	-1.6059	4.89227	-0.328253	0.74272	NA
Dmel_CG42872	0.376222	-1.6059	4.89227	-0.328253	0.74272	NA
Dmel_CG43192	0.376222	-1.6059	4.89227	-0.328253	0.74272	NA
Dmel_CG43775	0.376222	-1.6059	4.89227	-0.328253	0.74272	NA
Dmel_CG4783	0.376222	-1.6059	4.89227	-0.328253	0.74272	NA
Dmel_CG5093	0.376222	-1.6059	4.89227	-0.328253	0.74272	NA
Dmel_CG5150	0.376222	-1.6059	4.89227	-0.328253	0.74272	NA
Dmel_CG5928	0.376222	-1.6059	4.89227	-0.328253	0.74272	NA
Dmel_CG6592	0.376222	-1.6059	4.89227	-0.328253	0.74272	NA
Dmel_CG7016	0.376222	-1.6059	4.89227	-0.328253	0.74272	NA
Dmel_CG7383	0.376222	-1.6059	4.89227	-0.328253	0.74272	NA
Dmel_CG8254	0.376222	-1.6059	4.89227	-0.328253	0.74272	NA
Dmel_CG8329	0.376222	-1.6059	4.89227	-0.328253	0.74272	NA
Dmel_CG8661	0.376222	-1.6059	4.89227	-0.328253	0.74272	NA
Dmel_CG12794	0.376222	-1.6059	4.89227	-0.328253	0.74272	NA
Dmel_CG13575	0.376222	-1.6059	4.89227	-0.328253	0.74272	NA
Dmel_CG14014	0.376222	-1.6059	4.89227	-0.328253	0.74272	NA
Dmel_CG14569	0.376222	-1.6059	4.89227	-0.328253	0.74272	NA
Dmel_CG16798	0.376222	-1.6059	4.89227	-0.328253	0.74272	NA
Dmel_CG17199	0.376222	-1.6059	4.89227	-0.328253	0.74272	NA
Dmel_CG18144	0.376222	-1.6059	4.89227	-0.328253	0.74272	NA
Dmel_CG30076	0.376222	-1.6059	4.89227	-0.328253	0.74272	NA
Dmel_CG31776	0.376222	-1.6059	4.89227	-0.328253	0.74272	NA
Dmel_CG32187	0.376222	-1.6059	4.89227	-0.328253	0.74272	NA
Dmel_CG3253	0.376222	-1.6059	4.89227	-0.328253	0.74272	NA
Dmel_CG32639	0.376222	-1.6059	4.89227	-0.328253	0.74272	NA
Dmel_CG3592	0.376222	-1.6059	4.89227	-0.328253	0.74272	NA
Dmel_CG42471	0.376222	-1.6059	4.89227	-0.328253	0.74272	NA
Dmel_CG42472	0.376222	-1.6059	4.89227	-0.328253	0.74272	NA
Dmel_CG43181	0.376222	-1.6059	4.89227	-0.328253	0.74272	NA
Dmel_CG6083	0.376222	-1.6059	4.89227	-0.328253	0.74272	NA
Dmel_CG6793	0.376222	-1.6059	4.89227	-0.328253	0.74272	NA
Dmel_CG8147	0.376222	-1.6059	4.89227	-0.328253	0.74272	NA
Dmel_CG9347	0.376222	-1.6059	4.89227	-0.328253	0.74272	NA
Dmel_CG17212	0.376222	-1.6059	4.89227	-0.328253	0.74272	NA
Dmel_CG11236	0.376222	-1.6059	4.89227	-0.328253	0.74272	NA
Dmel_CG10073	0.376222	-1.6059	4.89227	-0.328253	0.74272	NA
Dmel_CG15539	0.376222	-1.6059	4.89227	-0.328253	0.74272	NA
Dmel_CG15221	40.5156	-1.60575	0.634173	-2.53204	0.0113402	0.0476376
Dmel_CG8891	224.821	-1.60465	0.322774	-4.97144	6.64574e-07	1.42511e-05
Dmel_CG18853	46.6123	-1.60332	0.764559	-2.09705	0.0359888	0.11156
Dmel_CG11073	2.15199	-1.60325	2.41128	-0.664897	0.506116	NA
Dmel_CG2999	1171.18	-1.60208	0.219967	-7.28327	3.25824e-13	2.39467e-11
Dmel_CG8399	640.78	-1.60069	0.224284	-7.13687	9.54767e-13	6.21973e-11
Dmel_CG30021	200.943	-1.60019	0.343999	-4.65174	3.2915e-06	5.81648e-05
Dmel_CG8078	203.925	-1.59804	0.319341	-5.00418	5.61015e-07	1.22752e-05
Dmel_CG9972	1.34424	-1.5969	3.06074	-0.521737	0.601853	NA
Dmel_CG32364	30.0274	-1.59621	0.722031	-2.21072	0.0270554	0.0913425
Dmel_CG14593	0.373101	-1.59605	4.89227	-0.32624	0.744243	NA
Dmel_CG14688	456.041	-1.59463	0.255511	-6.24097	4.34878e-10	1.76392e-08
Dmel_CG31860	1.34295	-1.59382	3.06167	-0.520573	0.602664	NA
Dmel_CG5973	249.71	-1.58957	0.328789	-4.83461	1.33406e-06	2.58369e-05
Dmel_CG10763	180.656	-1.58895	0.352995	-4.50134	6.7526e-06	0.000108331
Dmel_CG4984	17.3904	-1.58656	0.873349	-1.81664	0.069273	0.178882
Dmel_CG11279	121.737	-1.58609	0.375307	-4.22613	2.37747e-05	0.000321444
Dmel_CG1712	8.08702	-1.58506	1.24606	-1.27206	0.203353	0.372763
Dmel_CG17907	186.789	-1.58417	0.32389	-4.89107	1.00288e-06	2.02911e-05
Dmel_CG31869	451.124	-1.58412	0.264711	-5.98432	2.17296e-09	7.95117e-08
Dmel_CG1077	377.266	-1.58356	0.964723	-1.64146	0.100702	0.231645
Dmel_CG1475	18115.1	-1.5815	0.224632	-7.04042	1.91658e-12	1.19425e-10
Dmel_CG4250	256.712	-1.58128	0.325882	-4.85232	1.22026e-06	2.40371e-05
Dmel_CG43444	28.1774	-1.57942	0.685209	-2.30503	0.0211651	0.0759278
Dmel_CG13012	7.99738	-1.57906	1.26413	-1.24913	0.211619	0.383178
Dmel_CG10685	189.413	-1.57859	0.363566	-4.34195	1.41221e-05	0.000207582
Dmel_CG1958	5.30015	-1.57566	1.53604	-1.02579	0.304989	NA
Dmel_CG31467	21.2776	-1.57453	0.824032	-1.91076	0.0560349	0.153651
Dmel_CG13891	1.36223	-1.57008	3.04683	-0.515315	0.606333	NA
Dmel_CG34167	1.36223	-1.57008	3.04683	-0.515315	0.606333	NA
Dmel_CG3556	3.66072	-1.56965	1.82263	-0.861204	0.389126	NA
Dmel_CG7978	77.195	-1.5672	0.438778	-3.57175	0.000354607	0.00315986
Dmel_CG43726	401.683	-1.56655	0.267519	-5.85585	4.74575e-09	1.65217e-07
Dmel_CG14032	2.72446	-1.56381	2.24876	-0.69541	0.486798	NA
Dmel_CG18330	26.6075	-1.56256	0.713266	-2.19071	0.0284728	0.0944276
Dmel_CG40263	662.182	-1.56047	0.222355	-7.01791	2.2521e-12	1.39322e-10
Dmel_CG17108	10.759	-1.56002	1.1804	-1.32161	0.186298	0.3523
Dmel_CG10623	567.858	-1.55961	0.263409	-5.92088	3.2022e-09	1.14256e-07
Dmel_CG3050	9.26597	-1.55828	1.17421	-1.32709	0.18448	0.350311
Dmel_CG10868	7374.75	-1.55827	0.179677	-8.6726	4.22367e-18	6.05322e-16
Dmel_CG13188	10.5235	-1.55752	1.09483	-1.42261	0.154849	0.312496
Dmel_CG43368	38.1607	-1.55536	0.606641	-2.56388	0.0103508	0.0445702
Dmel_CG13840	2.65503	-1.55345	2.12736	-0.730222	0.465254	NA
Dmel_CG16836	2.65503	-1.55345	2.12736	-0.730222	0.465254	NA
Dmel_CG30285	10.4107	-1.55124	1.13988	-1.36088	0.173553	0.336349
Dmel_CG6206	235.393	-1.55053	0.33742	-4.59524	4.32251e-06	7.36025e-05
Dmel_CG8050	173.885	-1.55019	0.387808	-3.9973	6.40694e-05	0.00075367
Dmel_CG6494	260.932	-1.54915	0.324848	-4.76885	1.85282e-06	3.45606e-05
Dmel_CG14946	26.7135	-1.5488	0.756825	-2.04644	0.0407127	0.122121
Dmel_CG43333	280.036	-1.54854	0.299578	-5.16909	2.35231e-07	5.63442e-06
Dmel_CG5278	5.29275	-1.54403	1.54176	-1.00147	0.3166	NA
Dmel_CG7144	13.0314	-1.54366	1.03642	-1.48942	0.136377	0.287429
Dmel_CG43085	1.42107	-1.54303	2.97527	-0.518617	0.604028	NA
Dmel_CG13895	157.165	-1.54265	0.33385	-4.62077	3.8232e-06	6.64156e-05
Dmel_CG13258	2.61166	-1.53974	2.12284	-0.72532	0.468255	NA
Dmel_CG33128	2.61166	-1.53974	2.12284	-0.72532	0.468255	NA
Dmel_CG43179	2.61166	-1.53974	2.12284	-0.72532	0.468255	NA
Dmel_CG1543	1.31886	-1.53543	3.31823	-0.462726	0.643561	NA
Dmel_CG11502	1.31886	-1.53543	3.31823	-0.462725	0.643561	NA
Dmel_CG4089	135.863	-1.53218	0.409428	-3.74224	0.000182388	0.0017924
Dmel_CG7512	30.8459	-1.53122	0.757615	-2.0211	0.0432695	0.128081
Dmel_CG30092	223.929	-1.53064	0.366235	-4.17939	2.92297e-05	0.000380827
Dmel_CG4630	15.5841	-1.53052	0.916707	-1.66959	0.0950011	0.222896
Dmel_CG10601	76.9739	-1.52934	0.437935	-3.49215	0.000479153	0.00405578
Dmel_CG11664	1.2928	-1.52884	3.06006	-0.499611	0.617349	NA
Dmel_CG15446	1.2928	-1.52884	3.06006	-0.499611	0.617349	NA
Dmel_CG10752	1.2928	-1.52884	3.06006	-0.499611	0.617349	NA
Dmel_CG9196	1.2928	-1.52884	3.06006	-0.499611	0.617349	NA
Dmel_CG17169	47.9259	-1.52593	0.560708	-2.72143	0.00649998	0.0312079
Dmel_CG6310	126.422	-1.52582	0.406594	-3.75269	0.000174944	0.00174387
Dmel_CG6749	9.29455	-1.52387	1.30493	-1.16778	0.242897	0.419071
Dmel_CG11086	97.6898	-1.5237	0.401612	-3.79397	0.000148257	0.00153045
Dmel_CG4087	15588.8	-1.52344	0.246758	-6.17385	6.66461e-10	2.61685e-08
Dmel_CG2706	48.1279	-1.52339	0.541748	-2.812	0.00492348	0.0250515
Dmel_CG17159	47.5718	-1.52254	0.583412	-2.60971	0.00906187	0.0402911
Dmel_CG31911	664.611	-1.52078	0.235319	-6.46263	1.02899e-10	4.75716e-09
Dmel_CG6533	2505.56	-1.51965	0.926488	-1.64023	0.100957	0.231749
Dmel_CG5194	455.871	-1.51929	0.242221	-6.27234	3.55665e-10	1.50659e-08
Dmel_CG43886	7.80154	-1.51905	1.29303	-1.17479	0.240077	0.416803
Dmel_CG18171	51.5378	-1.51757	0.571043	-2.65755	0.00787113	0.0362527
Dmel_CG3195	13872.3	-1.5146	0.241772	-6.26458	3.7382e-10	1.56594e-08
Dmel_CG30485	5.13776	-1.51458	1.55643	-0.973114	0.330497	NA
Dmel_CG30056	2.62965	-1.51406	2.22903	-0.679245	0.496983	NA
Dmel_CG30269	30.5533	-1.51007	0.723433	-2.08736	0.0368553	0.113428
Dmel_CG5271	19116.6	-1.5099	0.226905	-6.6543	2.84658e-11	1.52036e-09
Dmel_CG9270	2.53417	-1.50984	2.25031	-0.670948	0.502254	NA
Dmel_CG5164	590.975	-1.50755	0.26188	-5.75663	8.58115e-09	2.80568e-07
Dmel_CG7026	3.94044	-1.50729	1.85613	-0.812059	0.416758	NA
Dmel_CG32154	9.06089	-1.50547	1.20975	-1.24444	0.213337	0.38467
Dmel_CG15120	2.56022	-1.5052	2.16041	-0.696721	0.485978	NA
Dmel_CG40498	4.62574	-1.50498	1.72257	-0.873684	0.38229	NA
Dmel_CG17725	47.5874	-1.50469	0.549364	-2.73896	0.00616339	0.0299502
Dmel_CG45087	47.5874	-1.50469	0.549364	-2.73896	0.00616339	0.0299502
Dmel_CG13924	6.54448	-1.50392	1.40694	-1.06893	0.2851	0.465812
Dmel_CG7399	8.08509	-1.50274	1.28196	-1.17222	0.241108	0.417573
Dmel_CG9441	14.4462	-1.50116	0.946754	-1.58558	0.112834	0.250195
Dmel_CG3622	221.057	-1.50095	0.31956	-4.69691	2.64125e-06	4.77804e-05
Dmel_CG18243	25.5953	-1.50046	0.723491	-2.07392	0.0380867	0.116138
Dmel_CG30357	11.4823	-1.50032	1.09157	-1.37446	0.169299	0.330788
Dmel_CG43739	43.5144	-1.5003	3.32802	-0.45081	0.652127	0.780139
Dmel_CG11275	32.0526	-1.49982	0.667205	-2.24792	0.0245812	0.0849233
Dmel_CG7334	1238.34	-1.49966	0.216609	-6.92336	4.41046e-12	2.54534e-10
Dmel_CG3395	15522.1	-1.49756	0.231212	-6.47701	9.3556e-11	4.39611e-09
Dmel_CG3706	2.4908	-1.49344	2.34992	-0.635528	0.525084	NA
Dmel_CG8857	14793.6	-1.49125	0.244558	-6.09772	1.07594e-09	4.14889e-08
Dmel_CG14071	1.61942	-1.49115	2.79545	-0.533421	0.593742	NA
Dmel_CG17052	1.09225	-1.49092	3.55132	-0.419821	0.674616	NA
Dmel_CG17420	14767.4	-1.48942	0.242015	-6.15425	7.54325e-10	2.93504e-08
Dmel_CG11420	605.361	-1.48885	0.229379	-6.49078	8.53947e-11	4.10229e-09
Dmel_CG18249	11.6149	-1.48691	1.07472	-1.38353	0.166503	0.327483
Dmel_CG17732	26.9186	-1.48509	0.720717	-2.06057	0.0393441	0.118625
Dmel_CG7808	23782.6	-1.48455	0.238608	-6.22173	4.91717e-10	1.98511e-08
Dmel_CG31142	211.484	-1.48439	0.325397	-4.56177	5.07231e-06	8.55232e-05
Dmel_CG2914	10.3547	-1.48327	1.08445	-1.36777	0.171386	0.333541
Dmel_CG3340	1.09868	-1.48081	3.2371	-0.457451	0.647347	NA
Dmel_CG2227	493.152	-1.4798	0.254848	-5.80657	6.37641e-09	2.15869e-07
Dmel_CG1056	3.9616	-1.47056	1.76475	-0.833301	0.404675	NA
Dmel_CG4170	900.347	-1.46917	0.2269	-6.47496	9.48353e-11	4.432e-09
Dmel_CG10185	5.02681	-1.46913	1.58213	-0.928578	0.353108	NA
Dmel_CG6517	4101.25	-1.46895	0.974844	-1.50686	0.131846	0.281187
Dmel_CG32032	5.05287	-1.46683	1.53733	-0.954142	0.340012	NA
Dmel_CG4404	1470.53	-1.46605	0.205858	-7.12167	1.06629e-12	6.89401e-11
Dmel_CG14210	442.614	-1.4656	0.266559	-5.4982	3.83677e-08	1.12219e-06
Dmel_CG16778	58.475	-1.46432	0.5109	-2.86616	0.00415485	0.0220058
Dmel_CG3775	2.52315	-1.46414	2.13867	-0.684602	0.493595	NA
Dmel_CG12908	3.71602	-1.46175	1.91563	-0.763068	0.445423	NA
Dmel_CG2904	58.7586	-1.46145	0.500338	-2.92094	0.00348979	0.0194106
Dmel_CG2233	45.2283	-1.46076	0.60382	-2.4192	0.0155545	0.0602764
Dmel_CG1869	1.24136	-1.45821	3.09789	-0.470711	0.637847	NA
Dmel_CG30016	1.24136	-1.45821	3.09789	-0.470711	0.637847	NA
Dmel_CG31501	1.24136	-1.45821	3.09789	-0.470711	0.637847	NA
Dmel_CG9637	1.24136	-1.45821	3.09789	-0.470711	0.637847	NA
Dmel_CG3672	10.2453	-1.45682	1.2704	-1.14674	0.251488	0.427804
Dmel_CG41265	48.9471	-1.45616	0.530138	-2.74676	0.00601875	0.029441
Dmel_CG11983	15.9355	-1.45518	0.89751	-1.62135	0.104943	0.238227
Dmel_CG11941	5.07085	-1.4546	1.55768	-0.933824	0.350395	NA
Dmel_CG9097	29.0971	-1.4538	0.707517	-2.05479	0.0398991	0.119921
Dmel_CG13870	1.29874	-1.45318	3.05226	-0.476099	0.634004	NA
Dmel_CG32369	116.621	-1.45275	0.38693	-3.75455	0.000173655	0.00173601
Dmel_CG10189	102.271	-1.45262	0.444143	-3.27062	0.00107312	0.00757617
Dmel_CG5059	380.825	-1.45108	0.267717	-5.42017	5.9541e-08	1.65694e-06
Dmel_CG10137	30.1121	-1.45056	0.674164	-2.15165	0.031425	0.101664
Dmel_CG5646	22.4804	-1.4493	0.756621	-1.91549	0.0554295	0.152671
Dmel_CG2767	428.754	-1.44812	0.243876	-5.93794	2.88618e-09	1.04278e-07
Dmel_CG12643	8.70013	-1.44775	1.20455	-1.2019	0.229401	0.404568
Dmel_CG9650	30.5993	-1.44706	0.684373	-2.11444	0.0344781	0.108542
Dmel_CG15739	12.793	-1.44647	0.994085	-1.45507	0.145649	0.301356
Dmel_CG15890	30.2776	-1.44484	0.709366	-2.0368	0.0416701	0.124266
Dmel_CG11048	3.734	-1.4428	1.8009	-0.801155	0.423042	NA
Dmel_CG6388	347.424	-1.4427	0.276838	-5.21137	1.87453e-07	4.60545e-06
Dmel_CG17707	2.52678	-1.44164	2.33661	-0.616982	0.537246	NA
Dmel_CG2175	9329.36	-1.44005	0.200435	-7.18462	6.73961e-13	4.52765e-11
Dmel_CG33105	317.729	-1.43987	0.395145	-3.64389	0.00026855	0.00251828
Dmel_CG9632	3.56597	-1.43887	1.81319	-0.79356	0.427451	NA
Dmel_CG9148	557.404	-1.4372	0.267866	-5.36536	8.07886e-08	2.17094e-06
Dmel_CG31119	35.4355	-1.43284	0.616835	-2.3229	0.0201845	0.0733357
Dmel_CG17110	3.69064	-1.43275	1.79331	-0.798941	0.424324	NA
Dmel_CG15173	106.094	-1.43249	0.420992	-3.40267	0.000667318	0.00526447
Dmel_CG32885	2202.99	-1.43224	0.205036	-6.9853	2.84254e-12	1.73354e-10
Dmel_CG12063	1.25935	-1.43121	3.08231	-0.464329	0.642412	NA
Dmel_CG12242	1.25935	-1.43121	3.08231	-0.464329	0.642412	NA
Dmel_CG31275	1.25935	-1.43121	3.08231	-0.464329	0.642412	NA
Dmel_CG31769	1.25935	-1.43121	3.08231	-0.464329	0.642412	NA
Dmel_CG32712	1.25935	-1.43121	3.08231	-0.464329	0.642412	NA
Dmel_CG42561	1.25935	-1.43121	3.08231	-0.464329	0.642412	NA
Dmel_CG6821	1.25935	-1.43121	3.08231	-0.464329	0.642412	NA
Dmel_CG9624	1.25935	-1.43121	3.08231	-0.464329	0.642412	NA
Dmel_CG6612	325.488	-1.42988	0.285214	-5.01334	5.34928e-07	1.17343e-05
Dmel_CG3234	582.364	-1.42973	0.228456	-6.25822	3.89392e-10	1.59447e-08
Dmel_CG34349	253.224	-1.42711	0.316701	-4.50617	6.60093e-06	0.000106295
Dmel_CG4863	24869.1	-1.42534	0.213461	-6.67727	2.43435e-11	1.30831e-09
Dmel_CG17029	88.3503	-1.41997	0.432881	-3.28029	0.001037	0.00736954
Dmel_CG33868	59.5062	-1.41958	0.562501	-2.5237	0.0116128	0.048593
Dmel_CG14142	3.58697	-1.41939	1.9904	-0.713121	0.475771	NA
Dmel_CG14777	46.2574	-1.41931	0.569651	-2.49153	0.0127193	0.0518111
Dmel_CG7123	1437.6	-1.41877	0.23064	-6.15146	7.67733e-10	2.97376e-08
Dmel_CG34242	62.7971	-1.41649	0.484107	-2.92599	0.00343364	0.0192101
Dmel_CG10035	0.324782	-1.41634	4.90716	-0.288627	0.772867	NA
Dmel_CG10104	0.324782	-1.41634	4.90716	-0.288627	0.772867	NA
Dmel_CG10794	0.324782	-1.41634	4.90716	-0.288627	0.772867	NA
Dmel_CG11368	0.324782	-1.41634	4.90716	-0.288627	0.772867	NA
Dmel_CG1171	0.324782	-1.41634	4.90716	-0.288627	0.772867	NA
Dmel_CG12255	0.324782	-1.41634	4.90716	-0.288627	0.772867	NA
Dmel_CG12826	0.324782	-1.41634	4.90716	-0.288627	0.772867	NA
Dmel_CG13028	0.324782	-1.41634	4.90716	-0.288627	0.772867	NA
Dmel_CG13232	0.324782	-1.41634	4.90716	-0.288627	0.772867	NA
Dmel_CG13493	0.324782	-1.41634	4.90716	-0.288627	0.772867	NA
Dmel_CG13578	0.324782	-1.41634	4.90716	-0.288627	0.772867	NA
Dmel_CG13701	0.324782	-1.41634	4.90716	-0.288627	0.772867	NA
Dmel_CG13705	0.324782	-1.41634	4.90716	-0.288627	0.772867	NA
Dmel_CG13857	0.324782	-1.41634	4.90716	-0.288627	0.772867	NA
Dmel_CG13999	0.324782	-1.41634	4.90716	-0.288627	0.772867	NA
Dmel_CG14052	0.324782	-1.41634	4.90716	-0.288627	0.772867	NA
Dmel_CG14205	0.324782	-1.41634	4.90716	-0.288627	0.772867	NA
Dmel_CG14280	0.324782	-1.41634	4.90716	-0.288627	0.772867	NA
Dmel_CG14370	0.324782	-1.41634	4.90716	-0.288627	0.772867	NA
Dmel_CG1438	0.324782	-1.41634	4.90716	-0.288627	0.772867	NA
Dmel_CG14627	0.324782	-1.41634	4.90716	-0.288627	0.772867	NA
Dmel_CG14640	0.324782	-1.41634	4.90716	-0.288627	0.772867	NA
Dmel_CG14829	0.324782	-1.41634	4.90716	-0.288627	0.772867	NA
Dmel_CG15008	0.324782	-1.41634	4.90716	-0.288627	0.772867	NA
Dmel_CG15013	0.324782	-1.41634	4.90716	-0.288627	0.772867	NA
Dmel_CG15552	0.324782	-1.41634	4.90716	-0.288627	0.772867	NA
Dmel_CG15563	0.324782	-1.41634	4.90716	-0.288627	0.772867	NA
Dmel_CG16738	0.324782	-1.41634	4.90716	-0.288627	0.772867	NA
Dmel_CG16869	0.324782	-1.41634	4.90716	-0.288627	0.772867	NA
Dmel_CG1688	0.324782	-1.41634	4.90716	-0.288627	0.772867	NA
Dmel_CG17147	0.324782	-1.41634	4.90716	-0.288627	0.772867	NA
Dmel_CG17885	0.324782	-1.41634	4.90716	-0.288627	0.772867	NA
Dmel_CG18108	0.324782	-1.41634	4.90716	-0.288627	0.772867	NA
Dmel_CG18294	0.324782	-1.41634	4.90716	-0.288627	0.772867	NA
Dmel_CG18301	0.324782	-1.41634	4.90716	-0.288627	0.772867	NA
Dmel_CG2040	0.324782	-1.41634	4.90716	-0.288627	0.772867	NA
Dmel_CG2555	0.324782	-1.41634	4.90716	-0.288627	0.772867	NA
Dmel_CG30450	0.324782	-1.41634	4.90716	-0.288627	0.772867	NA
Dmel_CG31221	0.324782	-1.41634	4.90716	-0.288627	0.772867	NA
Dmel_CG3162	0.324782	-1.41634	4.90716	-0.288627	0.772867	NA
Dmel_CG31703	0.324782	-1.41634	4.90716	-0.288627	0.772867	NA
Dmel_CG31976	0.324782	-1.41634	4.90716	-0.288627	0.772867	NA
Dmel_CG32006	0.324782	-1.41634	4.90716	-0.288627	0.772867	NA
Dmel_CG32447	0.324782	-1.41634	4.90716	-0.288627	0.772867	NA
Dmel_CG32499	0.324782	-1.41634	4.90716	-0.288627	0.772867	NA
Dmel_CG32678	0.324782	-1.41634	4.90716	-0.288627	0.772867	NA
Dmel_CG32797	0.324782	-1.41634	4.90716	-0.288627	0.772867	NA
Dmel_CG33270	0.324782	-1.41634	4.90716	-0.288627	0.772867	NA
Dmel_CG33325	0.324782	-1.41634	4.90716	-0.288627	0.772867	NA
Dmel_CG33351	0.324782	-1.41634	4.90716	-0.288627	0.772867	NA
Dmel_CG3347	0.324782	-1.41634	4.90716	-0.288627	0.772867	NA
Dmel_CG33476	0.324782	-1.41634	4.90716	-0.288627	0.772867	NA
Dmel_CG33658	0.324782	-1.41634	4.90716	-0.288627	0.772867	NA
Dmel_CG33700	0.324782	-1.41634	4.90716	-0.288627	0.772867	NA
Dmel_CG33927	0.324782	-1.41634	4.90716	-0.288627	0.772867	NA
Dmel_CG33980	0.324782	-1.41634	4.90716	-0.288627	0.772867	NA
Dmel_CG34113	0.324782	-1.41634	4.90716	-0.288627	0.772867	NA
Dmel_CG34203	0.324782	-1.41634	4.90716	-0.288627	0.772867	NA
Dmel_CG34244	0.324782	-1.41634	4.90716	-0.288627	0.772867	NA
Dmel_CG34390	0.324782	-1.41634	4.90716	-0.288627	0.772867	NA
Dmel_CG34458	0.324782	-1.41634	4.90716	-0.288627	0.772867	NA
Dmel_CG42295	0.324782	-1.41634	4.90716	-0.288627	0.772867	NA
Dmel_CG42484	0.324782	-1.41634	4.90716	-0.288627	0.772867	NA
Dmel_CG42634	0.324782	-1.41634	4.90716	-0.288627	0.772867	NA
Dmel_CG42635	0.324782	-1.41634	4.90716	-0.288627	0.772867	NA
Dmel_CG42728	0.324782	-1.41634	4.90716	-0.288627	0.772867	NA
Dmel_CG43072	0.324782	-1.41634	4.90716	-0.288627	0.772867	NA
Dmel_CG43171	0.324782	-1.41634	4.90716	-0.288627	0.772867	NA
Dmel_CG43178	0.324782	-1.41634	4.90716	-0.288627	0.772867	NA
Dmel_CG43267	0.324782	-1.41634	4.90716	-0.288627	0.772867	NA
Dmel_CG46514	0.324782	-1.41634	4.90716	-0.288627	0.772867	NA
Dmel_CG46515	0.324782	-1.41634	4.90716	-0.288627	0.772867	NA
Dmel_CG46516	0.324782	-1.41634	4.90716	-0.288627	0.772867	NA
Dmel_CG46518	0.324782	-1.41634	4.90716	-0.288627	0.772867	NA
Dmel_CG4830	0.324782	-1.41634	4.90716	-0.288627	0.772867	NA
Dmel_CG4846	0.324782	-1.41634	4.90716	-0.288627	0.772867	NA
Dmel_CG5334	0.324782	-1.41634	4.90716	-0.288627	0.772867	NA
Dmel_CG5528	0.324782	-1.41634	4.90716	-0.288627	0.772867	NA
Dmel_CG5812	0.324782	-1.41634	4.90716	-0.288627	0.772867	NA
Dmel_CG5945	0.324782	-1.41634	4.90716	-0.288627	0.772867	NA
Dmel_CG6298	0.324782	-1.41634	4.90716	-0.288627	0.772867	NA
Dmel_CG6485	0.324782	-1.41634	4.90716	-0.288627	0.772867	NA
Dmel_CG6642	0.324782	-1.41634	4.90716	-0.288627	0.772867	NA
Dmel_CG7079	0.324782	-1.41634	4.90716	-0.288627	0.772867	NA
Dmel_CG7166	0.324782	-1.41634	4.90716	-0.288627	0.772867	NA
Dmel_CG7330	0.324782	-1.41634	4.90716	-0.288627	0.772867	NA
Dmel_CG7348	0.324782	-1.41634	4.90716	-0.288627	0.772867	NA
Dmel_CG7409	0.324782	-1.41634	4.90716	-0.288627	0.772867	NA
Dmel_CG7953	0.324782	-1.41634	4.90716	-0.288627	0.772867	NA
Dmel_CG8160	0.324782	-1.41634	4.90716	-0.288627	0.772867	NA
Dmel_CG8175	0.324782	-1.41634	4.90716	-0.288627	0.772867	NA
Dmel_CG8216	0.324782	-1.41634	4.90716	-0.288627	0.772867	NA
Dmel_CG8910	0.324782	-1.41634	4.90716	-0.288627	0.772867	NA
Dmel_CG9481	0.324782	-1.41634	4.90716	-0.288627	0.772867	NA
Dmel_CG2812	120.006	-1.41626	0.388468	-3.64575	0.000266608	0.0025028
Dmel_CG42559	1.23681	-1.41596	3.10346	-0.456253	0.648208	NA
Dmel_CG11686	16.3882	-1.41558	0.892754	-1.58564	0.112822	0.250195
Dmel_CG41520	2.6176	-1.41517	2.22094	-0.637195	0.523998	NA
Dmel_CG45988	19.0433	-1.41481	1.03487	-1.36714	0.171582	0.333582
Dmel_CG10184	114.577	-1.41469	0.384594	-3.67841	0.000234695	0.00223493
Dmel_CG2986	6526.36	-1.41431	0.239136	-5.91426	3.3337e-09	1.18456e-07
Dmel_CG4484	53.3321	-1.41399	0.515231	-2.74439	0.00606242	0.0296029
Dmel_CG17134	4.87249	-1.41371	1.58032	-0.894571	0.371016	NA
Dmel_CG6764	2843.25	-1.41178	0.242564	-5.82024	5.87636e-09	2.01318e-07
Dmel_CG12116	15.7901	-1.40967	0.918041	-1.53552	0.124657	0.269464
Dmel_CG34010	13.4623	-1.40924	1.00181	-1.4067	0.159516	0.318254
Dmel_CG42278	26.3033	-1.40821	0.70897	-1.98628	0.0470028	0.135995
Dmel_CG9952	91.6527	-1.40747	0.405881	-3.4677	0.000524928	0.004357
Dmel_CG7434	12639.6	-1.40692	0.21889	-6.42753	1.29696e-10	5.81406e-09
Dmel_CG3413	197.675	-1.40467	0.33259	-4.22344	2.40605e-05	0.000323789
Dmel_CG8909	2.51063	-1.40329	2.30771	-0.608088	0.543129	NA
Dmel_CG32170	10.9095	-1.4031	1.07837	-1.30113	0.193214	0.360922
Dmel_CG7088	31.0172	-1.40255	0.720642	-1.94624	0.0516254	0.145169
Dmel_CG12355	13.2548	-1.39973	1.01778	-1.37528	0.169044	0.330596
Dmel_CG12693	2.37985	-1.39951	2.33289	-0.599902	0.548571	NA
Dmel_CG34433	2.37985	-1.39951	2.33289	-0.599902	0.548571	NA
Dmel_CG6846	12185.9	-1.3991	0.234137	-5.97555	2.29309e-09	8.35519e-08
Dmel_CG1374	63.4982	-1.39875	0.476992	-2.93244	0.00336312	0.018914
Dmel_CG12379	37.864	-1.39818	0.615547	-2.27145	0.02312	0.0810932
Dmel_CG14164	12.9839	-1.39571	0.978808	-1.42592	0.15389	0.311439
Dmel_CG3389	64.3285	-1.39019	0.46953	-2.96082	0.00306822	0.0175074
Dmel_CG10680	5.28544	-1.38996	1.53326	-0.906542	0.364649	NA
Dmel_CG42450	345.614	-1.38835	0.283428	-4.89843	9.66045e-07	1.9592e-05
Dmel_CG42732	398.815	-1.38725	0.25687	-5.40058	6.64259e-08	1.81332e-06
Dmel_CG40041	6.46123	-1.38689	1.38471	-1.00157	0.316551	0.500005
Dmel_CG6864	2.46726	-1.38652	2.27887	-0.608427	0.542904	NA
Dmel_CG2674	7074.99	-1.38573	0.192602	-7.1948	6.25519e-13	4.33777e-11
Dmel_CG18661	95.9843	-1.38573	0.418561	-3.3107	0.00093063	0.00682806
Dmel_CG40298	3.5617	-1.38567	1.92642	-0.719298	0.471957	NA
Dmel_CG16712	8.37467	-1.38543	1.26526	-1.09497	0.273528	0.45154
Dmel_CG11308	3.71854	-1.3849	1.9048	-0.72706	0.467189	NA
Dmel_CG12531	1.18992	-1.38406	3.17463	-0.435974	0.662856	NA
Dmel_CG13139	1.18992	-1.38405	3.17463	-0.435971	0.662858	NA
Dmel_CG11637	1.18992	-1.38405	3.17463	-0.435971	0.662858	NA
Dmel_CG13587	1.18992	-1.38405	3.17463	-0.435971	0.662858	NA
Dmel_CG31475	1.18992	-1.38405	3.17463	-0.435971	0.662858	NA
Dmel_CG42691	1.18992	-1.38405	3.17463	-0.435971	0.662858	NA
Dmel_CG7907	1.18992	-1.38405	3.17463	-0.435971	0.662858	NA
Dmel_CG12071	20.8256	-1.38341	0.790972	-1.749	0.0802911	0.198113
Dmel_CG33968	127.31	-1.38298	0.359464	-3.84734	0.000119406	0.00128347
Dmel_CG14285	13.1964	-1.38009	0.982964	-1.40401	0.160316	0.31911
Dmel_CG8417	380.526	-1.37939	0.285555	-4.83056	1.36148e-06	2.62048e-05
Dmel_CG32774	373.377	-1.37907	0.329292	-4.18798	2.81443e-05	0.000368923
Dmel_CG12535	4.78652	-1.37903	1.65028	-0.835632	0.403362	NA
Dmel_CG1942	7.26293	-1.37809	1.32902	-1.03692	0.299771	0.482234
Dmel_CG1524	6809.92	-1.37709	0.236438	-5.8243	5.73518e-09	1.97267e-07
Dmel_CG17084	18.0795	-1.3766	0.84942	-1.62063	0.105096	0.238386
Dmel_CG9390	822.868	-1.37546	0.221401	-6.21254	5.21338e-10	2.09485e-08
Dmel_CG31477	1.28193	-1.37509	3.06188	-0.449101	0.653359	NA
Dmel_CG5819	2.39783	-1.37503	2.20428	-0.623799	0.532759	NA
Dmel_CG9083	2.39783	-1.37503	2.20428	-0.623799	0.532759	NA
Dmel_CG42353	95.3721	-1.37256	0.407606	-3.36738	0.000758869	0.00582636
Dmel_CG7977	20017.6	-1.37095	0.218886	-6.26328	3.76962e-10	1.56594e-08
Dmel_CG18622	45.94	-1.36993	0.617209	-2.21955	0.026449	0.0895918
Dmel_CG11919	158.11	-1.36782	0.329859	-4.14668	3.37328e-05	0.000434234
Dmel_CG13617	2.26504	-1.36696	2.37193	-0.576309	0.564406	NA
Dmel_CG13806	2.45919	-1.36546	2.29544	-0.594858	0.551938	NA
Dmel_CG12489	144.177	-1.3646	0.343936	-3.96761	7.25966e-05	0.000835687
Dmel_CG1527	9119.99	-1.36423	0.265685	-5.13475	2.82516e-07	6.59693e-06
Dmel_CG18336	12.3414	-1.36405	1.00477	-1.35757	0.1746	0.33777
Dmel_CG5778	2.83689	-1.36395	2.1521	-0.633774	0.526229	NA
Dmel_CG13389	13979.6	-1.36393	0.234725	-5.81076	6.21915e-09	2.11377e-07
Dmel_CG6067	3.64104	-1.36214	1.85176	-0.73559	0.46198	NA
Dmel_CG6426	3.51026	-1.35961	1.94035	-0.700701	0.48349	NA
Dmel_CG11158	47.7991	-1.35854	0.547667	-2.48059	0.0131164	0.0531019
Dmel_CG17739	8.38527	-1.35818	1.20392	-1.12814	0.259263	0.436026
Dmel_CG17336	1.20791	-1.35637	3.15806	-0.429494	0.667563	NA
Dmel_CG18180	1.20791	-1.35637	3.15806	-0.429494	0.667563	NA
Dmel_CG33226	1.20791	-1.35637	3.15806	-0.429494	0.667563	NA
Dmel_CG5078	1.20791	-1.35637	3.15806	-0.429494	0.667563	NA
Dmel_CG43050	5.90002	-1.35635	1.45196	-0.934153	0.350225	NA
Dmel_CG10581	32.3511	-1.35626	0.644709	-2.10368	0.0354062	0.110329
Dmel_CG7881	8.80146	-1.35477	1.19117	-1.13734	0.255396	0.432314
Dmel_CG34379	241.643	-1.35431	0.362787	-3.73306	0.000189168	0.00184219
Dmel_CG8226	796.706	-1.35385	0.257573	-5.25618	1.47076e-07	3.70882e-06
Dmel_CG33253	2.46556	-1.35057	2.27079	-0.594759	0.552005	NA
Dmel_CG32533	322.456	-1.34882	0.278515	-4.8429	1.27959e-06	2.50073e-05
Dmel_CG42673	165.504	-1.34747	0.380467	-3.54161	0.000397693	0.00347184
Dmel_CG3661	17061.7	-1.34699	0.229899	-5.85905	4.65515e-09	1.63224e-07
Dmel_CG8776	82.1903	-1.34692	0.453122	-2.97253	0.00295355	0.0170148
Dmel_CG10157	281.308	-1.34684	0.298555	-4.51118	6.44672e-06	0.000104398
Dmel_CG42237	8.17698	-1.34661	1.28251	-1.04998	0.293728	0.475215
Dmel_CG3922	12739.1	-1.34625	0.238781	-5.63802	1.72015e-08	5.39837e-07
Dmel_CG10673	155.974	-1.34571	0.374604	-3.59236	0.000327694	0.00295992
Dmel_CG1621	160.592	-1.34416	0.333898	-4.02566	5.68148e-05	0.000682333
Dmel_CG30428	92.4942	-1.34308	0.412015	-3.25979	0.00111496	0.00782655
Dmel_CG4752	189.032	-1.34295	0.330638	-4.0617	4.87168e-05	0.000595051
Dmel_CG12073	1.18185	-1.34286	3.46902	-0.3871	0.698682	NA
Dmel_CG16762	1.18185	-1.34286	3.46902	-0.3871	0.698682	NA
Dmel_CG32304	1.18185	-1.34286	3.46902	-0.3871	0.698682	NA
Dmel_CG32161	3.52824	-1.34211	1.82057	-0.737192	0.461006	NA
Dmel_CG2854	7.05649	-1.3421	1.31472	-1.02082	0.307338	0.490953
Dmel_CG32644	163.314	-1.34097	0.49208	-2.72511	0.00642803	0.0309142
Dmel_CG30273	16.4854	-1.34024	0.899149	-1.49057	0.136075	0.287142
Dmel_CG2467	48.3097	-1.33914	0.536788	-2.49473	0.0126054	0.0516161
Dmel_CG32843	2.32034	-1.3386	2.32501	-0.57574	0.564791	NA
Dmel_CG9875	2.37367	-1.33845	2.18705	-0.61199	0.540545	NA
Dmel_CG4759	13352.9	-1.33834	0.239576	-5.58627	2.31998e-08	7.12484e-07
Dmel_CG34163	180.006	-1.3381	0.316945	-4.22187	2.42286e-05	0.000325533
Dmel_CG9050	639.834	-1.33772	0.2361	-5.66592	1.46236e-08	4.67467e-07
Dmel_CG45784	10.7335	-1.33757	1.08282	-1.23527	0.216729	0.388423
Dmel_CG13117	75.6161	-1.33706	0.524476	-2.54933	0.0107932	0.0458825
Dmel_CG7900	105.88	-1.33621	0.397427	-3.36216	0.000773364	0.00590599
Dmel_CG10245	5.93599	-1.3361	1.41792	-0.942298	0.34604	NA
Dmel_CG30484	2.34639	-1.33593	2.26745	-0.589179	0.555741	NA
Dmel_CG2033	12917	-1.33584	0.224847	-5.94112	2.8309e-09	1.02713e-07
Dmel_CG43998	5.89613	-1.33511	1.49694	-0.891893	0.372451	NA
Dmel_CG8268	578.175	-1.33336	0.274801	-4.85211	1.22156e-06	2.40371e-05
Dmel_CG7636	426.775	-1.33237	0.26866	-4.95932	7.07389e-07	1.49824e-05
Dmel_CG33126	62.3103	-1.33173	0.525885	-2.53236	0.0113296	0.0476376
Dmel_CG7908	2.44211	-1.33046	2.29952	-0.578582	0.562871	NA
Dmel_CG2062	4.6326	-1.32948	1.742	-0.76319	0.44535	NA
Dmel_CG18001	6210.77	-1.32775	0.210513	-6.3072	2.84134e-10	1.22777e-08
Dmel_CG31006	7.24397	-1.32747	1.29355	-1.02622	0.304787	0.487875
Dmel_CG45490	2.40775	-1.32685	2.29741	-0.577544	0.563572	NA
Dmel_CG1102	93.1115	-1.32671	0.425274	-3.11965	0.00181064	0.011516
Dmel_CG9847	616.386	-1.32592	0.272257	-4.87011	1.11536e-06	2.22528e-05
Dmel_CG17917	3.54623	-1.32562	1.81754	-0.72935	0.465788	NA
Dmel_CG32669	3.54623	-1.32562	1.81754	-0.72935	0.465788	NA
Dmel_CG14183	9.50021	-1.3254	1.16058	-1.14202	0.253446	0.430028
Dmel_CG4975	167.982	-1.32395	0.339739	-3.89697	9.74022e-05	0.00108212
Dmel_CG31072	308.032	-1.32395	0.306171	-4.32422	1.53069e-05	0.000222338
Dmel_CG9354	11873.1	-1.32377	0.233251	-5.67531	1.38434e-08	4.4584e-07
Dmel_CG8596	26.6861	-1.32139	0.741668	-1.78164	0.0748079	0.188147
Dmel_CG34368	8.23788	-1.32127	1.21689	-1.08577	0.277579	0.456446
Dmel_CG42806	353.008	-1.31984	0.314903	-4.19126	2.77406e-05	0.000364742
Dmel_CG4038	1620.38	-1.31827	0.217154	-6.07068	1.27372e-09	4.82497e-08
Dmel_CG10422	260.506	-1.31744	0.302897	-4.34945	1.36478e-05	0.000201992
Dmel_CG5621	6.99759	-1.31616	1.46141	-0.900609	0.367796	0.550223
Dmel_CG7952	3.4768	-1.3159	1.83914	-0.715498	0.474301	NA
Dmel_CG6971	2.33832	-1.31279	2.19501	-0.598081	0.549786	NA
Dmel_CG11674	2877.3	-1.31271	0.208516	-6.29548	3.06442e-10	1.31755e-08
Dmel_CG12385	1.19984	-1.31212	3.45006	-0.38032	0.703708	NA
Dmel_CG12811	430.323	-1.31166	0.274179	-4.78395	1.71885e-06	3.22716e-05
Dmel_CG5317	1217.75	-1.31118	0.25346	-5.17313	2.30207e-07	5.52947e-06
Dmel_CG31022	270.087	-1.31007	0.292357	-4.48105	7.42772e-06	0.000117843
Dmel_CG9422	413.76	-1.309	0.272549	-4.8028	1.56465e-06	2.95701e-05
Dmel_CG10021	150.512	-1.3084	0.343873	-3.80491	0.000141856	0.00147499
Dmel_CG17610	325.995	-1.3081	0.281549	-4.6461	3.38276e-06	5.9364e-05
Dmel_CG15427	94.3819	-1.30807	0.460667	-2.83951	0.0045183	0.0235187
Dmel_CG5435	22.2194	-1.30783	0.75982	-1.72123	0.0852083	0.206338
Dmel_CG33466	130.813	-1.30714	0.387118	-3.3766	0.000733865	0.00568514
Dmel_CG12759	392.225	-1.30691	0.270644	-4.82891	1.3728e-06	2.63499e-05
Dmel_CG6141	15105.1	-1.3049	0.244835	-5.32972	9.83659e-08	2.61064e-06
Dmel_CG9326	269.987	-1.30322	0.278351	-4.68194	2.84176e-06	5.08225e-05
Dmel_CG17178	1.13848	-1.303	3.49714	-0.372589	0.709454	NA
Dmel_CG43386	1.13848	-1.303	3.49714	-0.372589	0.709454	NA
Dmel_CG30100	97.0112	-1.30205	0.43002	-3.02789	0.00246271	0.0146959
Dmel_CG42372	97.0112	-1.30205	0.43002	-3.02789	0.00246271	0.0146959
Dmel_CG8900	10360.5	-1.30194	0.229974	-5.66125	1.50276e-08	4.78603e-07
Dmel_CG10460	154.836	-1.30017	0.355341	-3.65895	0.000253255	0.00238526
Dmel_CG7014	13443	-1.29961	0.223626	-5.81154	6.18994e-09	2.11219e-07
Dmel_CG3344	3.49479	-1.29926	1.83604	-0.707643	0.479167	NA
Dmel_CG4690	3.49479	-1.29926	1.83604	-0.707643	0.479167	NA
Dmel_CG32556	367.51	-1.29865	0.264574	-4.90845	9.17992e-07	1.87057e-05
Dmel_CG31803	2.26889	-1.2983	2.34987	-0.552496	0.580609	NA
Dmel_CG4757	10.4844	-1.29823	1.10817	-1.17151	0.241395	0.417573
Dmel_CG14544	259.922	-1.29737	0.31562	-4.11055	3.94725e-05	0.000497689
Dmel_CG31865	4.72069	-1.29647	1.7272	-0.75062	0.452881	NA
Dmel_CG3902	1278.49	-1.29625	0.244141	-5.30942	1.09977e-07	2.87444e-06
Dmel_CG3250	2.26764	-1.29348	2.62829	-0.492137	0.622622	NA
Dmel_CG4007	21.9615	-1.29152	0.758452	-1.70283	0.0885999	0.211913
Dmel_CG32091	289.988	-1.2915	0.277699	-4.65073	3.30766e-06	5.81648e-05
Dmel_CG5820	1744.4	-1.29072	0.206173	-6.26038	3.84042e-10	1.58137e-08
Dmel_CG32182	5.91246	-1.28992	1.5642	-0.824656	0.409567	NA
Dmel_CG14857	2.33025	-1.28925	2.29195	-0.562511	0.573768	NA
Dmel_CG18660	0.886549	-1.28842	3.52781	-0.365219	0.714948	NA
Dmel_CG11522	17416.5	-1.28653	0.241475	-5.3278	9.94078e-08	2.63018e-06
Dmel_CG32808	10.459	-1.28653	1.17239	-1.09735	0.272486	0.450425
Dmel_CG10286	838.187	-1.28523	0.220661	-5.82445	5.73008e-09	1.97267e-07
Dmel_CG17534	10.242	-1.28424	1.12372	-1.14284	0.253104	0.429618
Dmel_CG31918	406.242	-1.28418	0.284253	-4.51775	6.25012e-06	0.000101405
Dmel_CG5398	3.48672	-1.28312	1.83088	-0.700822	0.483414	NA
Dmel_CG31115	7.93777	-1.28085	1.31409	-0.974703	0.329708	0.512316
Dmel_CG9935	4.64293	-1.27969	1.61028	-0.794704	0.426786	NA
Dmel_CG15547	95.495	-1.27958	0.415762	-3.07769	0.00208614	0.0129069
Dmel_CG5258	1199.64	-1.27907	0.260487	-4.91029	9.09408e-07	1.85748e-05
Dmel_CG6172	1.10569	-1.27892	3.2659	-0.391599	0.695355	NA
Dmel_CG10242	30.9628	-1.27835	0.652084	-1.96041	0.0499483	0.141938
Dmel_CG10630	10.1905	-1.27506	1.12861	-1.12976	0.258576	0.435443
Dmel_CG12529	300.785	-1.273	0.271285	-4.69249	2.69894e-06	4.86544e-05
Dmel_CG4623	7.71241	-1.27287	1.39675	-0.911311	0.362132	0.544972
Dmel_CG43844	5.96593	-1.27256	1.41376	-0.900123	0.368055	NA
Dmel_CG15630	1.15647	-1.27242	3.4772	-0.365934	0.714414	NA
Dmel_CG5142	1.15647	-1.27242	3.4772	-0.365934	0.714414	NA
Dmel_CG7204	1.15647	-1.27242	3.4772	-0.365934	0.714414	NA
Dmel_CG32647	5.66972	-1.27222	1.46319	-0.869486	0.384581	NA
Dmel_CG6137	1402.95	-1.27109	0.20323	-6.25444	3.98944e-10	1.62584e-08
Dmel_CG12775	17060.3	-1.26947	0.230314	-5.51191	3.54962e-08	1.04891e-06
Dmel_CG7727	119.381	-1.26923	0.374965	-3.38494	0.000711934	0.0055402
Dmel_CG32554	43.1823	-1.26894	0.572397	-2.2169	0.0266301	0.0901191
Dmel_CG4858	230.397	-1.26889	0.309675	-4.09749	4.17645e-05	0.000523518
Dmel_CG13597	6.75011	-1.26741	1.37355	-0.922729	0.356149	0.538285
Dmel_CG10958	40.1488	-1.26643	0.60022	-2.10994	0.0348637	0.109493
Dmel_CG14796	1723.49	-1.26606	0.296967	-4.26331	2.01417e-05	0.000278902
Dmel_CG32280	107.61	-1.2659	0.383963	-3.29693	0.000977478	0.00706925
Dmel_CG7622	15315.4	-1.26401	0.229443	-5.50902	3.60832e-08	1.0626e-06
Dmel_CG9360	79.6113	-1.2622	0.457338	-2.75988	0.00578218	0.0286741
Dmel_CG11491	258.465	-1.26218	0.292757	-4.31135	1.62259e-05	0.000233713
Dmel_CG32717	575.374	-1.26189	0.246508	-5.11907	3.07053e-07	7.05976e-06
Dmel_CG43672	187.509	-1.26039	0.365918	-3.44445	0.000572219	0.00465516
Dmel_CG6931	4.56569	-1.26024	1.60042	-0.787444	0.431022	NA
Dmel_CG4637	4.59175	-1.25986	1.62154	-0.776951	0.437188	NA
Dmel_CG1442	1.13041	-1.25771	3.24642	-0.387415	0.698449	NA
Dmel_CG15517	1.13041	-1.25766	3.24643	-0.387399	0.698461	NA
Dmel_CG17154	1.13041	-1.25766	3.24643	-0.387399	0.698461	NA
Dmel_CG42344	2.77372	-1.25763	2.17234	-0.578926	0.562639	NA
Dmel_CG1461	0.286473	-1.25748	4.92379	-0.255388	0.798424	NA
Dmel_CG31991	320.077	-1.25718	0.269075	-4.67222	2.97963e-06	5.31574e-05
Dmel_CG17533	32.7638	-1.25589	0.642521	-1.95464	0.0506261	0.143291
Dmel_CG4114	373.762	-1.25302	0.254303	-4.92727	8.33852e-07	1.73195e-05
Dmel_CG2960	12713.6	-1.25273	0.243094	-5.15328	2.55972e-07	6.0798e-06
Dmel_CG7111	24841.4	-1.25247	0.243938	-5.13437	2.83087e-07	6.59693e-06
Dmel_CG1385	61.8618	-1.25233	0.533275	-2.34837	0.0188557	0.0699484
Dmel_CG12212	508.773	-1.25194	0.238229	-5.25518	1.47878e-07	3.71814e-06
Dmel_CG8495	15801.5	-1.25063	0.229435	-5.4509	5.01165e-08	1.41761e-06
Dmel_CG9815	27.5681	-1.2503	0.737783	-1.69467	0.0901374	0.214398
Dmel_CG11064	99.1926	-1.24947	0.498375	-2.50708	0.0121733	0.0502778
Dmel_CG5526	208.642	-1.24937	0.374785	-3.33358	0.000857375	0.00637731
Dmel_CG9780	3.33979	-1.2481	1.99994	-0.624069	0.532582	NA
Dmel_CG31017	2.27881	-1.24743	2.25668	-0.552774	0.580418	NA
Dmel_CG2099	6752.81	-1.24693	0.227622	-5.47808	4.29966e-08	1.23655e-06
Dmel_CG3483	2.30487	-1.24657	2.33517	-0.533825	0.593463	NA
Dmel_CG7009	120.631	-1.24656	0.374227	-3.33102	0.000865299	0.00642548
Dmel_CG2647	61.7167	-1.2461	0.487219	-2.55758	0.0105402	0.0450472
Dmel_CG8646	3.36585	-1.24532	1.8506	-0.672927	0.500994	NA
Dmel_CG3699	7.79269	-1.24532	1.29401	-0.962368	0.335865	0.519043
Dmel_CG2746	15605.3	-1.24392	0.247242	-5.03119	4.87455e-07	1.08311e-05
Dmel_CG12214	699.539	-1.24358	0.234824	-5.29577	1.18515e-07	3.07888e-06
Dmel_CG4249	490.542	-1.24206	0.25479	-4.87485	1.08889e-06	2.18259e-05
Dmel_CG9702	5.63918	-1.24176	1.48472	-0.836359	0.402953	NA
Dmel_CG6249	410.35	-1.24174	0.287037	-4.32606	1.51802e-05	0.00022162
Dmel_CG17140	3.02236	-1.24159	2.11508	-0.587019	0.557191	NA
Dmel_CG10249	219.711	-1.24051	0.332649	-3.72919	0.000192098	0.0018665
Dmel_CG31973	67.0538	-1.23996	0.456569	-2.71582	0.00661112	0.0316531
Dmel_CG1821	12842.8	-1.23904	0.24063	-5.14914	2.61681e-07	6.18186e-06
Dmel_CG10071	9526.83	-1.23887	0.244215	-5.07288	3.91834e-07	8.75164e-06
Dmel_CG7149	148.772	-1.2378	0.376045	-3.29162	0.000996133	0.007162
Dmel_CG15908	141.141	-1.23757	0.358586	-3.45125	0.000557996	0.00457844
Dmel_CG13609	99.6228	-1.23667	0.421505	-2.93393	0.00334701	0.0188727
Dmel_CG7339	252.813	-1.23602	0.317777	-3.88958	0.000100417	0.00110845
Dmel_CG3949	3468.1	-1.23318	0.234534	-5.25798	1.45648e-07	3.68361e-06
Dmel_CG17027	6.81043	-1.23261	1.34176	-0.918646	0.358281	0.540976
Dmel_CG3456	689.173	-1.23244	0.226688	-5.43674	5.42653e-08	1.51502e-06
Dmel_CG17786	50.1879	-1.23238	0.559401	-2.20303	0.0275925	0.0922863
Dmel_CG34383	310.617	-1.23038	0.329915	-3.7294	0.000191938	0.0018665
Dmel_CG1550	491.623	-1.22944	0.235695	-5.21623	1.82604e-07	4.49916e-06
Dmel_CG1883	22850.3	-1.22915	0.236738	-5.19202	2.08029e-07	5.0415e-06
Dmel_CG5948	1.1484	-1.22911	3.22863	-0.38069	0.703433	NA
Dmel_CG10842	1.1484	-1.22909	3.22863	-0.380685	0.703437	NA
Dmel_CG11659	1.1484	-1.22909	3.22863	-0.380685	0.703437	NA
Dmel_CG15239	1.1484	-1.22909	3.22863	-0.380685	0.703437	NA
Dmel_CG31956	1.1484	-1.22909	3.22863	-0.380685	0.703437	NA
Dmel_CG9150	1.1484	-1.22909	3.22863	-0.380685	0.703437	NA
Dmel_CG10305	17699.6	-1.22825	0.23634	-5.19694	2.02593e-07	4.93884e-06
Dmel_CG7726	11970.7	-1.22651	0.224577	-5.46144	4.72291e-08	1.34478e-06
Dmel_CG8881	7.75924	-1.22542	1.25744	-0.974538	0.32979	0.512351
Dmel_CG32018	192.524	-1.22517	0.359268	-3.41019	0.00064917	0.00516386
Dmel_CG42384	14.6143	-1.22517	0.925469	-1.32383	0.185558	0.351392
Dmel_CG42385	14.6143	-1.22517	0.925469	-1.32383	0.185558	0.351392
Dmel_CG42386	14.6143	-1.22517	0.925469	-1.32383	0.185558	0.351392
Dmel_CG42387	14.6143	-1.22517	0.925469	-1.32383	0.185558	0.351392
Dmel_CG2678	412.576	-1.22451	0.263254	-4.65144	3.29632e-06	5.81648e-05
Dmel_CG32816	200.22	-1.22422	0.313586	-3.90394	9.46403e-05	0.0010569
Dmel_CG32165	170.105	-1.22304	0.323635	-3.77906	0.00015742	0.00160767
Dmel_CG10153	84.6248	-1.22142	0.425251	-2.87223	0.00407593	0.0218101
Dmel_CG42330	2.15308	-1.21908	2.41852	-0.504059	0.61422	NA
Dmel_CG3337	182.15	-1.21631	0.334986	-3.63093	0.000282401	0.00262527
Dmel_CG8713	49.102	-1.2153	0.532933	-2.2804	0.0225838	0.0797201
Dmel_CG6331	30.2196	-1.2152	0.760784	-1.5973	0.110198	0.246064
Dmel_CG43051	18.8608	-1.21494	0.815364	-1.49006	0.13621	0.287232
Dmel_CG30495	8.70445	-1.21099	1.20675	-1.00351	0.315614	0.4991
Dmel_CG11147	74.0462	-1.21096	0.486605	-2.4886	0.0128248	0.0521421
Dmel_CG10462	1819.21	-1.20655	0.200097	-6.02982	1.64139e-09	6.16344e-08
Dmel_CG9001	15.4516	-1.2057	0.901993	-1.33671	0.181319	0.346818
Dmel_CG31343	2.22737	-1.20526	2.2482	-0.536097	0.591891	NA
Dmel_CG33852	341.147	-1.20428	0.307433	-3.91722	8.95753e-05	0.00100294
Dmel_CG2794	439.774	-1.20187	0.243986	-4.92597	8.39439e-07	1.73518e-05
Dmel_CG12324	278.031	-1.20115	0.30176	-3.98048	6.87771e-05	0.000799209
Dmel_CG33250	236.834	-1.19987	0.294808	-4.06999	4.70146e-05	0.000577541
Dmel_CG6878	277.207	-1.1992	0.310127	-3.86682	0.000110266	0.00119871
Dmel_CG5123	292.243	-1.19863	0.290073	-4.13217	3.59347e-05	0.000457104
Dmel_CG7365	8.78667	-1.19778	1.24652	-0.960901	0.336602	0.519555
Dmel_CG11276	26603.7	-1.19727	0.24595	-4.86795	1.12762e-06	2.24453e-05
Dmel_CG3260	401.767	-1.19696	0.285225	-4.19657	2.70993e-05	0.000359055
Dmel_CG31324	100.457	-1.19695	0.421266	-2.84132	0.00449269	0.0234421
Dmel_CG4897	21828.9	-1.19651	0.243076	-4.92236	8.55058e-07	1.76322e-05
Dmel_CG1106	342.321	-1.19639	0.274068	-4.36531	1.2694e-05	0.000190832
Dmel_CG15085	27.5131	-1.19495	0.681091	-1.75446	0.0793515	0.196132
Dmel_CG9091	15294.2	-1.19455	0.240617	-4.96454	6.88645e-07	1.46576e-05
Dmel_CG3756	367.68	-1.19285	0.279685	-4.26499	1.99911e-05	0.000277263
Dmel_CG31116	79.5408	-1.19033	0.425496	-2.79751	0.00514982	0.0259958
Dmel_CG14204	2.15794	-1.18901	2.39296	-0.496875	0.619277	NA
Dmel_CG7227	4.17532	-1.18895	1.79206	-0.663456	0.507038	NA
Dmel_CG42821	8.87603	-1.18892	1.18453	-1.00371	0.31552	0.4991
Dmel_CG11889	7.24781	-1.18724	1.3135	-0.90387	0.366065	0.548629
Dmel_CG5492	1196.73	-1.18667	0.234776	-5.05449	4.31543e-07	9.61357e-06
Dmel_CG10341	541.918	-1.18655	0.269507	-4.40266	1.06933e-05	0.000164233
Dmel_CG11411	3446.44	-1.18641	0.197715	-6.00061	1.96578e-09	7.28611e-08
Dmel_CG3425	51.4707	-1.18618	0.519665	-2.28258	0.0224553	0.0794621
Dmel_CG33557	12.0956	-1.18553	1.00256	-1.1825	0.237006	0.413307
Dmel_CG8669	4268.87	-1.18498	0.212814	-5.56815	2.57464e-08	7.79553e-07
Dmel_CG9990	164.857	-1.18486	0.342584	-3.4586	0.000542983	0.00447233
Dmel_CG18522	505.354	-1.1826	0.240526	-4.91671	8.80091e-07	1.8105e-05
Dmel_CG14307	128.503	-1.18258	0.388496	-3.04399	0.00233466	0.0140783
Dmel_CG12765	141.45	-1.18234	0.361132	-3.27398	0.00106045	0.00750994
Dmel_CG13418	262.121	-1.18148	0.296901	-3.97938	6.90965e-05	0.000800756
Dmel_CG14786	675.855	-1.17983	0.228971	-5.15278	2.56654e-07	6.0798e-06
Dmel_CG14483	168.919	-1.17913	0.341833	-3.44945	0.00056173	0.0046003
Dmel_CG18627	176.685	-1.17806	0.327218	-3.60024	0.000317928	0.00290527
Dmel_CG3048	42.4855	-1.17602	0.563991	-2.08518	0.0370532	0.113834
Dmel_CG17521	20260	-1.17469	0.224693	-5.22798	1.71372e-07	4.23457e-06
Dmel_CG13369	404.977	-1.17463	0.294262	-3.99176	6.55837e-05	0.00076833
Dmel_CG7059	9.69907	-1.17272	1.13198	-1.03599	0.300206	0.482609
Dmel_CG9279	14.1507	-1.17258	0.930976	-1.25952	0.207843	0.378573
Dmel_CG12273	198.941	-1.17251	0.333161	-3.51935	0.000432602	0.00371252
Dmel_CG13010	1.07897	-1.17215	3.26836	-0.358636	0.719867	NA
Dmel_CG14909	1.07897	-1.17215	3.26836	-0.358636	0.719867	NA
Dmel_CG15749	1.07897	-1.17215	3.26836	-0.358636	0.719867	NA
Dmel_CG31659	1.07897	-1.17215	3.26836	-0.358636	0.719867	NA
Dmel_CG31924	1.07897	-1.17215	3.26836	-0.358636	0.719867	NA
Dmel_CG8584	1.07897	-1.17215	3.26836	-0.358636	0.719867	NA
Dmel_CG8256	125.895	-1.17214	0.358036	-3.2738	0.00106112	0.00750994
Dmel_CG10119	487.659	-1.17132	0.256685	-4.56324	5.03697e-06	8.50941e-05
Dmel_CG6769	839.196	-1.17118	0.24264	-4.82683	1.38721e-06	2.65671e-05
Dmel_CG1358	316.38	-1.17104	0.273313	-4.28463	1.83045e-05	0.000258457
Dmel_CG12946	8.88836	-1.17071	1.16887	-1.00157	0.316552	0.500005
Dmel_CG14375	2.14987	-1.17029	2.69801	-0.43376	0.664462	NA
Dmel_CG16874	1231.31	-1.16819	0.253881	-4.60134	4.19785e-06	7.16216e-05
Dmel_CG42391	2.11457	-1.16812	2.69185	-0.433946	0.664328	NA
Dmel_CG17855	4.26445	-1.16777	1.77559	-0.65768	0.510743	NA
Dmel_CG5002	17.3189	-1.16724	0.874336	-1.33501	0.181874	0.347586
Dmel_CG15693	12791.9	-1.16592	0.240521	-4.84746	1.25049e-06	2.45502e-05
Dmel_CG32267	400.634	-1.16515	0.279372	-4.17062	3.03773e-05	0.000393988
Dmel_CG8363	459.676	-1.16373	0.25601	-4.54563	5.47724e-06	9.1632e-05
Dmel_CG42368	17.3721	-1.16356	0.844227	-1.37825	0.168125	0.329677
Dmel_CG2998	9839.7	-1.16307	0.233753	-4.97565	6.503e-07	1.39798e-05
Dmel_CG14013	2.17593	-1.16227	2.25498	-0.515425	0.606256	NA
Dmel_CG32281	163.591	-1.16224	0.331893	-3.50185	0.000462038	0.00393372
Dmel_CG18031	8.75584	-1.16191	1.21101	-0.959456	0.337329	0.520211
Dmel_CG3502	3.18547	-1.15984	2.01266	-0.576272	0.564432	NA
Dmel_CG7985	188.094	-1.15914	0.318769	-3.63631	0.000276574	0.00257667
Dmel_CG31868	371.082	-1.15811	0.256093	-4.52222	6.11936e-06	9.96598e-05
Dmel_CG15067	5.69192	-1.15648	1.59035	-0.727181	0.467115	NA
Dmel_CG3380	7.46791	-1.15639	1.31432	-0.87984	0.378946	0.559601
Dmel_CG34112	7.61264	-1.15631	1.31386	-0.880085	0.378813	0.559501
Dmel_CG4045	333.201	-1.15436	0.297748	-3.87697	0.000105766	0.0011551
Dmel_CG16959	5.39414	-1.15164	1.50849	-0.763436	0.445204	NA
Dmel_CG4974	293.818	-1.15115	0.267503	-4.3033	1.68269e-05	0.000241158
Dmel_CG7322	269.377	-1.14974	0.318611	-3.6086	0.000307853	0.0028222
Dmel_CG4104	63.9284	-1.14909	0.569268	-2.01855	0.0435344	0.128471
Dmel_CG14931	587.217	-1.14766	0.241932	-4.74373	2.09823e-06	3.8786e-05
Dmel_CG34405	177.794	-1.1474	0.334088	-3.43443	0.000593801	0.00479446
Dmel_CG14948	2.1065	-1.14434	2.41559	-0.47373	0.635693	NA
Dmel_CG10264	1.09696	-1.14352	3.24931	-0.351927	0.724893	NA
Dmel_CG1946	1.09696	-1.14352	3.24931	-0.351927	0.724893	NA
Dmel_CG44123	1.09696	-1.14352	3.24931	-0.351927	0.724893	NA
Dmel_CG5246	1.09696	-1.14352	3.24931	-0.351927	0.724893	NA
Dmel_CG4491	58.3949	-1.14341	0.489591	-2.33544	0.0195206	0.0716646
Dmel_CG1263	22403.4	-1.14284	0.229619	-4.97714	6.45315e-07	1.39074e-05
Dmel_CG33108	23.4511	-1.1422	0.766075	-1.49098	0.135967	0.287064
Dmel_CG12758	58.3507	-1.14125	0.516634	-2.209	0.0271745	0.0915337
Dmel_CG8386	270.554	-1.14007	0.292757	-3.89425	9.85041e-05	0.00109154
Dmel_CG31449	23.1501	-1.13757	2.6053	-0.436636	0.662375	0.787687
Dmel_CG17489	25931.5	-1.13679	0.229331	-4.95696	7.16057e-07	1.50916e-05
Dmel_CG12101	8412.46	-1.13671	0.189802	-5.98892	2.11244e-09	7.76278e-08
Dmel_CG8615	16768.5	-1.13566	0.260325	-4.36247	1.28602e-05	0.000192656
Dmel_CG46149	250.103	-1.13464	0.283392	-4.00377	6.23398e-05	0.000736484
Dmel_CG7366	9.71579	-1.13415	1.12207	-1.01076	0.31213	0.495754
Dmel_CG10307	15.566	-1.13344	0.915007	-1.23872	0.215448	0.387095
Dmel_CG11768	6.45097	-1.13303	1.3741	-0.824565	0.409619	0.587934
Dmel_CG34207	20.1796	-1.13241	0.813054	-1.39278	0.163686	0.32387
Dmel_CG10580	102.274	-1.13154	0.413957	-2.73346	0.00626719	0.0302932
Dmel_CG14787	16.0973	-1.13104	0.882997	-1.28091	0.200224	0.368836
Dmel_CG14980	146.305	-1.12951	0.335896	-3.36269	0.00077188	0.00590599
Dmel_CG8415	17234.5	-1.12933	0.239345	-4.71842	2.37682e-06	4.35784e-05
Dmel_CG6779	12561.8	-1.12898	0.235706	-4.7898	1.6695e-06	3.14137e-05
Dmel_CG33183	71.883	-1.12679	0.444496	-2.53499	0.011245	0.0473999
Dmel_CG12290	166.94	-1.12518	0.360324	-3.1227	0.00179202	0.0114399
Dmel_CG15697	12891.5	-1.12455	0.241782	-4.65109	3.30187e-06	5.81648e-05
Dmel_CG10808	3.22145	-1.1245	1.88049	-0.597986	0.549849	NA
Dmel_CG14050	5.40838	-1.12295	1.47124	-0.763268	0.445304	NA
Dmel_CG3027	110.262	-1.12293	0.387232	-2.8999	0.0037328	0.0204147
Dmel_CG6341	11638.3	-1.12293	0.255772	-4.39037	1.13157e-05	0.000171914
Dmel_CG10062	50.3461	-1.12227	0.528609	-2.12307	0.0337483	0.107007
Dmel_CG11858	318.73	-1.12213	0.293598	-3.82198	0.000132386	0.00140195
Dmel_CG33002	251.774	-1.12199	0.312627	-3.58892	0.00033205	0.00298927
Dmel_CG3751	13992.2	-1.12122	0.246791	-4.54319	5.54082e-06	9.21577e-05
Dmel_CG40002	1002.15	-1.12093	0.225515	-4.97053	6.67715e-07	1.42828e-05
Dmel_CG8675	581.542	-1.12053	0.235139	-4.76541	1.88469e-06	3.50789e-05
Dmel_CG3593	1660.16	-1.12019	0.224019	-5.00042	5.72063e-07	1.24536e-05
Dmel_CG7563	280.911	-1.12004	0.270723	-4.13721	3.5155e-05	0.000449179
Dmel_CG8332	15918.3	-1.11967	0.24245	-4.61812	3.87225e-06	6.7132e-05
Dmel_CG6957	49.2881	-1.11891	0.532068	-2.10295	0.0354704	0.110391
Dmel_CG7414	6288.03	-1.11739	0.197052	-5.67055	1.42341e-08	4.56711e-07
Dmel_CG15385	13.5991	-1.11717	1.00973	-1.10641	0.268551	0.446409
Dmel_CG4464	20212.4	-1.11665	0.238506	-4.68186	2.84285e-06	5.08225e-05
Dmel_CG42230	461.839	-1.11519	0.239054	-4.66501	3.08608e-06	5.49424e-05
Dmel_CG6912	72.1286	-1.11473	0.469035	-2.37664	0.0174711	0.0660298
Dmel_CG15406	20.1844	-1.11414	0.846374	-1.31637	0.18805	0.354537
Dmel_CG7266	257.325	-1.11382	0.278497	-3.99938	6.35082e-05	0.000749118
Dmel_CG31391	7.46236	-1.1128	1.26181	-0.881907	0.377827	0.55862
Dmel_CG7574	376.656	-1.11274	0.252328	-4.40991	1.03414e-05	0.000159651
Dmel_CG1468	3.12596	-1.11227	2.04557	-0.543745	0.586617	NA
Dmel_CG14543	264.588	-1.11166	0.288193	-3.85733	0.000114633	0.00123835
Dmel_CG4531	74.2308	-1.11104	0.44437	-2.50027	0.0124099	0.0510343
Dmel_CG31381	207.349	-1.10959	0.321929	-3.44671	0.000567463	0.00463819
Dmel_CG1410	455.164	-1.10953	0.244162	-4.54424	5.5133e-06	9.18777e-05
Dmel_CG34132	576.897	-1.10859	0.258587	-4.2871	1.81018e-05	0.000256015
Dmel_CG12655	8.38517	-1.10795	1.23182	-0.899442	0.368417	0.550673
Dmel_CG14785	25.1034	-1.10766	0.762975	-1.45177	0.146566	0.302236
Dmel_CG1220	9.47504	-1.10754	1.16651	-0.949444	0.342395	0.524449
Dmel_CG3994	1798.86	-1.10712	0.239481	-4.62298	3.78271e-06	6.58453e-05
Dmel_CG13185	2205.75	-1.10642	0.24458	-4.52377	6.07485e-06	9.91227e-05
Dmel_CG3090	308.545	-1.10641	0.27011	-4.09617	4.20047e-05	0.000525762
Dmel_CG10944	18960.5	-1.10602	0.243952	-4.53378	5.79381e-06	9.58095e-05
Dmel_CG10063	12.7395	-1.1053	1.00846	-1.09603	0.273065	0.450948
Dmel_CG6362	4.26697	-1.105	1.66286	-0.66452	0.506357	NA
Dmel_CG11246	402.869	-1.10493	0.275275	-4.01393	5.97171e-05	0.000709468
Dmel_CG10016	3.26665	-1.10469	1.86948	-0.59091	0.554581	NA
Dmel_CG9953	2924.32	-1.10385	0.214096	-5.15585	2.52482e-07	6.0141e-06
Dmel_CG13533	493.206	-1.10376	0.262783	-4.20028	2.66583e-05	0.000354304
Dmel_CG4264	66203.4	-1.10054	0.197147	-5.58235	2.37285e-08	7.26126e-07
Dmel_CG12134	565.774	-1.10013	0.255797	-4.3008	1.70181e-05	0.000243088
Dmel_CG7997	575.818	-1.09799	0.259402	-4.23279	2.30805e-05	0.000314532
Dmel_CG9282	14775.8	-1.09604	0.226282	-4.8437	1.27446e-06	2.49637e-05
Dmel_CG3568	20.091	-1.09577	0.798897	-1.3716	0.170187	0.331756
Dmel_CG34315	4.19754	-1.09532	1.65525	-0.661722	0.508149	NA
Dmel_CG3566	250.82	-1.09439	0.29477	-3.71268	0.000205078	0.00198142
Dmel_CG4822	87.9738	-1.09436	0.479595	-2.28184	0.0224989	0.0795182
Dmel_CG4651	22083.2	-1.09368	0.242481	-4.51037	6.4715e-06	0.000104602
Dmel_CG7391	29.0476	-1.09322	0.690953	-1.58219	0.113606	0.251519
Dmel_CG11089	1614.41	-1.09299	0.197404	-5.5368	3.08047e-08	9.16572e-07
Dmel_CG5157	5.28643	-1.09243	1.48619	-0.735057	0.462305	NA
Dmel_CG18675	3.14395	-1.09233	1.9151	-0.570378	0.568421	NA
Dmel_CG14206	17407.1	-1.09144	0.239455	-4.55802	5.16393e-06	8.68975e-05
Dmel_CG6231	198.185	-1.09062	0.313651	-3.47719	0.000506696	0.00424667
Dmel_CG8095	415.237	-1.09013	0.247896	-4.39755	1.09482e-05	0.000167218
Dmel_CG5987	18.7417	-1.08998	0.826248	-1.31919	0.187105	0.353274
Dmel_CG6218	365.073	-1.08878	0.260673	-4.1768	2.95638e-05	0.000384598
Dmel_CG11654	8559.06	-1.0878	0.235881	-4.61166	3.99472e-06	6.8794e-05
Dmel_CG4784	6.27059	-1.08744	1.37418	-0.791334	0.428749	0.604474
Dmel_CG3817	390.538	-1.0869	0.281375	-3.86283	0.00011208	0.0012123
Dmel_CG18505	218.775	-1.08591	0.306018	-3.54853	0.000387384	0.00339231
Dmel_CG14685	362.482	-1.08585	0.256557	-4.23238	2.31227e-05	0.000314607
Dmel_CG1381	811.454	-1.08475	0.252194	-4.30126	1.69829e-05	0.000242989
Dmel_CG30197	46.839	-1.08428	0.547372	-1.98088	0.0476042	0.137218
Dmel_CG5773	2.29421	-1.08416	2.22628	-0.486981	0.626272	NA
Dmel_CG15442	20253.8	-1.08377	0.220667	-4.91134	9.0458e-07	1.85202e-05
Dmel_CG7264	5.47331	-1.08284	1.4595	-0.741923	0.458134	NA
Dmel_CG34138	1.02753	-1.08199	3.34605	-0.323364	0.74642	NA
Dmel_CG33533	1.02753	-1.08199	3.34605	-0.323364	0.74642	NA
Dmel_CG45603	1.02753	-1.08199	3.34605	-0.323364	0.74642	NA
Dmel_CG6702	3.07498	-1.08194	2.04641	-0.528702	0.597012	NA
Dmel_CG5827	5647.05	-1.08192	0.259267	-4.17298	3.00638e-05	0.000390512
Dmel_CG7620	132.552	-1.08124	0.358652	-3.01473	0.0025721	0.015264
Dmel_CG13868	271.098	-1.07888	0.298663	-3.61235	0.00030344	0.00279068
[truncated: 11,975 more rows]
