# Supplementary material for: Molecular Insights into Female Hybrid Sterility in Interspecific Crosses between <em>Drosophila melanogaster</em> and <em>Drosophila simulans</em>
Source: Preprints.org preprint supplement (doi:10.20944/preprints202404.1438.v1), 2024-04-23
Supplement: Supplementary file 1 [file supplementary › Table S2.xlsx]

## Sheet: Лист1
	Table S2. DEseq analysis hybrid versus D. simulans ovaries
	baseMean	log2FoldChange	lfcSE	stat	pvalue	padj
LOC120284189	887.344	-0.251377	0.136171	-1.84604	0.0648859	0.140007
LOC120284190	1.31188	-1.6558	3.07511	-0.538451	0.590266	NA
LOC120284191	231.806	-0.3493	0.240959	-1.44962	0.147164	0.264661
LOC120284192	618.963	-0.950529	0.180594	-5.26335	1.41455e-07	1.54654e-06
LOC120284193	0	NA	NA	NA	NA	NA
LOC120284195	0	NA	NA	NA	NA	NA
LOC120284196	10.5369	5.70938	1.6868	3.38475	0.000712442	0.00330314
LOC120284197	186.202	0.00713952	0.260612	0.0273952	0.978145	0.986308
LOC120284198	1.09876	-3.21113	3.44561	-0.931946	0.351364	NA
LOC120284199	0	NA	NA	NA	NA	NA
LOC120284200	1536.82	-0.0477399	0.113526	-0.420519	0.674106	0.780325
LOC120284201	67.5313	-0.79833	0.556008	-1.43583	0.151052	0.269893
LOC120284202	0	NA	NA	NA	NA	NA
LOC120284203	111.648	0.169796	0.326094	0.520698	0.602578	0.729713
LOC120284204	1.11378	-1.30716	3.24628	-0.402665	0.687195	NA
LOC120284205	500.149	0.533071	0.169935	3.13691	0.0017074	0.00700017
LOC120284206	1898.6	0.0203884	0.120451	0.169267	0.865587	0.918614
LOC120284207	1.99156	0.864356	2.28454	0.378349	0.705171	NA
LOC120284208	4608.31	0.281427	0.093328	3.01546	0.00256592	0.00986602
LOC120284210	1.77868	-2.16867	2.78589	-0.778446	0.436306	NA
LOC120284211	0.799769	-2.74356	3.92572	-0.698869	0.484634	NA
LOC120284212	0.250389	-0.982176	4.95834	-0.198086	0.842978	NA
LOC120284213	467.811	0.232156	0.17277	1.34373	0.179035	0.305537
LOC120284214	1.58326	-2.04974	2.88556	-0.710343	0.477491	NA
LOC120284215	0.298991	-1.37233	4.92304	-0.278757	0.780432	NA
LOC120284216	3.83756	0.0334993	1.66772	0.0200869	0.983974	NA
LOC120284217	75.6839	-2.61294	0.546098	-4.78474	1.71208e-06	1.52429e-05
LOC120284218	0	NA	NA	NA	NA	NA
LOC120284219	0	NA	NA	NA	NA	NA
LOC120284221	0	NA	NA	NA	NA	NA
LOC120284222	555.711	0.0673536	0.175056	0.384753	0.70042	0.800493
LOC120284224	141.447	1.06778	0.309107	3.4544	0.000551523	0.00264031
LOC120284230	0	NA	NA	NA	NA	NA
LOC120284233	9.95875	-1.27891	1.09869	-1.16402	0.244415	0.383509
LOC120284234	641.811	2.16126	0.157878	13.6895	1.1739e-42	2.04793e-40
LOC120284240	23.5818	1.16207	0.775209	1.49904	0.133864	0.245751
LOC120284246	0	NA	NA	NA	NA	NA
LOC120284253	190.627	6.64284	0.524735	12.6594	9.92161e-37	1.28733e-34
LOC120284254	10.0215	-0.463369	1.0725	-0.432046	0.665708	0.773649
LOC120284258	0.996998	3.80425	3.98899	0.953686	0.340242	NA
LOC120284326	1.15105	-3.25628	3.44895	-0.944137	0.3451	NA
LOC120284336	15.2426	0.0875242	2.45651	0.0356295	0.971578	0.982378
LOC120284337	137.501	-0.416998	1.50774	-0.276572	0.782109	0.859132
LOC120284338	0	NA	NA	NA	NA	NA
LOC120284339	1.94713	-4.04027	2.77559	-1.45565	0.145491	NA
LOC120284346	171.398	1.67523	0.275623	6.07799	1.21695e-09	1.83856e-08
LOC120284347	20.8364	-0.84003	0.760223	-1.10498	0.269169	0.411876
LOC120284348	2.44885	-2.48779	2.4464	-1.01692	0.309192	NA
LOC120284352	873.329	0.207179	0.146343	1.41571	0.156859	0.277336
LOC120284353	0.31401	2.17029	4.99541	0.434457	0.663957	NA
LOC120284354	247.376	-0.709319	0.249501	-2.84295	0.00446975	0.015838
LOC120284356	7.09601	2.73867	1.50566	1.81891	0.0689245	0.146925
LOC120284357	202.149	1.55787	0.253578	6.14357	8.06865e-10	1.25334e-08
LOC120284358	7.16758	-0.0772154	1.34094	-0.057583	0.954081	0.971702
LOC120284359	0	NA	NA	NA	NA	NA
LOC120284361	34.8918	8.93725	3.91656	2.28192	0.0224943	0.0599961
LOC120284364	0	NA	NA	NA	NA	NA
LOC120284372	10.4094	0.908822	1.04488	0.869782	0.384419	0.534131
LOC120284377	8.69523	-0.746632	1.15002	-0.649235	0.516187	0.656524
LOC120284384	0	NA	NA	NA	NA	NA
LOC120284401	11.1956	-0.23376	1.00269	-0.233132	0.815659	0.883447
LOC120284403	0.149495	-0.604684	4.97921	-0.121442	0.903341	NA
LOC120284404	0	NA	NA	NA	NA	NA
LOC120284406	0	NA	NA	NA	NA	NA
LOC120284407	0	NA	NA	NA	NA	NA
LOC120284408	0	NA	NA	NA	NA	NA
LOC120284411	0	NA	NA	NA	NA	NA
LOC120284417	2.09663	-4.1484	2.70668	-1.53265	0.125362	NA
LOC120284422	5.97657	-0.131994	1.58862	-0.0830874	0.933782	0.957995
LOC120284425	0	NA	NA	NA	NA	NA
LOC120284426	0.298991	-1.37233	4.92304	-0.278757	0.780432	NA
LOC120284433	0	NA	NA	NA	NA	NA
LOC120284434	4915.6	6.60241	0.139438	47.35	0	0
LOC120284436	797.415	0.502218	0.185573	2.70631	0.00680364	0.0224658
LOC120284440	150.648	0.00136835	0.285343	0.00479547	0.996174	0.997291
LOC120284441	560.958	0.471085	0.172981	2.72334	0.00646261	0.0215249
LOC120284444	0.298991	-1.37233	4.92304	-0.278757	0.780432	NA
LOC120284445	0	NA	NA	NA	NA	NA
LOC120284447	26.1361	-1.78791	0.877352	-2.03785	0.0415647	0.0981074
LOC120284448	416.632	0.220483	0.185435	1.18901	0.234437	0.372029
LOC120284451	2.44791	-4.36381	2.55649	-1.70695	0.0878309	NA
LOC120284462	4.23681	0.216018	1.62045	0.133307	0.893951	NA
LOC120284472	0	NA	NA	NA	NA	NA
LOC120284482	146.952	-0.728131	0.314637	-2.31419	0.020657	0.0559066
LOC120284483	0	NA	NA	NA	NA	NA
LOC120284484	0	NA	NA	NA	NA	NA
LOC120284485	0	NA	NA	NA	NA	NA
LOC120284486	0	NA	NA	NA	NA	NA
LOC120284488	0	NA	NA	NA	NA	NA
LOC120284604	0.896972	-2.93725	4.1419	-0.709155	0.478228	NA
LOC120284694	0	NA	NA	NA	NA	NA
LOC120284695	119.266	-0.0833251	0.332792	-0.250382	0.802292	0.873688
LOC120284696	0.31401	2.17029	4.99541	0.434457	0.663957	NA
LOC120284703	0	NA	NA	NA	NA	NA
LOC120284704	0	NA	NA	NA	NA	NA
LOC120284706	0.149495	-0.604684	4.97921	-0.121442	0.903341	NA
LOC120284707	16.6848	-0.786183	0.843212	-0.932367	0.351147	0.501216
LOC120284720	0	NA	NA	NA	NA	NA
LOC120284721	0	NA	NA	NA	NA	NA
LOC120284722	0	NA	NA	NA	NA	NA
LOC120284724	0	NA	NA	NA	NA	NA
LOC120284725	0	NA	NA	NA	NA	NA
LOC120284726	0	NA	NA	NA	NA	NA
LOC120284727	0.911992	-0.936335	3.81381	-0.245512	0.80606	NA
LOC120284728	0	NA	NA	NA	NA	NA
LOC120284733	0	NA	NA	NA	NA	NA
LOC120284734	0	NA	NA	NA	NA	NA
LOC120284735	0.650274	-2.43702	4.30458	-0.566146	0.571294	NA
LOC120284736	2.18942	3.19453	2.54344	1.25599	0.209121	NA
LOC120284738	70.3685	1.21249	0.456945	2.65348	0.00796672	0.0256497
LOC120284748	0	NA	NA	NA	NA	NA
LOC120284750	5.26267	-0.104203	1.66981	-0.0624042	0.950241	0.969358
LOC120284754	0.795838	1.83084	3.71852	0.492357	0.622467	NA
LOC120284755	16.3262	-1.20689	0.880969	-1.36996	0.170699	0.294558
LOC120284756	0.31401	2.17029	4.99541	0.434457	0.663957	NA
LOC120284757	89.2343	-0.0609493	0.370562	-0.164478	0.869355	0.920696
LOC120284761	0.448486	-1.94496	4.87837	-0.39869	0.690122	NA
LOC120284767	0	NA	NA	NA	NA	NA
LOC120284773	2.88113	-2.96255	2.34329	-1.26427	0.206133	NA
LOC120284774	0	NA	NA	NA	NA	NA
LOC120284775	140.254	2.26411	0.340397	6.65138	2.90362e-11	5.34837e-10
LOC120284776	37.5422	-1.86903	0.590413	-3.16563	0.00154748	0.00645859
LOC120284777	0.298991	-1.37233	4.92304	-0.278757	0.780432	NA
LOC120284780	10.8036	-0.845121	1.03477	-0.816726	0.414085	0.562379
LOC120284782	1.67755	0.462658	2.47814	0.186695	0.8519	NA
LOC120284783	0	NA	NA	NA	NA	NA
LOC120284786	19.5708	-2.92821	0.910524	-3.21596	0.00130008	0.0055494
LOC120284788	0	NA	NA	NA	NA	NA
LOC120284789	0	NA	NA	NA	NA	NA
LOC120284790	5.30616	-1.62028	1.53528	-1.05536	0.291258	0.438129
LOC120284791	1.70783	0.30828	2.65096	0.11629	0.907423	NA
LOC120284794	0	NA	NA	NA	NA	NA
LOC120284795	0	NA	NA	NA	NA	NA
LOC120284800	259.301	0.378073	0.228767	1.65266	0.0984006	0.194486
LOC120284801	0	NA	NA	NA	NA	NA
LOC120284805	0	NA	NA	NA	NA	NA
LOC120284806	126.099	-0.0518674	0.32098	-0.16159	0.871628	0.92252
LOC120284814	845.371	0.122723	0.138713	0.884721	0.376307	0.525974
LOC120284815	350.493	0.102902	0.210773	0.488213	0.625399	0.747075
LOC120284821	77.5406	4.88425	0.559638	8.72753	2.60292e-18	9.37371e-17
LOC120284822	12.5462	4.12034	1.21709	3.3854	0.000710748	0.00329875
LOC120284823	10.477	-1.89863	1.12912	-1.68151	0.0926639	0.185475
LOC120284824	0	NA	NA	NA	NA	NA
LOC120284825	0	NA	NA	NA	NA	NA
LOC120284826	0	NA	NA	NA	NA	NA
LOC120284827	0	NA	NA	NA	NA	NA
LOC120284830	220.888	0.738122	0.246994	2.98842	0.00280421	0.0106187
LOC120284833	6233.26	6.34155	0.116967	54.2164	0	0
LOC120284835	0.399884	-1.7421	4.89227	-0.356093	0.721771	NA
LOC120284836	2.04385	0.852779	2.47807	0.34413	0.730749	NA
LOC120284843	0	NA	NA	NA	NA	NA
LOC120284845	8.13799	0.325746	1.17024	0.278357	0.780738	0.858374
LOC120284846	2.5974	-4.4509	2.50633	-1.77586	0.0757553	NA
LOC120284850	173.046	-0.40864	0.276682	-1.47693	0.139693	0.253551
LOC120284921	0	NA	NA	NA	NA	NA
LOC120284922	0.149495	-0.604684	4.97921	-0.121442	0.903341	NA
LOC120284925	0.613001	0.0504208	4.48317	0.0112467	0.991027	NA
LOC120284927	54.7134	2.33576	0.540345	4.32273	1.54109e-05	0.00011228
LOC120284928	0	NA	NA	NA	NA	NA
LOC120284931	0.448486	-1.94496	4.87837	-0.39869	0.690122	NA
LOC120284939	8.13799	0.325746	1.17024	0.278357	0.780738	0.858374
LOC120284941	0.777516	1.798	4.06627	0.442175	0.658362	NA
LOC120284948	154.224	6.50481	0.555847	11.7025	1.23741e-31	1.1028e-29
LOC120284949	847.541	-1.16564	0.148271	-7.86153	3.79466e-15	1.06286e-13
LOC120284954	66.2076	1.04021	2.04502	0.508653	0.610995	0.73715
LOC120284956	0	NA	NA	NA	NA	NA
LOC120284957	0	NA	NA	NA	NA	NA
LOC120284962	34.8918	8.93725	3.91656	2.28192	0.0224943	0.0599961
LOC120284963	0.597981	-2.35333	4.85554	-0.48467	0.627911	NA
LOC120284968	10.531	0.0684706	1.33449	0.0513083	0.95908	0.974924
LOC120284969	399.711	-2.06276	1.18273	-1.74406	0.081148	0.166615
LOC120284972	0.298991	-1.37233	4.92304	-0.278757	0.780432	NA
LOC120284974	0	NA	NA	NA	NA	NA
LOC120284975	1324.23	5.16559	0.725977	7.11536	1.1162e-12	2.48067e-11
LOC120284976	1.16544	0.456828	3.4222	0.13349	0.893806	NA
LOC120284980	0.399884	-1.7421	4.89227	-0.356093	0.721771	NA
LOC120284983	0	NA	NA	NA	NA	NA
LOC120284991	0	NA	NA	NA	NA	NA
LOC120284994	89.9699	10.3035	1.48656	6.93108	4.17649e-12	8.56957e-11
LOC120284997	84.7689	-2.29646	0.494482	-4.64418	3.41435e-06	2.88829e-05
LOC120284998	0	NA	NA	NA	NA	NA
LOC120285000	0.481828	0.867353	4.97421	0.17437	0.861575	NA
LOC120285001	0.149495	-0.604684	4.97921	-0.121442	0.903341	NA
LOC120285002	0	NA	NA	NA	NA	NA
LOC120285010	2.11015	1.80326	2.67502	0.674112	0.50024	NA
LOC120285012	576.728	-0.274011	0.59069	-0.463883	0.642732	0.758172
LOC120285016	8.13799	0.325746	1.17024	0.278357	0.780738	0.858374
LOC120285018	0	NA	NA	NA	NA	NA
LOC120285023	0	NA	NA	NA	NA	NA
LOC120285030	0	NA	NA	NA	NA	NA
LOC120285031	0	NA	NA	NA	NA	NA
LOC120285037	510.672	-0.770744	0.173181	-4.45051	8.56659e-06	6.67695e-05
LOC120285042	0	NA	NA	NA	NA	NA
LOC120285044	0	NA	NA	NA	NA	NA
LOC120285045	165.91	0.181385	0.273517	0.663156	0.507231	0.648808
LOC120285049	34.8653	-1.64937	0.609512	-2.70604	0.006809	0.0224751
LOC120285052	281.153	0.0245619	0.219724	0.111785	0.910994	0.943914
LOC120285054	0	NA	NA	NA	NA	NA
LOC120285057	4.45803	-2.54275	1.85588	-1.3701	0.170655	NA
LOC120285058	171.925	1.60698	0.296968	5.41129	6.25731e-08	7.34152e-07
LOC120285064	0.762496	-0.526054	4.09306	-0.128523	0.897735	NA
LOC120285066	0.149495	-0.604684	4.97921	-0.121442	0.903341	NA
LOC120285072	0.949264	-2.99624	3.65412	-0.819961	0.412238	NA
LOC120285087	0	NA	NA	NA	NA	NA
LOC120285090	0	NA	NA	NA	NA	NA
LOC120285096	0.481828	0.867353	4.97421	0.17437	0.861575	NA
LOC120285097	0	NA	NA	NA	NA	NA
LOC120285098	0	NA	NA	NA	NA	NA
LOC120285099	0	NA	NA	NA	NA	NA
LOC120285206	3.75584	-4.96448	2.58029	-1.924	0.0543544	NA
LOC120285207	250.438	0.12446	0.230342	0.540328	0.588971	0.717945
LOC120285212	5.15856	0.80178	1.5074	0.531896	0.594798	0.72325
LOC120285215	10.477	-1.89863	1.12912	-1.68151	0.0926639	0.185475
LOC120285216	15.4198	1.24534	0.918142	1.35637	0.174982	0.300247
LOC120285229	4.05422	-1.09671	1.7552	-0.624837	0.532078	NA
LOC120285231	19.0606	1.27151	0.78638	1.61691	0.105897	0.206253
LOC120285233	3289.39	0.218103	0.109129	1.99859	0.045653	0.105638
LOC120285236	0	NA	NA	NA	NA	NA
LOC120285238	99.7159	-0.505607	0.360452	-1.4027	0.160706	0.281946
LOC120285241	0.664666	3.21916	4.7171	0.682444	0.494958	NA
LOC120285245	0	NA	NA	NA	NA	NA
LOC120285246	0.149495	-0.604684	4.97921	-0.121442	0.903341	NA
LOC120285248	0.149495	-0.604684	4.97921	-0.121442	0.903341	NA
LOC120285249	46.2917	2.75135	2.81218	0.978368	0.327892	0.477155
LOC120285254	1.56533	-0.416337	2.79169	-0.149134	0.881448	NA
LOC120285256	4788.31	0.635646	0.120286	5.28444	1.26091e-07	1.39761e-06
LOC120285257	0	NA	NA	NA	NA	NA
LOC120285260	42.9806	0.290382	0.621948	0.466892	0.640577	0.757209
LOC120285261	42.9806	0.290382	0.621948	0.466892	0.640577	0.757209
LOC120285262	25.764	4.01734	0.81846	4.90842	9.18143e-07	8.71051e-06
LOC120285263	42.9806	0.290382	0.621948	0.466892	0.640577	0.757209
LOC120285264	42.9806	0.290382	0.621948	0.466892	0.640577	0.757209
LOC120285265	42.9806	0.290382	0.621948	0.466892	0.640577	0.757209
LOC120285266	12.1126	0.893979	1.02569	0.871588	0.383433	0.532929
LOC120285267	0	NA	NA	NA	NA	NA
LOC120285268	0	NA	NA	NA	NA	NA
LOC120285269	0	NA	NA	NA	NA	NA
LOC120285270	0	NA	NA	NA	NA	NA
LOC120285271	1.57005	4.46689	3.34515	1.33533	0.181767	NA
LOC120285273	0	NA	NA	NA	NA	NA
LOC120285274	2.68888	1.31841	2.15605	0.611492	0.540874	NA
LOC120285275	1.57005	4.46689	3.34515	1.33533	0.181767	NA
LOC120285276	0	NA	NA	NA	NA	NA
LOC120285277	1036.19	-0.142499	0.12904	-1.1043	0.269462	0.412182
LOC120285279	2466.46	0.423084	0.398887	1.06066	0.288844	0.435156
LOC120285280	3.98799	5.80488	2.49003	2.33125	0.0197403	NA
LOC120285281	0	NA	NA	NA	NA	NA
LOC120285282	0	NA	NA	NA	NA	NA
LOC120285283	0	NA	NA	NA	NA	NA
LOC120285285	0	NA	NA	NA	NA	NA
LOC120285286	0	NA	NA	NA	NA	NA
LOC120285287	5.18237	-1.52628	1.73141	-0.881525	0.378034	0.527752
LOC120285290	4.20386	0.242188	1.63691	0.147954	0.882379	NA
LOC120285294	1.89853	-3.99627	2.79483	-1.42988	0.152751	NA
LOC120285296	0	NA	NA	NA	NA	NA
LOC120285298	0	NA	NA	NA	NA	NA
LOC120285300	0.332333	2.21155	4.99252	0.442973	0.657785	NA
LOC120285303	0.399884	-1.7421	4.89227	-0.356093	0.721771	NA
LOC120285307	0.149495	-0.604684	4.97921	-0.121442	0.903341	NA
LOC120285309	0	NA	NA	NA	NA	NA
LOC120285311	1.226	0.0326235	3.30854	0.00986038	0.992133	NA
LOC120285312	0.250389	-0.982176	4.95834	-0.198086	0.842978	NA
LOC120285316	0	NA	NA	NA	NA	NA
LOC120285317	41.1803	0.999838	0.529962	1.88662	0.0592112	0.129988
LOC120285318	2.67848	-0.0241618	2.17076	-0.0111306	0.991119	NA
LOC120285319	482.643	1.67083	0.19039	8.77581	1.69679e-18	6.23784e-17
LOC120285320	59.0598	-0.374125	0.487707	-0.767111	0.443015	0.589374
LOC120285321	179.443	-0.40632	0.274778	-1.47872	0.139216	0.252977
LOC120285322	4.23028	-3.57931	2.10548	-1.7	0.0891316	NA
LOC120285323	1.76343	-0.740376	2.60607	-0.284097	0.776336	NA
LOC120285324	0	NA	NA	NA	NA	NA
LOC120285325	0	NA	NA	NA	NA	NA
LOC120285330	1.48338	-1.78738	2.98159	-0.599472	0.548858	NA
LOC120285334	0	NA	NA	NA	NA	NA
LOC120285335	21.4638	-1.81853	0.896294	-2.02894	0.0424645	0.0995654
LOC120285336	526.732	-0.0909287	0.164169	-0.553874	0.579665	0.710331
LOC120285338	1.69281	-0.736507	2.72168	-0.270608	0.786693	NA
LOC120285339	0	NA	NA	NA	NA	NA
LOC120285340	0	NA	NA	NA	NA	NA
LOC120285344	7.9675	0.365881	1.20154	0.30451	0.76074	0.845341
LOC120285345	14.9704	-0.325206	0.939739	-0.34606	0.729298	0.821496
LOC120285346	5.42979	6.25508	2.05319	3.04652	0.00231504	0.00900995
LOC120285350	10.6229	0.52492	1.3205	0.397516	0.690987	0.793515
LOC120285356	45.3395	-1.0627	0.521942	-2.03605	0.0417449	0.0984274
LOC120285358	3860.37	0.530982	0.0906206	5.8594	4.64537e-09	6.49542e-08
LOC120285359	0	NA	NA	NA	NA	NA
LOC120285365	19.7692	1.01997	0.765988	1.33157	0.183001	0.310389
LOC120285366	24.003	4.06778	0.912847	4.45614	8.34475e-06	6.53181e-05
LOC120285367	1.68951	0.293408	2.89039	0.101512	0.919144	NA
LOC120285368	0.597981	-2.35333	4.85554	-0.48467	0.627911	NA
LOC120285369	0.646343	3.18264	4.34916	0.731782	0.464302	NA
LOC120285370	2.88106	5.34045	2.4553	2.17507	0.0296252	NA
LOC120285371	3.23171	5.50461	2.35698	2.33546	0.0195196	NA
LOC120285372	9.66802	3.42427	1.33687	2.56142	0.0104246	0.0320587
LOC120285373	0.646343	3.18264	4.34916	0.731782	0.464302	NA
LOC120285374	1775.21	8.03257	0.267453	30.0336	3.5806e-198	7.89791e-195
LOC120285375	1042.59	2.71016	0.164053	16.52	2.63502e-61	8.61065e-59
LOC120285376	0.777516	1.798	4.06627	0.442175	0.658362	NA
LOC120285377	2392.38	-0.0342145	0.107415	-0.318525	0.750087	0.837527
LOC120285381	11.6101	4.06993	1.32003	3.08322	0.00204772	0.00810908
LOC120285382	0	NA	NA	NA	NA	NA
LOC120285383	361.742	-1.65237	0.610528	-2.70646	0.00680049	0.0224638
LOC120285385	3.70308	0.664659	1.71449	0.387672	0.698259	NA
LOC120285386	208.525	0.183396	0.247577	0.740765	0.458836	0.604226
LOC120285389	0	NA	NA	NA	NA	NA
LOC120285390	3.84141	5.75549	2.24711	2.56128	0.0104287	NA
LOC120285392	55.3264	0.633132	0.458678	1.38034	0.167482	0.290426
LOC120285393	52.6961	0.526798	0.472319	1.11534	0.264704	0.4061
LOC120285394	6.58887	-5.80109	1.94383	-2.98436	0.00284177	0.0107379
LOC120285395	224.228	7.40681	0.593016	12.4901	8.45678e-36	9.56592e-34
LOC120285396	234.981	6.827	0.499248	13.6746	1.44074e-42	2.44454e-40
LOC120285397	2.88106	5.34045	2.4553	2.17507	0.0296252	NA
LOC120285436	172.954	0.614752	0.277829	2.2127	0.0269183	0.0692445
LOC120285437	9.94984	-2.33217	1.27804	-1.8248	0.0680311	0.145512
LOC120285438	208.324	1.33712	0.26833	4.98313	6.25652e-07	6.11988e-06
LOC120285439	123.153	5.45056	0.53465	10.1946	2.09541e-24	1.23252e-22
LOC120285440	1.34915	-3.50184	3.17765	-1.10202	0.270452	NA
LOC120285441	6.62322	3.12302	1.57683	1.98057	0.0476393	0.109288
LOC120285442	0	NA	NA	NA	NA	NA
LOC120285443	54.4728	7.16671	1.11675	6.41745	1.38573e-10	2.33772e-09
LOC120285467	0	NA	NA	NA	NA	NA
LOC120285498	0	NA	NA	NA	NA	NA
LOC120285530	0	NA	NA	NA	NA	NA
LOC120285535	1189.34	0.469593	0.149625	3.13847	0.00169834	0.006976
LOC120285536	1189.34	0.469593	0.149625	3.13847	0.00169834	0.006976
LOC120285537	1189.34	0.469593	0.149625	3.13847	0.00169834	0.006976
LOC120285538	1786.96	0.672623	0.109671	6.13309	8.619e-10	1.32947e-08
LOC120285539	1786.96	0.672623	0.109671	6.13309	8.619e-10	1.32947e-08
LOC120285540	237.584	0.695522	0.272517	2.55221	0.0107041	0.0327327
LOC120285542	1591.98	0.1621	0.135638	1.1951	0.232049	0.369228
LOC120285543	1591.98	0.1621	0.135638	1.1951	0.232049	0.369228
LOC120285544	1591.98	0.1621	0.135638	1.1951	0.232049	0.369228
LOC120285545	1591.98	0.1621	0.135638	1.1951	0.232049	0.369228
LOC120285546	58.783	1.1517	4.5664	0.252211	0.800878	0.872579
LOC120285547	0	NA	NA	NA	NA	NA
LOC120285548	0	NA	NA	NA	NA	NA
LOC120285549	0	NA	NA	NA	NA	NA
LOC120285550	0	NA	NA	NA	NA	NA
LOC120285551	9.14867	-1.35246	1.19352	-1.13317	0.257143	0.39817
LOC120285552	9.14867	-1.35246	1.19352	-1.13317	0.257143	0.39817
LOC120285553	9.14867	-1.35246	1.19352	-1.13317	0.257143	0.39817
LOC120285554	9.14867	-1.35246	1.19352	-1.13317	0.257143	0.39817
LOC120285555	9.14867	-1.35246	1.19352	-1.13317	0.257143	0.39817
LOC120285556	9.14867	-1.35246	1.19352	-1.13317	0.257143	0.39817
LOC120285579	11.3426	-6.57375	1.74233	-3.77297	0.000161313	0.000896261
LOC120285585	569.465	-0.710899	0.166863	-4.26037	2.04093e-05	0.000144288
LOC120285586	0.31401	2.17029	4.99541	0.434457	0.663957	NA
LOC120285587	3.16896	0.610274	1.8397	0.331725	0.740097	NA
LOC120285588	3.79619	-1.49391	1.89418	-0.788682	0.430298	NA
LOC120285589	0	NA	NA	NA	NA	NA
LOC120285590	0.149495	-0.604684	4.97921	-0.121442	0.903341	NA
LOC120285591	0.149495	-0.604684	4.97921	-0.121442	0.903341	NA
LOC120285592	0	NA	NA	NA	NA	NA
LOC120285593	0	NA	NA	NA	NA	NA
LOC120285594	0	NA	NA	NA	NA	NA
LOC120285595	0	NA	NA	NA	NA	NA
LOC120285598	0.94203	3.73006	4.07736	0.914822	0.360285	NA
LOC120285602	0.650274	-2.43702	4.30458	-0.566146	0.571294	NA
LOC120285603	1.76405	-2.16128	2.75421	-0.784718	0.432619	NA
LOC120285604	0	NA	NA	NA	NA	NA
LOC120285605	0	NA	NA	NA	NA	NA
LOC120285606	0	NA	NA	NA	NA	NA
LOC120285607	0	NA	NA	NA	NA	NA
LOC120285608	0	NA	NA	NA	NA	NA
LOC120285609	0	NA	NA	NA	NA	NA
LOC120285610	0	NA	NA	NA	NA	NA
LOC120285611	0	NA	NA	NA	NA	NA
LOC120285612	0	NA	NA	NA	NA	NA
LOC120285613	0	NA	NA	NA	NA	NA
LOC120285614	6.25841	1.03714	1.32816	0.780884	0.434871	0.581673
LOC120285615	2.7314	-0.806957	2.29444	-0.351701	0.725063	NA
LOC120285618	13.4258	-0.387866	0.924991	-0.419319	0.674983	0.78093
LOC120285622	0	NA	NA	NA	NA	NA
LOC120285623	0	NA	NA	NA	NA	NA
LOC120285624	0	NA	NA	NA	NA	NA
LOC120285625	3.32333	5.54173	2.61819	2.11663	0.0342916	NA
LOC120285632	74.2245	-1.19514	0.417493	-2.86265	0.00420109	0.0150309
LOC120285638	4.87506	6.09683	2.09818	2.90577	0.0036635	0.0133677
LOC120285647	230.788	0.96349	0.243683	3.95387	7.68971e-05	0.000467905
LOC120285672	22.2333	4.18984	0.905019	4.62956	3.66436e-06	3.09384e-05
LOC120285675	0	NA	NA	NA	NA	NA
LOC120285676	113.158	5.16928	0.506439	10.2071	1.84267e-24	1.09113e-22
LOC120285677	2.27529	1.37188	2.19757	0.624268	0.532452	NA
LOC120285680	41.3992	6.07183	0.977691	6.21038	5.28579e-10	8.35779e-09
LOC120285681	99.9184	6.45059	0.683152	9.4424	3.64332e-21	1.63173e-19
LOC120285682	11.5451	2.43694	1.05687	2.30581	0.0211215	0.0569719
LOC120285683	1.45004	-3.59868	3.1028	-1.15982	0.246123	NA
LOC120285686	0.949264	-2.99624	3.65412	-0.819961	0.412238	NA
LOC120285687	29.2025	5.09373	0.975399	5.2222	1.76812e-07	1.90013e-06
LOC120285688	0	NA	NA	NA	NA	NA
LOC120285758	27.0989	1.45622	0.673681	2.16158	0.0306504	0.0767609
LOC120285759	149.785	-0.861834	0.406151	-2.12195	0.0338416	0.0830554
LOC120285760	1.24102	1.58114	3.31905	0.476383	0.633802	NA
LOC120285782	4.51095	-3.70324	2.07042	-1.78864	0.0736725	NA
LOC120285787	71.4775	2.22313	0.432856	5.13597	2.80699e-07	2.92398e-06
LOC120285790	30.0685	3.17232	0.710672	4.46383	8.05088e-06	6.31403e-05
LOC120285791	0	NA	NA	NA	NA	NA
LOC120285792	139.888	0.754556	0.419709	1.79781	0.0722074	0.152596
LOC120285793	15.7098	-0.385443	0.889661	-0.433247	0.664835	0.773145
LOC120285794	244.834	0.579673	0.282403	2.05264	0.0401075	0.0951514
LOC120285795	6.4878	0.853507	1.37494	0.620761	0.534757	0.672007
LOC120285796	18.5405	1.09046	0.785585	1.38809	0.165109	0.287555
LOC120285797	1567.55	-0.578833	0.403868	-1.43322	0.151794	0.270999
LOC120285798	1.0279	0.676801	3.31642	0.204076	0.838294	NA
LOC120285799	42.9806	0.290382	0.621948	0.466892	0.640577	0.757209
LOC120285800	42.9806	0.290382	0.621948	0.466892	0.640577	0.757209
LOC120285801	42.9806	0.290382	0.621948	0.466892	0.640577	0.757209
LOC120285802	42.9806	0.290382	0.621948	0.466892	0.640577	0.757209
LOC120285803	42.9806	0.290382	0.621948	0.466892	0.640577	0.757209
LOC120285804	831.507	0.72804	0.172683	4.21605	2.48614e-05	0.000171771
LOC120285805	0	NA	NA	NA	NA	NA
LOC120285806	0	NA	NA	NA	NA	NA
LOC120285807	831.507	0.72804	0.172683	4.21605	2.48614e-05	0.000171771
LOC120285808	16.0138	2.03158	4.58223	0.44336	0.657506	0.768164
LOC120285811	0.896972	-2.93725	4.1419	-0.709155	0.478228	NA
LOC120285812	0	NA	NA	NA	NA	NA
LOC120285813	1596.38	-0.0743998	0.34914	-0.213095	0.831253	0.894408
LOC120285816	0	NA	NA	NA	NA	NA
LOC120285817	0	NA	NA	NA	NA	NA
LOC120285818	0	NA	NA	NA	NA	NA
LOC120285820	0	NA	NA	NA	NA	NA
LOC120285823	1165.96	5.74045	0.619864	9.26083	2.02854e-20	8.81667e-19
LOC120285826	0.298991	-1.37233	4.92304	-0.278757	0.780432	NA
LOC123327013	58.794	0.0627389	0.494482	0.126878	0.899037	0.937948
LOC123327014	0.332333	2.21155	4.99252	0.442973	0.657785	NA
LOC123327015	131.966	-0.635368	0.304896	-2.08389	0.0371706	0.0895147
LOC123327016	0.250389	-0.982176	4.95834	-0.198086	0.842978	NA
LOC123327017	1.24102	1.58114	3.31905	0.476383	0.633802	NA
LOC123327018	468.715	-0.488865	0.177478	-2.75451	0.00587795	0.0199083
LOC123327019	3736.9	0.0747067	0.0942865	0.792337	0.428164	0.57604
LOC123327020	466.813	0.316213	0.179933	1.7574	0.0788505	0.163271
LOC123327021	192.546	-0.159372	0.325095	-0.490232	0.62397	0.745872
LOC123327022	47.2534	-0.320832	0.515647	-0.622193	0.533815	0.671313
LOC123327023	0	NA	NA	NA	NA	NA
LOC123327024	49.9519	-1.8869	4.57017	-0.412874	0.679699	0.785357
LOC123327025	1836.27	0.616242	0.123253	4.99982	5.7385e-07	5.6761e-06
LOC123327026	0.646343	3.18264	4.34916	0.731782	0.464302	NA
LOC123327027	0	NA	NA	NA	NA	NA
LOC123327028	2.38814	1.01517	2.14041	0.474285	0.635297	NA
LOC123327029	0	NA	NA	NA	NA	NA
LOC123327030	0	NA	NA	NA	NA	NA
LOC123327031	0	NA	NA	NA	NA	NA
LOC123327032	11145.2	-0.041736	0.0885811	-0.471161	0.637525	0.755932
LOC123327033	0	NA	NA	NA	NA	NA
LOC123327034	94.2118	1.59179	0.396751	4.01206	6.01916e-05	0.000377986
LOC123327035	318.321	0.47667	0.204082	2.33568	0.0195078	0.0533355
LOC123327036	1738.41	-0.141872	0.112006	-1.26665	0.20528	0.337279
LOC123327037	31.2925	-1.46885	2.48746	-0.590503	0.554854	0.689309
LOC123327038	0	NA	NA	NA	NA	NA
LOC123327044	0	NA	NA	NA	NA	NA
LOC123327046	1.57972	2.5899	3.12067	0.829916	0.406586	NA
LOC123327051	4.04658	-1.61611	1.85294	-0.872189	0.383105	NA
LOC123327055	0	NA	NA	NA	NA	NA
LOC123327059	78.8279	2.07488	2.76622	0.750077	0.453208	0.59887
LOC123327061	2.56382	-2.79655	2.43661	-1.14772	0.251084	NA
LOC123327062	1.03121	-1.10477	3.35168	-0.329617	0.741689	NA
LOC123327063	2.88499	1.84406	2.01412	0.915563	0.359896	NA
LOC123327064	14.1306	0.0567823	0.928024	0.0611862	0.951211	0.970048
LOC123327065	1.61456	-1.99849	2.8561	-0.699727	0.484098	NA
LOC123327066	1.59168	2.00369	2.74949	0.728748	0.466156	NA
LOC123327068	2.70153	2.21676	2.18064	1.01656	0.309361	NA
LOC123327069	70.8037	0.460561	0.412148	1.11747	0.263795	0.405341
LOC123327070	8.90497	1.34477	1.14459	1.1749	0.240035	0.378657
LOC123327073	78.4428	2.25181	0.495994	4.53999	5.62562e-06	4.57043e-05
LOC123327076	353.454	4.69621	0.307535	15.2705	1.20314e-52	3.03294e-50
LOC123327078	51.1139	1.69537	0.526788	3.21832	0.00128946	0.00551207
LOC123327082	94.1789	3.4455	0.441163	7.81004	5.71676e-15	1.56158e-13
LOC123327084	1.14649	2.44955	3.49946	0.699978	0.483941	NA
LOC123327086	2.34284	0.328666	2.12181	0.154899	0.876901	NA
LOC123327088	3.87334	1.78303	1.85404	0.961699	0.336201	NA
LOC123327089	0	NA	NA	NA	NA	NA
LOC123327090	28.8103	-0.120835	0.667633	-0.180991	0.856375	0.911875
LOC123327091	84.8629	4.08337	0.517866	7.88499	3.14556e-15	8.86685e-14
LOC123327096	64.8539	0.0194154	0.423744	0.0458188	0.963455	0.977415
LOC123327101	1.99156	0.864356	2.28454	0.378349	0.705171	NA
LOC123327103	72.5345	9.99204	1.50439	6.64192	3.0962e-11	5.67937e-10
LOC123327105	0	NA	NA	NA	NA	NA
LOC123327107	0	NA	NA	NA	NA	NA
LOC123327108	0.149495	-0.604684	4.97921	-0.121442	0.903341	NA
LOC123327115	0.500778	-2.04744	4.87204	-0.420242	0.674308	NA
LOC123327118	1.01289	-1.13581	3.37302	-0.336735	0.736317	NA
LOC123327121	4.87663	-1.99416	1.62542	-1.22686	0.219876	0.354591
LOC123327126	3.46771	1.57891	1.84302	0.8567	0.391611	NA
LOC123327127	128.731	4.62485	0.409143	11.3037	1.25734e-29	9.81723e-28
LOC123327128	61.01	5.52689	0.704004	7.85065	4.13874e-15	1.1483e-13
LOC123327131	0.945334	1.03424	3.42408	0.302049	0.762615	NA
LOC123327139	40.4191	-1.36218	0.564468	-2.41322	0.0158124	0.0449027
LOC123327145	15.5342	-0.858529	0.893454	-0.96091	0.336597	0.486164
LOC123327153	1.07651	0.439678	3.49338	0.12586	0.899842	NA
LOC123327154	0	NA	NA	NA	NA	NA
LOC123327156	0.31401	2.17029	4.99541	0.434457	0.663957	NA
LOC123327157	4.60005	-0.0662027	1.5354	-0.0431174	0.965608	0.97881
LOC123327158	9.0646	-0.381715	1.15235	-0.331249	0.740456	0.830226
LOC123327159	3.06476	1.35515	1.96143	0.690897	0.489631	NA
LOC123327160	1.06455	0.743318	3.27447	0.227004	0.82042	NA
LOC123327162	8.91857	0.701347	1.11998	0.626212	0.531176	0.668936
LOC123327163	42.6902	2.37865	0.555658	4.28078	1.86243e-05	0.000133162
LOC123327165	7.395	2.29775	1.32439	1.73494	0.0827508	0.169203
LOC123327167	0	NA	NA	NA	NA	NA
LOC123327168	0.149495	-0.604684	4.97921	-0.121442	0.903341	NA
LOC123327172	1.96994	2.00524	2.603	0.770358	0.441088	NA
LOC123327173	0	NA	NA	NA	NA	NA
LOC123327175	1.97654	-0.0602996	2.32095	-0.0259806	0.979273	NA
LOC123327176	5.92223	-1.00585	1.44491	-0.696137	0.486343	0.629088
LOC123327177	1.74448	0.360852	2.85714	0.126298	0.899496	NA
LOC123327181	3.06397	-1.85886	2.10733	-0.882094	0.377726	NA
LOC123327189	0	NA	NA	NA	NA	NA
LOC123327191	23.2233	-0.467478	0.712144	-0.656437	0.511543	0.652689
LOC123327193	0	NA	NA	NA	NA	NA
LOC123327194	0	NA	NA	NA	NA	NA
LOC123327196	46.0002	0.336887	0.513006	0.656693	0.511378	0.652573
LOC123327197	98.4106	1.4769	0.375393	3.93428	8.34462e-05	0.000499827
LOC123327199	71.1222	0.839012	0.418303	2.00575	0.0448828	0.104047
LOC123327200	133.079	-2.33839	0.368417	-6.34714	2.1935e-10	3.59725e-09
LOC123327201	6.95799	-2.11055	1.39597	-1.51189	0.130561	0.241144
LOC123327202	29.4713	0.464655	0.621843	0.747223	0.454929	0.600572
LOC123327206	3.67304	-0.337395	1.71638	-0.196574	0.844161	NA
LOC123327207	17.9708	0.909807	0.814473	1.11705	0.263973	0.405402
LOC123327216	9.21827	-1.33255	1.1732	-1.13583	0.256028	0.397002
LOC123327229	7.13596	2.23185	1.33679	1.66957	0.095005	0.189174
LOC123327230	0.833111	-0.564395	3.98787	-0.141528	0.887453	NA
LOC123327232	5.43403	-1.27146	1.49936	-0.848004	0.396436	0.545076
LOC123327240	3.77418	-1.53106	1.78711	-0.856725	0.391597	NA
LOC123327254	0	NA	NA	NA	NA	NA
LOC123327255	0	NA	NA	NA	NA	NA
LOC123327262	0.31401	2.17029	4.99541	0.434457	0.663957	NA
LOC123327267	25.4914	0.103704	0.680899	0.152304	0.878947	0.926843
LOC123327268	3.11313	3.78626	2.29981	1.64634	0.0996945	NA
LOC123327273	0	NA	NA	NA	NA	NA
LOC123327274	127.557	7.41431	0.804714	9.2136	3.15375e-20	1.34423e-18
LOC123327289	0	NA	NA	NA	NA	NA
LOC123327290	671.296	-1.78801	0.164736	-10.8538	1.9134e-27	1.30868e-25
LOC123327301	0	NA	NA	NA	NA	NA
LOC123327303	1.06455	0.743318	3.27447	0.227004	0.82042	NA
LOC123327304	0.31401	2.17029	4.99541	0.434457	0.663957	NA
LOC123327306	0	NA	NA	NA	NA	NA
LOC123327309	15.1007	-0.304354	0.86775	-0.350739	0.725784	0.818867
LOC123327312	0	NA	NA	NA	NA	NA
LOC123327313	0	NA	NA	NA	NA	NA
LOC123327316	4.4872	0.0499421	1.57334	0.0317427	0.974677	NA
LOC123327328	7.30896	0.734862	1.34728	0.545442	0.58545	0.714641
LOC123327332	207.889	4.62314	0.327175	14.1305	2.46438e-45	4.52983e-43
LOC123327333	1.0835	-1.15829	3.60895	-0.320948	0.74825	NA
LOC123327334	71.1222	0.839012	0.418303	2.00575	0.0448828	0.104047
LOC123327337	3.48958	-0.197328	1.82024	-0.108408	0.913672	NA
LOC123327338	0	NA	NA	NA	NA	NA
LOC123327339	177.559	2.72525	0.318743	8.54999	1.23097e-17	4.14536e-16
LOC123327340	23.7299	-0.710907	0.707017	-1.0055	0.314655	0.463086
LOC123327341	0.332333	2.21155	4.99252	0.442973	0.657785	NA
LOC123327342	3.5911	-0.826287	1.75297	-0.471365	0.63738	NA
LOC123327343	1.94713	-4.04027	2.77559	-1.45565	0.145491	NA
LOC123327344	596.452	-0.522539	0.158606	-3.29458	0.000985692	0.00438566
LOC123327345	11.7855	0.585878	0.976129	0.600206	0.548369	0.683756
LOC123327347	0.582722	0.500796	4.63248	0.108105	0.913912	NA
LOC123327354	0	NA	NA	NA	NA	NA
LOC123327356	7.93809	-0.337519	1.24234	-0.27168	0.785868	0.861545
LOC123327359	0	NA	NA	NA	NA	NA
LOC123327361	547.321	-0.907426	0.165544	-5.48147	4.21802e-08	5.13319e-07
LOC123327362	1.26327	-1.56258	3.0904	-0.505625	0.61312	NA
LOC123327363	1.94359	-0.0386751	2.77868	-0.0139185	0.988895	NA
LOC123327365	295.84	0.183718	0.219482	0.837054	0.402562	0.55118
LOC123327367	13.7045	0.696714	0.920215	0.757121	0.448978	0.594973
LOC123327370	331.329	-0.1206	0.220491	-0.546962	0.584405	0.713688
LOC123327378	0.250389	-0.982176	4.95834	-0.198086	0.842978	NA
LOC123327380	0	NA	NA	NA	NA	NA
LOC123327392	1.36417	-1.69344	3.0201	-0.560724	0.574985	NA
LOC123327396	4.96117	1.81418	1.67969	1.08007	0.280113	0.424938
LOC123327397	1.32933	4.21938	3.5646	1.18369	0.236535	NA
LOC123327398	137.131	1.37858	0.323949	4.25554	2.08545e-05	0.000147199
LOC123327399	27.1768	-7.83559	2.76546	-2.83338	0.00460586	0.0162549
LOC123327400	0.996998	3.80425	3.98899	0.953686	0.340242	NA
LOC123327401	0.149495	-0.604684	4.97921	-0.121442	0.903341	NA
LOC123327402	2.6497	-4.47009	2.50014	-1.78794	0.073786	NA
LOC123327405	20.2858	0.705296	0.74786	0.943085	0.345637	0.496024
LOC123327406	0	NA	NA	NA	NA	NA
LOC123327407	82.9978	0.300745	0.380216	0.790984	0.428954	0.576649
LOC123327408	15.6859	-0.0194224	0.853163	-0.0227651	0.981838	0.98857
LOC123327409	27.1917	0.572198	0.70436	0.812366	0.416582	0.563987
LOC123327412	3.84062	0.599976	1.74122	0.344572	0.730416	NA
LOC123327413	2.66881	0.517012	2.18342	0.23679	0.81282	NA
LOC123327414	2.05518	1.7467	2.43913	0.716116	0.47392	NA
LOC123327416	246.342	0.0320681	0.229523	0.139716	0.888884	0.932869
LOC123327417	9.09827	2.81649	1.30194	2.16331	0.0305172	0.076518
LOC123327418	0	NA	NA	NA	NA	NA
LOC123327419	0	NA	NA	NA	NA	NA
LOC123327420	0	NA	NA	NA	NA	NA
LOC123327422	2.50343	3.42384	2.43248	1.40755	0.159264	NA
LOC123327423	415.773	4.17681	0.235643	17.7252	2.67947e-70	1.47756e-67
LOC123327425	91.735	-0.143186	0.368411	-0.388659	0.697528	0.798222
LOC123327426	7.36583	0.619954	1.24743	0.496986	0.619199	0.742382
LOC123327427	4.0285	-3.50883	2.13036	-1.64706	0.0995464	NA
LOC123327428	1.24739	2.15412	3.39833	0.633875	0.526162	NA
LOC123327432	1.88406	4.72986	3.13331	1.50954	0.13116	NA
LOC123327434	1.39775	-3.5635	3.14274	-1.13388	0.256844	NA
LOC123327435	6.28853	-0.798276	1.37266	-0.581554	0.560867	0.694141
LOC123327436	20.4749	0.388731	0.801063	0.485268	0.627486	0.748666
LOC123327437	25.2135	0.499234	0.70127	0.711899	0.476527	0.620157
LOC123327441	85.845	0.0465851	0.376203	0.12383	0.90145	0.938775
LOC123327442	14.6064	0.200922	0.908051	0.221267	0.824884	0.889725
LOC123327443	45.0281	6.27293	0.96879	6.47502	9.48018e-11	1.63048e-09
LOC123327444	0.332333	2.21155	4.99252	0.442973	0.657785	NA
LOC123327445	0.399884	-1.7421	4.89227	-0.356093	0.721771	NA
LOC123327446	2.80635	0.44054	1.94061	0.227011	0.820415	NA
LOC123327447	9.40968	0.668866	1.10117	0.607412	0.543577	0.679606
LOC123327448	71.1222	0.839012	0.418303	2.00575	0.0448828	0.104047
LOC123327449	2.76105	-0.129006	1.99751	-0.0645833	0.948506	NA
LOC123327450	0.799769	-2.74356	3.92572	-0.698869	0.484634	NA
LOC123327451	0.149495	-0.604684	4.97921	-0.121442	0.903341	NA
LOC123327452	0	NA	NA	NA	NA	NA
LOC123327454	229.762	2.09144	0.268479	7.78994	6.70416e-15	1.80338e-13
LOC123327455	0.31401	2.17029	4.99541	0.434457	0.663957	NA
LOC123327457	14.1254	7.63035	1.74413	4.37488	1.21498e-05	9.13094e-05
LOC123327458	3.42596	-0.67884	1.96223	-0.345953	0.729378	NA
LOC123327459	11.3854	-0.25056	0.998869	-0.250843	0.801935	0.873623
LOC123327460	0	NA	NA	NA	NA	NA
LOC123327461	0	NA	NA	NA	NA	NA
LOC123327462	0	NA	NA	NA	NA	NA
LOC123327463	20.8128	2.13389	0.787835	2.70855	0.00675773	0.0223476
LOC123327464	0	NA	NA	NA	NA	NA
LOC123327465	0	NA	NA	NA	NA	NA
LOC123327466	3.55855	1.21169	2.17293	0.557627	0.577099	NA
LOC123327467	0.149495	-0.604684	4.97921	-0.121442	0.903341	NA
LOC123327468	20.3583	-0.884801	0.786555	-1.12491	0.260628	0.402226
LOC123327469	479.246	2.28557	0.894052	2.55641	0.0105757	0.0323991
LOC123327470	8.60999	-0.740606	1.15469	-0.641389	0.52127	0.660894
LOC123327473	4.20858	1.6331	1.74819	0.93417	0.350216	NA
LOC123327477	35.4248	-3.03111	0.680308	-4.45551	8.36957e-06	6.54072e-05
LOC123327479	28.3852	-1.56866	0.679291	-2.30926	0.0209293	0.0565399
LOC123327480	0.149495	-0.604684	4.97921	-0.121442	0.903341	NA
LOC123327481	205.057	-0.588777	0.253494	-2.32264	0.0201984	0.0549252
LOC123327483	0.814788	-0.601404	4.02136	-0.149552	0.881118	NA
LOC123327485	0.896251	-0.795279	3.84078	-0.207062	0.835961	NA
LOC27206138	0.332333	2.21155	4.99252	0.442973	0.657785	NA
LOC27206139	0	NA	NA	NA	NA	NA
LOC27206140	449.947	0.276895	0.174527	1.58655	0.112615	0.215766
LOC27206141	0.930314	-0.901933	3.78526	-0.238275	0.811668	NA
LOC27206142	10588.7	0.152089	0.0885967	1.71664	0.0860448	0.174483
LOC27206144	119.659	0.698347	0.316688	2.20516	0.027443	0.0703251
LOC27206145	0	NA	NA	NA	NA	NA
LOC27206146	96.0703	-1.3978	0.365376	-3.82564	0.00013043	0.000742921
LOC27206147	483.575	-0.238614	0.184464	-1.29355	0.19582	0.325249
LOC27206148	0.332333	2.21155	4.99252	0.442973	0.657785	NA
LOC27206149	0	NA	NA	NA	NA	NA
LOC27206150	13.4957	0.864355	0.928319	0.931097	0.351803	0.501448
LOC27206151	0.650274	-2.43702	4.30458	-0.566146	0.571294	NA
LOC27206152	2.41064	-2.71567	2.48174	-1.09426	0.27384	NA
LOC27206155	1845	-0.328029	0.120526	-2.72163	0.006496	0.0215954
LOC27206156	0	NA	NA	NA	NA	NA
LOC27206158	108.232	-0.240194	3.09945	-0.0774958	0.938229	0.961225
LOC27206159	222.547	-0.141057	0.242282	-0.582202	0.560431	0.693796
LOC27206160	2.64246	-0.82165	2.20354	-0.372877	0.70924	NA
LOC27206161	158558	-0.256789	0.101295	-2.53506	0.0112427	0.0340408
LOC27206162	148.554	-0.501114	0.299419	-1.67362	0.0942045	0.188047
LOC27206163	1.32933	4.21938	3.5646	1.18369	0.236535	NA
LOC27206164	0	NA	NA	NA	NA	NA
LOC27206165	1094.34	0.563543	0.125794	4.47987	7.46877e-06	5.89946e-05
LOC27206166	0	NA	NA	NA	NA	NA
LOC27206167	4.01646	1.39961	1.65732	0.844501	0.398389	NA
LOC27206168	5.75433	1.83142	1.42045	1.28933	0.197284	0.327003
LOC27206169	102.306	-0.321377	0.401107	-0.801224	0.423002	0.571014
LOC27206170	2.04323	2.06579	2.38929	0.864604	0.387256	NA
LOC27206171	2.80635	0.44054	1.94061	0.227011	0.820415	NA
LOC27206172	10.7414	4.75925	1.41328	3.36752	0.000758477	0.00349089
LOC27206173	216.518	-0.235576	0.254088	-0.927145	0.353851	0.503148
LOC27206174	0	NA	NA	NA	NA	NA
LOC27206175	1724.43	-0.404759	0.127054	-3.18573	0.00144391	0.00606361
LOC27206176	5445.01	0.443298	0.0889526	4.98354	6.24328e-07	6.11371e-06
LOC27206177	2337.81	-0.160961	0.102417	-1.57162	0.116038	0.2206
LOC27206178	56.3465	0.0128755	0.466275	0.0276135	0.97797	0.986308
LOC27206179	0	NA	NA	NA	NA	NA
LOC27206180	7.97717	0.183733	1.18938	0.154478	0.877233	0.925927
LOC27206181	4468.31	0.109131	0.0973804	1.12066	0.262431	0.404442
LOC27206182	784.792	0.536366	0.141911	3.7796	0.000157081	0.000875503
LOC27206184	246.027	-0.848	0.246107	-3.44565	0.000569678	0.00271787
LOC27206185	0.62802	3.14517	4.82894	0.651318	0.514841	NA
LOC27206187	1783.22	0.307644	0.109153	2.81845	0.00482556	0.0169086
LOC27206188	1.54725	-3.71186	3.02851	-1.22564	0.220335	NA
LOC27206189	3063.2	-0.33063	0.10318	-3.2044	0.00135346	0.00574665
LOC27206190	0.31401	2.17029	4.99541	0.434457	0.663957	NA
LOC27206191	101.832	-1.04906	0.352287	-2.97786	0.00290266	0.0109445
LOC27206192	0.332333	2.21155	4.99252	0.442973	0.657785	NA
LOC27206193	0	NA	NA	NA	NA	NA
LOC27206194	0.332333	2.21155	4.99252	0.442973	0.657785	NA
LOC27206195	0	NA	NA	NA	NA	NA
LOC27206196	209.467	-0.479594	0.261079	-1.83697	0.0662146	0.142278
LOC27206197	2.17857	-2.51597	2.57747	-0.97614	0.328995	NA
LOC27206198	5.5017	-2.20107	1.57531	-1.39723	0.162343	0.2836
LOC27206199	2076.22	0.206291	0.107389	1.92097	0.0547353	0.122199
LOC27206200	23.4825	-3.07146	0.834926	-3.67872	0.000234405	0.00125191
LOC27206201	0.500778	-2.04744	4.87204	-0.420242	0.674308	NA
LOC27206202	763.654	-2.89721	0.164385	-17.6245	1.59687e-69	8.28776e-67
LOC27206203	0	NA	NA	NA	NA	NA
LOC27206204	135.632	-2.23588	0.35384	-6.31891	2.63423e-10	4.24895e-09
LOC27206205	264.365	0.3736	0.237011	1.5763	0.114957	0.219112
LOC27206206	0	NA	NA	NA	NA	NA
LOC27206207	0	NA	NA	NA	NA	NA
LOC27206208	24.9169	-0.12392	0.676522	-0.183172	0.854663	0.910712
LOC27206209	0	NA	NA	NA	NA	NA
LOC27206210	386.404	0.850483	0.201663	4.21736	2.47182e-05	0.000171184
LOC27206211	5.00426	-0.672242	1.59859	-0.420521	0.674105	0.780325
LOC27206212	0	NA	NA	NA	NA	NA
LOC27206215	0	NA	NA	NA	NA	NA
LOC27206216	2282.66	0.142003	0.108166	1.31282	0.189242	0.317733
LOC27206217	0	NA	NA	NA	NA	NA
LOC27206218	14.5282	0.447451	0.877352	0.510002	0.61005	0.736315
LOC27206219	0	NA	NA	NA	NA	NA
LOC27206220	9.81837	1.00739	1.10646	0.910467	0.362576	0.512296
LOC27206221	0	NA	NA	NA	NA	NA
LOC27206222	0	NA	NA	NA	NA	NA
LOC27206223	0	NA	NA	NA	NA	NA
LOC27206224	0	NA	NA	NA	NA	NA
LOC27206225	35.6374	-0.111776	0.569455	-0.196286	0.844386	0.902986
LOC27206226	0.149495	-0.604684	4.97921	-0.121442	0.903341	NA
LOC27206227	0	NA	NA	NA	NA	NA
LOC27206228	0	NA	NA	NA	NA	NA
LOC27206229	1.56164	-0.479301	3.00942	-0.159267	0.873459	NA
LOC27206230	359.712	0.568298	0.19337	2.93891	0.00329366	0.0122203
LOC27206231	0.664666	3.21916	4.7171	0.682444	0.494958	NA
LOC27206232	9.13987	1.71931	1.14654	1.49956	0.133727	0.245609
LOC27206234	0	NA	NA	NA	NA	NA
LOC27206235	0.978676	3.77964	3.66754	1.03057	0.302744	NA
LOC27206236	0.448486	-1.94496	4.87837	-0.39869	0.690122	NA
LOC27206237	131.786	1.52032	0.365966	4.15428	3.2632e-05	0.000218752
LOC27206239	1141.45	0.226165	0.126393	1.78938	0.0735532	0.15492
LOC27206240	1.25033	-1.98674	3.10973	-0.638879	0.522902	NA
LOC27206241	2.98636	-1.1328	2.16009	-0.524424	0.599984	NA
LOC27206242	846.029	-0.375358	0.147024	-2.55303	0.010679	0.0326703
LOC27206243	1718.73	0.0609959	0.128547	0.474501	0.635143	0.75422
LOC27206244	2719.65	-0.122986	0.0974667	-1.26183	0.20701	0.339237
LOC27206245	0	NA	NA	NA	NA	NA
LOC27206246	0	NA	NA	NA	NA	NA
LOC27206247	76.2731	-1.18071	0.412935	-2.85932	0.00424555	0.0151654
LOC27206248	0	NA	NA	NA	NA	NA
LOC27206249	0	NA	NA	NA	NA	NA
LOC27206250	0.31401	2.17029	4.99541	0.434457	0.663957	NA
LOC27206251	0	NA	NA	NA	NA	NA
LOC27206252	288.184	-0.114435	0.217871	-0.525239	0.599417	0.727363
LOC27206253	1052.59	0.00517597	0.127586	0.0405684	0.96764	0.979969
LOC27206254	542.937	0.367401	0.161634	2.27304	0.0230237	0.0611493
LOC27206255	1.80872	0.156136	2.40003	0.0650558	0.94813	NA
LOC27206256	0.31401	2.17029	4.99541	0.434457	0.663957	NA
LOC27206257	0.399884	-1.7421	4.89227	-0.356093	0.721771	NA
LOC27206259	221.625	0.0231311	0.25018	0.0924577	0.926334	0.953732
LOC27206260	1.61063	0.60592	2.54593	0.237995	0.811885	NA
LOC27206261	883.907	-0.128752	0.134805	-0.955104	0.339525	0.489562
LOC27206262	0.250389	-0.982176	4.95834	-0.198086	0.842978	NA
LOC27206263	2906.95	0.136704	0.096053	1.42321	0.154674	0.274771
LOC27206264	0.698875	-2.56367	4.15942	-0.616352	0.537662	NA
LOC27206265	2233.04	0.00282566	0.112827	0.0250442	0.98002	0.987293
LOC27206266	5.531	-0.560592	1.43462	-0.390759	0.695975	0.797376
LOC27206268	0	NA	NA	NA	NA	NA
LOC27206269	7.27617	-4.4201	1.85867	-2.3781	0.0174022	0.0485734
LOC27206270	472.429	-0.246866	0.174383	-1.41565	0.156877	0.277336
LOC27206271	1240.93	-0.0672947	0.123919	-0.543053	0.587093	0.716052
LOC27206272	0	NA	NA	NA	NA	NA
LOC27206273	3746.83	0.0422786	0.091738	0.460862	0.644898	0.75937
LOC27206274	0.250389	-0.982176	4.95834	-0.198086	0.842978	NA
LOC27206275	813.149	0.557491	0.139299	4.00212	6.27776e-05	0.000393106
LOC27206276	1069	0.38043	0.130234	2.92112	0.00348775	0.0128272
LOC27206277	1671.31	-0.364499	0.111118	-3.2803	0.00103695	0.00456538
LOC27206278	2.44067	-0.659198	2.25135	-0.292801	0.769674	NA
LOC27206279	0	NA	NA	NA	NA	NA
LOC27206280	0.149495	-0.604684	4.97921	-0.121442	0.903341	NA
LOC27206281	0.149495	-0.604684	4.97921	-0.121442	0.903341	NA
LOC27206282	911.911	0.0887923	0.134806	0.658666	0.510111	0.651521
LOC27206283	276.914	-0.0138764	0.218423	-0.0635299	0.949345	0.969004
LOC27206284	4.41242	2.02322	1.6384	1.23487	0.216877	NA
LOC27206285	2.02514	-0.146479	2.48982	-0.0588311	0.953087	NA
LOC27206286	0	NA	NA	NA	NA	NA
LOC27206287	32.1998	-1.49704	0.698323	-2.14376	0.0320523	0.0794598
LOC27206288	0.500778	-2.04744	4.87204	-0.420242	0.674308	NA
LOC27206289	0.399884	-1.7421	4.89227	-0.356093	0.721771	NA
LOC27206290	0.613001	0.0504208	4.48317	0.0112467	0.991027	NA
LOC27206291	1543.01	-0.0148577	0.112919	-0.131579	0.895318	0.936223
LOC27206292	0	NA	NA	NA	NA	NA
LOC27206293	0.54938	-2.21118	4.60119	-0.480568	0.630824	NA
LOC27206294	0	NA	NA	NA	NA	NA
LOC27206295	234.197	-0.596579	0.236216	-2.52557	0.0115512	0.0348076
LOC27206296	0	NA	NA	NA	NA	NA
LOC27206297	1.07651	0.439678	3.49338	0.12586	0.899842	NA
LOC27206298	0	NA	NA	NA	NA	NA
LOC27206299	406.051	-1.68631	0.191832	-8.79051	1.4888e-18	5.5192e-17
LOC27206300	2631.17	0.39827	0.104368	3.81601	0.000135625	0.000767062
LOC27206301	0.149495	-0.604684	4.97921	-0.121442	0.903341	NA
LOC27206302	2.35071	-4.29301	2.6183	-1.63962	0.101085	NA
LOC27206303	0.250389	-0.982176	4.95834	-0.198086	0.842978	NA
LOC27206304	142.148	-1.48882	0.319141	-4.66509	3.08483e-06	2.62717e-05
LOC27206305	11.6206	-0.128984	1.00648	-0.128155	0.898027	0.937556
LOC27206306	0.500778	-2.04744	4.87204	-0.420242	0.674308	NA
LOC27206308	0.332333	2.21155	4.99252	0.442973	0.657785	NA
LOC27206309	784.634	0.391396	0.141096	2.77397	0.00553766	0.0189522
LOC27206310	1.07651	0.439678	3.49338	0.12586	0.899842	NA
LOC27206311	47.0846	0.0130348	0.499385	0.0261016	0.979176	0.986725
LOC27206313	31.1817	0.111091	0.607202	0.182955	0.854833	0.910783
LOC27206314	43.7055	1.05624	0.527485	2.0024	0.0452415	0.104741
LOC27206315	2.53354	-2.73598	2.47373	-1.10602	0.26872	NA
LOC27206316	12.6357	-6.7347	1.71368	-3.92996	8.49593e-05	0.000507857
LOC27206318	0	NA	NA	NA	NA	NA
LOC27206319	0	NA	NA	NA	NA	NA
LOC27206320	0	NA	NA	NA	NA	NA
LOC27206321	3.33331	-3.18909	2.27192	-1.4037	0.160408	NA
LOC27206322	107.411	-1.28887	0.364398	-3.53698	0.000404733	0.00202321
LOC27206323	909.555	0.450298	0.148623	3.02981	0.00244711	0.00947799
LOC27206324	0.500778	-2.04744	4.87204	-0.420242	0.674308	NA
LOC27206325	178.348	0.996216	0.271089	3.67486	0.000237978	0.00126792
LOC27206326	102.47	-0.150596	0.344676	-0.436922	0.662168	0.771567
LOC27206327	305.716	-1.64593	0.295824	-5.56388	2.63837e-08	3.33501e-07
LOC27206328	0	NA	NA	NA	NA	NA
LOC27206330	273.675	-0.516867	0.236722	-2.18343	0.0290041	0.0735143
LOC27206331	42448.1	0.0636573	0.0856226	0.743464	0.457201	0.602579
LOC27206332	2.32845	-1.40532	2.35553	-0.596606	0.550771	NA
LOC27206333	0	NA	NA	NA	NA	NA
LOC27206334	1741.1	-0.43134	0.12071	-3.57334	0.000352452	0.00179543
LOC27206335	20.1638	2.73807	0.848133	3.22835	0.00124507	0.00534043
LOC27206336	0	NA	NA	NA	NA	NA
LOC27206337	0	NA	NA	NA	NA	NA
LOC27206338	44.0839	-3.2556	0.641814	-5.0725	3.92616e-07	4.00005e-06
LOC27206339	399.93	-0.290076	0.189086	-1.5341	0.125006	0.233275
LOC27206340	10.8713	-0.0134493	1.04876	-0.0128239	0.989768	0.993833
LOC27206341	2202.92	-0.165464	0.126508	-1.30794	0.190894	0.319776
LOC27206342	0	NA	NA	NA	NA	NA
LOC27206343	1354.87	0.0577107	0.117191	0.492451	0.622401	0.744715
LOC27206344	13.693	-0.303192	0.925378	-0.327641	0.743183	0.832754
LOC27206345	1888.38	-0.122945	0.111721	-1.10047	0.271129	0.41387
LOC27206346	0	NA	NA	NA	NA	NA
LOC27206347	0.500778	-2.04744	4.87204	-0.420242	0.674308	NA
LOC27206348	14.2696	-0.508187	0.928377	-0.547392	0.584109	0.713498
LOC27206349	6.07408	2.56574	1.4719	1.74315	0.0813082	0.166794
LOC27206350	7.65349	0.260337	1.21875	0.21361	0.830851	0.894316
LOC27206351	0.250389	-0.982176	4.95834	-0.198086	0.842978	NA
LOC27206352	0	NA	NA	NA	NA	NA
LOC27206353	1303.86	0.0614649	0.160538	0.382868	0.701818	0.801467
LOC27206354	15.4295	0.129511	0.862469	0.150164	0.880636	0.928075
LOC27206355	2.0249	2.05291	2.35863	0.870382	0.384092	NA
LOC27206356	2.17896	-1.26753	2.43741	-0.520033	0.60304	NA
LOC27206358	582.947	0.0917757	0.158096	0.580506	0.561574	0.694626
LOC27206359	5010.96	0.0787344	0.0883729	0.890933	0.372965	0.522993
LOC27206360	1.0279	0.676801	3.31642	0.204076	0.838294	NA
LOC27206361	291.846	-1.03435	0.229281	-4.51127	6.44397e-06	5.16865e-05
LOC27206363	0.250389	-0.982176	4.95834	-0.198086	0.842978	NA
LOC27206364	1.29686	-3.46365	3.27255	-1.05839	0.289876	NA
LOC27206365	0	NA	NA	NA	NA	NA
LOC27206366	0	NA	NA	NA	NA	NA
LOC27206367	0	NA	NA	NA	NA	NA
LOC27206369	1735.29	0.156708	0.110993	1.41187	0.157988	0.278508
LOC27206370	2.05911	-0.196082	2.25193	-0.0870727	0.930614	NA
LOC27206372	0.149495	-0.604684	4.97921	-0.121442	0.903341	NA
LOC27206373	0.332333	2.21155	4.99252	0.442973	0.657785	NA
LOC27206374	912.789	-0.223328	0.141729	-1.57574	0.115086	0.219215
LOC27206375	87.1624	-0.215241	0.369684	-0.582229	0.560412	0.693796
LOC27206376	0	NA	NA	NA	NA	NA
LOC27206377	1.1288	0.387975	3.46392	0.112005	0.91082	NA
LOC27206378	883.721	-0.104403	0.143191	-0.729116	0.465931	0.610017
LOC27206379	270.477	-2.35179	0.271641	-8.6577	4.81379e-18	1.67874e-16
LOC27206380	0	NA	NA	NA	NA	NA
LOC27206381	8143.73	0.0518325	0.0827253	0.626562	0.530947	0.668743
LOC27206382	1.55834	0.622761	2.74925	0.22652	0.820797	NA
LOC27206383	5.61687	-0.942872	1.43104	-0.658874	0.509977	0.651444
LOC27206384	0.250389	-0.982176	4.95834	-0.198086	0.842978	NA
LOC27206385	0.62802	3.14517	4.82894	0.651318	0.514841	NA
LOC27206386	1256.39	0.0812245	0.127149	0.638815	0.522943	0.662065
LOC27206387	2213.22	-0.417445	0.103611	-4.02894	5.60278e-05	0.000354615
LOC27206388	5.93049	-1.0625	1.42926	-0.743392	0.457245	0.602579
LOC27206389	3415.68	0.362641	0.103821	3.49296	0.000477701	0.0023286
LOC27206391	0.481828	0.867353	4.97421	0.17437	0.861575	NA
LOC27206392	1304.89	0.0167347	0.124949	0.133932	0.893457	0.935429
LOC27206393	541.45	0.453476	0.163082	2.78066	0.00542483	0.0186311
LOC27206394	0	NA	NA	NA	NA	NA
LOC27206395	1.04623	0.713081	3.07185	0.232134	0.816434	NA
LOC27206396	5.60884	-1.7148	1.50601	-1.13864	0.254855	0.395808
LOC27206397	2136.2	-0.146235	0.109413	-1.33654	0.181374	0.308276
LOC27206398	4603.39	-0.204591	0.0918023	-2.22861	0.02584	0.0669367
LOC27206399	14537.1	0.135981	0.0858033	1.58479	0.113013	0.21629
LOC27206400	0.399884	-1.7421	4.89227	-0.356093	0.721771	NA
LOC27206402	1707.63	0.0962798	0.110999	0.867397	0.385725	0.535439
LOC27206403	35.0592	0.0544407	0.585125	0.0930412	0.925871	0.953675
LOC27206404	0	NA	NA	NA	NA	NA
LOC27206405	0	NA	NA	NA	NA	NA
LOC27206406	2088.63	0.348634	0.10775	3.23559	0.0012139	0.00521943
LOC27206407	4.96597	-0.270907	1.51143	-0.179239	0.85775	0.912869
LOC27206408	0.250389	-0.982176	4.95834	-0.198086	0.842978	NA
LOC27206409	4.91713	0.561736	1.49098	0.376758	0.706354	0.804981
LOC27206410	0.698875	-2.56367	4.15942	-0.616352	0.537662	NA
LOC27206414	68.4648	-0.0618554	0.417263	-0.148241	0.882153	0.929008
LOC27206415	0	NA	NA	NA	NA	NA
LOC27206416	1.19572	0.228157	2.87782	0.0792812	0.936809	NA
LOC27206417	0	NA	NA	NA	NA	NA
LOC27206419	1.19965	-3.32863	3.33094	-0.999306	0.317646	NA
LOC27206420	0	NA	NA	NA	NA	NA
LOC27206421	69.4923	-0.237199	0.429448	-0.552335	0.580719	0.711227
LOC27206422	0.332333	2.21155	4.99252	0.442973	0.657785	NA
LOC27206423	0	NA	NA	NA	NA	NA
LOC27206424	10.8198	0.0769242	1.06936	0.0719349	0.942654	0.964406
LOC27206425	2.49651	-4.39801	2.54421	-1.72864	0.083874	NA
LOC27206426	241.403	1.03261	0.26542	3.89047	0.000100051	0.000588498
LOC27206427	64.305	0.19769	0.434706	0.454768	0.649276	0.762487
LOC27206428	7.53326	0.290268	1.29247	0.224583	0.822303	0.887925
LOC27206429	155.995	-0.487311	0.294479	-1.65482	0.0979602	0.193746
LOC27206430	538.513	0.263893	0.164845	1.60086	0.109409	0.211135
LOC27206431	0	NA	NA	NA	NA	NA
LOC27206432	0	NA	NA	NA	NA	NA
LOC27206433	28.2246	-0.476516	0.703377	-0.677468	0.498109	0.640177
LOC27206434	0.399884	-1.7421	4.89227	-0.356093	0.721771	NA
LOC27206435	0	NA	NA	NA	NA	NA
LOC27206436	8.67479	0.380769	1.19783	0.317883	0.750574	0.837737
LOC27206437	0.997866	-3.08291	3.60919	-0.854183	0.393004	NA
LOC27206438	456.795	0.049059	0.178748	0.274459	0.783732	0.860593
LOC27206440	1.36354	-0.0967164	2.91668	-0.0331598	0.973547	NA
LOC27206442	1389.83	-0.452768	0.146933	-3.08146	0.00205987	0.00813894
LOC27206443	0.54938	-2.21118	4.60119	-0.480568	0.630824	NA
LOC27206444	0	NA	NA	NA	NA	NA
LOC27206445	8697.08	0.120955	0.082725	1.46213	0.143704	0.259763
LOC27206446	0	NA	NA	NA	NA	NA
LOC27206447	391.018	-0.237933	0.188108	-1.26487	0.205917	0.338018
LOC27206448	1418.29	0.271307	0.11536	2.35182	0.0186817	0.0514929
LOC27206449	2711.85	-0.4694	0.104076	-4.51015	6.47803e-06	5.19125e-05
LOC27206450	572.544	0.00359561	0.159999	0.0224726	0.982071	0.98857
LOC27206451	1.09153	2.37842	3.56104	0.667899	0.504198	NA
LOC27206452	0	NA	NA	NA	NA	NA
LOC27206453	3.22111	-1.23228	2.138	-0.576372	0.564364	NA
LOC27206454	2636.09	0.188491	0.103458	1.8219	0.0684695	0.146273
LOC27206455	201.088	-0.0419955	0.25074	-0.167486	0.866987	0.919391
LOC27206456	29.0873	0.544476	0.675294	0.806279	0.420082	0.567767
LOC27206457	5302.3	0.105957	0.0960328	1.10335	0.269877	0.412459
LOC27206458	6.45352	-1.98854	1.43684	-1.38396	0.16637	0.289079
LOC27206459	29.4986	1.01414	0.628626	1.61327	0.106685	0.207319
LOC27206460	234.512	-1.92082	0.249237	-7.70682	1.28992e-14	3.37715e-13
LOC27206461	0	NA	NA	NA	NA	NA
LOC27206462	325.65	-0.15915	0.203172	-0.783327	0.433435	0.580391
LOC27206463	0	NA	NA	NA	NA	NA
LOC27206464	2572.24	0.210621	0.109768	1.91878	0.0550116	0.122722
LOC27206465	1.56227	-1.96664	2.86444	-0.686571	0.492353	NA
LOC27206466	220.043	-0.395546	0.27309	-1.44841	0.147502	0.265053
LOC27206467	0	NA	NA	NA	NA	NA
LOC27206468	0	NA	NA	NA	NA	NA
LOC27206469	0	NA	NA	NA	NA	NA
LOC27206470	516.613	-1.25681	0.830195	-1.51387	0.130058	0.240556
LOC27206471	9.15418	-0.0257518	1.12361	-0.0229187	0.981715	0.98857
LOC27206472	6.62252	-0.11853	1.3371	-0.0886468	0.929363	0.955907
LOC27206473	236.577	-0.884889	0.240701	-3.67629	0.000236648	0.00126183
LOC27206474	0	NA	NA	NA	NA	NA
LOC27206475	0.481828	0.867348	4.97421	0.174369	0.861576	NA
LOC27206476	17.113	0.284748	0.809835	0.351612	0.725129	0.818553
LOC27206477	20.7117	-1.16144	0.801095	-1.44981	0.14711	0.264618
LOC27206478	467.306	0.228018	0.174487	1.30679	0.191285	0.320132
LOC27206479	1073.41	0.123329	0.136289	0.904913	0.365511	0.514832
LOC27206480	927.988	0.160868	0.134282	1.19799	0.230922	0.368165
LOC27206481	7.30708	1.6796	1.28537	1.3067	0.191316	0.320132
LOC27206482	69.2804	0.572903	0.422735	1.35523	0.175344	0.300693
LOC27206483	0.298991	-1.37233	4.92304	-0.278757	0.780432	NA
LOC27206484	0.149495	-0.604684	4.97921	-0.121442	0.903341	NA
LOC27206485	0.149495	-0.604684	4.97921	-0.121442	0.903341	NA
LOC27206486	1.1321	-1.27702	3.22771	-0.395644	0.692367	NA
LOC27206487	0	NA	NA	NA	NA	NA
LOC27206488	0	NA	NA	NA	NA	NA
LOC27206490	0.250389	-0.982176	4.95834	-0.198086	0.842978	NA
LOC27206491	0.31401	2.17029	4.99541	0.434457	0.663957	NA
LOC27206492	0	NA	NA	NA	NA	NA
LOC27206493	87.9142	-0.229154	0.379787	-0.603374	0.54626	0.682284
LOC27206494	3.83756	0.0334993	1.66772	0.0200869	0.983974	NA
LOC27206495	0	NA	NA	NA	NA	NA
LOC27206496	584.477	-0.141378	0.166145	-0.850933	0.394806	0.543513
LOC27206497	0	NA	NA	NA	NA	NA
LOC27206498	1.32933	4.21938	3.5646	1.18369	0.236535	NA
LOC27206499	0	NA	NA	NA	NA	NA
LOC27206500	0	NA	NA	NA	NA	NA
LOC27206501	184.605	-1.81173	0.298454	-6.07038	1.27605e-09	1.92454e-08
LOC27206502	0	NA	NA	NA	NA	NA
LOC27206503	0.564399	0.45884	4.68974	0.0978393	0.92206	NA
LOC27206504	2.91117	-0.993864	1.99338	-0.498582	0.618074	NA
LOC27206505	0	NA	NA	NA	NA	NA
LOC27206506	132.446	-3.13592	0.364091	-8.61301	7.11665e-18	2.45274e-16
LOC27206507	10441.2	-0.199939	0.0844824	-2.36663	0.0179509	0.0497896
LOC27206508	5.94095	0.228023	1.60235	0.142305	0.886839	0.93173
LOC27206509	0	NA	NA	NA	NA	NA
LOC27206510	761.072	-0.287532	0.143072	-2.00971	0.0444618	0.10334
LOC27206511	0	NA	NA	NA	NA	NA
LOC27206512	295.793	1.22875	0.227205	5.40813	6.36874e-08	7.45244e-07
LOC27206513	0.463506	0.826076	4.97712	0.165975	0.868177	NA
LOC27206514	189.286	0.541683	0.258334	2.09683	0.0360088	0.0873777
LOC27206515	238.834	0.29521	0.232085	1.27199	0.203377	0.3349
LOC27206516	986.051	0.188184	0.134251	1.40174	0.160994	0.282257
LOC27206517	705.984	0.390186	0.156173	2.49842	0.012475	0.036967
LOC27206518	169.455	-0.417745	0.275971	-1.51373	0.130095	0.240556
LOC27206519	3923.42	-0.068067	0.0972556	-0.699877	0.484004	0.626897
LOC27206520	0	NA	NA	NA	NA	NA
LOC27206521	414.156	-0.305215	0.190956	-1.59835	0.109965	0.211885
LOC27206522	0.582722	0.500796	4.63248	0.108105	0.913912	NA
LOC27206523	0.298991	-1.37233	4.92304	-0.278757	0.780432	NA
LOC27206524	2490.43	-0.280987	0.0994926	-2.8242	0.0047399	0.0166586
LOC27206525	57.2011	-0.895021	0.460162	-1.94501	0.0517732	0.116677
LOC27206526	291.995	-0.670245	0.214451	-3.12539	0.00177568	0.00722662
LOC27206527	206.237	0.097678	0.269608	0.362296	0.717131	0.813166
LOC27206528	211.391	-0.105246	0.258128	-0.407729	0.683473	0.78786
LOC27206529	0	NA	NA	NA	NA	NA
LOC27206531	676.03	-0.539107	0.150029	-3.59335	0.00032645	0.0016775
LOC27206532	4.16989	0.260648	1.60444	0.162454	0.870948	NA
LOC27206533	1.54701	-0.442257	2.62936	-0.168199	0.866426	NA
LOC27206534	1.29662	0.0257943	2.80526	0.00919498	0.992664	NA
LOC27206535	263.745	-1.97339	0.273716	-7.20963	5.61057e-13	1.30269e-11
LOC27206536	5545.15	0.0536947	0.0962054	0.558126	0.576759	0.707654
LOC27206538	0	NA	NA	NA	NA	NA
LOC27206539	2.39193	-4.35021	2.89527	-1.50252	0.132962	NA
LOC27206541	0	NA	NA	NA	NA	NA
LOC27206542	1171.94	0.0876178	0.12995	0.674242	0.500157	0.641875
LOC27206543	18.2526	-3.0834	0.950846	-3.24279	0.00118364	0.00511673
LOC27206544	4.15653	0.574591	2.05891	0.279076	0.780187	NA
LOC27206545	0.250389	-0.982176	4.95834	-0.198086	0.842978	NA
LOC27206546	0	NA	NA	NA	NA	NA
LOC27206547	0	NA	NA	NA	NA	NA
LOC27206548	3.40346	1.72822	1.82473	0.947109	0.343583	NA
LOC27206549	0	NA	NA	NA	NA	NA
LOC27206550	4070.7	0.080056	0.0949664	0.842993	0.399232	0.54792
LOC27206551	1286.09	0.15814	0.120267	1.31491	0.188542	0.316737
LOC27206552	10.3968	-2.45145	1.16439	-2.10535	0.0352608	0.0858698
LOC27206553	9.56405	1.6007	1.12083	1.42814	0.153251	0.272883
LOC27206554	18.4697	0.737048	0.833878	0.88388	0.376761	0.526475
LOC27206555	0.481828	0.867353	4.97421	0.17437	0.861575	NA
LOC27206556	530.253	-0.0770677	0.164833	-0.467549	0.640107	0.757209
LOC27206557	0	NA	NA	NA	NA	NA
LOC27206558	0	NA	NA	NA	NA	NA
LOC27206559	2.29841	-4.27111	2.61271	-1.63474	0.102103	NA
LOC27206560	62.4262	-1.26377	0.449339	-2.81251	0.0049157	0.0171496
LOC27206561	0.582722	0.500796	4.63248	0.108105	0.913912	NA
LOC27206562	0	NA	NA	NA	NA	NA
LOC27206564	0	NA	NA	NA	NA	NA
LOC27206565	0.777516	1.798	4.06627	0.442175	0.658362	NA
LOC27206567	874.266	-0.0826795	0.136189	-0.607095	0.543788	0.679774
LOC27206568	29.4785	-1.85909	0.701722	-2.64932	0.00806537	0.0258955
LOC27206569	0.646343	3.18264	4.34916	0.731782	0.464302	NA
LOC27206570	4.40613	-1.843	1.68291	-1.09513	0.273459	NA
LOC27206571	0	NA	NA	NA	NA	NA
LOC27206572	301.269	-0.853824	0.218307	-3.91112	9.18683e-05	0.000545093
LOC27206573	664.089	-0.076883	0.15597	-0.492934	0.622059	0.744579
LOC27206574	3253.08	0.234519	0.0947529	2.47506	0.0133213	0.0390609
LOC27206575	5.25211	0.743254	1.55532	0.477878	0.632737	0.752174
LOC27206576	9.48001	-1.10245	1.16871	-0.943304	0.345525	0.495944
LOC27206577	569.626	-0.181275	0.159351	-1.13758	0.255294	0.396212
LOC27206578	3258.68	-0.407032	0.118605	-3.43183	0.00059952	0.00284691
LOC27206579	49.2614	-0.762773	0.511649	-1.49081	0.13601	0.24876
LOC27206580	252.616	-0.279113	0.247347	-1.12843	0.259139	0.400684
LOC27206581	35.3423	2.3968	0.604265	3.96647	7.2944e-05	0.000447556
LOC27206582	0	NA	NA	NA	NA	NA
LOC27206583	1249.3	-0.327578	0.126946	-2.58045	0.00986722	0.0306544
LOC27206584	9.22959	-1.10651	1.14117	-0.969634	0.332229	0.482432
LOC27206586	1801	-0.0154952	0.124995	-0.123967	0.901341	0.938775
LOC27206587	5383.23	0.0903307	0.0908513	0.99427	0.320091	0.468586
LOC27206588	1398.36	0.292661	0.116751	2.50672	0.0121859	0.0362739
LOC27206589	3235.26	-0.35985	0.0960698	-3.74571	0.000179886	0.000988868
LOC27206590	8.67377	0.720853	1.17556	0.6132	0.539744	0.675889
LOC27206591	47.5556	-0.26027	0.509284	-0.511049	0.609316	0.735833
LOC27206592	44.0386	-1.02004	0.526535	-1.93726	0.0527131	0.118433
LOC27206593	0	NA	NA	NA	NA	NA
LOC27206595	359.902	-0.953754	0.198708	-4.79977	1.58851e-06	1.42578e-05
LOC27206596	59.9083	9.71756	1.50707	6.44798	1.13349e-10	1.93439e-09
LOC27206597	1.74903	-3.87551	2.88146	-1.34498	0.178631	NA
LOC27206598	0.650274	-2.43702	4.30458	-0.566146	0.571294	NA
LOC27206599	0	NA	NA	NA	NA	NA
LOC27206600	111.363	-2.43679	0.376049	-6.47998	9.17356e-11	1.58703e-09
LOC27206601	0	NA	NA	NA	NA	NA
LOC27206602	963.548	-0.0372406	0.133787	-0.278357	0.780738	0.858374
LOC27206603	0.332333	2.21155	4.99252	0.442973	0.657785	NA
LOC27206604	0	NA	NA	NA	NA	NA
LOC27206605	0.250389	-0.982176	4.95834	-0.198086	0.842978	NA
LOC27206606	0	NA	NA	NA	NA	NA
LOC27206607	0.949264	-2.99624	3.65412	-0.819961	0.412238	NA
LOC27206608	516.149	-0.370547	0.165728	-2.23587	0.0253601	0.0659064
LOC27206609	0	NA	NA	NA	NA	NA
LOC27206610	1117.44	-0.306196	0.125572	-2.4384	0.0147523	0.0425498
LOC27206611	0	NA	NA	NA	NA	NA
LOC27206612	0.332333	2.21155	4.99252	0.442973	0.657785	NA
LOC27206613	0.814161	1.86827	3.99581	0.467557	0.640101	NA
LOC27206614	24.9395	-0.194787	0.681872	-0.285665	0.775135	0.855515
LOC27206615	414.18	0.480168	0.19298	2.48817	0.0128402	0.0378767
LOC27206616	0.77321	0.0220257	4.06449	0.00541906	0.995676	NA
LOC27206617	7.29379	-0.330588	1.24935	-0.264609	0.791311	0.865469
LOC27206618	12.3216	-3.09652	1.17349	-2.63873	0.00832175	0.0265448
LOC27206619	547.582	-0.180113	0.161466	-1.11549	0.264643	0.4061
LOC27206620	265.932	0.529519	0.224434	2.35936	0.0183067	0.0506332
LOC27206621	874.936	0.115122	0.135445	0.849949	0.395354	0.543966
LOC27206622	21.1776	-1.34563	2.38483	-0.564246	0.572587	0.703587
LOC27206623	0.833111	-0.564395	3.98787	-0.141528	0.887453	NA
LOC27206624	0.332333	2.21155	4.99252	0.442973	0.657785	NA
LOC27206625	0	NA	NA	NA	NA	NA
LOC27206627	0	NA	NA	NA	NA	NA
LOC27206630	1448.4	-0.0152711	0.119712	-0.127566	0.898493	0.937889
LOC27206632	2142.32	-0.118918	0.122881	-0.967747	0.333171	0.483084
LOC27206633	1050.95	-0.859011	0.135199	-6.35369	2.10208e-10	3.45376e-09
LOC27206634	1627.03	-0.703154	0.117668	-5.97572	2.29071e-09	3.33513e-08
LOC27206637	1.92401	2.32054	2.55549	0.908059	0.363847	NA
LOC27206639	136.906	-0.335119	0.302948	-1.10619	0.268643	0.411142
LOC27206640	0.463506	0.826076	4.97712	0.165975	0.868177	NA
LOC27206641	0	NA	NA	NA	NA	NA
LOC27206642	4049.61	-0.549536	0.0914426	-6.00963	1.8595e-09	2.75742e-08
LOC27206643	1566.63	-0.0534996	0.116007	-0.461176	0.644673	0.759304
LOC27206647	15.3491	1.01886	0.90841	1.12158	0.262041	0.403981
LOC27206648	4.21849	0.206554	1.60212	0.128925	0.897417	NA
LOC27206649	3.47243	5.61166	2.40663	2.33175	0.019714	NA
LOC27206650	0	NA	NA	NA	NA	NA
LOC27206653	0	NA	NA	NA	NA	NA
LOC27206654	0	NA	NA	NA	NA	NA
LOC27206655	740.739	0.465219	0.172983	2.68939	0.00715831	0.02347
LOC27206657	1993.2	-0.297972	0.108868	-2.73701	0.00620005	0.0208023
LOC27206658	227.227	0.277652	0.235567	1.17866	0.238535	0.376965
LOC27206661	0	NA	NA	NA	NA	NA
LOC27206662	0.298991	-1.37233	4.92304	-0.278757	0.780432	NA
LOC27206663	1569.18	0.113927	0.112017	1.01705	0.309131	0.456938
LOC27206665	1072.35	0.430984	0.127112	3.39059	0.000697413	0.0032454
LOC27206671	1923.78	-0.233238	0.117435	-1.9861	0.0470224	0.108182
LOC27206672	0	NA	NA	NA	NA	NA
LOC27206673	0	NA	NA	NA	NA	NA
LOC27206674	0	NA	NA	NA	NA	NA
LOC27206675	27.5198	-2.60114	0.746368	-3.48507	0.000492011	0.00238779
LOC27206676	0	NA	NA	NA	NA	NA
LOC27206677	291.098	-0.350896	0.216035	-1.62425	0.104322	0.203771
LOC27206678	0.250389	-0.982176	4.95834	-0.198086	0.842978	NA
LOC27206679	173.111	0.187894	0.274125	0.685431	0.493072	0.635648
LOC27206680	0	NA	NA	NA	NA	NA
LOC27206685	437.102	-0.164781	0.177292	-0.929436	0.352663	0.502256
LOC27206687	0.250389	-0.982176	4.95834	-0.198086	0.842978	NA
LOC27206688	1.09876	-3.21113	3.44561	-0.931946	0.351364	NA
LOC27206689	732.009	0.107442	0.144353	0.744303	0.456693	0.602213
LOC27206690	8.49407	6.89711	1.86284	3.70247	0.000213512	0.00114867
LOC27206693	510.663	0.348497	0.171522	2.03179	0.0421746	0.099149
LOC27206694	405.814	-0.644675	0.190098	-3.39128	0.000695678	0.00323903
LOC27206695	0	NA	NA	NA	NA	NA
LOC27206696	1.15105	-3.25628	3.44895	-0.944137	0.3451	NA
LOC27206698	67.2307	0.293	0.415597	0.70501	0.480804	0.624027
LOC27206699	1286.46	-0.150744	0.1298	-1.16135	0.2455	0.384681
LOC27206700	54.3935	0.252808	0.470423	0.537405	0.590988	0.719807
LOC27206702	1803.53	0.249581	0.109217	2.28517	0.0223027	0.0596113
LOC27206703	0.399884	-1.7421	4.89227	-0.356093	0.721771	NA
LOC27206706	1487.88	-0.122551	0.119867	-1.02239	0.306596	0.454715
LOC27206707	95.9549	0.621671	0.355802	1.74724	0.0805955	0.165756
LOC27206710	0	NA	NA	NA	NA	NA
LOC27206711	0	NA	NA	NA	NA	NA
LOC27206713	4.40589	-0.786743	1.59886	-0.492065	0.622673	NA
LOC27206715	0	NA	NA	NA	NA	NA
LOC27206716	52.2374	-1.33739	0.513337	-2.60528	0.00917991	0.0288956
LOC27206717	0	NA	NA	NA	NA	NA
LOC27206719	0.31401	2.17029	4.99541	0.434457	0.663957	NA
LOC27206725	0	NA	NA	NA	NA	NA
LOC27206726	5.43753	-2.16167	1.57875	-1.36923	0.170927	0.294779
LOC27206728	471.553	0.322233	0.185543	1.7367	0.0824398	0.168645
LOC27206729	1.92794	0.0438711	2.3183	0.0189238	0.984902	NA
LOC27206732	30.7183	-2.00471	0.664852	-3.01528	0.00256742	0.00986602
LOC27206733	1668.22	-1.01672	0.12003	-8.47058	2.44175e-17	7.97911e-16
LOC27206735	3.89402	-2.32662	1.84901	-1.25831	0.208281	NA
LOC27206740	61.9764	0.206539	0.43595	0.473768	0.635665	0.754436
LOC27206741	75.2429	-3.81922	2.3751	-1.60802	0.10783	0.208866
LOC27206742	4.76307	2.15576	1.60544	1.34279	0.179341	0.305763
LOC27206743	251.88	0.0723307	0.228321	0.316794	0.7514	0.838217
LOC27206744	0.997866	-3.08291	3.60919	-0.854183	0.393004	NA
LOC27206745	121.371	0.579462	0.431453	1.34305	0.179257	0.305678
LOC27206746	3485.5	-0.00847324	0.100165	-0.0845928	0.932585	0.957658
LOC27206748	0	NA	NA	NA	NA	NA
LOC27206749	2304.19	-0.164859	0.138266	-1.19233	0.233134	0.370553
LOC27206758	0	NA	NA	NA	NA	NA
LOC27206759	141.967	2.1967	0.312047	7.03962	1.9276e-12	4.1481e-11
LOC27206761	0.298991	-1.37233	4.92304	-0.278757	0.780432	NA
LOC27206762	0	NA	NA	NA	NA	NA
LOC27206763	1173.02	-0.0635526	0.12257	-0.518501	0.604109	0.730945
LOC27206764	1041.27	-0.2127	0.132163	-1.60938	0.107533	0.208382
LOC27206765	0	NA	NA	NA	NA	NA
LOC27206766	641.381	-0.132441	0.15275	-0.867041	0.385919	0.535479
LOC27206767	1495.07	0.618778	0.127823	4.84088	1.29266e-06	1.18247e-05
LOC27206769	0	NA	NA	NA	NA	NA
LOC27206770	3.26183	-0.552653	1.88569	-0.293077	0.769463	NA
LOC27206772	0	NA	NA	NA	NA	NA
LOC27206776	1.0835	-1.15829	3.60895	-0.320948	0.74825	NA
LOC27206777	0.582722	0.500796	4.63248	0.108105	0.913912	NA
LOC27206778	0.949264	-2.99624	3.65412	-0.819961	0.412238	NA
LOC27206782	147.21	-0.644469	0.294338	-2.18955	0.0285567	0.0725888
LOC27206783	0	NA	NA	NA	NA	NA
LOC27206785	24.6652	0.829739	0.684565	1.21207	0.225486	0.361327
LOC27206788	1.22906	2.15025	3.15493	0.681552	0.495523	NA
LOC27206789	0.799769	-2.74356	3.92572	-0.698869	0.484634	NA
LOC27206791	0	NA	NA	NA	NA	NA
LOC27206792	596.283	-0.274351	0.158995	-1.72553	0.0844326	0.171766
LOC27206793	9.60903	0.170156	1.17924	0.144293	0.885269	0.930624
LOC27206796	0.149495	-0.604684	4.97921	-0.121442	0.903341	NA
LOC27206800	0	NA	NA	NA	NA	NA
LOC27206801	7.51084	-0.667349	1.23571	-0.540051	0.589162	0.718079
LOC27206804	0	NA	NA	NA	NA	NA
LOC27206808	6740.95	-1.35958	0.0897429	-15.1497	7.61144e-52	1.79169e-49
LOC27206810	1340.83	0.570781	0.130109	4.38696	1.14947e-05	8.73537e-05
LOC27206812	3.66258	-3.37416	2.18992	-1.54077	0.123373	NA
LOC27206814	1468.21	-0.0481773	0.121168	-0.397609	0.690919	0.793515
LOC27206819	0	NA	NA	NA	NA	NA
LOC27206823	0.664666	3.21916	4.7171	0.682444	0.494958	NA
LOC27206825	24.9213	-0.80881	0.691079	-1.17036	0.241857	0.380645
LOC27206826	398.562	0.0578417	0.184731	0.313114	0.754194	0.840175
LOC27206829	2988.27	0.13124	0.106637	1.23071	0.218431	0.352905
LOC27206830	0.298991	-1.37233	4.92304	-0.278757	0.780432	NA
LOC27206832	92.7019	-0.0704303	0.363021	-0.194011	0.846167	0.904515
LOC27206834	70.9034	-1.7328	0.437747	-3.95846	7.54352e-05	0.000460918
LOC27206835	147.037	0.0798307	0.292246	0.273163	0.784728	0.861033
LOC27206838	17725.6	-0.279787	0.113086	-2.47411	0.013357	0.0391134
LOC27206842	21573.4	-0.251435	0.0981272	-2.56233	0.0103972	0.0319855
LOC27206843	157.76	-1.72503	0.322092	-5.35572	8.52181e-08	9.70167e-07
LOC27206844	69.4587	2.2614	0.429133	5.2697	1.3665e-07	1.50243e-06
LOC27206848	1268.27	0.054089	0.12259	0.441218	0.659055	0.769235
LOC27206849	0	NA	NA	NA	NA	NA
LOC27206851	504.588	0.174913	0.171209	1.02164	0.306953	0.455015
LOC27206855	0	NA	NA	NA	NA	NA
LOC27206856	1.1288	0.387975	3.46392	0.112005	0.91082	NA
LOC27206861	0	NA	NA	NA	NA	NA
LOC27206863	0	NA	NA	NA	NA	NA
LOC27206864	14163.6	-1.3397	0.110419	-12.1328	7.079e-34	7.17908e-32
LOC27206867	1.66166	4.54139	3.28085	1.38421	0.166294	NA
LOC27206872	0	NA	NA	NA	NA	NA
LOC27206875	0	NA	NA	NA	NA	NA
LOC27206876	2018.63	0.303554	0.113815	2.66709	0.00765121	0.0247549
LOC27206879	162.633	-0.775467	0.278796	-2.78149	0.00541102	0.0185981
LOC27206885	0	NA	NA	NA	NA	NA
LOC27206886	41.2069	-0.024458	0.534015	-0.0458002	0.963469	0.977415
LOC27206887	2.85888	-0.976633	1.97164	-0.49534	0.62036	NA
LOC27206889	0	NA	NA	NA	NA	NA
LOC27206892	4677.97	0.184824	0.100205	1.84447	0.0651151	0.140398
LOC27206893	59.1498	-0.60028	0.466476	-1.28684	0.198149	0.328006
LOC27206899	40.7855	0.100478	0.593752	0.169226	0.865619	0.918614
LOC27206903	309.089	-0.703365	0.212437	-3.31094	0.000929823	0.00416227
LOC27206904	422.546	-0.168248	0.184135	-0.913719	0.360865	0.510733
LOC27206905	0	NA	NA	NA	NA	NA
LOC27206906	0	NA	NA	NA	NA	NA
LOC27206907	0.298991	-1.37233	4.92304	-0.278757	0.780432	NA
LOC27206911	0	NA	NA	NA	NA	NA
LOC27206912	313.301	-0.400206	0.222421	-1.79932	0.0719683	0.152163
LOC27206913	110.506	-0.0395571	0.361489	-0.109428	0.912863	0.945105
LOC27206919	195.917	-0.275455	0.253994	-1.08449	0.278146	0.422244
LOC27206920	0	NA	NA	NA	NA	NA
LOC27206930	0.448486	-1.94496	4.87837	-0.39869	0.690122	NA
LOC27206932	0	NA	NA	NA	NA	NA
LOC27206933	61.888	0.203215	0.445381	0.456271	0.648195	0.761825
LOC27206934	0.332333	2.21155	4.99252	0.442973	0.657785	NA
LOC27206935	0.778569	-2.71048	3.96455	-0.683679	0.494178	NA
LOC27206936	1144.24	-0.123361	0.129677	-0.951295	0.341455	0.491701
LOC27206937	0.399884	-1.7421	4.89227	-0.356093	0.721771	NA
LOC27206939	2.5273	5.15344	2.57838	1.99871	0.0456398	NA
LOC27206943	1.51304	-0.381708	2.79751	-0.136446	0.891469	NA
LOC27206950	2432.65	0.484596	0.108087	4.48338	7.34682e-06	5.80833e-05
LOC27206951	0	NA	NA	NA	NA	NA
LOC27206952	5.48632	-1.28098	1.49581	-0.856377	0.391789	0.540794
LOC27206953	0	NA	NA	NA	NA	NA
LOC27206955	1078.41	0.106211	0.140861	0.754013	0.450841	0.596905
LOC27206956	1766.79	0.00538839	0.112391	0.0479431	0.961762	0.97649
LOC27206957	57.6383	-2.99058	0.533633	-5.6042	2.09221e-08	2.71066e-07
LOC27206963	0.149495	-0.604684	4.97921	-0.121442	0.903341	NA
LOC27206964	5.9039	-1.01559	1.40472	-0.722982	0.469691	0.613756
LOC27206967	14.3399	-6.9126	1.6834	-4.10633	4.01988e-05	0.00026488
LOC27206969	0	NA	NA	NA	NA	NA
LOC27206972	33.3098	-1.75268	0.652997	-2.68405	0.00727359	0.0237597
LOC27206975	4.78352	-0.175953	1.52832	-0.115129	0.908343	0.942424
LOC27206976	144.252	0.25323	0.296839	0.853089	0.39361	0.542374
LOC27206977	2.19752	-4.2111	2.65422	-1.58657	0.11261	NA
LOC27206978	2326.6	-0.259728	0.108336	-2.39742	0.016511	0.046557
LOC27206979	0	NA	NA	NA	NA	NA
LOC27206980	0	NA	NA	NA	NA	NA
LOC27206981	232.781	3.4212	0.274962	12.4425	1.53679e-35	1.67396e-33
LOC27206982	0	NA	NA	NA	NA	NA
LOC27206984	3744.97	0.378273	0.0915151	4.13345	3.57353e-05	0.000238137
LOC27206985	0.250389	-0.982176	4.95834	-0.198086	0.842978	NA
LOC27206986	0	NA	NA	NA	NA	NA
LOC27206987	0	NA	NA	NA	NA	NA
LOC27206988	1898.69	-0.16111	0.111784	-1.44126	0.149512	0.267629
LOC27206989	1.34915	-3.50184	3.17765	-1.10202	0.270452	NA
LOC27206992	0	NA	NA	NA	NA	NA
LOC27206999	381.739	0.181885	0.189009	0.962312	0.335893	0.485833
LOC27207001	0	NA	NA	NA	NA	NA
LOC27207003	22.3357	-1.5387	0.761409	-2.02085	0.0432948	0.101189
LOC27207007	0	NA	NA	NA	NA	NA
LOC27207009	0	NA	NA	NA	NA	NA
LOC27207010	442.43	-0.141511	0.207459	-0.682118	0.495164	0.63725
LOC27207011	0.814161	1.86827	3.99581	0.467557	0.640101	NA
LOC27207013	819.591	0.249809	0.147178	1.69733	0.0896339	0.180542
LOC27207014	1214.95	-0.0706968	0.122311	-0.578009	0.563258	0.695444
LOC27207015	990.354	-0.610837	0.142823	-4.2769	1.89518e-05	0.000134938
LOC27207018	2447.44	0.102875	0.100576	1.02285	0.306377	0.454466
LOC27207019	0	NA	NA	NA	NA	NA
LOC27207021	597.86	0.528024	0.156092	3.38278	0.000717557	0.00332336
LOC27207025	4.74586	-0.182378	1.6205	-0.112544	0.910392	0.943655
LOC27207026	1.1289	-3.26357	3.44289	-0.947915	0.343173	NA
LOC27207028	1098.12	0.24682	0.124871	1.9766	0.0480872	0.110144
LOC27207029	0	NA	NA	NA	NA	NA
LOC27207032	2841.69	0.465463	0.0989094	4.70595	2.52689e-06	2.18149e-05
LOC27207033	0	NA	NA	NA	NA	NA
LOC27207034	0	NA	NA	NA	NA	NA
LOC27207035	6.28571	-1.95745	1.42787	-1.37089	0.17041	0.294175
LOC27207039	127.496	0.593762	0.317227	1.87173	0.0612442	0.133554
LOC27207041	133.234	-1.34243	0.318936	-4.2091	2.56386e-05	0.000176573
LOC27207042	0	NA	NA	NA	NA	NA
LOC27207044	0	NA	NA	NA	NA	NA
LOC27207047	0.399884	-1.7421	4.89227	-0.356093	0.721771	NA
LOC27207049	4.43137	1.45394	1.58769	0.915761	0.359792	NA
LOC27207050	0	NA	NA	NA	NA	NA
LOC27207051	4.87332	-1.48066	1.58864	-0.932034	0.351319	0.501216
LOC27207054	0.31401	2.17029	4.99541	0.434457	0.663957	NA
LOC27207055	0	NA	NA	NA	NA	NA
LOC27207056	0	NA	NA	NA	NA	NA
LOC27207057	0.86339	-0.780876	3.5883	-0.217617	0.827727	NA
LOC27207059	0	NA	NA	NA	NA	NA
LOC27207061	998.033	0.737839	0.131733	5.60104	2.13069e-08	2.75243e-07
LOC27207062	1.25604	4.14503	3.63871	1.13915	0.254642	NA
LOC27207064	13.6065	-0.875304	0.941965	-0.929232	0.352769	0.502256
LOC27207071	1371.68	-0.040862	0.129504	-0.315528	0.752361	0.838989
LOC27207072	0.481828	0.867353	4.97421	0.17437	0.861575	NA
LOC27207073	544.998	0.118298	0.161788	0.731189	0.464664	0.6089
LOC27207079	3.10864	-0.469477	1.88895	-0.248538	0.803718	NA
LOC27207080	2.5974	-4.4509	2.50633	-1.77586	0.0757553	NA
LOC27207081	0	NA	NA	NA	NA	NA
LOC27207083	896.921	-0.304026	0.142855	-2.12822	0.0333188	0.0820234
LOC27207084	2.85495	0.352645	1.92262	0.183419	0.854469	NA
LOC27207085	2365.15	0.142518	0.101676	1.40168	0.161011	0.282257
LOC27207087	0.31401	2.17029	4.99541	0.434457	0.663957	NA
LOC27207090	0	NA	NA	NA	NA	NA
LOC27207092	556.803	0.283411	0.160746	1.7631	0.0778839	0.161954
LOC27207093	0.250389	-0.982176	4.95834	-0.198086	0.842978	NA
LOC27207094	0	NA	NA	NA	NA	NA
LOC27207097	0.500778	-2.04744	4.87204	-0.420242	0.674308	NA
LOC27207098	0	NA	NA	NA	NA	NA
LOC27207099	0	NA	NA	NA	NA	NA
LOC27207102	0	NA	NA	NA	NA	NA
LOC27207103	0	NA	NA	NA	NA	NA
LOC27207109	0	NA	NA	NA	NA	NA
LOC27207110	0.62802	3.14517	4.82894	0.651318	0.514841	NA
LOC27207112	1.34789	1.23993	2.77006	0.44762	0.654428	NA
LOC27207113	2.34308	-1.41023	2.21821	-0.63575	0.524939	NA
LOC27207114	594.241	0.13807	0.159411	0.866125	0.386421	0.536017
LOC27207118	0	NA	NA	NA	NA	NA
LOC27207119	1.76343	-0.740376	2.60607	-0.284097	0.776336	NA
LOC27207121	0.777516	1.798	4.06627	0.442175	0.658362	NA
LOC27207124	386.359	0.312149	0.187167	1.66775	0.0953644	0.189718
LOC27207125	6.06473	-0.757416	1.38125	-0.548354	0.583449	0.713284
LOC27207128	3.3518	1.02952	1.78908	0.575447	0.564989	NA
LOC27207129	811.887	-0.510464	0.140846	-3.62427	0.000289778	0.0015075
LOC27207131	0	NA	NA	NA	NA	NA
LOC27207133	0.250389	-0.982176	4.95834	-0.198086	0.842978	NA
LOC27207134	0	NA	NA	NA	NA	NA
LOC27207137	3839.87	-0.147528	0.0922735	-1.59881	0.109863	0.211827
LOC27207139	393.709	0.06558	0.198123	0.331006	0.74064	0.830326
LOC27207140	816.627	0.158843	0.646485	0.245702	0.805913	0.876225
LOC27207141	0.54938	-2.21118	4.60119	-0.480568	0.630824	NA
LOC27207143	303.768	-0.449746	0.214144	-2.1002	0.0357111	0.0868225
LOC27207145	4.62616	1.67531	1.56906	1.06771	0.28565	0.431533
LOC27207147	100.533	-0.120928	0.34446	-0.351065	0.72554	0.818703
LOC27207148	0	NA	NA	NA	NA	NA
LOC27207149	0.848371	-2.84658	3.84577	-0.740185	0.459188	NA
LOC27207150	1.25195	-3.3759	3.6679	-0.920391	0.357368	NA
LOC27207151	4.99585	-1.10494	1.55668	-0.709805	0.477825	0.620961
LOC27207152	279.341	-0.135688	0.231844	-0.585253	0.558378	0.692323
LOC27207153	7856.44	0.0793655	0.0820688	0.96706	0.333514	0.483343
LOC27207154	13.1323	1.34586	0.947628	1.42025	0.155536	0.275894
LOC27207155	0.900663	-2.90388	3.78146	-0.767924	0.442533	NA
LOC27207158	0	NA	NA	NA	NA	NA
LOC27207159	304.411	-0.0506075	0.211098	-0.239735	0.810536	0.879734
LOC27207160	3270.54	-0.105995	0.093885	-1.12898	0.258904	0.400475
LOC27207162	0	NA	NA	NA	NA	NA
LOC27207164	208.631	-0.408269	0.246886	-1.65367	0.0981937	0.194121
LOC27207166	6.58887	-5.80109	1.94383	-2.98436	0.00284177	0.0107379
LOC27207169	476.977	0.254007	0.170894	1.48635	0.137187	0.250497
LOC27207170	509.998	0.0792191	0.17134	0.462351	0.643829	0.75912
LOC27207173	20.4924	3.71625	0.887251	4.1885	2.80808e-05	0.000190729
LOC27207174	1484.42	-0.0264988	0.115578	-0.229271	0.818658	0.885391
LOC27207176	0	NA	NA	NA	NA	NA
LOC27207178	280.421	-0.704087	0.240292	-2.93013	0.00338816	0.0125183
LOC27207179	673.654	0.0149028	0.15224	0.0978907	0.922019	0.951014
LOC27207180	0	NA	NA	NA	NA	NA
LOC27207181	0	NA	NA	NA	NA	NA
LOC27207182	0	NA	NA	NA	NA	NA
LOC27207183	1531.17	0.0976829	0.115649	0.844646	0.398308	0.546884
LOC27207184	0	NA	NA	NA	NA	NA
LOC27207186	1299.46	-0.140862	0.124565	-1.13083	0.258125	0.399387
LOC27207188	0.298991	-1.37233	4.92304	-0.278757	0.780432	NA
LOC27207189	0	NA	NA	NA	NA	NA
LOC27207191	159.384	-0.631108	0.281581	-2.2413	0.0250067	0.0651608
LOC27207192	116.555	0.063926	0.32542	0.196442	0.844265	0.902986
LOC27207193	1.64091	0.421672	2.69278	0.156593	0.875565	NA
LOC27207199	0	NA	NA	NA	NA	NA
LOC27207200	0	NA	NA	NA	NA	NA
LOC27207201	0.597981	-2.35333	4.85554	-0.48467	0.627911	NA
LOC27207204	60.9015	-0.87712	0.49442	-1.77404	0.076057	0.15925
LOC27207207	0	NA	NA	NA	NA	NA
LOC27207208	0	NA	NA	NA	NA	NA
LOC27207209	880.821	-0.0601928	0.137342	-0.438269	0.661191	0.770837
LOC27207212	219.881	0.101659	0.239919	0.423722	0.671769	0.778437
LOC27207214	0	NA	NA	NA	NA	NA
LOC27207219	1743.93	0.188953	0.13645	1.38478	0.16612	0.288858
LOC27207223	0	NA	NA	NA	NA	NA
LOC27207224	94.2776	-0.81999	0.37376	-2.1939	0.0282428	0.0719776
LOC27207226	1443.92	0.0324404	0.116797	0.27775	0.781205	0.858673
LOC27207227	0	NA	NA	NA	NA	NA
LOC27207229	0	NA	NA	NA	NA	NA
LOC27207232	59.8014	1.49068	0.455691	3.27125	0.00107072	0.00470232
LOC27207234	0	NA	NA	NA	NA	NA
LOC27207236	0	NA	NA	NA	NA	NA
LOC27207238	0	NA	NA	NA	NA	NA
LOC27207240	0	NA	NA	NA	NA	NA
LOC27207242	0	NA	NA	NA	NA	NA
LOC27207245	865.286	0.092033	0.147321	0.624712	0.53216	0.669821
LOC27207247	0.31401	2.17029	4.99541	0.434457	0.663957	NA
LOC27207248	0	NA	NA	NA	NA	NA
LOC27207249	0	NA	NA	NA	NA	NA
LOC27207250	506.404	0.443059	0.176046	2.51672	0.0118453	0.0354757
LOC27207253	0.31401	2.17029	4.99541	0.434457	0.663957	NA
LOC27207254	0	NA	NA	NA	NA	NA
LOC27207255	0.62802	3.14517	4.82894	0.651318	0.514841	NA
LOC27207259	0	NA	NA	NA	NA	NA
LOC27207261	0.732217	-0.269776	3.85593	-0.069964	0.944222	NA
LOC27207264	456.345	-0.127607	0.17826	-0.715846	0.474086	0.618069
LOC27207266	514.09	-0.066864	0.171452	-0.389986	0.696547	0.797512
LOC27207267	200.465	-0.317597	0.283736	-1.11934	0.262996	0.404996
LOC27207268	0	NA	NA	NA	NA	NA
LOC27207269	0.54938	-2.21118	4.60119	-0.480568	0.630824	NA
LOC27207271	0	NA	NA	NA	NA	NA
LOC27207274	0.250389	-0.982176	4.95834	-0.198086	0.842978	NA
LOC27207276	0	NA	NA	NA	NA	NA
LOC27207277	3482.98	-0.547099	0.121532	-4.50169	6.74142e-06	5.36819e-05
LOC27207278	0	NA	NA	NA	NA	NA
LOC27207283	1134.16	0.364986	0.127993	2.85162	0.00434973	0.0154624
LOC27207284	1.0835	-1.15828	3.60895	-0.320947	0.74825	NA
LOC27207286	1.37856	1.31315	2.74667	0.478088	0.632587	NA
LOC27207290	0	NA	NA	NA	NA	NA
LOC27207291	500.589	0.32149	0.166947	1.92571	0.0541412	0.121056
LOC27207293	1.03121	-1.10477	3.35168	-0.329617	0.741689	NA
LOC27207294	71.3847	0.168523	0.405979	0.415103	0.678066	0.783881
LOC27207295	0.250389	-0.982176	4.95834	-0.198086	0.842978	NA
LOC27207296	0.62802	3.14517	4.82894	0.651318	0.514841	NA
LOC27207297	2912.03	0.459832	0.0985798	4.66456	3.09271e-06	2.63134e-05
LOC27207299	0.463506	0.826076	4.97712	0.165975	0.868177	NA
LOC27207304	0	NA	NA	NA	NA	NA
LOC27207305	2.31343	-2.62921	2.51105	-1.04705	0.295074	NA
LOC27207310	0.399884	-1.7421	4.89227	-0.356093	0.721771	NA
LOC27207317	476.003	-0.0356023	0.171683	-0.207372	0.835719	0.896807
LOC27207318	0.399884	-1.7421	4.89227	-0.356093	0.721771	NA
LOC27207320	0	NA	NA	NA	NA	NA
LOC27207322	1383.76	-0.36628	0.119144	-3.07427	0.00211019	0.00830602
LOC27207325	327.85	0.552379	0.200526	2.75464	0.00587563	0.0199083
LOC27207326	0	NA	NA	NA	NA	NA
LOC27207327	0	NA	NA	NA	NA	NA
LOC27207329	0.463506	0.826076	4.97712	0.165975	0.868177	NA
LOC27207331	0.31401	2.17029	4.99541	0.434457	0.663957	NA
LOC27207332	315.042	0.0634988	0.206897	0.30691	0.758912	0.84377
LOC27207333	43.6432	1.70246	0.529098	3.21767	0.00129235	0.00551905
LOC27207335	331.408	0.390962	0.210177	1.86016	0.0628629	0.136347
LOC27207338	0.896972	-2.93725	4.1419	-0.709155	0.478228	NA
LOC27207342	1.06455	0.743318	3.27447	0.227004	0.82042	NA
LOC27207344	30.5934	0.924021	0.613572	1.50597	0.132075	0.243227
LOC27207345	0	NA	NA	NA	NA	NA
LOC27207347	1870.16	-0.271033	0.120108	-2.25658	0.0240344	0.0632624
LOC27207348	2.47363	-0.653683	2.32444	-0.281222	0.77854	NA
LOC27207351	309.934	0.399532	0.207266	1.92762	0.053902	0.120583
LOC27207352	0	NA	NA	NA	NA	NA
LOC27207356	0	NA	NA	NA	NA	NA
LOC27207357	137.862	-0.271119	0.300207	-0.903106	0.36647	0.515865
LOC27207363	2.12604	-0.263312	2.2601	-0.116504	0.907253	NA
LOC27207364	1832.12	0.0915293	0.110826	0.825881	0.408871	0.557316
LOC27207366	0	NA	NA	NA	NA	NA
LOC27207370	121.38	0.0717694	0.32	0.224279	0.82254	0.887925
LOC27207372	484.524	-0.296278	0.17091	-1.73354	0.0829998	0.169633
LOC27207375	0	NA	NA	NA	NA	NA
LOC27207376	35.8152	3.23272	0.639104	5.05821	4.23204e-07	4.27222e-06
LOC27207378	1985.49	0.0492131	0.110574	0.445071	0.656268	0.767326
LOC27207379	0	NA	NA	NA	NA	NA
LOC27207380	0	NA	NA	NA	NA	NA
LOC27207382	14373.1	0.140582	0.077704	1.80919	0.070421	0.149579
LOC27207385	6.08863	-4.28583	1.94428	-2.20433	0.0275014	0.0704275
LOC27207386	118.512	0.164581	0.341353	0.482144	0.629703	0.750646
LOC27207387	0	NA	NA	NA	NA	NA
LOC27207388	1189.13	-0.357104	0.126058	-2.83284	0.0046136	0.0162693
LOC27207396	0	NA	NA	NA	NA	NA
LOC27207399	0.31401	2.17029	4.99541	0.434457	0.663957	NA
LOC27207400	225.768	-2.06094	0.25627	-8.04207	8.83328e-16	2.62411e-14
LOC27207403	10.4889	0.800884	1.0522	0.761151	0.446567	0.592312
LOC27207406	39.5773	-0.677128	0.557319	-1.21497	0.224376	0.360268
LOC27207407	3.44184	-2.12391	1.93428	-1.09804	0.272188	NA
LOC27207409	276.778	-0.432079	0.2171	-1.99024	0.046565	0.107326
LOC27207413	0	NA	NA	NA	NA	NA
LOC27207416	0	NA	NA	NA	NA	NA
LOC27207417	970.353	0.199104	0.131386	1.51542	0.129667	0.240073
LOC27207419	1.19965	-3.32863	3.33094	-0.999306	0.317646	NA
LOC27207421	33.7535	-1.88714	0.624764	-3.02056	0.00252306	0.00972942
LOC27207423	0.650274	-2.43702	4.30458	-0.566146	0.571294	NA
LOC27207425	1.63756	-0.354069	2.68709	-0.131767	0.895169	NA
LOC27207427	0	NA	NA	NA	NA	NA
LOC27207432	5171.35	-0.402438	0.0884891	-4.54788	5.41887e-06	4.41058e-05
LOC27207433	2.45861	-1.47225	2.56063	-0.574957	0.56532	NA
LOC27207436	2.65355	1.42564	2.27146	0.627631	0.530246	NA
LOC27207437	0	NA	NA	NA	NA	NA
LOC27207442	0	NA	NA	NA	NA	NA
LOC27207446	1.25934	1.59214	3.03681	0.524282	0.600082	NA
LOC27207448	32.7681	-1.45166	0.630826	-2.30121	0.0213796	0.0575801
LOC27207449	16.0215	-4.57265	1.42689	-3.20462	0.00135242	0.00574619
LOC27207450	503.607	-3.01516	0.195047	-15.4586	6.5999e-54	1.87842e-51
LOC27207454	0	NA	NA	NA	NA	NA
LOC27207455	15.7907	-0.271431	0.856206	-0.317017	0.751231	0.838217
LOC27207456	4.10627	-0.128973	1.63509	-0.0788782	0.93713	NA
LOC27207460	1332.97	-0.901924	0.14911	-6.04873	1.45992e-09	2.1981e-08
LOC27207461	0	NA	NA	NA	NA	NA
LOC27207462	0.332333	2.21155	4.99252	0.442973	0.657785	NA
LOC27207463	2696.15	0.320285	0.0974971	3.28507	0.00101957	0.00450458
LOC27207464	3.36296	-2.03426	2.03174	-1.00124	0.31671	NA
LOC27207466	1.93903	4.76764	2.80334	1.7007	0.0889992	NA
LOC27207467	2476.24	0.0236273	0.100738	0.234543	0.814564	0.882911
LOC27207473	139.974	-0.278122	0.294723	-0.943673	0.345337	0.495835
LOC27207474	8.0047	-3.49574	1.54165	-2.26753	0.0233578	0.0618505
LOC27207475	8.81681	1.51007	1.15625	1.30601	0.19155	0.320153
LOC27207476	0.481828	0.867353	4.97421	0.17437	0.861575	NA
LOC27207477	0	NA	NA	NA	NA	NA
LOC27207479	0.62802	3.14517	4.82894	0.651318	0.514841	NA
LOC27207481	0.149495	-0.604684	4.97921	-0.121442	0.903341	NA
LOC27207482	0.31401	2.17029	4.99541	0.434457	0.663957	NA
LOC27207483	1941.34	0.173646	0.112835	1.53895	0.123817	0.231784
LOC27207484	731.441	0.112643	0.149768	0.752114	0.451982	0.597763
LOC27207488	0	NA	NA	NA	NA	NA
LOC27207489	8.14609	-1.10142	1.20943	-0.910694	0.362457	0.512247
LOC27207490	2817.47	0.0576097	0.0977114	0.589591	0.555465	0.689719
LOC27207491	32.1126	1.35364	0.624646	2.16704	0.0302315	0.0759921
LOC27207493	0.149495	-0.604684	4.97921	-0.121442	0.903341	NA
LOC27207495	2806.69	-0.682734	0.105572	-6.46701	9.99628e-11	1.71257e-09
LOC27207496	1379.68	-0.0971914	0.116544	-0.833948	0.40431	0.552631
LOC27207497	0	NA	NA	NA	NA	NA
LOC27207498	396.1	0.223305	0.195515	1.14214	0.253396	0.394306
LOC27207504	1332.23	-0.126353	0.138578	-0.91178	0.361885	0.511679
LOC27207506	9.16416	-2.25601	1.31406	-1.71683	0.0860109	0.174454
LOC27207507	0.149495	-0.604684	4.97921	-0.121442	0.903341	NA
LOC27207508	0.98543	0.833016	3.8601	0.215801	0.829143	NA
LOC27207511	0	NA	NA	NA	NA	NA
LOC27207513	93.2012	0.464761	0.381074	1.21961	0.222614	0.357894
LOC27207514	107.494	1.84902	0.343563	5.3819	7.37028e-08	8.48929e-07
LOC27207517	248.243	0.176195	0.232708	0.757151	0.448959	0.594973
LOC27207519	4.8882	-2.72864	1.74518	-1.56353	0.117928	0.223654
LOC27207520	938.312	0.353262	0.132915	2.65781	0.00786506	0.0253817
LOC27207521	0.298991	-1.37233	4.92304	-0.278757	0.780432	NA
LOC27207522	1898.55	0.0790324	0.107444	0.73557	0.461992	0.606933
LOC27207524	83.2495	-1.79228	0.415098	-4.31772	1.57649e-05	0.000114574
LOC27207525	2683.13	-0.0492298	0.0978666	-0.50303	0.614944	0.740084
LOC27207531	0	NA	NA	NA	NA	NA
LOC27207532	0.250389	-0.982176	4.95834	-0.198086	0.842978	NA
LOC27207534	0.500778	-2.04744	4.87204	-0.420242	0.674308	NA
LOC27207535	145.97	-1.15776	0.301475	-3.84033	0.000122871	0.000705786
LOC27207536	0	NA	NA	NA	NA	NA
LOC27207538	0	NA	NA	NA	NA	NA
LOC27207539	0	NA	NA	NA	NA	NA
LOC27207542	236.464	-0.225296	0.240678	-0.936089	0.349227	0.499309
LOC27207543	0	NA	NA	NA	NA	NA
LOC27207545	1224.35	0.239932	0.124195	1.9319	0.0533719	0.119548
LOC27207546	1.67818	-0.711135	2.67512	-0.265833	0.790368	NA
LOC27207547	2.19335	0.569169	2.22413	0.255907	0.798023	NA
LOC27207548	3.66581	1.21809	1.72602	0.705725	0.480359	NA
LOC27207551	0.149495	-0.604684	4.97921	-0.121442	0.903341	NA
LOC27207557	9027.35	-0.278695	0.0831426	-3.35202	0.000802251	0.00365991
LOC27207558	1.83288	-0.767574	2.48859	-0.308437	0.75775	NA
LOC27207560	434.347	-0.28781	0.177701	-1.61963	0.105312	0.205341
LOC27207566	464.634	-0.485837	0.181985	-2.66966	0.00759286	0.0246203
LOC27207568	675.24	0.163023	0.153694	1.0607	0.288828	0.435156
LOC27207569	0	NA	NA	NA	NA	NA
LOC27207570	0	NA	NA	NA	NA	NA
LOC27207571	0	NA	NA	NA	NA	NA
LOC27207572	0.332333	2.21155	4.99252	0.442973	0.657785	NA
LOC27207579	0.149495	-0.604684	4.97921	-0.121442	0.903341	NA
LOC27207580	0	NA	NA	NA	NA	NA
LOC27207582	0	NA	NA	NA	NA	NA
LOC27207583	0	NA	NA	NA	NA	NA
LOC27207584	0	NA	NA	NA	NA	NA
LOC27207586	532.445	-0.0966082	0.163835	-0.589666	0.555414	0.689719
LOC27207587	4.7199	-0.527304	1.54368	-0.341589	0.73266	0.824418
LOC27207588	0	NA	NA	NA	NA	NA
LOC27207590	1.11315	0.506386	3.44764	0.146879	0.883227	NA
LOC27207593	7.2389	-3.35406	1.54332	-2.17328	0.0297591	0.0749755
LOC27207594	9.3721	-0.937959	1.12217	-0.835844	0.403242	0.551598
LOC27207597	34.2313	1.0616	0.587851	1.8059	0.070934	0.150517
LOC27207599	0.732217	-0.269776	3.85593	-0.069964	0.944222	NA
LOC27207600	3.10864	-0.469477	1.88895	-0.248538	0.803718	NA
LOC27207601	5671.64	-0.203448	0.099649	-2.04165	0.0411866	0.0974235
LOC27207603	0	NA	NA	NA	NA	NA
LOC27207608	0	NA	NA	NA	NA	NA
LOC27207609	0	NA	NA	NA	NA	NA
LOC27207612	1.27829	-0.0112619	3.01666	-0.00373322	0.997021	NA
LOC27207613	0.399884	-1.7421	4.89227	-0.356093	0.721771	NA
LOC27207615	11.6488	2.1197	1.01926	2.07963	0.037559	0.0903691
LOC27207617	0.795838	1.83084	3.71852	0.492357	0.622467	NA
LOC27207618	278.059	0.380405	0.221244	1.71939	0.0855435	0.173626
LOC27207621	7.39273	-2.28666	1.48641	-1.53837	0.123957	0.231907
LOC27207622	0	NA	NA	NA	NA	NA
LOC27207623	0.399884	-1.7421	4.89227	-0.356093	0.721771	NA
LOC27207625	238.935	-0.189974	0.232814	-0.815992	0.414505	0.562489
LOC27207626	0	NA	NA	NA	NA	NA
LOC27207627	0.399884	-1.7421	4.89227	-0.356093	0.721771	NA
LOC27207629	178.622	-0.418032	0.265171	-1.57646	0.114919	0.219112
LOC27207630	0.747477	-2.6745	4.46248	-0.599332	0.548952	NA
LOC27207631	0	NA	NA	NA	NA	NA
LOC27207632	0.149495	-0.604684	4.97921	-0.121442	0.903341	NA
LOC27207633	2037.13	0.512572	0.118448	4.3274	1.50877e-05	0.000110106
LOC27207634	0	NA	NA	NA	NA	NA
LOC27207637	10.1837	-2.78403	1.21422	-2.29285	0.0218568	0.0586683
LOC27207640	2.19359	-1.2753	2.26663	-0.56264	0.57368	NA
LOC27207641	416.83	0.40137	0.187754	2.13774	0.0325375	0.0804366
LOC27207642	2671.6	-0.134244	0.0991551	-1.35388	0.175775	0.301022
LOC27207643	1.1774	0.196534	3.10172	0.063363	0.949477	NA
LOC27207645	6.97537	1.25004	1.298	0.963053	0.335521	0.485534
LOC27207647	560.33	0.0519265	0.161062	0.322401	0.747149	0.835517
LOC27207649	76.7889	-2.81174	0.482838	-5.82336	5.76759e-09	7.97609e-08
LOC27207650	0	NA	NA	NA	NA	NA
LOC27207651	119.882	0.0629668	0.334216	0.188402	0.850562	0.907437
LOC27207653	1.05016	-3.13175	3.52322	-0.888889	0.374063	NA
LOC27207654	231.69	-3.35315	0.345441	-9.70688	2.81845e-22	1.37388e-20
LOC27207656	20.9875	0.888538	0.741786	1.19784	0.230981	0.368193
LOC27207657	1.29686	-3.46365	3.27255	-1.05839	0.289876	NA
LOC27207658	0	NA	NA	NA	NA	NA
LOC27207662	0.62802	3.14517	4.82894	0.651318	0.514841	NA
LOC27207663	0	NA	NA	NA	NA	NA
LOC27207664	1.578	-2.34997	2.84695	-0.825435	0.409125	NA
LOC27207665	0.149495	-0.604684	4.97921	-0.121442	0.903341	NA
LOC27207666	0.31401	2.17029	4.99541	0.434457	0.663957	NA
LOC27207668	12.3786	-0.921429	1.05309	-0.874978	0.381586	0.531701
LOC27207670	0.250389	-0.982176	4.95834	-0.198086	0.842978	NA
LOC27207671	332.476	-0.0548732	0.208534	-0.263138	0.792444	0.866171
LOC27207672	929.395	-0.0687715	0.132408	-0.519389	0.603489	0.730296
LOC27207673	0	NA	NA	NA	NA	NA
LOC27207674	0.332333	2.21155	4.99252	0.442973	0.657785	NA
LOC27207675	0	NA	NA	NA	NA	NA
LOC27207676	0	NA	NA	NA	NA	NA
LOC27207677	0.250389	-0.982176	4.95834	-0.198086	0.842978	NA
LOC27207679	0.564399	0.45884	4.68974	0.0978393	0.92206	NA
LOC27207681	0	NA	NA	NA	NA	NA
LOC27207682	2.48928	-0.720087	2.24763	-0.320376	0.748683	NA
LOC27207684	0.250389	-0.982176	4.95834	-0.198086	0.842978	NA
LOC27207685	0.332333	2.21155	4.99252	0.442973	0.657785	NA
LOC27207686	0.399884	-1.7421	4.89227	-0.356093	0.721771	NA
LOC27207690	1.26327	-1.56258	3.0904	-0.505625	0.61312	NA
LOC27207691	0	NA	NA	NA	NA	NA
LOC27207693	0	NA	NA	NA	NA	NA
LOC27207696	2339.13	0.219712	0.101275	2.16947	0.0300468	0.0755926
LOC27207697	0	NA	NA	NA	NA	NA
LOC27207699	0	NA	NA	NA	NA	NA
LOC27207701	277.483	-1.23697	0.239287	-5.16939	2.34861e-07	2.46982e-06
LOC27207702	784.901	0.197992	0.148125	1.33665	0.181337	0.308273
LOC27207703	178.615	0.144015	0.269373	0.534632	0.592904	0.721345
LOC27207705	4.86298	-0.19621	1.51643	-0.129389	0.89705	0.936805
LOC27207710	703.232	-0.0414145	0.150107	-0.275899	0.782625	0.859592
LOC27207711	0	NA	NA	NA	NA	NA
LOC27207712	5.43254	0.218878	1.433	0.152741	0.878602	0.926843
LOC27207714	6.65374	2.51116	4.62061	0.543469	0.586807	0.715802
LOC27207716	3555.5	0.269434	0.098248	2.74238	0.00609954	0.0205484
LOC27207718	49.7318	1.78395	0.507046	3.51832	0.000434286	0.00214541
LOC27207721	1353.73	0.0639647	0.12267	0.521436	0.602063	0.729713
LOC27207722	0.332333	2.21155	4.99252	0.442973	0.657785	NA
LOC27207723	1.3269	-0.159486	2.94653	-0.0541266	0.956834	NA
LOC27207725	4699.88	0.277002	0.0879316	3.15019	0.00163162	0.00673958
LOC27207729	0	NA	NA	NA	NA	NA
LOC27207730	229.637	0.352673	0.234305	1.50519	0.132276	0.243546
LOC27207733	0	NA	NA	NA	NA	NA
LOC27207736	0	NA	NA	NA	NA	NA
LOC27207737	779.651	-0.49753	0.146978	-3.38505	0.000711644	0.00330118
LOC27207738	1400.81	-0.0212061	0.123789	-0.171308	0.863981	0.917489
LOC27207739	352.578	0.225683	0.193564	1.16594	0.24364	0.38277
LOC27207740	0.94203	3.73006	4.07736	0.914822	0.360285	NA
LOC27207741	0.463506	0.826076	4.97712	0.165975	0.868177	NA
LOC27207743	0	NA	NA	NA	NA	NA
LOC27207745	1.07651	0.439678	3.49338	0.12586	0.899842	NA
LOC27207746	586.802	-1.10819	0.173202	-6.39826	1.57159e-10	2.63615e-09
LOC27207747	15.6521	-7.0431	3.2343	-2.17763	0.0294339	0.0743049
LOC27207749	205.697	0.278096	0.268764	1.03472	0.3008	0.448778
LOC27207752	14446.8	-0.904947	0.102897	-8.79473	1.43391e-18	5.36077e-17
LOC27207753	400.055	0.415953	0.183321	2.26899	0.0232688	0.0616704
LOC27207754	0	NA	NA	NA	NA	NA
LOC27207756	0	NA	NA	NA	NA	NA
LOC27207757	0	NA	NA	NA	NA	NA
LOC27207758	0	NA	NA	NA	NA	NA
LOC27207761	0	NA	NA	NA	NA	NA
LOC27207764	1789.24	0.256527	0.119246	2.15123	0.031458	0.078304
LOC27207765	0	NA	NA	NA	NA	NA
LOC27207766	0.997866	-3.08291	3.60919	-0.854183	0.393004	NA
LOC27207767	0.597981	-2.35333	4.85554	-0.48467	0.627911	NA
LOC27207769	0	NA	NA	NA	NA	NA
LOC27207771	1508.64	-0.056812	0.119153	-0.476798	0.633506	0.752784
LOC27207774	16.773	-7.14817	1.66132	-4.30271	1.68724e-05	0.000121622
LOC27207776	0.149495	-0.604684	4.97921	-0.121442	0.903341	NA
LOC27207779	6.01589	-0.0804746	1.35173	-0.0595346	0.952526	0.971128
LOC27207782	0	NA	NA	NA	NA	NA
LOC27207783	2595.56	-0.594264	0.102183	-5.81569	6.03826e-09	8.31132e-08
LOC27207785	2.04079	-0.217116	2.43156	-0.0892909	0.928851	NA
LOC27207786	0.399884	-1.7421	4.89227	-0.356093	0.721771	NA
LOC27207788	19834.8	-0.929525	0.109289	-8.50517	1.81323e-17	6.01433e-16
LOC27207792	0	NA	NA	NA	NA	NA
LOC27207795	0	NA	NA	NA	NA	NA
LOC27207806	0	NA	NA	NA	NA	NA
LOC27207807	1.14712	0.43255	3.18866	0.135653	0.892096	NA
LOC27207811	0	NA	NA	NA	NA	NA
LOC27207819	33.14	-1.41928	0.613605	-2.31303	0.0207212	0.0560463
LOC27207823	257.803	0.233016	0.223982	1.04033	0.298186	0.445839
LOC27207824	1.94713	-4.04027	2.77559	-1.45565	0.145491	NA
LOC27207830	230.234	-0.786841	0.238486	-3.29932	0.000969193	0.00432096
LOC27207833	10036.2	-0.533845	0.0820416	-6.507	7.66676e-11	1.34481e-09
LOC27207835	1.91355	-2.30746	2.67185	-0.863616	0.387799	NA
LOC27207836	154.606	-1.93222	0.308437	-6.26457	3.73864e-10	5.96492e-09
LOC27207837	236.361	-1.79783	0.260125	-6.9114	4.79888e-12	9.73344e-11
LOC27207839	0	NA	NA	NA	NA	NA
LOC27207840	1692.04	0.220749	0.115693	1.90805	0.0563843	0.125057
LOC27207841	29.811	-0.189139	0.622202	-0.303983	0.761141	0.84568
LOC27207842	0	NA	NA	NA	NA	NA
LOC27207843	1143.38	0.315867	0.13354	2.36533	0.0180138	0.0498701
LOC27207845	443.153	0.0236482	0.182357	0.129681	0.896819	0.936805
LOC27207846	0	NA	NA	NA	NA	NA
LOC27207848	975.392	0.135278	0.135962	0.994966	0.319753	0.468323
LOC27207851	0.448486	-1.94496	4.87837	-0.39869	0.690122	NA
LOC27207852	412.904	-0.415545	0.198085	-2.09781	0.0359219	0.087215
LOC27207855	0.250389	-0.982176	4.95834	-0.198086	0.842978	NA
LOC27207856	2269.67	-0.213165	0.110161	-1.93504	0.052986	0.118925
LOC27207859	5.22092	-1.62288	1.54085	-1.05324	0.292233	0.438946
LOC27207860	0	NA	NA	NA	NA	NA
LOC27207861	0	NA	NA	NA	NA	NA
LOC27207862	73.8363	-0.850872	0.426361	-1.99566	0.045971	0.106234
LOC27207863	194.96	-0.249306	0.259318	-0.96139	0.336356	0.486105
LOC27207864	2.09576	-0.153737	2.40924	-0.0638115	0.94912	NA
LOC27207867	0	NA	NA	NA	NA	NA
LOC27207868	3174.55	0.516962	0.104272	4.95784	7.12822e-07	6.9341e-06
LOC27207869	0.332333	2.21155	4.99252	0.442973	0.657785	NA
LOC27207872	5.13355	0.409188	1.46718	0.278895	0.780325	0.858374
LOC27207875	0	NA	NA	NA	NA	NA
LOC27207877	0	NA	NA	NA	NA	NA
LOC27207878	17.2449	-1.3323	0.878006	-1.51742	0.129162	0.23941
LOC27207879	61.1545	-0.257379	0.440843	-0.583834	0.559332	0.693214
LOC27207880	0.399884	-1.7421	4.89227	-0.356093	0.721771	NA
LOC27207883	2.57759	0.0725028	2.21196	0.0327776	0.973852	NA
LOC27207884	0	NA	NA	NA	NA	NA
LOC27207888	0	NA	NA	NA	NA	NA
LOC27207890	2.30801	5.01594	2.70697	1.85298	0.0638858	NA
LOC27207893	4.40938	-1.77868	1.69261	-1.05085	0.293328	NA
LOC27207894	6.39439	-0.592418	1.34982	-0.438885	0.660745	0.770621
LOC27207897	0	NA	NA	NA	NA	NA
LOC27207898	0	NA	NA	NA	NA	NA
LOC27207901	148.382	-1.30912	0.322826	-4.05517	5.00977e-05	0.000321463
LOC27207902	1.39775	-3.5635	3.14274	-1.13388	0.256844	NA
LOC27207904	0.31401	2.17029	4.99541	0.434457	0.663957	NA
LOC27207905	0	NA	NA	NA	NA	NA
LOC27207907	0	NA	NA	NA	NA	NA
LOC27207908	0	NA	NA	NA	NA	NA
LOC27207910	11.1496	-0.730906	1.0227	-0.714686	0.474803	0.618787
LOC27207911	128.92	-1.11781	0.315072	-3.5478	0.000388465	0.00195184
LOC27207912	822.012	0.114388	0.14023	0.815722	0.414659	0.562506
LOC27207913	4.0513	-0.160803	1.68469	-0.0954498	0.923958	NA
LOC27207921	2260.69	0.339302	0.117783	2.88074	0.0039674	0.0143407
LOC27207923	3280.75	-0.859555	0.0971663	-8.84622	9.05339e-19	3.45792e-17
LOC27207924	1.49471	-0.415137	2.63193	-0.157731	0.874669	NA
LOC27207925	1180.11	-0.13183	0.122329	-1.07766	0.281184	0.426255
LOC27207926	296.532	-0.0487213	0.211648	-0.230199	0.817937	0.884959
LOC27207928	713.877	-0.337043	0.150026	-2.24656	0.024668	0.0645642
LOC27207929	1176.14	0.348248	0.12365	2.81641	0.00485643	0.0169898
LOC27207930	0.250389	-0.982176	4.95834	-0.198086	0.842978	NA
LOC27207931	0.149495	-0.604684	4.97921	-0.121442	0.903341	NA
LOC27207932	347.866	-0.880742	0.201214	-4.37713	1.20253e-05	9.04514e-05
LOC27207933	7.44785	-1.20518	1.25504	-0.960269	0.33692	0.486282
LOC27207936	163.159	0.2087	0.273968	0.761769	0.446198	0.591959
LOC27207937	770.086	0.0468036	0.147534	0.317239	0.751062	0.838176
LOC27207938	615.75	0.0707572	0.154843	0.456961	0.647699	0.761445
LOC27207940	0	NA	NA	NA	NA	NA
LOC27207942	0	NA	NA	NA	NA	NA
LOC27207946	3026.42	-0.0917757	0.0986673	-0.930152	0.352292	0.501901
LOC27207948	1068.78	-0.218224	0.134225	-1.62581	0.10399	0.203211
LOC27207950	2.21191	-1.24562	2.39278	-0.520577	0.602661	NA
LOC27207951	0	NA	NA	NA	NA	NA
LOC27207952	379.321	-0.745199	0.198227	-3.75932	0.000170374	0.000941863
LOC27207956	39.3064	-1.25937	0.597049	-2.10933	0.0349163	0.0852426
LOC27207958	873.263	0.295009	0.135921	2.17045	0.029973	0.0754498
LOC27207959	0.896972	-2.93725	4.1419	-0.709155	0.478228	NA
LOC27207962	0	NA	NA	NA	NA	NA
LOC27207963	0	NA	NA	NA	NA	NA
LOC27207964	0	NA	NA	NA	NA	NA
LOC27207965	0.250389	-0.982176	4.95834	-0.198086	0.842978	NA
LOC27207966	141.932	-0.104346	0.293159	-0.355936	0.721889	0.816358
LOC27207967	0	NA	NA	NA	NA	NA
LOC27207968	0.613001	0.0504208	4.48317	0.0112467	0.991027	NA
LOC27207969	2.59017	-0.799768	2.19744	-0.363955	0.715892	NA
LOC27207973	17.0143	-0.489057	0.823348	-0.593986	0.552522	0.687445
LOC27207974	2425.51	0.101617	0.103071	0.985893	0.324185	0.47338
LOC27207977	3546.61	0.202012	0.0991739	2.03695	0.0416548	0.0982674
LOC27207979	170.699	-3.13242	0.333048	-9.40531	5.1878e-21	2.2886e-19
LOC27207980	908.943	0.151198	0.143276	1.05529	0.291292	0.438129
LOC27207981	521.837	-0.0732473	0.168119	-0.435688	0.663063	0.771998
LOC27207984	0	NA	NA	NA	NA	NA
LOC27207985	533.256	-0.629657	0.168909	-3.7278	0.000193159	0.00105265
LOC27207986	537.467	0.032599	0.169192	0.192675	0.847214	0.904928
LOC27207989	1523.24	0.0202195	0.11403	0.177318	0.859259	0.914063
LOC27207993	742.782	0.288726	0.148009	1.95073	0.0510893	0.115481
LOC27208003	0	NA	NA	NA	NA	NA
LOC27208005	0.911992	-0.936335	3.81381	-0.245512	0.80606	NA
LOC27208006	0	NA	NA	NA	NA	NA
LOC27208007	3869.39	0.239166	0.0904918	2.64295	0.0082187	0.026273
LOC27208010	3.23565	2.05723	1.9106	1.07675	0.281594	NA
LOC27208012	0.332333	2.21155	4.99252	0.442973	0.657785	NA
LOC27208013	836.59	0.316179	0.143059	2.21013	0.0270962	0.0695576
LOC27208015	579.808	0.112929	0.158619	0.711949	0.476496	0.620157
LOC27208016	0	NA	NA	NA	NA	NA
LOC27208017	1076.61	-0.0762874	0.128532	-0.593528	0.552828	0.68747
LOC27208018	7282.07	0.19547	0.0869022	2.24931	0.0244926	0.0642004
LOC27208019	22.7138	-2.9416	0.842375	-3.49203	0.000479373	0.00233545
LOC27208020	1.14712	0.43255	3.18866	0.135653	0.892096	NA
LOC27208021	1.47969	-1.83145	2.95331	-0.620133	0.53517	NA
LOC27208023	371.605	-0.0102188	0.191359	-0.0534013	0.957412	0.973836
LOC27208025	183.232	-1.73219	0.280836	-6.16796	6.91765e-10	1.08025e-08
LOC27208027	406.295	-1.62766	0.198437	-8.20241	2.35614e-16	7.16834e-15
LOC27208029	606.339	-0.16832	0.162138	-1.03813	0.299211	0.446916
LOC27208031	1.44611	-0.292757	2.65508	-0.110263	0.912201	NA
LOC27208032	653.143	0.0408642	0.161247	0.253426	0.799939	0.871987
LOC27208033	0.960353	3.75549	3.69288	1.01695	0.309176	NA
LOC27208035	0	NA	NA	NA	NA	NA
LOC27208036	0	NA	NA	NA	NA	NA
LOC27208040	693.969	-0.0572552	0.149737	-0.382372	0.702185	0.801562
LOC27208041	0.463506	0.826076	4.97712	0.165975	0.868177	NA
LOC27208043	6455.31	-0.357571	0.0925764	-3.86244	0.000112259	0.000652384
LOC27208045	0.814161	1.86827	3.99581	0.467557	0.640101	NA
LOC27208046	10.3553	-1.15369	1.07104	-1.07717	0.281404	0.42631
LOC27208047	4.29366	-1.19393	1.66966	-0.715074	0.474563	NA
LOC27208050	0	NA	NA	NA	NA	NA
LOC27208051	1663.06	-0.668166	0.126749	-5.27159	1.35249e-07	1.49162e-06
LOC27208052	2154.59	0.160169	0.116699	1.3725	0.169907	0.293612
LOC27208053	0.332333	2.21155	4.99252	0.442973	0.657785	NA
LOC27208055	0	NA	NA	NA	NA	NA
LOC27208056	1140.64	-1.03033	0.130143	-7.91692	2.43465e-15	7.01991e-14
LOC27208057	270.014	-0.112471	0.220582	-0.509884	0.610133	0.736315
LOC27208060	16.4509	-1.5518	0.896011	-1.7319	0.0832915	0.169993
LOC27208061	28.7154	0.366899	0.629697	0.58266	0.560122	0.693796
LOC27208062	0	NA	NA	NA	NA	NA
LOC27208064	0	NA	NA	NA	NA	NA
LOC27208067	7003.25	0.336513	0.118136	2.84852	0.00439225	0.0155947
LOC27208070	5572.42	-0.788842	0.106825	-7.38444	1.53096e-13	3.7314e-12
LOC27208071	0	NA	NA	NA	NA	NA
LOC27208073	25.2012	-1.00049	0.691369	-1.44711	0.147867	0.265493
LOC27208074	36.6383	-2.40641	0.623353	-3.86042	0.000113191	0.000656595
LOC27208075	0.332333	2.21155	4.99252	0.442973	0.657785	NA
LOC27208078	0	NA	NA	NA	NA	NA
LOC27208079	577.467	-0.297915	0.162081	-1.83807	0.0660526	0.142038
LOC27208081	0.149495	-0.604684	4.97921	-0.121442	0.903341	NA
LOC27208082	5.6201	1.47373	1.47163	1.00142	0.316623	0.464896
LOC27208084	8.50131	-1.74715	1.22336	-1.42815	0.153248	0.272883
LOC27208085	0	NA	NA	NA	NA	NA
LOC27208089	0.878409	1.46947	3.88791	0.377958	0.705462	NA
LOC27208092	0	NA	NA	NA	NA	NA
LOC27208094	0	NA	NA	NA	NA	NA
LOC27208095	0.500778	-2.04744	4.87204	-0.420242	0.674308	NA
LOC27208096	1.50997	-1.92764	3.17752	-0.606649	0.544084	NA
LOC27208100	5.93867	0.518259	1.40977	0.36762	0.713156	0.810325
LOC27208101	25.6916	-0.197979	0.819603	-0.241555	0.809125	0.878657
LOC27208102	0	NA	NA	NA	NA	NA
LOC27208103	499.502	0.358345	0.174897	2.04889	0.0404729	0.0959152
LOC27208104	0	NA	NA	NA	NA	NA
LOC27208109	0.149495	-0.604684	4.97921	-0.121442	0.903341	NA
LOC27208111	0.250389	-0.982176	4.95834	-0.198086	0.842978	NA
LOC27208115	0.564399	0.45884	4.68974	0.0978393	0.92206	NA
LOC27208118	0.250389	-0.982176	4.95834	-0.198086	0.842978	NA
LOC27208119	0.996998	3.80425	3.98899	0.953686	0.340242	NA
LOC27208120	0.780819	-0.490048	4.05588	-0.120824	0.90383	NA
LOC27208121	0	NA	NA	NA	NA	NA
LOC27208122	92.7595	0.250096	0.357903	0.69878	0.48469	0.627533
LOC27208125	0	NA	NA	NA	NA	NA
LOC27208127	89.2611	-1.44441	0.446124	-3.23769	0.00120503	0.00519142
LOC27208128	1722.07	0.0650472	0.127923	0.508489	0.611111	0.73715
LOC27208129	384.921	-0.922825	0.192347	-4.79772	1.60482e-06	1.43896e-05
LOC27208131	1.25934	1.59214	3.03681	0.524282	0.600082	NA
LOC27208133	0	NA	NA	NA	NA	NA
LOC27208136	212.833	-0.504702	0.250539	-2.01446	0.043961	0.102475
LOC27208139	2584.39	-0.0468007	0.110204	-0.424673	0.671075	0.777837
LOC27208143	0.963656	1.07823	3.68168	0.292863	0.769627	NA
LOC27208146	0	NA	NA	NA	NA	NA
LOC27208148	1.80872	0.156136	2.40003	0.0650558	0.94813	NA
LOC27208149	3.82269	-1.56264	1.79818	-0.869012	0.384841	NA
LOC27208152	6.24426	-0.21877	1.33565	-0.163793	0.869894	0.921046
LOC27208155	1141.89	-0.0458767	0.134069	-0.342188	0.732209	0.824016
LOC27208156	493.612	0.364833	0.203825	1.78994	0.0734642	0.154881
LOC27208159	2.51869	1.598	2.23223	0.715876	0.474068	NA
LOC27208163	0.31401	2.17029	4.99541	0.434457	0.663957	NA
LOC27208164	0.613001	0.0504208	4.48317	0.0112467	0.991027	NA
LOC27208166	0	NA	NA	NA	NA	NA
LOC27208169	0	NA	NA	NA	NA	NA
LOC27208170	20.924	0.462918	0.77222	0.599464	0.548863	0.684082
LOC27208171	0	NA	NA	NA	NA	NA
LOC27208172	0	NA	NA	NA	NA	NA
LOC27208173	5.38208	-5.51935	2.13707	-2.58267	0.00980382	0.0304896
LOC27208181	90.2561	0.682487	0.361816	1.88628	0.059257	0.130024
LOC27208182	633.391	0.956834	0.15282	6.26117	3.82097e-10	6.08527e-09
LOC27208183	0	NA	NA	NA	NA	NA
LOC27208184	1299.92	0.31251	0.118563	2.63583	0.0083932	0.0267244
LOC27208185	7.05363	1.45397	1.30337	1.11555	0.264613	0.4061
LOC27208186	0.62802	3.14517	4.82894	0.651318	0.514841	NA
LOC27208188	1262.37	-0.0188974	0.126874	-0.148945	0.881597	0.928714
LOC27208189	2.12666	-1.24161	2.41528	-0.514063	0.607208	NA
LOC27208190	529.278	-0.322856	0.174444	-1.85077	0.0642031	0.138907
LOC27208191	0	NA	NA	NA	NA	NA
LOC27208192	474.666	-0.194817	0.185734	-1.04891	0.294221	0.441556
LOC27208193	0	NA	NA	NA	NA	NA
LOC27208194	378.99	0.3724	0.191225	1.94744	0.0514816	0.11611
LOC27208195	0.978676	3.77964	3.66754	1.03057	0.302744	NA
LOC27208198	4478.36	-0.113619	0.103581	-1.09691	0.272683	0.415308
LOC27208199	0.996998	3.80425	3.98899	0.953686	0.340242	NA
LOC27208200	0.448486	-1.94496	4.87837	-0.39869	0.690122	NA
LOC27208201	6177.87	0.114796	0.110559	1.03832	0.29912	0.446916
LOC27208202	0.713895	-0.305139	3.89129	-0.0784157	0.937497	NA
LOC27208203	0	NA	NA	NA	NA	NA
LOC27208205	676.927	-1.10043	0.15406	-7.14284	9.14249e-13	2.05776e-11
LOC27208206	387.621	-3.30869	0.233221	-14.1869	1.10364e-45	2.07178e-43
LOC27208207	1.84624	-3.96931	2.84753	-1.39395	0.163332	NA
LOC27208211	0	NA	NA	NA	NA	NA
LOC27208212	118.217	-1.14627	0.334811	-3.42362	0.000617927	0.00292215
LOC27208213	13.3004	-2.86367	1.12416	-2.54739	0.0108532	0.0330883
LOC27208214	3.62123	-3.35656	2.46011	-1.36439	0.172444	NA
LOC27208216	178.716	-0.323456	0.263844	-1.22594	0.220223	0.355086
LOC27208217	2386.1	0.276352	0.108779	2.54048	0.0110699	0.0335982
LOC27208220	0	NA	NA	NA	NA	NA
LOC27208221	0	NA	NA	NA	NA	NA
LOC27208222	0.564399	0.45884	4.68974	0.0978393	0.92206	NA
LOC27208226	220.826	0.256497	0.240795	1.06521	0.28678	0.432967
LOC27208227	4775.63	1.15151	0.803553	1.43303	0.15185	0.271045
LOC27208228	0.149495	-0.604684	4.97921	-0.121442	0.903341	NA
LOC27208231	0	NA	NA	NA	NA	NA
LOC27208232	0.448486	-1.94496	4.87837	-0.39869	0.690122	NA
LOC27208233	0	NA	NA	NA	NA	NA
LOC27208235	0	NA	NA	NA	NA	NA
LOC27208236	497.06	-1.30031	0.185169	-7.0223	2.18253e-12	4.6401e-11
LOC27208239	0	NA	NA	NA	NA	NA
LOC27208240	0	NA	NA	NA	NA	NA
LOC27208244	348.213	-0.0297154	0.202733	-0.146574	0.883468	0.929728
LOC27208248	0.713895	-0.305139	3.89129	-0.0784157	0.937497	NA
LOC27208249	1.44218	2.82181	2.9456	0.957975	0.338075	NA
LOC27208251	591.829	-0.110473	0.157443	-0.701667	0.482887	0.626085
LOC27208252	5.60161	-0.560541	1.41307	-0.396684	0.6916	0.794013
LOC27208253	0	NA	NA	NA	NA	NA
LOC27208258	0.149495	-0.604684	4.97921	-0.121442	0.903341	NA
LOC27208260	0	NA	NA	NA	NA	NA
LOC27208266	14.4117	-0.549563	0.914351	-0.601041	0.547813	0.683546
LOC27208267	1991.01	0.329425	0.117921	2.79361	0.00521228	0.0180245
LOC27208268	925.652	-0.0698812	0.135023	-0.517549	0.604773	0.731548
LOC27208273	601.164	-0.503241	0.159886	-3.1475	0.00164676	0.00679576
LOC27208275	7.59411	-5.99628	1.87285	-3.20168	0.00136629	0.00579557
LOC27208279	0	NA	NA	NA	NA	NA
LOC27208280	0.332333	2.21155	4.99252	0.442973	0.657785	NA
LOC27208281	9.38649	-0.513541	1.12356	-0.457065	0.647624	0.761445
LOC27208282	975.899	-1.96453	0.166183	-11.8215	3.02291e-32	2.74961e-30
LOC27208284	523.752	0.235724	0.166329	1.41721	0.15642	0.277017
LOC27208286	850.099	-0.544024	0.139655	-3.89548	9.80026e-05	0.000577607
LOC27208287	29.1819	-0.877547	0.642647	-1.36552	0.17209	0.296263
LOC27208288	0	NA	NA	NA	NA	NA
LOC27208293	0	NA	NA	NA	NA	NA
LOC27208294	0	NA	NA	NA	NA	NA
LOC27208295	1.1774	0.196534	3.10172	0.063363	0.949477	NA
LOC27208296	110.378	-0.532885	0.344303	-1.54772	0.12169	0.228927
LOC27208297	0.149495	-0.604684	4.97921	-0.121442	0.903341	NA
LOC27208298	849.902	-0.674678	0.14233	-4.74024	2.13465e-06	1.86291e-05
LOC27208301	0	NA	NA	NA	NA	NA
LOC27208306	1564.46	0.448966	0.111778	4.0166	5.90438e-05	0.000371042
LOC27208307	36.6375	-0.726785	0.577836	-1.25777	0.208475	0.341067
LOC27208310	7.59629	1.71989	1.27586	1.34802	0.177652	0.303647
LOC27208313	1218.13	-0.036267	0.125441	-0.289117	0.772492	0.853669
LOC27208314	2.70876	-0.11345	2.00724	-0.0565204	0.954927	NA
LOC27208315	0.900663	-2.90388	3.78146	-0.767924	0.442533	NA
LOC27208320	0.915055	1.54244	3.82905	0.402826	0.687076	NA
LOC27208323	96.3894	-0.141209	0.350612	-0.402752	0.687131	0.790528
LOC27208324	0	NA	NA	NA	NA	NA
LOC27208325	0	NA	NA	NA	NA	NA
LOC27208327	0	NA	NA	NA	NA	NA
LOC27208328	1070.88	-0.202743	0.151731	-1.3362	0.181485	0.308405
LOC27208329	49.1818	0.249594	0.50077	0.498421	0.618187	0.741656
LOC27208331	1635.98	-0.493664	0.115427	-4.27684	1.89568e-05	0.000134938
LOC27208333	5193.36	0.247085	0.0900162	2.74489	0.00605305	0.0204308
LOC27208335	810.229	-0.313423	0.141278	-2.21848	0.0265223	0.0684831
LOC27208337	15.1383	-1.87589	0.927642	-2.02222	0.043154	0.10094
LOC27208338	0	NA	NA	NA	NA	NA
LOC27208339	1.50973	0.801274	2.598	0.30842	0.757763	NA
LOC27208340	25485.7	-0.866985	0.0821342	-10.5557	4.77991e-26	3.10097e-24
LOC27208341	1081.65	-1.40862	0.162659	-8.65997	4.71895e-18	1.6522e-16
LOC27208345	0.399884	-1.7421	4.89227	-0.356093	0.721771	NA
LOC27208347	0	NA	NA	NA	NA	NA
LOC27208348	1110.61	-0.628018	0.147123	-4.26867	1.96638e-05	0.000139464
LOC27208349	1922.78	-0.128745	0.124901	-1.03077	0.302647	0.450751
LOC27208351	929.64	-0.679422	0.139505	-4.87023	1.1147e-06	1.03636e-05
LOC27208352	0	NA	NA	NA	NA	NA
LOC27208354	0	NA	NA	NA	NA	NA
LOC27208355	32.3039	-0.787225	0.637411	-1.23504	0.216817	0.35094
LOC27208356	553.523	-0.471495	0.165788	-2.84397	0.00445557	0.0158004
LOC27208359	6.35963	0.0608917	1.34201	0.0453736	0.96381	0.977522
LOC27208361	0.149495	-0.604684	4.97921	-0.121442	0.903341	NA
LOC27208369	0.31401	2.17029	4.99541	0.434457	0.663957	NA
LOC27208373	0	NA	NA	NA	NA	NA
LOC27208376	1.58059	-1.94069	2.85293	-0.680245	0.49635	NA
LOC27208377	0	NA	NA	NA	NA	NA
LOC27208378	409.801	-0.772642	0.192009	-4.02399	5.72198e-05	0.000361161
LOC27208379	329.399	-0.223045	0.202379	-1.10211	0.270413	0.413135
LOC27208381	0.964284	-0.995269	3.45808	-0.28781	0.773492	NA
LOC27208385	1.21074	2.12601	3.1703	0.670604	0.502473	NA
LOC27208387	928.651	0.213066	0.133518	1.59578	0.110537	0.212709
LOC27208391	0.927011	1.01066	3.73712	0.270437	0.786824	NA
LOC27208393	0	NA	NA	NA	NA	NA
LOC27208394	203.711	3.21077	0.295265	10.8742	1.53037e-27	1.05488e-25
LOC27208395	0.463506	0.826076	4.97712	0.165975	0.868177	NA
LOC27208398	0	NA	NA	NA	NA	NA
LOC27208402	0	NA	NA	NA	NA	NA
LOC27208405	101.547	-0.487757	0.345026	-1.41368	0.157455	0.277857
LOC27208407	93.2653	-0.894714	0.431342	-2.07426	0.0380555	0.0912898
[truncated: 12,258 more rows]
