# Supplementary material for: Molecular Insights into Female Hybrid Sterility in Interspecific Crosses between <em>Drosophila melanogaster</em> and <em>Drosophila simulans</em>
Source: Preprints.org preprint supplement (doi:10.20944/preprints202404.1438.v1), 2024-04-23
Supplement: Supplementary file 1 [file supplementary › Table S4.xlsx]

## Sheet: enrichment (8)
Enrichment FDR	number ofGenes	Pathway Genes	Fold Enrichment	Pathway	URL	Genes
0.00207578	3	14	56.4744	GO:0006697 ecdysone biosynthetic proc.	http://amigo.geneontology.org/amigo/term/GO:0006697	sad dib sro
0.00272694	3	16	49.4151	GO:0008205 ecdysone metabolic proc.	http://amigo.geneontology.org/amigo/term/GO:0008205	sad dib sro
0.00293547	3	17	46.5083	GO:1902653 secondary alcohol biosynthetic proc.	http://amigo.geneontology.org/amigo/term/GO:1902653	sad dib sro
0.0374512	2	12	43.9245	GO:0030381 chorion-containing eggshell pattern formation	http://amigo.geneontology.org/amigo/term/GO:0030381	rhi Oxp
0.00101495	4	26	40.5457	GO:0045456 ecdysteroid biosynthetic proc.	http://amigo.geneontology.org/amigo/term/GO:0045456	sad dib GstE14 sro
0.00101495	4	26	40.5457	GO:0120178 steroid hormone biosynthetic proc.	http://amigo.geneontology.org/amigo/term/GO:0120178	sad dib GstE14 sro
0.00771728	3	24	32.9434	GO:0016126 sterol biosynthetic proc.	http://amigo.geneontology.org/amigo/term/GO:0016126	sad dib sro
0.00207578	4	37	28.4916	GO:0042446 hormone biosynthetic proc.	http://amigo.geneontology.org/amigo/term/GO:0042446	sad dib GstE14 sro
0.00925294	3	28	28.2372	GO:0034587 piRNA metabolic proc.	http://amigo.geneontology.org/amigo/term/GO:0034587	rhi Oxp del
0.00207578	4	40	26.3547	GO:0006694 steroid biosynthetic proc.	http://amigo.geneontology.org/amigo/term/GO:0006694	sad dib GstE14 sro
0.00207578	4	41	25.7119	GO:0042181 ketone biosynthetic proc.	http://amigo.geneontology.org/amigo/term/GO:0042181	sad dib GstE14 sro
0.00207578	4	42	25.0997	GO:0045455 ecdysteroid metabolic proc.	http://amigo.geneontology.org/amigo/term/GO:0045455	sad dib GstE14 sro
0.0135382	3	33	23.9588	GO:1902652 secondary alcohol metabolic proc.	http://amigo.geneontology.org/amigo/term/GO:1902652	sad dib sro
0.0155073	3	36	21.9623	GO:0016125 sterol metabolic proc.	http://amigo.geneontology.org/amigo/term/GO:0016125	sad dib sro
0.00773077	4	66	15.9726	GO:0034754 cellular hormone metabolic proc.	http://amigo.geneontology.org/amigo/term/GO:0034754	sad dib GstE14 sro
0.00773077	4	67	15.7342	GO:0008202 steroid metabolic proc.	http://amigo.geneontology.org/amigo/term/GO:0008202	sad dib GstE14 sro
0.0413242	3	53	14.9178	GO:0046165 alcohol biosynthetic proc.	http://amigo.geneontology.org/amigo/term/GO:0046165	sad dib sro
0.00925294	4	73	14.4409	GO:0042180 cellular ketone metabolic proc.	http://amigo.geneontology.org/amigo/term/GO:0042180	sad dib GstE14 sro
0.0155073	4	87	12.1171	GO:0042445 hormone metabolic proc.	http://amigo.geneontology.org/amigo/term/GO:0042445	sad dib GstE14 sro
0.0344209	4	110	9.58353	GO:0010817 reg. of hormone levels	http://amigo.geneontology.org/amigo/term/GO:0010817	sad dib GstE14 sro
